# Supplementary material
Source: PubMed Central journal article supplement (PMC10591928)
Supplement: NIHMS1936295-supplement-DFT_Coordinates.pdf [file NIHMS1936295-supplement-DFT_Coordinates.pdf]

## Supporting Information

### **Asymmetric Aromatic Finkelstein Reaction: A Peptide Catalysis Platform for Diarylmethine Desymmetrization**

Tobias Morack<sup>a</sup>, Tyler E. Myers<sup>a</sup>, Lucas J. Karas<sup>b</sup>, Melissa A. Hardy<sup>b</sup>, Brandon Q. Mercado<sup>a</sup>,  
Matthew S. Sigman<sup>b\*</sup>, Scott J. Miller<sup>a\*</sup>

<sup>a</sup>Department of Chemistry, Yale University, New Haven, Connecticut 06520 – 8170, United States

<sup>b</sup>Department of Chemistry, University of Utah, 315 South 1400 East, Salt Lake City, Utah 84112, United States

# 1. Optimized Cartesian coordinates for all structures

3-conf01

- Electronic Energy (Eh): -6818.72907025

- Cartesian Coordinates:

|    |           |           |           |
|----|-----------|-----------|-----------|
| Br | 3.420116  | -0.613522 | 2.251994  |
| C  | 2.875182  | 0.228927  | 0.639925  |
| C  | 1.702247  | 0.974529  | 0.653464  |
| C  | 1.242617  | 1.622669  | -0.498225 |
| C  | -0.036330 | 2.445498  | -0.561738 |
| C  | -0.074594 | 3.718043  | 0.363886  |
| C  | 1.206368  | 4.528180  | 0.120340  |
| C  | -1.285166 | 4.571572  | -0.044689 |
| C  | -0.195099 | 3.403072  | 1.860546  |
| C  | -1.296945 | 1.592556  | -0.502903 |
| C  | -1.538510 | 0.647968  | 0.498619  |
| C  | -2.716881 | -0.088511 | 0.521599  |
| Br | -2.962870 | -1.346980 | 1.922064  |
| C  | -3.708052 | 0.081180  | -0.459899 |
| N  | -4.880561 | -0.685987 | -0.395764 |
| C  | -5.942656 | -0.652626 | -1.239689 |
| C  | -7.067811 | -1.649460 | -0.858955 |
| F  | -6.781669 | -2.343910 | 0.253402  |
| F  | -8.198605 | -0.992199 | -0.650270 |
| F  | -7.252910 | -2.515439 | -1.844304 |
| O  | -6.093210 | 0.041789  | -2.214019 |
| C  | -3.465124 | 1.019125  | -1.470488 |
| C  | -2.282762 | 1.749813  | -1.481683 |
| C  | 2.017417  | 1.483664  | -1.653930 |
| C  | 3.192145  | 0.741114  | -1.680769 |
| C  | 3.647296  | 0.093971  | -0.525979 |
| N  | 4.823068  | -0.669732 | -0.490048 |
| C  | 5.697564  | -0.896873 | -1.502704 |
| C  | 6.900638  | -1.785851 | -1.094052 |
| F  | 8.028593  | -1.103536 | -1.229396 |
| F  | 6.953533  | -2.856527 | -1.871034 |
| F  | 6.820093  | -2.201691 | 0.179615  |
| O  | 5.639161  | -0.490968 | -2.636613 |
| H  | 1.158454  | 1.043417  | 1.593297  |
| H  | -0.035827 | 2.872406  | -1.576483 |
| H  | 1.177791  | 5.469526  | 0.690335  |
| H  | 1.320284  | 4.784214  | -0.945307 |
| H  | 2.104449  | 3.973616  | 0.430247  |
| H  | -2.235905 | 4.057322  | 0.159810  |
| H  | -1.258392 | 4.821495  | -1.117467 |
| H  | -1.288733 | 5.517825  | 0.517468  |
| H  | -0.327723 | 4.340447  | 2.422440  |
| H  | 0.707348  | 2.921202  | 2.261740  |
| H  | -1.065948 | 2.767107  | 2.079032  |
| H  | -0.804630 | 0.459276  | 1.279961  |
| H  | -4.933339 | -1.339875 | 0.379881  |
| H  | -4.214628 | 1.163200  | -2.245179 |
| H  | -2.127766 | 2.471637  | -2.286930 |
| H  | 1.694944  | 1.973535  | -2.575766 |
| H  | 3.772400  | 0.652933  | -2.596319 |
| H  | 5.037902  | -1.099913 | 0.404803  |

-----  
3-conf02

- Electronic Energy (Eh): -6818.72892987

- Cartesian Coordinates:

|    |           |          |           |
|----|-----------|----------|-----------|
| Br | 4.699145  | 1.414238 | -2.090259 |
| C  | 3.385492  | 0.905266 | -0.818076 |
| C  | 2.227388  | 1.667049 | -0.721015 |
| C  | 1.220210  | 1.349891 | 0.195641  |
| C  | -0.010552 | 2.245033 | 0.265064  |
| C  | 0.019109  | 3.296778 | 1.435420  |

|    |           |           |           |
|----|-----------|-----------|-----------|
| C  | -1.208543 | 4.207332  | 1.292163  |
| C  | 0.021914  | 2.675542  | 2.837738  |
| C  | 1.288808  | 4.148295  | 1.283092  |
| C  | -1.316559 | 1.479874  | 0.105720  |
| C  | -1.831401 | 0.599702  | 1.063735  |
| C  | -3.029860 | -0.071862 | 0.852721  |
| Br | -3.650883 | -1.245601 | 2.209902  |
| C  | -3.773022 | 0.102733  | -0.326862 |
| N  | -4.976630 | -0.597599 | -0.494144 |
| C  | -5.823356 | -0.552956 | -1.553705 |
| C  | -7.062159 | -1.472143 | -1.395431 |
| F  | -7.074277 | -2.379124 | -2.361021 |
| F  | -7.071887 | -2.119757 | -0.219861 |
| F  | -8.170091 | -0.750732 | -1.473474 |
| O  | -5.713674 | 0.098278  | -2.562634 |
| C  | -3.261828 | 0.982015  | -1.288507 |
| C  | -2.062113 | 1.647515  | -1.065250 |
| C  | 1.423494  | 0.224653  | 1.000177  |
| C  | 2.577223  | -0.546202 | 0.912024  |
| C  | 3.587450  | -0.219164 | -0.000764 |
| N  | 4.769569  | -0.962895 | -0.130536 |
| C  | 5.142927  | -2.060858 | 0.574100  |
| C  | 6.526909  | -2.622736 | 0.157416  |
| F  | 7.348426  | -2.609241 | 1.196581  |
| F  | 7.094009  | -1.908236 | -0.827136 |
| F  | 6.395934  | -3.870550 | -0.267124 |
| O  | 4.534924  | -2.619359 | 1.453048  |
| H  | 2.112674  | 2.532013  | -1.376988 |
| H  | 0.047670  | 2.873436  | -0.636961 |
| H  | -1.182800 | 5.006077  | 2.049231  |
| H  | -2.147040 | 3.648529  | 1.423440  |
| H  | -1.237798 | 4.686044  | 0.300082  |
| H  | 0.852522  | 1.967030  | 2.973056  |
| H  | -0.923308 | 2.165371  | 3.070179  |
| H  | 0.145976  | 3.469795  | 3.589961  |
| H  | 1.292309  | 4.960444  | 2.025957  |
| H  | 1.347001  | 4.610379  | 0.284387  |
| H  | 2.201069  | 3.552310  | 1.434426  |
| H  | -1.310669 | 0.422727  | 2.002398  |
| H  | -5.238338 | -1.207911 | 0.274658  |
| H  | -3.818137 | 1.134600  | -2.210372 |
| H  | -1.696024 | 2.325744  | -1.839714 |
| H  | 0.668367  | -0.084976 | 1.721288  |
| H  | 2.709632  | -1.416388 | 1.550645  |
| H  | 5.418970  | -0.631204 | -0.837818 |

-----  
3-conf03

- Electronic Energy (Eh): -6818.7289882

- Cartesian Coordinates:

|    |           |           |           |
|----|-----------|-----------|-----------|
| Br | -4.245726 | 1.119522  | 2.496613  |
| C  | -3.199036 | 0.865101  | 0.933974  |
| C  | -2.035836 | 1.611329  | 0.786721  |
| C  | -1.216984 | 1.476513  | -0.338872 |
| C  | 0.044164  | 2.326505  | -0.415117 |
| C  | 0.112197  | 3.336043  | -1.620843 |
| C  | 0.332545  | 2.670741  | -2.985274 |
| C  | -1.198290 | 4.134877  | -1.653722 |
| C  | 1.276609  | 4.306273  | -1.367743 |
| C  | 1.318273  | 1.519486  | -0.203857 |
| C  | 1.622500  | 0.364249  | -0.929315 |
| C  | 2.810871  | -0.324100 | -0.716650 |
| Br | 3.144615  | -1.881978 | -1.749490 |
| C  | 3.749494  | 0.108086  | 0.235854  |
| N  | 4.935003  | -0.619951 | 0.415019  |
| C  | 5.954335  | -0.351128 | 1.269308  |

|   |           |           |           |
|---|-----------|-----------|-----------|
| C | 7.117705  | -1.373024 | 1.185981  |
| F | 8.228766  | -0.757613 | 0.807644  |
| F | 7.318432  | -1.924418 | 2.372969  |
| F | 6.871870  | -2.357815 | 0.307954  |
| O | 6.045826  | 0.564391  | 2.048901  |
| C | 3.443257  | 1.259071  | 0.971597  |
| C | 2.251324  | 1.938715  | 0.749000  |
| C | -1.623058 | 0.554227  | -1.310191 |
| C | -2.784345 | -0.198087 | -1.174760 |
| C | -3.600033 | -0.058080 | -0.045405 |
| N | -4.780599 | -0.792311 | 0.139674  |
| C | -5.325421 | -1.714175 | -0.693882 |
| C | -6.643377 | -2.331156 | -0.158206 |
| F | -6.497582 | -3.639120 | -0.006605 |
| F | -7.625939 | -2.107827 | -1.017784 |
| F | -7.005132 | -1.815396 | 1.026883  |
| O | -4.906139 | -2.087318 | -1.761218 |
| H | -1.763984 | 2.316941  | 1.574167  |
| H | -0.014675 | 2.988448  | 0.462588  |
| H | 0.467470  | 3.447384  | -3.753827 |
| H | -0.527261 | 2.062621  | -3.298312 |
| H | 1.235418  | 2.042163  | -2.995815 |
| H | -1.385970 | 4.634000  | -0.689343 |
| H | -2.062756 | 3.490899  | -1.872921 |
| H | -1.152103 | 4.913404  | -2.430628 |
| H | 1.297694  | 5.084233  | -2.146041 |
| H | 2.248605  | 3.791336  | -1.383280 |
| H | 1.175656  | 4.811905  | -0.393939 |
| H | 0.929928  | -0.028095 | -1.671783 |
| H | 5.033773  | -1.445079 | -0.169354 |
| H | 4.151100  | 1.609039  | 1.719335  |
| H | 2.045942  | 2.832261  | 1.343106  |
| H | -1.035557 | 0.404421  | -2.214713 |
| H | -3.075923 | -0.906295 | -1.946840 |
| H | -5.281885 | -0.603460 | 1.002860  |

-----  
3-conf04

- Electronic Energy (Eh): -6818.72878518

- Cartesian Coordinates:

|    |           |           |           |
|----|-----------|-----------|-----------|
| Br | -4.598256 | -1.589695 | -1.776400 |
| C  | -3.373731 | -0.881343 | -0.510616 |
| C  | -2.197609 | -1.579433 | -0.264620 |
| C  | -1.253428 | -1.115905 | 0.656601  |
| C  | 0.000714  | -1.946564 | 0.895172  |
| C  | -0.047536 | -2.835425 | 2.192871  |
| C  | -0.140371 | -2.035263 | 3.497624  |
| C  | -1.276765 | -3.752275 | 2.100056  |
| C  | 1.217809  | -3.704194 | 2.225748  |
| C  | 1.288507  | -1.159863 | 0.691941  |
| C  | 2.090165  | -1.479284 | -0.408420 |
| C  | 3.280462  | -0.807727 | -0.660817 |
| Br | 4.301152  | -1.314567 | -2.178645 |
| C  | 3.726975  | 0.223116  | 0.181864  |
| N  | 4.934022  | 0.876378  | -0.106756 |
| C  | 5.527420  | 1.874914  | 0.595022  |
| C  | 6.865940  | 2.355416  | -0.023144 |
| F  | 6.786344  | 3.643259  | -0.321757 |
| F  | 7.850684  | 2.178274  | 0.845136  |
| F  | 7.179500  | 1.689111  | -1.145288 |
| O  | 5.137108  | 2.402474  | 1.606640  |
| C  | 2.927597  | 0.548978  | 1.284397  |
| C  | 1.738871  | -0.130297 | 1.525987  |
| C  | -1.538122 | 0.087384  | 1.309201  |
| C  | -2.710619 | 0.795593  | 1.071107  |
| C  | -3.657948 | 0.322656  | 0.154599  |
| N  | -4.856303 | 0.996956  | -0.122217 |
| C  | -5.308414 | 2.150454  | 0.431547  |
| C  | -6.691403 | 2.596840  | -0.109597 |
| F  | -6.600693 | 3.810738  | -0.630435 |

|   |           |           |           |
|---|-----------|-----------|-----------|
| F | -7.573047 | 2.621118  | 0.879503  |
| F | -7.159702 | 1.772478  | -1.059683 |
| O | -4.770129 | 2.830849  | 1.268978  |
| H | -2.018484 | -2.511083 | -0.804649 |
| H | 0.001893  | -2.691000 | 0.084148  |
| H | -0.247090 | -2.728912 | 4.345905  |
| H | -1.015379 | -1.368803 | 3.510389  |
| H | 0.763633  | -1.439513 | 3.685775  |
| H | -1.265977 | -4.348631 | 1.173415  |
| H | -2.215866 | -3.179706 | 2.123682  |
| H | -1.291325 | -4.454484 | 2.947484  |
| H | 1.180977  | -4.401151 | 3.077015  |
| H | 2.127509  | -3.094239 | 2.328870  |
| H | 1.315925  | -4.303278 | 1.305980  |
| H | 1.783733  | -2.274507 | -1.090747 |
| H | 5.415692  | 0.555414  | -0.941709 |
| H | 3.253697  | 1.343915  | 1.951041  |
| H | 1.164648  | 0.166328  | 2.402145  |
| H | -0.834425 | 0.508005  | 2.025991  |
| H | -2.907566 | 1.728898  | 1.593426  |
| H | -5.451716 | 0.560530  | -0.820141 |

-----  
3-conf05

- Electronic Energy (Eh): -6818.72907057

- Cartesian Coordinates:

|    |           |           |           |
|----|-----------|-----------|-----------|
| Br | 2.962245  | -1.346916 | 1.922114  |
| C  | 2.716564  | -0.088520 | 0.521532  |
| C  | 1.538258  | 0.648051  | 0.498312  |
| C  | 1.296907  | 1.592581  | -0.503322 |
| C  | 0.036402  | 2.445665  | -0.562407 |
| C  | 0.074803  | 3.718450  | 0.362894  |
| C  | -1.205962 | 4.528764  | 0.118903  |
| C  | 0.194967  | 3.403891  | 1.859670  |
| C  | 1.285623  | 4.571614  | -0.045714 |
| C  | -1.242591 | 1.622930  | -0.498672 |
| C  | -1.702339 | 0.975301  | 0.653263  |
| C  | -2.875231 | 0.229643  | 0.639932  |
| Br | -3.420340 | -0.612084 | 2.252313  |
| C  | -3.647199 | 0.094120  | -0.526020 |
| N  | -4.822954 | -0.669603 | -0.489861 |
| C  | -5.696615 | -0.898387 | -1.502878 |
| C  | -6.900140 | -1.786561 | -1.093694 |
| F  | -8.027723 | -1.103513 | -1.228883 |
| F  | -6.953988 | -2.857342 | -1.870405 |
| F  | -6.819585 | -2.202141 | 0.180048  |
| O  | -5.637397 | -0.494155 | -2.637331 |
| C  | -3.191954 | 0.740772  | -1.681047 |
| C  | -2.017250 | 1.483377  | -1.654395 |
| C  | 2.282856  | 1.749614  | -1.482007 |
| C  | 3.465152  | 1.018824  | -1.470591 |
| C  | 3.707875  | 0.080979  | -0.459860 |
| N  | 4.880293  | -0.686327 | -0.395518 |
| C  | 5.942642  | -0.652899 | -1.239123 |
| C  | 7.067562  | -1.649988 | -0.858286 |
| F  | 6.780831  | -2.345014 | 0.253554  |
| F  | 8.198284  | -0.992878 | -0.648657 |
| F  | 7.253162  | -2.515452 | -1.843986 |
| O  | 6.093625  | 0.041776  | -2.213192 |
| H  | 0.804218  | 0.459418  | 1.279524  |
| H  | 0.035954  | 2.872315  | -1.577259 |
| H  | -1.177343 | 5.470233  | 0.688700  |
| H  | -2.104192 | 3.974409  | 0.428759  |
| H  | -1.319609 | 4.784583  | -0.946824 |
| H  | 1.065401  | 2.767451  | 2.078442  |
| H  | -0.707836 | 2.922732  | 2.260917  |
| H  | 0.328153  | 4.341376  | 2.421247  |
| H  | 1.289081  | 5.518178  | 0.515922  |
| H  | 1.259284  | 4.820951  | -1.118640 |
| H  | 2.236223  | 4.057358  | 0.159408  |

|   |           |           |           |
|---|-----------|-----------|-----------|
| H | -1.158613 | 1.044622  | 1.593104  |
| H | -5.038151 | -1.098918 | 0.405316  |
| H | -3.772056 | 0.652112  | -2.596643 |
| H | -1.694669 | 1.972827  | -2.576419 |
| H | 2.128032  | 2.471362  | -2.287358 |
| H | 4.214797  | 1.162778  | -2.245169 |
| H | 4.932675  | -1.340522 | 0.379891  |

-----  
3-conf06

- Electronic Energy (Eh): -6818.72893001

- Cartesian Coordinates:

|    |           |           |           |
|----|-----------|-----------|-----------|
| Br | 3.651107  | -1.244675 | 2.210333  |
| C  | 3.029900  | -0.071455 | 0.852788  |
| C  | 1.831489  | 0.600225  | 1.063732  |
| C  | 1.316517  | 1.480021  | 0.105456  |
| C  | 0.010521  | 2.245249  | 0.264654  |
| C  | -0.019197 | 3.297187  | 1.434827  |
| C  | -0.022520 | 2.676200  | 2.837258  |
| C  | 1.208661  | 4.207478  | 1.291720  |
| C  | -1.288689 | 4.148944  | 1.282046  |
| C  | -1.220205 | 1.350049  | 0.195367  |
| C  | -2.227439 | 1.667018  | -0.721283 |
| C  | -3.385498 | 0.905142  | -0.818183 |
| Br | -4.699224 | 1.413805  | -2.090416 |
| C  | -3.587345 | -0.219193 | -0.000721 |
| N  | -4.769415 | -0.963021 | -0.130320 |
| C  | -5.142750 | -2.060819 | 0.574596  |
| C  | -6.526639 | -2.622938 | 0.157931  |
| F  | -7.094538 | -1.907695 | -0.825633 |
| F  | -6.395212 | -3.870245 | -0.268031 |
| F  | -7.347687 | -2.610996 | 1.197445  |
| O  | -4.534670 | -2.619185 | 1.453567  |
| C  | -2.577024 | -0.546068 | 0.912033  |
| C  | -1.423352 | 0.224879  | 1.000036  |
| C  | 2.061879  | 1.647168  | -1.065712 |
| C  | 3.261531  | 0.981535  | -1.288905 |
| C  | 3.772867  | 0.102631  | -0.326987 |
| N  | 4.976433  | -0.597803 | -0.494166 |
| C  | 5.822828  | -0.553906 | -1.554022 |
| C  | 7.061971  | -1.472546 | -1.395249 |
| F  | 7.075445  | -2.378913 | -2.361348 |
| F  | 7.071088  | -2.120828 | -0.220042 |
| F  | 8.169593  | -0.750443 | -1.471895 |
| O  | 5.712818  | 0.096571  | -2.563402 |
| H  | 1.310897  | 0.423626  | 2.002544  |
| H  | -0.047675 | 2.873492  | -0.637487 |
| H  | -0.146662 | 3.470609  | 3.589304  |
| H  | 0.922538  | 2.165908  | 3.070101  |
| H  | -0.853286 | 1.967847  | 2.972453  |
| H  | 1.238279  | 4.685972  | 0.299543  |
| H  | 2.147027  | 3.648540  | 1.423369  |
| H  | 1.182846  | 5.006384  | 2.048618  |
| H  | -1.292215 | 4.961199  | 2.024796  |
| H  | -2.201117 | 3.553177  | 1.433242  |
| H  | -1.346521 | 4.610896  | 0.283258  |
| H  | -2.112804 | 2.531889  | -1.377395 |
| H  | -5.418932 | -0.631438 | -0.837546 |
| H  | -2.709294 | -1.416209 | 1.550743  |
| H  | -0.668145 | -0.084596 | 1.721135  |
| H  | 1.695676  | 2.325091  | -1.840391 |
| H  | 3.817668  | 1.133714  | -2.210941 |
| H  | 5.238249  | -1.207761 | 0.274880  |

-----  
3-conf07

- Electronic Energy (Eh): -6818.72898831

- Cartesian Coordinates:

|    |          |           |          |
|----|----------|-----------|----------|
| Br | 3.144651 | -1.881744 | 1.749668 |
| C  | 2.810890 | -0.323941 | 0.716724 |

|    |           |           |           |
|----|-----------|-----------|-----------|
| C  | 1.622519  | 0.364416  | 0.929349  |
| C  | 1.318282  | 1.519598  | 0.203805  |
| C  | 0.044149  | 2.326587  | 0.415022  |
| C  | 0.112144  | 3.336179  | 1.620714  |
| C  | 1.276414  | 4.306545  | 1.367492  |
| C  | -1.198424 | 4.134871  | 1.653695  |
| C  | 0.332710  | 2.670927  | 2.985133  |
| C  | -1.216994 | 1.476580  | 0.338801  |
| C  | -2.035907 | 1.611425  | -0.786732 |
| C  | -3.199125 | 0.865196  | -0.933926 |
| Br | -4.245924 | 1.119676  | -2.496476 |
| C  | -3.600038 | -0.058022 | 0.045443  |
| N  | -4.780618 | -0.792263 | -0.139570 |
| C  | -5.325245 | -1.714308 | 0.693907  |
| C  | -6.643072 | -2.331515 | 0.158185  |
| F  | -7.005126 | -1.815473 | -1.026673 |
| F  | -6.496865 | -3.639392 | 0.006107  |
| F  | -7.625596 | -2.108815 | 1.017963  |
| O  | -4.905866 | -2.087475 | 1.761199  |
| C  | -2.784280 | -0.198061 | 1.174748  |
| C  | -1.623000 | 0.554264  | 1.310130  |
| C  | 2.251318  | 1.938770  | -0.749083 |
| C  | 3.443261  | 1.259122  | -0.971633 |
| C  | 3.749508  | 0.108188  | -0.235815 |
| N  | 4.935010  | -0.619869 | -0.414926 |
| C  | 5.954308  | -0.351188 | -1.269302 |
| C  | 7.117542  | -1.373243 | -1.186084 |
| F  | 8.228930  | -0.757860 | -0.808738 |
| F  | 7.317469  | -1.925319 | -2.372908 |
| F  | 6.872016  | -2.357527 | -0.307401 |
| O  | 6.045811  | 0.564264  | -2.048976 |
| H  | 0.929960  | -0.027856 | 1.671865  |
| H  | -0.014704 | 2.988479  | -0.462720 |
| H  | 1.297572  | 5.084440  | 2.145849  |
| H  | 1.175222  | 4.812251  | 0.393751  |
| H  | 2.248461  | 3.791700  | 1.382811  |
| H  | -2.062781 | 3.490838  | 1.873152  |
| H  | -1.386338 | 4.633813  | 0.689270  |
| H  | -1.152182 | 4.913533  | 2.430460  |
| H  | 0.467397  | 3.447595  | 3.753701  |
| H  | 1.235772  | 2.042622  | 2.995638  |
| H  | -0.526894 | 2.062529  | 3.298177  |
| H  | -1.764113 | 2.317063  | -1.574173 |
| H  | -5.281920 | -0.603467 | -1.002758 |
| H  | -3.075800 | -0.906310 | 1.946810  |
| H  | -1.035454 | 0.404455  | 2.214621  |
| H  | 2.045920  | 2.832273  | -1.343249 |
| H  | 4.151089  | 1.609044  | -1.719404 |
| H  | 5.033820  | -1.444889 | 0.169592  |

-----  
3-conf08

- Electronic Energy (Eh): -6818.72896148

- Cartesian Coordinates:

|    |           |           |           |
|----|-----------|-----------|-----------|
| Br | 4.630075  | 1.430984  | -2.136276 |
| C  | 3.362776  | 0.918939  | -0.819199 |
| C  | 2.198234  | 1.666812  | -0.694354 |
| C  | 1.223066  | 1.347073  | 0.255530  |
| C  | -0.016219 | 2.227998  | 0.347918  |
| C  | -0.005318 | 3.243744  | 1.549656  |
| C  | -0.045779 | 2.581011  | 2.931833  |
| C  | 1.274552  | 4.087436  | 1.452317  |
| C  | -1.222657 | 4.168038  | 1.404937  |
| C  | -1.317727 | 1.461619  | 0.159050  |
| C  | -1.803407 | 0.508955  | 1.061121  |
| C  | -3.003224 | -0.153582 | 0.830362  |
| Br | -3.584901 | -1.427989 | 2.112034  |
| C  | -3.776651 | 0.102634  | -0.314419 |
| N  | -4.980607 | -0.591668 | -0.503092 |
| C  | -5.859852 | -0.466444 | -1.529168 |

|   |           |           |           |
|---|-----------|-----------|-----------|
| C | -7.098412 | -1.390350 | -1.398909 |
| F | -8.196737 | -0.655581 | -1.295803 |
| F | -7.199876 | -2.161443 | -2.470156 |
| F | -7.031602 | -2.185996 | -0.320106 |
| O | -5.782611 | 0.263344  | -2.486005 |
| C | -3.294005 | 1.053761  | -1.220812 |
| C | -2.092580 | 1.709372  | -0.978212 |
| C | 1.467094  | 0.234290  | 1.066586  |
| C | 2.627579  | -0.522640 | 0.950969  |
| C | 3.604511  | -0.193580 | 0.003350  |
| N | 4.791788  | -0.923453 | -0.154524 |
| C | 5.200202  | -2.009361 | 0.549345  |
| C | 6.577567  | -2.558998 | 0.096048  |
| F | 7.107937  | -1.845165 | -0.909187 |
| F | 6.447834  | -3.811027 | -0.316529 |
| F | 7.428685  | -2.529811 | 1.110682  |
| O | 4.626043  | -2.566208 | 1.451795  |
| H | 2.052602  | 2.523237  | -1.355416 |
| H | 0.042163  | 2.884828  | -0.533496 |
| H | 0.033351  | 3.354650  | 3.711160  |
| H | 0.792489  | 1.884631  | 3.080731  |
| H | -0.989864 | 2.046654  | 3.109103  |
| H | 1.358980  | 4.579037  | 0.469684  |
| H | 2.177618  | 3.477647  | 1.604087  |
| H | 1.269211  | 4.876193  | 2.219994  |
| H | -1.208760 | 4.943631  | 2.185959  |
| H | -2.167972 | 3.612953  | 1.498020  |
| H | -1.225420 | 4.676622  | 0.427393  |
| H | -1.258313 | 0.265279  | 1.970456  |
| H | -5.214022 | -1.267182 | 0.218940  |
| H | -3.873664 | 1.269980  | -2.115137 |
| H | -1.749384 | 2.445461  | -1.709080 |
| H | 0.742376  | -0.075310 | 1.817890  |
| H | 2.791845  | -1.383002 | 1.595529  |
| H | 5.415286  | -0.590523 | -0.884135 |

-----  
3-conf09

- Electronic Energy (Eh): -6818.72878622

- Cartesian Coordinates:

|    |           |           |           |
|----|-----------|-----------|-----------|
| Br | -4.301142 | 1.314754  | 2.178639  |
| C  | -3.280426 | 0.807536  | 0.660951  |
| C  | -2.090141 | 1.479046  | 0.408387  |
| C  | -1.288469 | 1.159353  | -0.691888 |
| C  | -0.000728 | 1.946056  | -0.895344 |
| C  | 0.047392  | 2.834619  | -2.193274 |
| C  | 1.276811  | 3.751279  | -2.100989 |
| C  | 0.139726  | 2.034158  | -3.497883 |
| C  | -1.217795 | 3.703620  | -2.226021 |
| C  | 1.253478  | 1.115537  | -0.656674 |
| C  | 2.197684  | 1.579353  | 0.264383  |
| C  | 3.373898  | 0.881440  | 0.510427  |
| Br | 4.598478  | 1.590213  | 1.775926  |
| C  | 3.658179  | -0.322675 | -0.154542 |
| N  | 4.856661  | -0.996767 | 0.122279  |
| C  | 5.308788  | -2.150390 | -0.431241 |
| C  | 6.691845  | -2.596581 | 0.109900  |
| F  | 7.573267  | -2.621734 | -0.879368 |
| F  | 7.160505  | -1.771621 | 1.059293  |
| F  | 6.601054  | -3.810101 | 0.631647  |
| O  | 4.770383  | -2.831109 | -1.268322 |
| C  | 2.710839  | -0.795907 | -1.070865 |
| C  | 1.538239  | -0.087877 | -1.309016 |
| C  | -1.738793 | 0.129545  | -1.525654 |
| C  | -2.927497 | -0.549706 | -1.283879 |
| C  | -3.726905 | -0.223546 | -0.181455 |
| N  | -4.933920 | -0.876797 | 0.107358  |
| C  | -5.527973 | -1.874583 | -0.594925 |
| C  | -6.866560 | -2.354855 | 0.023262  |
| F  | -6.787378 | -3.642841 | 0.321365  |

|   |           |           |           |
|---|-----------|-----------|-----------|
| F | -7.851379 | -2.177029 | -0.844805 |
| F | -7.179722 | -1.688875 | 1.145710  |
| O | -5.138171 | -2.401682 | -1.606981 |
| H | -1.783725 | 2.274448  | 1.090513  |
| H | -0.001897 | 2.690696  | -0.084513 |
| H | 1.291147  | 4.453414  | -2.948484 |
| H | 2.215819  | 3.178574  | -2.124931 |
| H | 1.266489  | 4.347714  | -1.174395 |
| H | 1.014445  | 1.367324  | -3.510637 |
| H | 0.246654  | 2.727606  | -4.346301 |
| H | -0.764559 | 1.438773  | -3.685822 |
| H | -1.181139 | 4.400234  | -3.077575 |
| H | -1.315443 | 4.303077  | -1.306449 |
| H | -2.127659 | 3.093814  | -2.328569 |
| H | 2.018509  | 2.511088  | 0.804244  |
| H | 5.452243  | -0.559968 | 0.819806  |
| H | 2.907809  | -1.729302 | -1.593014 |
| H | 0.834504  | -0.508759 | -2.025616 |
| H | -1.164538 | -0.167300 | -2.401716 |
| H | -3.253594 | -1.344791 | -1.950343 |
| H | -5.415380 | -0.555937 | 0.942468  |

-----  
3-conf10

- Electronic Energy (Eh): -6818.72906228

- Cartesian Coordinates:

|    |           |           |           |
|----|-----------|-----------|-----------|
| Br | 2.941515  | -1.325007 | 1.937444  |
| C  | 2.706155  | -0.081672 | 0.521744  |
| C  | 1.530743  | 0.658867  | 0.485217  |
| C  | 1.297384  | 1.592490  | -0.528383 |
| C  | 0.039397  | 2.448124  | -0.602120 |
| C  | 0.082277  | 3.736853  | 0.300542  |
| C  | 1.287338  | 4.585658  | -0.133879 |
| C  | -1.202379 | 4.540054  | 0.053697  |
| C  | 0.218076  | 3.449286  | 1.801504  |
| C  | -1.240139 | 1.627448  | -0.524140 |
| C  | -1.709733 | 1.014239  | 0.642583  |
| C  | -2.881236 | 0.266231  | 0.640679  |
| Br | -3.440813 | -0.527324 | 2.272395  |
| C  | -3.641440 | 0.093467  | -0.528048 |
| N  | -4.816299 | -0.670961 | -0.480022 |
| C  | -5.672769 | -0.943354 | -1.496940 |
| C  | -6.868098 | -1.836995 | -1.075920 |
| F  | -8.008217 | -1.220846 | -1.346900 |
| F  | -6.830840 | -2.980381 | -1.744683 |
| F  | -6.854115 | -2.124871 | 0.235063  |
| O  | -5.598789 | -0.581568 | -2.644767 |
| C  | -3.175973 | 0.705250  | -1.697891 |
| C  | -2.003094 | 1.450965  | -1.682543 |
| C  | 2.287666  | 1.734666  | -1.504878 |
| C  | 3.467141  | 0.999628  | -1.480172 |
| C  | 3.702001  | 0.072591  | -0.457689 |
| N  | 4.870540  | -0.699325 | -0.379819 |
| C  | 5.936595  | -0.680586 | -1.219170 |
| C  | 7.053765  | -1.680592 | -0.823474 |
| F  | 8.188211  | -1.028833 | -0.617489 |
| F  | 7.236686  | -2.558347 | -1.798795 |
| F  | 6.758779  | -2.361172 | 0.295116  |
| O  | 6.095642  | 0.003064  | -2.199740 |
| H  | 0.791905  | 0.482279  | 1.264897  |
| H  | 0.039198  | 2.856719  | -1.624368 |
| H  | 1.293916  | 5.541553  | 0.411697  |
| H  | 1.250267  | 4.816888  | -1.210538 |
| H  | 2.241057  | 4.077148  | 0.071096  |
| H  | -2.096546 | 3.990070  | 0.382459  |
| H  | -1.326662 | 4.775359  | -1.015557 |
| H  | -1.170179 | 5.492184  | 0.605315  |
| H  | 0.358118  | 4.396600  | 2.344602  |
| H  | 1.090119  | 2.815681  | 2.022055  |
| H  | -0.680509 | 2.976634  | 2.221691  |

|   |           |           |           |
|---|-----------|-----------|-----------|
| H | -1.174731 | 1.113147  | 1.584865  |
| H | -5.047402 | -1.061786 | 0.428799  |
| H | -3.746818 | 0.587072  | -2.615959 |
| H | -1.672356 | 1.912633  | -2.615938 |
| H | 2.138506  | 2.447352  | -2.319313 |
| H | 4.220327  | 1.131609  | -2.253391 |
| H | 4.916146  | -1.345185 | 0.403073  |

-----  
3-conf11

- Electronic Energy (Eh): -6818.72898858

- Cartesian Coordinates:

|    |           |           |           |
|----|-----------|-----------|-----------|
| Br | 3.146079  | -1.880638 | 1.751049  |
| C  | 2.811468  | -0.323614 | 0.717206  |
| C  | 1.623109  | 0.364692  | 0.930013  |
| C  | 1.318272  | 1.519325  | 0.203823  |
| C  | 0.044084  | 2.326188  | 0.415103  |
| C  | 0.112006  | 3.335776  | 1.620801  |
| C  | 1.276260  | 4.306160  | 1.367589  |
| C  | -1.198594 | 4.134408  | 1.653727  |
| C  | 0.332498  | 2.670541  | 2.985235  |
| C  | -1.217030 | 1.476135  | 0.338871  |
| C  | -2.036115 | 1.611266  | -0.786522 |
| C  | -3.199358 | 0.865116  | -0.933725 |
| Br | -4.246403 | 1.120028  | -2.496041 |
| C  | -3.600175 | -0.058345 | 0.045463  |
| N  | -4.780796 | -0.792451 | -0.139574 |
| C  | -5.325561 | -1.714554 | 0.693760  |
| C  | -6.643386 | -2.331606 | 0.157867  |
| F  | -7.625648 | -2.110204 | 1.018242  |
| F  | -7.006040 | -1.814376 | -1.026311 |
| F  | -6.496784 | -3.639262 | 0.004264  |
| O  | -4.906162 | -2.088029 | 1.760943  |
| C  | -2.784246 | -0.198693 | 1.174602  |
| C  | -1.622907 | 0.553579  | 1.309997  |
| C  | 2.250735  | 1.938020  | -0.749820 |
| C  | 3.442673  | 1.258406  | -0.972560 |
| C  | 3.749493  | 0.108018  | -0.236149 |
| N  | 4.935009  | -0.619971 | -0.415416 |
| C  | 5.953817  | -0.351640 | -1.270492 |
| C  | 7.117538  | -1.373106 | -1.186842 |
| F  | 8.228272  | -0.757236 | -0.808259 |
| F  | 7.318779  | -1.924490 | -2.373734 |
| F  | 6.871863  | -2.357923 | -0.308799 |
| O  | 6.044680  | 0.563284  | -2.050863 |
| H  | 0.931073  | -0.027124 | 1.673247  |
| H  | -0.014830 | 2.988096  | -0.462625 |
| H  | 1.297546  | 5.083953  | 2.146050  |
| H  | 1.174963  | 4.811994  | 0.393925  |
| H  | 2.248299  | 3.791286  | 1.382702  |
| H  | -2.062931 | 3.490349  | 1.873191  |
| H  | -1.386509 | 4.633328  | 0.689287  |
| H  | -1.152380 | 4.913088  | 2.430477  |
| H  | 0.466595  | 3.447225  | 3.753896  |
| H  | 1.235865  | 2.042681  | 2.995990  |
| H  | -0.526916 | 2.061713  | 3.297969  |
| H  | -1.764429 | 2.317099  | -1.573826 |
| H  | -5.282309 | -0.603172 | -1.002542 |
| H  | -3.075680 | -0.907104 | 1.946551  |
| H  | -1.035249 | 0.403487  | 2.214372  |
| H  | 2.044889  | 2.831100  | -1.344469 |
| H  | 4.150051  | 1.607940  | -1.720941 |
| H  | 5.034211  | -1.444678 | 0.169475  |

-----  
3-conf12

- Electronic Energy (Eh): -6818.72892945

- Cartesian Coordinates:

|    |          |          |           |
|----|----------|----------|-----------|
| Br | 4.699325 | 1.413516 | -2.090466 |
| C  | 3.385487 | 0.904996 | -0.818292 |

|    |           |           |           |
|----|-----------|-----------|-----------|
| C  | 2.227442  | 1.666907  | -0.721545 |
| C  | 1.220139  | 1.350060  | 0.195079  |
| C  | -0.010518 | 2.245366  | 0.264263  |
| C  | 0.019394  | 3.297486  | 1.434281  |
| C  | 0.022381  | 2.676715  | 2.836814  |
| C  | 1.289131  | 4.148872  | 1.281512  |
| C  | -1.208196 | 4.208101  | 1.290893  |
| C  | -1.316573 | 1.480232  | 0.105240  |
| C  | -1.831609 | 0.600683  | 1.063736  |
| C  | -3.030021 | -0.071018 | 0.852920  |
| Br | -3.651307 | -1.243875 | 2.210755  |
| C  | -3.772954 | 0.102798  | -0.326920 |
| N  | -4.976471 | -0.597716 | -0.494008 |
| C  | -5.823050 | -0.553732 | -1.553718 |
| C  | -7.061585 | -1.473259 | -1.395311 |
| F  | -7.071689 | -2.119858 | -0.219183 |
| F  | -8.169779 | -0.752436 | -1.474626 |
| F  | -7.072728 | -2.381118 | -2.360115 |
| O  | -5.713402 | 0.097154  | -2.562888 |
| C  | -3.261607 | 0.981514  | -1.289005 |
| C  | -2.061931 | 1.647153  | -1.065953 |
| C  | 1.423186  | 0.224946  | 0.999837  |
| C  | 2.576850  | -0.546040 | 0.911997  |
| C  | 3.587245  | -0.219279 | -0.000711 |
| N  | 4.769316  | -0.963142 | -0.130174 |
| C  | 5.142601  | -2.060843 | 0.574920  |
| C  | 6.526388  | -2.623195 | 0.158212  |
| F  | 7.347857  | -2.610265 | 1.197381  |
| F  | 7.093825  | -1.908776 | -0.826202 |
| F  | 6.394895  | -3.870901 | -0.266586 |
| O  | 4.534624  | -2.618875 | 1.454190  |
| H  | 2.112877  | 2.531719  | -1.377746 |
| H  | 0.047706  | 2.873464  | -0.637976 |
| H  | 0.146924  | 3.471180  | 3.588735  |
| H  | 0.852788  | 1.967962  | 2.972134  |
| H  | -0.922943 | 2.166952  | 3.069723  |
| H  | 1.347290  | 4.610539  | 0.282611  |
| H  | 2.201382  | 3.552925  | 1.433063  |
| H  | 1.292693  | 4.961336  | 2.024033  |
| H  | -1.182306 | 5.007052  | 2.047741  |
| H  | -2.146734 | 3.649423  | 1.422407  |
| H  | -1.237492 | 4.686541  | 0.298681  |
| H  | -1.311053 | 0.424364  | 2.002622  |
| H  | -5.238207 | -1.207656 | 0.275080  |
| H  | -3.817789 | 1.133538  | -2.211042 |
| H  | -1.695722 | 2.324911  | -1.840774 |
| H  | 0.667892  | -0.084498 | 1.720862  |
| H  | 2.709097  | -1.416088 | 1.550836  |
| H  | 5.418644  | -0.631941 | -0.837753 |

-----  
3-conf13

- Electronic Energy (Eh): -6818.728776270001

- Cartesian Coordinates:

|    |           |           |           |
|----|-----------|-----------|-----------|
| Br | -4.281118 | 1.281783  | 2.207652  |
| C  | -3.272920 | 0.800720  | 0.673188  |
| C  | -2.082951 | 1.474163  | 0.424323  |
| C  | -1.290121 | 1.173121  | -0.687551 |
| C  | -0.000681 | 1.958777  | -0.884089 |
| C  | 0.054191  | 2.854270  | -2.177057 |
| C  | 0.160710  | 2.061023  | -3.485116 |
| C  | -1.213335 | 3.719582  | -2.215092 |
| C  | 1.279798  | 3.774681  | -2.070732 |
| C  | 1.250332  | 1.122772  | -0.647607 |
| C  | 2.203920  | 1.586809  | 0.263570  |
| C  | 3.377575  | 0.883171  | 0.505409  |
| Br | 4.615802  | 1.592369  | 1.757346  |
| C  | 3.649456  | -0.326980 | -0.153836 |
| N  | 4.845833  | -1.006549 | 0.118561  |
| C  | 5.287419  | -2.165992 | -0.431270 |

|   |           |           |           |
|---|-----------|-----------|-----------|
| C | 6.672208  | -2.616417 | 0.101924  |
| F | 7.150699  | -1.790708 | 1.045761  |
| F | 6.579984  | -3.828036 | 0.627639  |
| F | 7.546871  | -2.647922 | -0.893228 |
| O | 4.739144  | -2.848566 | -1.260403 |
| C | 2.692266  | -0.800583 | -1.059728 |
| C | 1.522283  | -0.086851 | -1.293697 |
| C | -1.749308 | 0.160327  | -1.537230 |
| C | -2.937908 | -0.520520 | -1.299412 |
| C | -3.728166 | -0.213375 | -0.185003 |
| N | -4.934580 | -0.869098 | 0.100657  |
| C | -5.534806 | -1.854320 | -0.614004 |
| C | -6.868725 | -2.344673 | 0.006407  |
| F | -6.783818 | -3.635346 | 0.291598  |
| F | -7.858604 | -2.161680 | -0.854593 |
| F | -7.177996 | -1.690772 | 1.137008  |
| O | -5.152794 | -2.364756 | -1.637507 |
| H | -1.769472 | 2.255882  | 1.118948  |
| H | -0.002011 | 2.698768  | -0.068975 |
| H | 0.280402  | 2.759024  | -4.328076 |
| H | -0.742650 | 1.469523  | -3.688644 |
| H | 1.033471  | 1.391455  | -3.490395 |
| H | -1.319968 | 4.313558  | -1.292968 |
| H | -2.120530 | 3.107684  | -2.328040 |
| H | -1.172124 | 4.421013  | -3.062488 |
| H | 1.297858  | 4.481238  | -2.914461 |
| H | 2.221040  | 3.205520  | -2.090960 |
| H | 1.260511  | 4.366394  | -1.141266 |
| H | 2.034308  | 2.523041  | 0.798702  |
| H | 5.448654  | -0.569136 | 0.809460  |
| H | 2.879535  | -1.738833 | -1.576743 |
| H | 0.809296  | -0.508186 | -2.000968 |
| H | -1.182415 | -0.120942 | -2.423192 |
| H | -3.271079 | -1.302102 | -1.978256 |
| H | -5.409970 | -0.561190 | 0.944079  |

-----  
8-conf01

- Electronic Energy (Eh): -7051.02245105

- Cartesian Coordinates:

|    |           |           |           |
|----|-----------|-----------|-----------|
| Br | 2.909749  | -1.649341 | 2.277826  |
| C  | 2.643064  | -0.729842 | 0.638333  |
| C  | 1.512316  | 0.063514  | 0.502251  |
| C  | 1.267643  | 0.763508  | -0.682088 |
| C  | 0.045607  | 1.657070  | -0.826311 |
| C  | -1.229513 | 0.837636  | -0.700947 |
| C  | -1.850639 | 0.601038  | 0.527870  |
| C  | -2.986777 | -0.195110 | 0.611336  |
| Br | -3.774399 | -0.463656 | 2.317976  |
| C  | -3.551887 | -0.787171 | -0.531124 |
| N  | -4.700034 | -1.582212 | -0.397717 |
| C  | -5.388318 | -2.220353 | -1.377662 |
| C  | -6.617931 | -3.009056 | -0.857423 |
| F  | -7.723677 | -2.532233 | -1.410199 |
| F  | -6.499031 | -4.288896 | -1.176115 |
| F  | -6.753280 | -2.925293 | 0.475409  |
| O  | -5.153124 | -2.233961 | -2.560303 |
| C  | -2.931945 | -0.545544 | -1.763771 |
| C  | -1.795844 | 0.251831  | -1.834956 |
| C  | 2.189892  | 0.629959  | -1.719517 |
| C  | 3.326058  | -0.163972 | -1.595041 |
| C  | 3.575874  | -0.860761 | -0.407436 |
| N  | 4.703118  | -1.675819 | -0.224115 |
| C  | 5.708360  | -1.914178 | -1.103464 |
| C  | 6.794940  | -2.875248 | -0.555663 |
| F  | 6.532173  | -3.284927 | 0.695240  |
| F  | 7.971041  | -2.265708 | -0.546679 |
| F  | 6.876285  | -3.948399 | -1.327933 |
| O  | 5.837271  | -1.474328 | -2.218996 |
| H  | 0.811851  | 0.126186  | 1.336576  |

|   |           |           |           |
|---|-----------|-----------|-----------|
| H | 0.064137  | 2.032091  | -1.859311 |
| H | -1.462862 | 1.049278  | 1.443662  |
| H | -5.051316 | -1.687179 | 0.549683  |
| H | -3.356324 | -0.990984 | -2.660548 |
| H | -1.334551 | 0.417739  | -2.811676 |
| H | 2.025853  | 1.163273  | -2.659011 |
| H | 4.034426  | -0.253798 | -2.415301 |
| H | 4.766741  | -2.137530 | 0.678581  |
| C | 0.106950  | 2.872810  | 0.125387  |
| H | 0.085033  | 2.482717  | 1.159182  |
| C | -1.089752 | 3.837728  | -0.039341 |
| C | 1.413454  | 3.687928  | -0.009414 |
| H | -2.033112 | 3.275939  | 0.038004  |
| C | -1.029725 | 4.547137  | -1.401977 |
| C | -1.037910 | 4.891331  | 1.078114  |
| C | 2.278239  | 3.014696  | 0.094871  |
| C | 1.474253  | 4.398824  | -1.370859 |
| C | 1.459439  | 4.742086  | 1.107930  |
| H | -1.896540 | 5.220959  | -1.501314 |
| H | -1.109090 | 3.821643  | -2.228117 |
| C | 0.275774  | 5.349152  | -1.513861 |
| H | -1.104549 | 4.400437  | 2.063679  |
| H | -1.908060 | 5.563597  | 0.996810  |
| C | 0.264884  | 5.697073  | 0.974716  |
| H | 1.486016  | 3.669865  | -2.197448 |
| H | 2.417307  | 4.964651  | -1.446925 |
| H | 1.443861  | 4.247699  | 2.093693  |
| H | 2.405035  | 5.306007  | 1.048466  |
| H | 0.317744  | 5.853443  | -2.492485 |
| C | 0.323467  | 6.397943  | -0.391496 |
| H | 0.300144  | 6.449466  | 1.778755  |
| H | 1.247341  | 6.994868  | -0.470958 |
| H | -0.521303 | 7.099456  | -0.493728 |

-----  
8-conf02

- Electronic Energy (Eh): -7051.02238132

- Cartesian Coordinates:

|    |           |           |           |
|----|-----------|-----------|-----------|
| Br | -3.795870 | -1.172900 | 2.804956  |
| C  | -3.009626 | -0.438924 | 1.241217  |
| C  | -1.868666 | 0.342389  | 1.377230  |
| C  | -1.246642 | 0.910691  | 0.263473  |
| C  | 0.031539  | 1.711937  | 0.458957  |
| C  | 1.246396  | 0.799983  | 0.388649  |
| C  | 1.543826  | 0.084797  | -0.774377 |
| C  | 2.669612  | -0.724237 | -0.842565 |
| Br | 3.010913  | -1.663605 | -2.456594 |
| C  | 3.543941  | -0.856244 | 0.252421  |
| N  | 4.668852  | -1.686700 | 0.136040  |
| C  | 5.622252  | -1.930938 | 1.069698  |
| C  | 6.727628  | -2.904801 | 0.585757  |
| F  | 7.905323  | -2.298453 | 0.617093  |
| F  | 6.772125  | -3.964466 | 1.379033  |
| F  | 6.517864  | -3.335115 | -0.668108 |
| O  | 5.695734  | -1.485704 | 2.188179  |
| C  | 3.240882  | -0.144646 | 1.418595  |
| C  | 2.110348  | 0.665006  | 1.474960  |
| C  | -1.816740 | 0.669740  | -0.989150 |
| C  | -2.957838 | -0.110638 | -1.137452 |
| C  | -3.578483 | -0.684052 | -0.020518 |
| N  | -4.731501 | -1.477906 | -0.112807 |
| C  | -5.422739 | -1.813892 | -1.230850 |
| C  | -6.656757 | -2.709863 | -0.949838 |
| F  | -7.758131 | -2.098626 | -1.360368 |
| F  | -6.800593 | -2.988157 | 0.355238  |
| F  | -6.537196 | -3.856918 | -1.601214 |
| O  | -5.186268 | -1.499573 | -2.370945 |
| H  | -1.454895 | 0.505949  | 2.374490  |
| H  | -0.000935 | 2.094790  | 1.488859  |
| H  | 0.888977  | 0.148214  | -1.644896 |

|   |           |           |           |
|---|-----------|-----------|-----------|
| H | 4.774022  | -2.156646 | -0.758532 |
| H | 3.903670  | -0.235381 | 2.276015  |
| H | 1.904374  | 1.210575  | 2.399080  |
| H | -1.376234 | 1.107768  | -1.886840 |
| H | -3.387285 | -0.283743 | -2.121447 |
| H | -5.084226 | -1.839427 | 0.768697  |
| C | 0.164488  | 2.920309  | -0.494936 |
| H | 0.193708  | 2.523179  | -1.525616 |
| C | 1.473889  | 3.716065  | -0.290486 |
| C | -1.024184 | 3.904377  | -0.403188 |
| H | 2.332617  | 3.029107  | -0.341682 |
| C | 1.468771  | 4.434956  | 1.068175  |
| C | 1.599954  | 4.762097  | -1.409148 |
| H | -1.970105 | 3.356455  | -0.531221 |
| C | -1.030253 | 4.621601  | 0.956602  |
| C | -0.892520 | 4.949948  | -1.521704 |
| H | 2.414766  | 4.986807  | 1.194201  |
| H | 1.422600  | 3.711621  | 1.898515  |
| C | 0.279114  | 5.404529  | 1.137686  |
| H | 1.632691  | 4.261686  | -2.391408 |
| H | 2.549381  | 5.311836  | -1.299047 |
| C | 0.414842  | 5.736128  | -1.349404 |
| H | -1.166915 | 3.902673  | 1.781078  |
| H | -1.890906 | 5.308926  | 1.003274  |
| H | -0.911278 | 4.453781  | -2.506639 |
| H | -1.755175 | 5.636090  | -1.493551 |
| H | 0.273592  | 5.914581  | 2.114237  |
| C | 0.406852  | 6.445016  | 0.013890  |
| H | 0.507315  | 6.482612  | -2.154403 |
| H | -0.431267 | 7.160071  | 0.063944  |
| H | 1.333967  | 7.028217  | 0.142500  |

-----  
8-conf03

- Electronic Energy (Eh): -7051.02217156  
- Cartesian Coordinates:

|    |           |           |           |
|----|-----------|-----------|-----------|
| Br | -3.798073 | -1.147875 | 2.662009  |
| C  | -3.061172 | -0.457575 | 1.054802  |
| C  | -1.899419 | 0.301115  | 1.130878  |
| C  | -1.311526 | 0.837265  | -0.016669 |
| C  | -0.012405 | 1.618017  | 0.112623  |
| C  | 1.182562  | 0.687508  | -0.023143 |
| C  | 2.075605  | 0.531245  | 1.036552  |
| C  | 3.186438  | -0.298407 | 0.918910  |
| Br | 4.357137  | -0.455945 | 2.404730  |
| C  | 3.444694  | -1.005374 | -0.266468 |
| N  | 4.576652  | -1.830869 | -0.342784 |
| C  | 4.996382  | -2.573027 | -1.398326 |
| C  | 6.299646  | -3.365360 | -1.118059 |
| F  | 6.767740  | -3.158252 | 0.122823  |
| F  | 6.075610  | -4.663337 | -1.258178 |
| F  | 7.240975  | -2.999660 | -1.975373 |
| O  | 4.482156  | -2.675134 | -2.484278 |
| C  | 2.542850  | -0.850673 | -1.329377 |
| C  | 1.436877  | -0.020970 | -1.200457 |
| C  | -1.937186 | 0.588055  | -1.240854 |
| C  | -3.099453 | -0.169543 | -1.329142 |
| C  | -3.686058 | -0.711088 | -0.178239 |
| N  | -4.857932 | -1.481667 | -0.210366 |
| C  | -5.602856 | -1.818054 | -1.293385 |
| C  | -6.839923 | -2.686857 | -0.947863 |
| F  | -6.936422 | -2.939569 | 0.366831  |
| F  | -6.765711 | -3.847232 | -1.582206 |
| F  | -7.946206 | -2.063716 | -1.325747 |
| O  | -5.409625 | -1.523050 | -2.446627 |
| H  | -1.442942 | 0.472834  | 2.107932  |
| H  | 0.012366  | 2.000694  | 1.142729  |
| H  | 1.912765  | 1.067191  | 1.973787  |
| H  | 5.146828  | -1.868872 | 0.497141  |
| H  | 2.725553  | -1.393836 | -2.253696 |

|   |           |           |           |
|---|-----------|-----------|-----------|
| H | 0.753822  | 0.066180  | -2.047826 |
| H | -1.524146 | 1.000773  | -2.163146 |
| H | -3.572164 | -0.349474 | -2.291869 |
| H | -5.180926 | -1.823563 | 0.690158  |
| C | 0.087365  | 2.825923  | -0.845713 |
| H | 0.055938  | 2.430747  | -1.876815 |
| C | 1.416673  | 3.603052  | -0.709658 |
| C | -1.081333 | 3.825421  | -0.688143 |
| H | 2.261729  | 2.904516  | -0.809512 |
| C | 1.494268  | 4.317253  | 0.649313  |
| C | 1.496509  | 4.651318  | -1.830640 |
| H | -2.039803 | 3.290086  | -0.767067 |
| C | -1.004943 | 4.538235  | 0.671973  |
| C | -0.995664 | 4.873157  | -1.809034 |
| H | 2.452921  | 4.856224  | 0.725932  |
| H | 1.482990  | 3.591887  | 1.479271  |
| C | 0.323149  | 5.302280  | 0.785322  |
| H | 1.469500  | 4.153796  | -2.814472 |
| H | 2.457892  | 5.187864  | -1.770447 |
| C | 0.329751  | 5.640960  | -1.704510 |
| H | -1.108297 | 3.818929  | 1.500984  |
| H | -1.851864 | 5.237666  | 0.765908  |
| H | -1.073665 | 4.380887  | -2.792954 |
| H | -1.846093 | 5.570778  | -1.732738 |
| H | 0.376779  | 5.808840  | 1.762266  |
| C | 0.404723  | 6.345009  | -0.340734 |
| H | 0.389312  | 6.389034  | -2.511125 |
| H | -0.419583 | 7.071174  | -0.243587 |
| H | 1.345353  | 6.915116  | -0.260549 |

-----  
8-conf04

- Electronic Energy (Eh): -7051.02245124  
- Cartesian Coordinates:

|    |           |           |           |
|----|-----------|-----------|-----------|
| Br | 2.911253  | -1.648384 | 2.277999  |
| C  | 2.644008  | -0.729142 | 0.638453  |
| C  | 1.512908  | 0.063772  | 0.502475  |
| C  | 1.267801  | 0.763580  | -0.681850 |
| C  | 0.045459  | 1.656734  | -0.826024 |
| C  | -1.229469 | 0.837055  | -0.700607 |
| C  | -1.850196 | 0.599833  | 0.528288  |
| C  | -2.986351 | -0.196306 | 0.611715  |
| Br | -3.773334 | -0.465707 | 2.318524  |
| C  | -3.551893 | -0.787749 | -0.530856 |
| N  | -4.699943 | -1.582885 | -0.397539 |
| C  | -5.389785 | -2.218720 | -1.377922 |
| C  | -6.618365 | -3.008982 | -0.857596 |
| F  | -6.496115 | -4.289306 | -1.173587 |
| F  | -6.755405 | -2.922981 | 0.474911  |
| F  | -7.724429 | -2.535867 | -1.412626 |
| O  | -5.156084 | -2.230011 | -2.560880 |
| C  | -2.932260 | -0.545601 | -1.763555 |
| C  | -1.796157 | 0.251763  | -1.834705 |
| C  | 2.190019  | 0.630360  | -1.719391 |
| C  | 3.326513  | -0.163072 | -1.595008 |
| C  | 3.576744  | -0.859736 | -0.407383 |
| N  | 4.704428  | -1.674183 | -0.224094 |
| C  | 5.708459  | -1.914099 | -1.104416 |
| C  | 6.795665  | -2.874404 | -0.556488 |
| F  | 7.971616  | -2.264536 | -0.548889 |
| F  | 6.876774  | -3.948242 | -1.327818 |
| F  | 6.533865  | -3.282987 | 0.694972  |
| O  | 5.836017  | -1.475889 | -2.220745 |
| H  | 0.812560  | 0.126166  | 1.336917  |
| H  | 0.063822  | 2.031743  | -1.859028 |
| H  | -1.462174 | 1.047584  | 1.444215  |
| H  | -5.050684 | -1.688728 | 0.549963  |
| H  | -3.356959 | -0.990493 | -2.660459 |
| H  | -1.335181 | 0.418118  | -2.811499 |
| H  | 2.025625  | 1.163584  | -2.658873 |



|   |           |           |           |
|---|-----------|-----------|-----------|
| H | 4.034758  | -0.252801 | -2.415387 |
| H | 4.768852  | -2.135012 | 0.678998  |
| C | 0.106478  | 2.872569  | 0.125631  |
| H | 0.085069  | 2.482486  | 1.159442  |
| C | -1.090730 | 3.836899  | -0.038775 |
| C | 1.412555  | 3.688340  | -0.009609 |
| H | -2.033811 | 3.274688  | 0.038887  |
| C | -1.031453 | 4.546235  | -1.401467 |
| C | -1.039066 | 4.890563  | 1.078622  |
| H | 2.277710  | 3.015553  | 0.094437  |
| C | 1.472601  | 4.399248  | -1.371084 |
| C | 1.458359  | 4.742555  | 1.107689  |
| H | -1.898650 | 5.219586  | -1.500642 |
| H | -1.110639 | 3.820608  | -2.227507 |
| C | 0.273588  | 5.348944  | -1.513774 |
| H | -1.105171 | 4.399664  | 2.064218  |
| H | -1.909570 | 5.562400  | 0.997556  |
| C | 0.263293  | 5.696948  | 0.974804  |
| H | 1.484522  | 3.670301  | -2.197680 |
| H | 2.415344  | 4.965560  | -1.447415 |
| H | 1.443322  | 4.248189  | 2.093468  |
| H | 2.403658  | 5.306940  | 1.047922  |
| H | 0.315006  | 5.853223  | -2.492426 |
| C | 0.321083  | 6.397797  | -0.391457 |
| H | 0.298427  | 6.449395  | 1.778798  |
| H | 1.244619  | 6.995198  | -0.471244 |
| H | -0.524087 | 7.098862  | -0.493443 |

-----  
8-conf05

- Electronic Energy (Eh): -7051.02233886  
- Cartesian Coordinates:

|    |           |           |           |
|----|-----------|-----------|-----------|
| Br | 3.992789  | -0.520816 | 2.459846  |
| C  | 3.127247  | -0.242107 | 0.793152  |
| C  | 1.971684  | 0.529570  | 0.771532  |
| C  | 1.294016  | 0.772359  | -0.425795 |
| C  | -0.000197 | 1.569026  | -0.483336 |
| C  | -1.197039 | 0.654115  | -0.275521 |
| C  | -2.149176 | 0.501336  | -1.282992 |
| C  | -3.261631 | -0.313570 | -1.097369 |
| Br | -4.514622 | -0.468078 | -2.514613 |
| C  | -3.462408 | -1.008540 | 0.106127  |
| N  | -4.598678 | -1.818750 | 0.251338  |
| C  | -4.967987 | -2.548511 | 1.333906  |
| C  | -6.295866 | -3.324072 | 1.134009  |
| F  | -6.083714 | -4.623497 | 1.278442  |
| F  | -7.183894 | -2.933675 | 2.036317  |
| F  | -6.827456 | -3.124458 | -0.082155 |
| O  | -4.394772 | -2.650551 | 2.390015  |
| C  | -2.501434 | -0.857521 | 1.116300  |
| C  | -1.394479 | -0.042600 | 0.919609  |
| C  | 1.823984  | 0.218091  | -1.592589 |
| C  | 2.978917  | -0.555166 | -1.583325 |
| C  | 3.655742  | -0.802907 | -0.382360 |
| N  | 4.825375  | -1.574354 | -0.311457 |
| C  | 5.487291  | -2.176549 | -1.331385 |
| C  | 6.754071  | -2.946988 | -0.877362 |
| F  | 6.647865  | -4.223968 | -1.211942 |
| F  | 6.944670  | -2.881281 | 0.449633  |
| F  | 7.825027  | -2.438270 | -1.468786 |
| O  | 5.204588  | -2.172088 | -2.503713 |
| H  | 1.613114  | 0.953596  | 1.710349  |
| H  | -0.075883 | 1.946142  | -1.512932 |
| H  | -2.031658 | 1.028206  | -2.232057 |
| H  | -5.214605 | -1.854875 | -0.555838 |
| H  | -2.639261 | -1.391524 | 2.053606  |
| H  | -0.665169 | 0.042079  | 1.727814  |
| H  | 1.318760  | 0.390467  | -2.546226 |
| H  | 3.374333  | -0.975977 | -2.504884 |
| H  | 5.217804  | -1.689814 | 0.618485  |

|   |           |          |           |
|---|-----------|----------|-----------|
| C | -0.033221 | 2.782230 | 0.472793  |
| H | 0.044686  | 2.391036 | 1.503250  |
| C | -1.356645 | 3.577933 | 0.401632  |
| C | 1.139694  | 3.764738 | 0.251882  |
| H | -2.205167 | 2.891736 | 0.547232  |
| C | -1.493393 | 4.288504 | -0.954527 |
| C | -1.364515 | 4.630826 | 1.521074  |
| H | 2.093702  | 3.216684 | 0.283575  |
| C | 1.003979  | 4.473498 | -1.105561 |
| C | 1.126034  | 4.817085 | 1.371636  |
| H | -2.447055 | 4.840746 | -0.984347 |
| H | -1.534516 | 3.560208 | -1.780940 |
| C | -0.317004 | 5.256285 | -1.153917 |
| H | -1.294428 | 4.136225 | 2.504279  |
| H | -2.320046 | 5.180816 | 1.507724  |
| C | -0.191915 | 5.603463 | 1.331783  |
| H | 1.054355  | 3.749418 | -1.935269 |
| H | 1.854937  | 5.160124 | -1.245886 |
| H | 1.247070  | 4.326783 | 2.352242  |
| H | 1.981265  | 5.502185 | 1.249396  |
| H | -0.413256 | 5.760352 | -2.128845 |
| C | -0.326327 | 6.303814 | -0.029279 |
| H | -0.199721 | 6.354964 | 2.137361  |
| H | 0.502126  | 7.017755 | -0.171265 |
| H | -1.261645 | 6.887062 | -0.063820 |

-----  
8-conf06

- Electronic Energy (Eh): -7051.02217173  
- Cartesian Coordinates:

|    |           |           |           |
|----|-----------|-----------|-----------|
| Br | -3.798239 | -1.147853 | 2.662073  |
| C  | -3.061266 | -0.457686 | 1.054837  |
| C  | -1.899486 | 0.300984  | 1.130904  |
| C  | -1.311527 | 0.837005  | -0.016655 |
| C  | -0.012437 | 1.617806  | 0.112595  |
| C  | 1.182590  | 0.687378  | -0.023209 |
| C  | 2.075699  | 0.531261  | 1.036473  |
| C  | 3.186587  | -0.298293 | 0.918847  |
| Br | 4.357409  | -0.455635 | 2.404588  |
| C  | 3.444845  | -1.005338 | -0.266502 |
| N  | 4.576899  | -1.830699 | -0.342780 |
| C  | 4.996669  | -2.572980 | -1.398234 |
| C  | 6.300131  | -3.364976 | -1.117955 |
| F  | 6.076176  | -4.663098 | -1.257107 |
| F  | 7.241073  | -2.999782 | -1.975849 |
| F  | 6.768667  | -3.157023 | 0.122629  |
| O  | 4.482333  | -2.675422 | -2.484102 |
| C  | 2.542936  | -0.850798 | -1.329370 |
| C  | 1.436902  | -0.021154 | -1.200470 |
| C  | -1.937124 | 0.587676  | -1.240861 |
| C  | -3.099417 | -0.169860 | -1.329131 |
| C  | -3.686124 | -0.711263 | -0.178194 |
| N  | -4.858046 | -1.481731 | -0.210328 |
| C  | -5.602999 | -1.818042 | -1.293362 |
| C  | -6.840161 | -2.686735 | -0.947874 |
| F  | -7.946366 | -2.063654 | -1.325970 |
| F  | -6.936835 | -2.939293 | 0.366849  |
| F  | -6.765892 | -3.847215 | -1.582051 |
| O  | -5.409705 | -1.523047 | -2.446592 |
| H  | -1.443059 | 0.472766  | 2.107969  |
| H  | 0.012349  | 2.000497  | 1.142695  |
| H  | 1.912822  | 1.067272  | 1.973663  |
| H  | 5.147206  | -1.868441 | 0.497064  |
| H  | 2.725619  | -1.394069 | -2.253628 |
| H  | 0.753826  | 0.065879  | -2.047833 |
| H  | -1.523994 | 1.000256  | -2.163174 |
| H  | -3.572107 | -0.349865 | -2.291856 |
| H  | -5.181150 | -1.823528 | 0.690195  |
| C  | 0.087222  | 2.825701  | -0.845759 |
| H  | 0.055781  | 2.430516  | -1.876858 |

|   |           |          |           |
|---|-----------|----------|-----------|
| C | 1.416489  | 3.602901 | -0.709726 |
| C | -1.081530 | 3.825133 | -0.688165 |
| H | 2.261583  | 2.904412 | -0.809593 |
| C | 1.494069  | 4.317097 | 0.649252  |
| C | 1.496254  | 4.651187 | -1.830695 |
| H | -2.039968 | 3.289743 | -0.767081 |
| C | -1.005153 | 4.537922 | 0.671963  |
| C | -0.995931 | 4.872875 | -1.809050 |
| H | 2.452692  | 4.856122 | 0.725845  |
| H | 1.482856  | 3.591728 | 1.479207  |
| C | 0.322894  | 5.302050 | 0.785296  |
| H | 1.469261  | 4.153679 | -2.814535 |
| H | 2.457604  | 5.187793 | -1.770511 |
| C | 0.329439  | 5.640757 | -1.704538 |
| H | -1.108434 | 3.818579 | 1.500950  |
| H | -1.852114 | 5.237299 | 0.765942  |
| H | -1.073922 | 4.380605 | -2.792970 |
| H | -1.846397 | 5.570452 | -1.732743 |
| H | 0.376510  | 5.808608 | 1.762241  |
| C | 0.404382  | 6.344795 | -0.340754 |
| H | 0.388946  | 6.388843 | -2.511146 |
| H | -0.419971 | 7.070903 | -0.243589 |
| H | 1.344976  | 6.914962 | -0.260572 |

8-conf07

- Electronic Energy (Eh): -7051.02233881

- Cartesian Coordinates:

|    |           |           |           |
|----|-----------|-----------|-----------|
| Br | -4.514072 | -0.468687 | 2.514898  |
| C  | -3.261398 | -0.313645 | 1.097429  |
| C  | -2.148982 | 0.501309  | 1.283053  |
| C  | -1.197058 | 0.654451  | 0.275430  |
| C  | -0.000202 | 1.569323  | 0.483292  |
| C  | 1.293934  | 0.772516  | 0.425762  |
| C  | 1.971523  | 0.529600  | -0.771597 |
| C  | 3.126971  | -0.242228 | -0.793245 |
| Br | 3.992399  | -0.521121 | -2.459966 |
| C  | 3.655445  | -0.803066 | 0.382274  |
| N  | 4.824941  | -1.574714 | 0.311339  |
| C  | 5.486959  | -2.176737 | 1.331296  |
| C  | 6.753685  | -2.947282 | 0.877293  |
| F  | 6.647473  | -4.224210 | 1.212080  |
| F  | 6.944204  | -2.881794 | -0.449725 |
| F  | 7.824698  | -2.438508 | 1.468555  |
| O  | 5.204349  | -2.172106 | 2.503649  |
| C  | 2.978698  | -0.555206 | 1.583250  |
| C  | 1.823865  | 0.218213  | 1.592540  |
| C  | -1.394711 | -0.041894 | -0.919874 |
| C  | -2.501653 | -0.856828 | -1.116581 |
| C  | -3.462390 | -1.008258 | -0.106241 |
| N  | -4.598611 | -1.818540 | -0.251432 |
| C  | -4.968144 | -2.547931 | -1.334168 |
| C  | -6.295660 | -3.324064 | -1.134043 |
| F  | -6.827925 | -3.123473 | 0.081656  |
| F  | -6.082613 | -4.623547 | -1.276929 |
| F  | -7.183491 | -2.935252 | -2.037184 |
| O  | -4.395236 | -2.649475 | -2.390493 |
| H  | -2.031315 | 1.027933  | 2.232238  |
| H  | -0.075879 | 1.946408  | 1.512901  |
| H  | 1.612934  | 0.953640  | -1.710401 |
| H  | 5.217292  | -1.690299 | -0.618623 |
| H  | 3.374098  | -0.976045 | 2.504804  |
| H  | 1.318713  | 0.390682  | 2.546200  |
| H  | -0.665606 | 0.043104  | -1.728235 |
| H  | -2.639663 | -1.390553 | -2.054022 |
| H  | -5.214506 | -1.854707 | 0.555765  |
| C  | -0.033121 | 2.782561  | -0.472774 |
| H  | 0.044775  | 2.391440  | -1.503260 |
| C  | 1.139864  | 3.764966  | -0.251791 |
| C  | -1.356496 | 3.578348  | -0.401571 |

|   |           |          |           |
|---|-----------|----------|-----------|
| H | 2.093829  | 3.216838 | -0.283519 |
| C | 1.004188  | 4.473631 | 1.105703  |
| C | 1.126275  | 4.817394 | -1.371473 |
| H | -2.205057 | 2.892207 | -0.547215 |
| C | -1.493205 | 4.288831 | 0.954638  |
| C | -1.364291 | 4.631314 | -1.520937 |
| H | 1.855192  | 5.160188 | 1.246085  |
| H | 1.054510  | 3.749487 | 1.935360  |
| C | -0.316744 | 5.256504 | 1.154108  |
| H | 1.247278  | 4.327155 | -2.352115 |
| H | 1.981549  | 5.502432 | -1.249186 |
| C | -0.191621 | 5.603857 | -1.331567 |
| H | -1.534406 | 3.560468 | 1.780989  |
| H | -2.446824 | 4.841149 | 0.984490  |
| H | -1.294233 | 4.136777 | -2.504177 |
| H | -2.319781 | 5.181377 | -1.507557 |
| H | -0.412965 | 5.760509 | 2.129072  |
| C | -0.325991 | 6.304116 | 0.029546  |
| H | -0.199372 | 6.355419 | -2.137089 |
| H | -1.261269 | 6.887428 | 0.064125  |
| H | 0.502512  | 7.017988 | 0.171595  |

8-conf08

- Electronic Energy (Eh): -7051.02245126

- Cartesian Coordinates:

|    |           |           |           |
|----|-----------|-----------|-----------|
| Br | 2.910422  | -1.648652 | 2.278059  |
| C  | 2.643387  | -0.729553 | 0.638400  |
| C  | 1.512561  | 0.063705  | 0.502351  |
| C  | 1.267637  | 0.763418  | -0.682095 |
| C  | 0.045528  | 1.656881  | -0.826318 |
| C  | -1.229522 | 0.837345  | -0.700875 |
| C  | -1.850660 | 0.600839  | 0.527934  |
| C  | -2.986755 | -0.195391 | 0.611461  |
| Br | -3.774361 | -0.463783 | 2.318126  |
| C  | -3.551783 | -0.787629 | -0.530933 |
| N  | -4.699808 | -1.582822 | -0.397502 |
| C  | -5.389234 | -2.219398 | -1.377682 |
| C  | -6.618197 | -3.009047 | -0.857294 |
| F  | -7.724193 | -2.534180 | -1.411082 |
| F  | -6.497504 | -4.289104 | -1.174724 |
| F  | -6.754302 | -2.924273 | 0.475403  |
| O  | -5.155212 | -2.231363 | -2.560566 |
| C  | -2.931784 | -0.546127 | -1.763588 |
| C  | -1.795750 | 0.251316  | -1.834839 |
| C  | 2.189700  | 0.629671  | -1.719670 |
| C  | 3.325929  | -0.164166 | -1.595225 |
| C  | 3.576028  | -0.860651 | -0.407493 |
| N  | 4.703420  | -1.675492 | -0.224128 |
| C  | 5.708037  | -1.914799 | -1.103953 |
| C  | 6.795107  | -2.875135 | -0.555792 |
| F  | 6.877445  | -3.948279 | -1.327910 |
| F  | 6.532318  | -3.284847 | 0.695081  |
| F  | 7.970812  | -2.264747 | -0.546565 |
| O  | 5.836150  | -1.476095 | -2.220022 |
| H  | 0.812239  | 0.126490  | 1.336788  |
| H  | 0.064003  | 2.031856  | -1.859337 |
| H  | -1.462954 | 1.049181  | 1.443704  |
| H  | -5.050659 | -1.688413 | 0.549987  |
| H  | -3.356116 | -0.991647 | -2.660352 |
| H  | -1.334425 | 0.417132  | -2.811558 |
| H  | 2.025432  | 1.162752  | -2.659256 |
| H  | 4.034092  | -0.254238 | -2.415634 |
| H  | 4.767387  | -2.136701 | 0.678801  |
| C  | 0.106751  | 2.872695  | 0.125306  |
| H  | 0.084635  | 2.482678  | 1.159121  |
| C  | -1.089912 | 3.837619  | -0.039706 |
| C  | 1.413288  | 3.687787  | -0.009289 |
| H  | -2.033298 | 3.275850  | 0.037453  |
| C  | -1.029595 | 4.546998  | -1.402346 |

|   |           |          |           |
|---|-----------|----------|-----------|
| C | -1.038284 | 4.891250 | 1.077735  |
| H | 2.278045  | 3.014555 | 0.095185  |
| C | 1.474359  | 4.398635 | -1.370745 |
| C | 1.459068  | 4.741972 | 1.108045  |
| H | -1.896382 | 5.220825 | -1.501867 |
| H | -1.108797 | 3.821484 | -2.228482 |
| C | 0.275932  | 5.348997 | -1.513991 |
| H | -1.105140 | 4.400376 | 2.063293  |
| H | -1.908396 | 5.563540 | 0.996231  |
| C | 0.264546  | 5.696963 | 0.974587  |
| H | 1.486225  | 3.669636 | -2.197299 |
| H | 2.417451  | 4.964417 | -1.446662 |
| H | 1.443307  | 4.247597 | 2.093809  |
| H | 2.404672  | 5.305893 | 1.048739  |
| H | 0.318099  | 5.853273 | -2.492612 |
| C | 0.323418  | 6.397807 | -0.391634 |
| H | 0.299659  | 6.449374 | 1.778614  |
| H | 1.247320  | 6.994707 | -0.470924 |
| H | -0.521324 | 7.099325 | -0.494053 |

-----  
8-conf09

- Electronic Energy (Eh): -7051.02217191  
- Cartesian Coordinates:

|    |           |           |           |
|----|-----------|-----------|-----------|
| Br | -3.798147 | -1.147650 | 2.662158  |
| C  | -3.061197 | -0.457571 | 1.054872  |
| C  | -1.899462 | 0.301169  | 1.130903  |
| C  | -1.311496 | 0.837118  | -0.016687 |
| C  | -0.012420 | 1.617953  | 0.112541  |
| C  | 1.182613  | 0.687529  | -0.023227 |
| C  | 2.075734  | 0.531442  | 1.036434  |
| C  | 3.186629  | -0.298124 | 0.918808  |
| Br | 4.357385  | -0.455467 | 2.404610  |
| C  | 3.444883  | -1.005182 | -0.266527 |
| N  | 4.576882  | -1.830625 | -0.342792 |
| C  | 4.996721  | -2.572732 | -1.398326 |
| C  | 6.299664  | -3.365493 | -1.117793 |
| F  | 6.074826  | -4.663490 | -1.256768 |
| F  | 7.240935  | -3.001048 | -1.975652 |
| F  | 6.768183  | -3.157639 | 0.122802  |
| O  | 4.482742  | -2.674605 | -2.484421 |
| C  | 2.542983  | -0.850618 | -1.329410 |
| C  | 1.436939  | -0.021010 | -1.200500 |
| C  | -1.937063 | 0.587680  | -1.240886 |
| C  | -3.099286 | -0.169966 | -1.329131 |
| C  | -3.685983 | -0.711309 | -0.178165 |
| N  | -4.857834 | -1.481897 | -0.210289 |
| C  | -5.602485 | -1.818687 | -1.293375 |
| C  | -6.839884 | -2.687007 | -0.947809 |
| F  | -7.945952 | -2.063134 | -1.325181 |
| F  | -6.936165 | -2.940094 | 0.366830  |
| F  | -6.766468 | -3.847186 | -1.582558 |
| O  | -5.408879 | -1.524188 | -2.446683 |
| H  | -1.443061 | 0.473048  | 2.107962  |
| H  | 0.012348  | 2.000674  | 1.142627  |
| H  | 1.912900  | 1.067470  | 1.973622  |
| H  | 5.146982  | -1.868641 | 0.497179  |
| H  | 2.725746  | -1.393786 | -2.253712 |
| H  | 0.753828  | 0.065996  | -2.047835 |
| H  | -1.523947 | 1.000228  | -2.163219 |
| H  | -3.571912 | -0.350117 | -2.291860 |
| H  | -5.180998 | -1.823542 | 0.690269  |
| C  | 0.087234  | 2.825834  | -0.845836 |
| H  | 0.055876  | 2.430626  | -1.876924 |
| C  | 1.416457  | 3.603112  | -0.709757 |
| C  | -1.081577 | 3.825200  | -0.688317 |
| H  | 2.261597  | 2.904673  | -0.809579 |
| C  | 1.493935  | 4.317343  | 0.649204  |
| C  | 1.496207  | 4.651367  | -1.830757 |
| H  | -2.039989 | 3.289765  | -0.767258 |

|   |           |          |           |
|---|-----------|----------|-----------|
| C | -1.005299 | 4.538039 | 0.671795  |
| C | -0.995992 | 4.872923 | -1.809227 |
| H | 2.452525  | 4.856415 | 0.725849  |
| H | 1.482707  | 3.591991 | 1.479171  |
| C | 0.322701  | 5.302244 | 0.785169  |
| H | 1.469286  | 4.153824 | -2.814578 |
| H | 2.457525  | 5.188022 | -1.770549 |
| C | 0.329334  | 5.640883 | -1.704682 |
| H | -1.108577 | 3.818725 | 1.500804  |
| H | -1.852305 | 5.237364 | 0.765715  |
| H | -1.073913 | 4.380626 | -2.793135 |
| H | -1.846501 | 5.570446 | -1.732969 |
| H | 0.376250  | 5.808833 | 1.762102  |
| C | 0.404185  | 6.344962 | -0.340911 |
| H | 0.388834  | 6.388950 | -2.511308 |
| H | -0.420202 | 7.071033 | -0.243798 |
| H | 1.344744  | 6.915177 | -0.260705 |

-----  
8-conf10

- Electronic Energy (Eh): -7051.0223387  
- Cartesian Coordinates:

|    |           |           |           |
|----|-----------|-----------|-----------|
| Br | 3.992437  | -0.521153 | 2.459981  |
| C  | 3.127067  | -0.242150 | 0.793253  |
| C  | 1.971557  | 0.529589  | 0.771627  |
| C  | 1.293999  | 0.772550  | -0.425737 |
| C  | -0.000206 | 1.569248  | -0.483285 |
| C  | -1.196994 | 0.654267  | -0.275518 |
| C  | -2.149017 | 0.501274  | -1.283060 |
| C  | -3.261403 | -0.313726 | -1.097438 |
| Br | -4.514178 | -0.468605 | -2.514835 |
| C  | -3.462245 | -1.008542 | 0.106141  |
| N  | -4.598414 | -1.818913 | 0.251275  |
| C  | -4.968082 | -2.548042 | 1.334143  |
| C  | -6.295542 | -3.324249 | 1.133930  |
| F  | -7.183959 | -2.934448 | 2.036053  |
| F  | -6.826919 | -3.124819 | -0.082342 |
| F  | -6.082692 | -4.623615 | 1.278278  |
| O  | -4.395326 | -2.649240 | 2.390579  |
| C  | -2.501378 | -0.857284 | 1.116386  |
| C  | -1.394481 | -0.042301 | 0.919692  |
| C  | 1.824025  | 0.218401  | -1.592548 |
| C  | 2.978933  | -0.554910 | -1.583279 |
| C  | 3.655636  | -0.802827 | -0.382299 |
| N  | 4.825178  | -1.574419 | -0.311378 |
| C  | 5.487645  | -2.175759 | -1.331452 |
| C  | 6.753858  | -2.947063 | -0.877317 |
| F  | 6.945472  | -2.879857 | 0.449457  |
| F  | 7.824980  | -2.440541 | -1.470188 |
| F  | 6.645789  | -4.224422 | -1.210084 |
| O  | 5.205599  | -2.170293 | -2.503935 |
| H  | 1.612888  | 0.953529  | 1.710446  |
| H  | -0.075861 | 1.946378  | -1.512881 |
| H  | -2.031456 | 1.028052  | -2.232172 |
| H  | -5.214031 | -1.855433 | -0.556111 |
| H  | -2.639346 | -1.391164 | 2.053748  |
| H  | -0.665252 | 0.042545  | 1.727955  |
| H  | 1.318903  | 0.390922  | -2.546211 |
| H  | 3.374434  | -0.975564 | -2.504873 |
| H  | 5.217509  | -1.690044 | 0.618584  |
| C  | -0.033294 | 2.782440  | 0.472834  |
| H  | 0.044639  | 2.391276  | 1.503299  |
| C  | -1.356767 | 3.578069  | 0.401657  |
| C  | 1.139570  | 3.765001  | 0.251896  |
| H  | -2.205244 | 2.891816  | 0.547267  |
| C  | -1.493554 | 4.288587  | -0.954530 |
| C  | -1.364692 | 4.630984  | 1.521065  |
| H  | 2.093603  | 3.216984  | 0.283598  |
| C  | 1.003814  | 4.473714  | -1.105568 |
| C  | 1.125850  | 4.817380  | 1.371620  |

|   |           |          |           |
|---|-----------|----------|-----------|
| H | -2.447243 | 4.840783 | -0.984370 |
| H | -1.534654 | 3.560242 | -1.780902 |
| C | -0.317218 | 5.256415 | -1.153951 |
| H | -1.294581 | 4.136414 | 2.504284  |
| H | -2.320249 | 5.180932 | 1.507703  |
| C | -0.192144 | 5.603680 | 1.331741  |
| H | 1.054249  | 3.749621 | -1.935262 |
| H | 1.854730  | 5.160390 | -1.245900 |
| H | 1.246912  | 4.327117 | 2.352243  |
| H | 1.981041  | 5.502526 | 1.249360  |
| H | -0.413494 | 5.760455 | -2.128890 |
| C | -0.326600 | 6.303979 | -0.029342 |
| H | -0.199992 | 6.355208 | 2.137294  |
| H | 0.501813  | 7.017962 | -0.171363 |
| H | -1.261953 | 6.887172 | -0.063901 |

-----  
8-conf11

- Electronic Energy (Eh): -7051.022338919999

- Cartesian Coordinates:

|    |           |           |           |
|----|-----------|-----------|-----------|
| Br | -4.513849 | -0.469078 | 2.514938  |
| C  | -3.261187 | -0.313873 | 1.097475  |
| C  | -2.148869 | 0.501213  | 1.283119  |
| C  | -1.196960 | 0.654471  | 0.275505  |
| C  | -0.000204 | 1.569484  | 0.483348  |
| C  | 1.294000  | 0.772787  | 0.425815  |
| C  | 1.971593  | 0.529925  | -0.771554 |
| C  | 3.127053  | -0.241876 | -0.793222 |
| Br | 3.992501  | -0.520719 | -2.459942 |
| C  | 3.655542  | -0.802740 | 0.382280  |
| N  | 4.825023  | -1.574397 | 0.311328  |
| C  | 5.487060  | -2.176394 | 1.331290  |
| C  | 6.753369  | -2.947558 | 0.877203  |
| F  | 6.944565  | -2.881031 | -0.449663 |
| F  | 7.824509  | -2.440281 | 1.469451  |
| F  | 6.645877  | -4.224736 | 1.210747  |
| O  | 5.204657  | -2.171461 | 2.503692  |
| C  | 2.978829  | -0.554876 | 1.583268  |
| C  | 1.823967  | 0.218512  | 1.592584  |
| C  | -1.394512 | -0.041895 | -0.919805 |
| C  | -2.501352 | -0.856965 | -1.116524 |
| C  | -3.462086 | -1.008504 | -0.106199 |
| N  | -4.598231 | -1.818889 | -0.251419 |
| C  | -4.967719 | -2.548243 | -1.334189 |
| C  | -6.295315 | -3.324257 | -1.134198 |
| F  | -7.183423 | -2.934441 | -2.036661 |
| F  | -6.827054 | -3.124571 | 0.081876  |
| F  | -6.082658 | -4.623652 | -1.278293 |
| O  | -4.394802 | -2.649697 | -2.390522 |
| H  | -2.031270 | 1.027841  | 2.232310  |
| H  | -0.075911 | 1.946567  | 1.512957  |
| H  | 1.612980  | 0.953987  | -1.710340 |
| H  | 5.217333  | -1.690059 | -0.618639 |
| H  | 3.374246  | -0.975664 | 2.504837  |
| H  | 1.318847  | 0.390969  | 2.546261  |
| H  | -0.665399 | 0.043183  | -1.728150 |
| H  | -2.639276 | -1.390708 | -2.053966 |
| H  | -5.214000 | -1.855343 | 0.555863  |
| C  | -0.033269 | 2.782695  | -0.472727 |
| H  | 0.044718  | 2.391577  | -1.503208 |
| C  | 1.139573  | 3.765263  | -0.251695 |
| C  | -1.356763 | 3.578278  | -0.401573 |
| H  | 2.093610  | 3.217262  | -0.283404 |
| C  | 1.003745  | 4.473893  | 1.105798  |
| C  | 1.125869  | 4.817702  | -1.371367 |
| H  | -2.205211 | 2.892007  | -0.547253 |
| C  | -1.493622 | 4.288724  | 0.954641  |
| C  | -1.364665 | 4.631254  | -1.520927 |
| H  | 1.854636  | 5.160585  | 1.246211  |
| H  | 1.054152  | 3.749754  | 1.935452  |

|   |           |          |           |
|---|-----------|----------|-----------|
| C | -0.317309 | 5.256566 | 1.154166  |
| H | 1.246980  | 4.327489 | -2.352009 |
| H | 1.981035  | 5.502867 | -1.249040 |
| C | -0.192146 | 5.603968 | -1.331501 |
| H | -1.534746 | 3.560342 | 1.780978  |
| H | -2.447318 | 4.840910 | 0.984467  |
| H | -1.294494 | 4.136741 | -2.504170 |
| H | -2.320234 | 5.181181 | -1.507577 |
| H | -0.413639 | 5.760541 | 2.129131  |
| C | -0.326669 | 6.304190 | 0.029616  |
| H | -0.199978 | 6.355536 | -2.137013 |
| H | -1.262036 | 6.887360 | 0.064170  |
| H | 0.501726  | 7.018181 | 0.171701  |

-----  
9-conf10

- Electronic Energy (Eh): -6896.16284408

- Cartesian Coordinates:

|    |           |           |           |
|----|-----------|-----------|-----------|
| Br | 3.779976  | 0.304701  | 2.189987  |
| C  | 2.969377  | 0.336921  | 0.473322  |
| C  | 1.849857  | 1.139963  | 0.288003  |
| C  | 1.212959  | 1.206594  | -0.953336 |
| C  | -0.052221 | 2.021419  | -1.177204 |
| C  | -0.102746 | 3.355571  | -0.400328 |
| C  | -1.413489 | 4.111053  | -0.658091 |
| C  | -1.462561 | 5.446554  | 0.084365  |
| C  | -0.260606 | 6.327416  | -0.252369 |
| C  | 1.049986  | 5.585369  | 0.004098  |
| C  | 1.095797  | 4.251618  | -0.741283 |
| C  | -1.277666 | 1.156038  | -0.923643 |
| C  | -1.501924 | 0.580395  | 0.329694  |
| C  | -2.632321 | -0.189690 | 0.565990  |
| Br | -2.870329 | -0.938725 | 2.294184  |
| C  | -3.584510 | -0.421260 | -0.444183 |
| N  | -4.709628 | -1.209535 | -0.159123 |
| C  | -5.733049 | -1.529269 | -0.990504 |
| C  | -6.815233 | -2.419504 | -0.326449 |
| F  | -6.513293 | -2.731003 | 0.943681  |
| F  | -7.978794 | -1.785357 | -0.324917 |
| F  | -6.946187 | -3.549639 | -1.004086 |
| O  | -5.882286 | -1.202488 | -2.141775 |
| C  | -3.355766 | 0.152389  | -1.700061 |
| C  | -2.220270 | 0.924995  | -1.924940 |
| C  | 1.744471  | 0.443087  | -1.994953 |
| C  | 2.863275  | -0.362630 | -1.821500 |
| C  | 3.500130  | -0.432799 | -0.575537 |
| N  | 4.632029  | -1.227744 | -0.341311 |
| C  | 5.283620  | -2.027812 | -1.222595 |
| C  | 6.499848  | -2.765841 | -0.605427 |
| F  | 6.318608  | -4.075675 | -0.685899 |
| F  | 7.602478  | -2.446006 | -1.265832 |
| F  | 6.686185  | -2.453166 | 0.686605  |
| O  | 5.023573  | -2.216414 | -2.384874 |
| H  | 1.486932  | 1.727172  | 1.132757  |
| H  | -0.070620 | 2.284723  | -2.247958 |
| H  | -0.068515 | 3.132637  | 0.683425  |
| H  | -2.275249 | 3.490535  | -0.369444 |
| H  | -1.509761 | 4.291205  | -1.745236 |
| H  | -2.402611 | 5.970170  | -0.149478 |
| H  | -1.477173 | 5.252663  | 1.171833  |
| H  | -0.310136 | 6.617455  | -1.317149 |
| H  | -0.294046 | 7.262654  | 0.328195  |
| H  | 1.910123  | 6.207802  | -0.288001 |
| H  | 1.155772  | 5.397458  | 1.087642  |
| H  | 2.041593  | 3.732174  | -0.525831 |
| H  | 1.088785  | 4.441056  | -1.830645 |
| H  | -0.785183 | 0.723423  | 1.140039  |
| H  | -4.754648 | -1.580929 | 0.785377  |
| H  | -4.080298 | -0.015821 | -2.493499 |
| H  | -2.073424 | 1.363320  | -2.914944 |

|   |          |           |           |
|---|----------|-----------|-----------|
| H | 1.268421 | 0.471609  | -2.978168 |
| H | 3.260698 | -0.948267 | -2.647267 |
| H | 5.001887 | -1.193882 | 0.604229  |

-----  
9-conf02

- Electronic Energy (Eh): -6896.16280295

- Cartesian Coordinates:

|    |           |           |           |
|----|-----------|-----------|-----------|
| Br | -2.959823 | -1.010175 | -2.471640 |
| C  | -2.653046 | -0.173620 | -0.795317 |
| C  | -1.527404 | 0.625834  | -0.651966 |
| C  | -1.254647 | 1.265997  | 0.559784  |
| C  | -0.036816 | 2.165220  | 0.710729  |
| C  | -0.157167 | 3.463475  | -0.117594 |
| C  | 1.036075  | 4.397756  | 0.124922  |
| C  | 0.922417  | 5.697738  | -0.671079 |
| C  | -0.390450 | 6.422500  | -0.378995 |
| C  | -1.587118 | 5.503309  | -0.618123 |
| C  | -1.470458 | 4.201625  | 0.175068  |
| C  | 1.232824  | 1.368167  | 0.449508  |
| C  | 1.822918  | 0.664479  | 1.501863  |
| C  | 2.948343  | -0.123611 | 1.295681  |
| Br | 3.691431  | -1.046519 | 2.778341  |
| C  | 3.532874  | -0.240822 | 0.022474  |
| N  | 4.669456  | -1.046748 | -0.141371 |
| C  | 5.366781  | -1.278993 | -1.281797 |
| C  | 6.573140  | -2.233410 | -1.086133 |
| F  | 7.692957  | -1.620604 | -1.439473 |
| F  | 6.705925  | -2.635963 | 0.187287  |
| F  | 6.419927  | -3.311320 | -1.840931 |
| O  | 5.152506  | -0.839316 | -2.384211 |
| C  | 2.943553  | 0.466997  | -1.032261 |
| C  | 1.817252  | 1.252903  | -0.814067 |
| C  | -2.143035 | 1.067850  | 1.616164  |
| C  | -3.272971 | 0.266143  | 1.484643  |
| C  | -3.551113 | -0.371339 | 0.270236  |
| N  | -4.674090 | -1.190385 | 0.078562  |
| C  | -5.647287 | -1.489863 | 0.975041  |
| C  | -6.745201 | -2.426005 | 0.407043  |
| F  | -7.918018 | -1.809566 | 0.433178  |
| F  | -6.499646 | -2.792483 | -0.860519 |
| F  | -6.824313 | -3.524680 | 1.142010  |
| O  | -5.743812 | -1.114901 | 2.117275  |
| H  | -0.852108 | 0.740948  | -1.501423 |
| H  | -0.005910 | 2.475022  | 1.768780  |
| H  | -0.170991 | 3.194468  | -1.190997 |
| H  | 1.981093  | 3.888931  | -0.117503 |
| H  | 1.079198  | 4.632969  | 1.204591  |
| H  | 1.781555  | 6.349740  | -0.448835 |
| H  | 0.978310  | 5.466736  | -1.749959 |
| H  | -0.393636 | 6.755805  | 0.674236  |
| H  | -0.474183 | 7.331665  | -0.994834 |
| H  | -2.526231 | 6.016516  | -0.358745 |
| H  | -1.651144 | 5.263493  | -1.694567 |
| H  | -2.331011 | 3.551601  | -0.043949 |
| H  | -1.516923 | 4.425474  | 1.257423  |
| H  | 1.395285  | 0.725059  | 2.504772  |
| H  | 5.003271  | -1.507900 | 0.700154  |
| H  | 3.384483  | 0.393189  | -2.023633 |
| H  | 1.399632  | 1.795616  | -1.664351 |
| H  | -1.957450 | 1.556774  | 2.575552  |
| H  | -3.954810 | 0.124469  | 2.319941  |
| H  | -4.760080 | -1.605044 | -0.844934 |

-----  
9-conf03

- Electronic Energy (Eh): -6896.16257292

- Cartesian Coordinates:

|    |           |           |          |
|----|-----------|-----------|----------|
| Br | -4.405146 | -0.018741 | 2.396835 |
|----|-----------|-----------|----------|

|    |           |           |           |
|----|-----------|-----------|-----------|
| C  | -3.204209 | 0.173013  | 0.939376  |
| C  | -2.098197 | 1.002466  | 1.097521  |
| C  | -1.183985 | 1.181513  | 0.059856  |
| C  | 0.009251  | 2.108968  | 0.234869  |
| C  | -0.087423 | 3.366385  | -0.657055 |
| C  | 1.079389  | 4.329854  | -0.399983 |
| C  | 0.984683  | 5.592521  | -1.256365 |
| C  | -0.351009 | 6.307170  | -1.058317 |
| C  | -1.521384 | 5.359155  | -1.314390 |
| C  | -1.424193 | 4.094488  | -0.461064 |
| C  | 1.302034  | 1.321806  | 0.077348  |
| C  | 1.849369  | 0.683586  | 1.192522  |
| C  | 2.996175  | -0.093094 | 1.083489  |
| Br | 3.676790  | -0.926595 | 2.647072  |
| C  | 3.646328  | -0.263351 | -0.151203 |
| N  | 4.802321  | -1.055513 | -0.216895 |
| C  | 5.565291  | -1.324740 | -1.306158 |
| C  | 6.771849  | -2.250652 | -1.003299 |
| F  | 6.852894  | -2.577078 | 0.296066  |
| F  | 6.662535  | -3.372658 | -1.699498 |
| F  | 7.899669  | -1.645559 | -1.343371 |
| O  | 5.405262  | -0.937540 | -2.437017 |
| C  | 3.099707  | 0.379222  | -1.268967 |
| C  | 1.951033  | 1.153565  | -1.148089 |
| C  | -1.412170 | 0.497618  | -1.137185 |
| C  | -2.514123 | -0.330140 | -1.306828 |
| C  | -3.436815 | -0.509076 | -0.265881 |
| N  | -4.565064 | -1.334994 | -0.382190 |
| C  | -4.964032 | -2.052581 | -1.462561 |
| C  | -6.268315 | -2.856901 | -1.223927 |
| F  | -6.768323 | -2.668008 | 0.007310  |
| F  | -7.190709 | -2.488155 | -2.099990 |
| F  | -6.031028 | -4.151724 | -1.373404 |
| O  | -4.430359 | -2.127044 | -2.541337 |
| H  | -1.956737 | 1.521457  | 2.047620  |
| H  | -0.017772 | 2.467781  | 1.277539  |
| H  | -0.044757 | 3.049569  | -1.716350 |
| H  | 2.041996  | 3.826730  | -0.576024 |
| H  | 1.068394  | 4.611876  | 0.669286  |
| H  | 1.822653  | 6.267646  | -1.022622 |
| H  | 1.095347  | 5.316458  | -2.320292 |
| H  | -0.409693 | 6.684549  | -0.021683 |
| H  | -0.418100 | 7.188027  | -1.715908 |
| H  | -2.479280 | 5.867286  | -1.122463 |
| H  | -1.529870 | 5.072821  | -2.381243 |
| H  | -2.263090 | 3.421312  | -0.693816 |
| H  | -1.527102 | 4.363658  | 0.607074  |
| H  | 1.371260  | 0.787262  | 2.168776  |
| H  | 5.097674  | -1.471247 | 0.661749  |
| H  | 3.591748  | 0.263712  | -2.231902 |
| H  | 1.567312  | 1.643866  | -2.044772 |
| H  | -0.710432 | 0.603498  | -1.967130 |
| H  | -2.677076 | -0.853213 | -2.246283 |
| H  | -5.150881 | -1.392178 | 0.445846  |

-----  
9-conf04

- Electronic Energy (Eh): -6896.161022760001

- Cartesian Coordinates:

|    |           |           |           |
|----|-----------|-----------|-----------|
| Br | 2.521230  | -1.121039 | 2.291380  |
| C  | 2.433013  | -0.216007 | 0.625012  |
| C  | 1.306345  | 0.545158  | 0.346235  |
| C  | 1.188280  | 1.234274  | -0.864822 |
| C  | -0.019270 | 2.110258  | -1.155197 |
| C  | 0.136716  | 3.532898  | -0.562502 |
| C  | 1.264881  | 4.318244  | -1.244705 |
| C  | 1.330166  | 5.760485  | -0.740099 |
| C  | 1.474700  | 5.818013  | 0.780754  |
| C  | 0.372848  | 5.016488  | 1.473719  |
| C  | 0.327528  | 3.577011  | 0.959442  |

|    |           |           |           |
|----|-----------|-----------|-----------|
| C  | -1.330383 | 1.406536  | -0.808404 |
| C  | -1.491295 | 0.065629  | -1.180653 |
| C  | -2.674474 | -0.614474 | -0.932783 |
| Br | -2.803199 | -2.431496 | -1.467610 |
| C  | -3.760115 | 0.015752  | -0.297233 |
| N  | -4.934671 | -0.712593 | -0.057222 |
| C  | -6.071021 | -0.281441 | 0.545630  |
| C  | -7.168420 | -1.371925 | 0.649916  |
| F  | -6.788525 | -2.534553 | 0.097421  |
| F  | -7.454774 | -1.599887 | 1.923403  |
| F  | -8.266955 | -0.965706 | 0.031670  |
| O  | -6.302981 | 0.814586  | 0.992212  |
| C  | -3.605573 | 1.356407  | 0.067591  |
| C  | -2.413942 | 2.030692  | -0.188464 |
| C  | 2.232937  | 1.118347  | -1.782334 |
| C  | 3.367137  | 0.357903  | -1.513578 |
| C  | 3.490126  | -0.324159 | -0.297644 |
| N  | 4.608186  | -1.105990 | 0.028666  |
| C  | 5.720635  | -1.319146 | -0.718425 |
| C  | 6.767180  | -2.228765 | -0.024256 |
| F  | 6.335050  | -2.696373 | 1.157177  |
| F  | 7.046102  | -3.266231 | -0.797624 |
| F  | 7.882014  | -1.544793 | 0.191570  |
| O  | 5.970840  | -0.885101 | -1.815391 |
| H  | 0.501911  | 0.592389  | 1.082042  |
| H  | -0.042204 | 2.250371  | -2.250301 |
| H  | -0.797602 | 4.072317  | -0.801053 |
| H  | 1.124268  | 4.305803  | -2.338471 |
| H  | 2.229730  | 3.819433  | -1.046075 |
| H  | 2.163801  | 6.291842  | -1.225208 |
| H  | 0.407473  | 6.290032  | -1.037573 |
| H  | 2.456636  | 5.400705  | 1.066623  |
| H  | 1.466557  | 6.863329  | 1.127206  |
| H  | 0.522317  | 5.022034  | 2.564646  |
| H  | -0.603084 | 5.500980  | 1.290159  |
| H  | -0.466670 | 3.012886  | 1.473521  |
| H  | 1.277649  | 3.077393  | 1.215097  |
| H  | -0.672774 | -0.464384 | -1.671155 |
| H  | -4.922943 | -1.677703 | -0.374534 |
| H  | -4.432229 | 1.865239  | 0.557844  |
| H  | -2.353572 | 3.075958  | 0.114437  |
| H  | 2.166473  | 1.636729  | -2.741778 |
| H  | 4.170055  | 0.279955  | -2.242846 |
| H  | 4.571452  | -1.563545 | 0.935052  |

-----  
9-conf05

- Electronic Energy (Eh): -6896.16089681

- Cartesian Coordinates:

|    |           |           |           |
|----|-----------|-----------|-----------|
| Br | 2.715460  | -1.347114 | 2.127325  |
| C  | 2.601053  | -0.397617 | 0.487496  |
| C  | 1.433148  | 0.298387  | 0.207793  |
| C  | 1.294600  | 1.016779  | -0.983725 |
| C  | 0.040336  | 1.825366  | -1.271901 |
| C  | 0.099675  | 3.238065  | -0.639196 |
| C  | 1.181443  | 4.112602  | -1.287402 |
| C  | 1.148154  | 5.542031  | -0.744750 |
| C  | 1.273887  | 5.568301  | 0.778599  |
| C  | 0.220320  | 4.678426  | 1.438048  |
| C  | 0.274123  | 3.253463  | 0.885533  |
| C  | -1.228238 | 1.030408  | -0.968792 |
| C  | -2.342649 | 1.577660  | -0.331498 |
| C  | -3.490910 | 0.819851  | -0.117095 |
| Br | -4.954530 | 1.641481  | 0.771477  |
| C  | -3.577982 | -0.515786 | -0.536903 |
| N  | -4.754033 | -1.241004 | -0.294910 |
| C  | -5.015744 | -2.533563 | -0.614924 |
| C  | -6.424227 | -3.007159 | -0.171391 |
| F  | -7.143486 | -2.020899 | 0.386867  |
| F  | -7.096841 | -3.461952 | -1.216984 |

|   |           |           |           |
|---|-----------|-----------|-----------|
| F | -6.309384 | -3.981807 | 0.719533  |
| O | -4.293941 | -3.318931 | -1.177154 |
| C | -2.463635 | -1.064186 | -1.187870 |
| C | -1.322441 | -0.301511 | -1.391999 |
| C | 2.361851  | 0.996742  | -1.882125 |
| C | 3.537097  | 0.301880  | -1.612585 |
| C | 3.680401  | -0.408959 | -0.415449 |
| N | 4.840162  | -1.127974 | -0.089991 |
| C | 5.978495  | -1.243754 | -0.819292 |
| C | 7.065326  | -2.114337 | -0.137088 |
| F | 8.147735  | -1.384079 | 0.089418  |
| F | 6.654673  | -2.618862 | 1.036779  |
| F | 7.391095  | -3.126931 | -0.925669 |
| O | 6.222017  | -0.756143 | -1.895086 |
| H | 0.613187  | 0.270603  | 0.927240  |
| H | 0.025767  | 1.993135  | -2.363183 |
| H | -0.864281 | 3.724871  | -0.874111 |
| H | 1.052700  | 4.120366  | -2.382625 |
| H | 2.174448  | 3.671702  | -1.090639 |
| H | 1.950258  | 6.138874  | -1.206256 |
| H | 0.196006  | 6.018661  | -1.038969 |
| H | 2.278153  | 5.208287  | 1.064674  |
| H | 1.194060  | 6.601215  | 1.152110  |
| H | 0.359193  | 4.664109  | 2.530306  |
| H | -0.783519 | 5.103221  | 1.256817  |
| H | -0.484144 | 2.624400  | 1.378092  |
| H | 1.252895  | 2.810610  | 1.137291  |
| H | -2.342485 | 2.611069  | 0.012660  |
| H | -5.493543 | -0.728910 | 0.177215  |
| H | -2.509272 | -2.096411 | -1.527210 |
| H | -0.472314 | -0.765317 | -1.897232 |
| H | 2.280577  | 1.539640  | -2.826745 |
| H | 4.357294  | 0.298319  | -2.326659 |
| H | 4.816341  | -1.615590 | 0.800990  |

-----  
9-conf06

- Electronic Energy (Eh): -6896.16066195

- Cartesian Coordinates:

|    |           |           |           |
|----|-----------|-----------|-----------|
| Br | 2.952324  | -2.421706 | -1.334888 |
| C  | 2.812133  | -0.630659 | -0.721076 |
| C  | 1.603757  | 0.031009  | -0.882251 |
| C  | 1.433890  | 1.352396  | -0.449644 |
| C  | 0.095357  | 2.041976  | -0.709105 |
| C  | -0.062216 | 3.435025  | -0.050354 |
| C  | -0.186355 | 3.411988  | 1.478737  |
| C  | -0.236382 | 4.827772  | 2.054748  |
| C  | -1.382497 | 5.634521  | 1.444519  |
| C  | -1.304255 | 5.642802  | -0.082247 |
| C  | -1.234401 | 4.224070  | -0.649174 |
| C  | -1.081011 | 1.129432  | -0.403300 |
| C  | -2.154372 | 1.043958  | -1.290898 |
| C  | -3.260859 | 0.251721  | -1.001957 |
| Br | -4.680939 | 0.190238  | -2.260149 |
| C  | -3.333758 | -0.491240 | 0.187838  |
| N  | -4.467740 | -1.277863 | 0.439129  |
| C  | -4.721529 | -2.050330 | 1.525759  |
| C  | -6.088838 | -2.779219 | 1.461002  |
| F  | -5.903170 | -4.089151 | 1.522789  |
| F  | -6.845141 | -2.406340 | 2.482729  |
| F  | -6.759730 | -2.509435 | 0.330178  |
| O  | -4.023672 | -2.219513 | 2.494392  |
| C  | -2.250290 | -0.413200 | 1.074416  |
| C  | -1.150928 | 0.381410  | 0.776094  |
| C  | 2.533455  | 1.976302  | 0.141751  |
| C  | 3.750408  | 1.320248  | 0.311167  |
| C  | 3.915070  | -0.000726 | -0.115826 |
| N  | 5.116162  | -0.709843 | 0.033575  |
| C  | 6.275860  | -0.272843 | 0.585543  |
| C  | 7.402920  | -1.337812 | 0.583540  |

|   |           |           |           |
|---|-----------|-----------|-----------|
| F | 7.016819  | -2.491087 | 0.016021  |
| F | 8.449895  | -0.882835 | -0.088313 |
| F | 7.775254  | -1.599933 | 1.827722  |
| O | 6.508740  | 0.811895  | 1.058480  |
| H | 0.773112  | -0.498524 | -1.352363 |
| H | 0.070312  | 2.229570  | -1.797149 |
| H | 0.849597  | 4.003938  | -0.306635 |
| H | 0.640394  | 2.843644  | 1.933132  |
| H | -1.114144 | 2.881780  | 1.753800  |
| H | -0.338006 | 4.785080  | 3.150326  |
| H | 0.721178  | 5.339721  | 1.850105  |
| H | -2.342913 | 5.185775  | 1.754823  |
| H | -1.378572 | 6.664640  | 1.833924  |
| H | -2.168280 | 6.176530  | -0.508025 |
| H | -0.405618 | 6.202786  | -0.397058 |
| H | -1.142776 | 4.259502  | -1.747744 |
| H | -2.180158 | 3.698351  | -0.428936 |
| H | -2.135018 | 1.605258  | -2.227062 |
| H | -5.180980 | -1.259147 | -0.283985 |
| H | -2.286457 | -0.986926 | 1.997547  |
| H | -0.318476 | 0.409320  | 1.482104  |
| H | 2.465816  | 3.007065  | 0.489682  |
| H | 4.589750  | 1.828325  | 0.780140  |
| H | 5.106968  | -1.662972 | -0.318071 |

-----  
9-conf07

- Electronic Energy (Eh): -6896.16055941

- Cartesian Coordinates:

|    |           |           |           |
|----|-----------|-----------|-----------|
| Br | -4.891014 | 0.192003  | 2.319566  |
| C  | -3.433549 | 0.143685  | 1.104255  |
| C  | -2.289387 | 0.872009  | 1.413668  |
| C  | -1.187902 | 0.876346  | 0.556958  |
| C  | 0.031065  | 1.724917  | 0.880550  |
| C  | -0.036530 | 3.119814  | 0.210403  |
| C  | -1.156620 | 3.987220  | 0.800731  |
| C  | -1.135467 | 5.402697  | 0.222100  |
| C  | -1.212698 | 5.387080  | -1.304641 |
| C  | -0.120221 | 4.503577  | -1.906861 |
| C  | -0.161904 | 3.092532  | -1.318922 |
| C  | 1.330489  | 0.955756  | 0.652010  |
| C  | 2.449154  | 1.506192  | 0.025480  |
| C  | 3.624770  | 0.773557  | -0.116707 |
| Br | 5.093741  | 1.596805  | -0.994811 |
| C  | 3.735464  | -0.538041 | 0.367956  |
| N  | 4.939697  | -1.237484 | 0.200054  |
| C  | 5.234346  | -2.497512 | 0.608759  |
| C  | 6.678934  | -2.939299 | 0.258429  |
| F  | 7.355182  | -3.184186 | 1.371651  |
| F  | 6.647779  | -4.042253 | -0.473261 |
| F  | 7.347317  | -2.002575 | -0.432600 |
| O  | 4.521101  | -3.272271 | 1.196101  |
| C  | 2.615419  | -1.089654 | 1.006598  |
| C  | 1.447134  | -0.352681 | 1.138069  |
| C  | -1.268829 | 0.112422  | -0.611212 |
| C  | -2.405783 | -0.619009 | -0.929640 |
| C  | -3.517461 | -0.614494 | -0.075207 |
| N  | -4.690076 | -1.334466 | -0.348018 |
| C  | -4.963513 | -2.100004 | -1.434742 |
| C  | -6.373545 | -2.744448 | -1.398361 |
| F  | -7.056746 | -2.418446 | -0.289888 |
| F  | -7.078409 | -2.341552 | -2.445136 |
| F  | -6.265991 | -4.063933 | -1.438244 |
| O  | -4.253662 | -2.319961 | -2.384288 |
| H  | -2.262521 | 1.447071  | 2.341245  |
| H  | -0.003311 | 1.919937  | 1.966880  |
| H  | 0.909239  | 3.632403  | 0.463814  |
| H  | -1.063801 | 4.025904  | 1.899035  |
| H  | -2.133620 | 3.520793  | 0.583321  |
| H  | -1.964107 | 5.993879  | 0.642253  |

|   |           |           |           |
|---|-----------|-----------|-----------|
| H | -0.203256 | 5.906844  | 0.533710  |
| H | -2.199563 | 4.998287  | -1.612750 |
| H | -1.142403 | 6.411626  | -1.702340 |
| H | -0.223892 | 4.458140  | -3.002139 |
| H | 0.868154  | 4.954820  | -1.705543 |
| H | 0.624654  | 2.467364  | -1.770152 |
| H | -1.122031 | 2.620917  | -1.589335 |
| H | 2.431440  | 2.522368  | -0.366173 |
| H | 5.674129  | -0.731963 | -0.286923 |
| H | 2.679029  | -2.103621 | 1.394715  |
| H | 0.593236  | -0.818281 | 1.635328  |
| H | -0.416209 | 0.077399  | -1.292397 |
| H | -2.450390 | -1.205927 | -1.844090 |
| H | -5.419482 | -1.264159 | 0.355571  |

-----  
9-conf08

- Electronic Energy (Eh): -6896.16102261

- Cartesian Coordinates:

|    |           |           |           |
|----|-----------|-----------|-----------|
| Br | 2.784685  | -2.442711 | -1.447866 |
| C  | 2.665671  | -0.621624 | -0.924737 |
| C  | 1.484276  | 0.061674  | -1.172352 |
| C  | 1.330526  | 1.405783  | -0.808800 |
| C  | 0.021747  | 2.113298  | -1.156822 |
| C  | -0.128220 | 3.538893  | -0.569877 |
| C  | -0.313538 | 3.591086  | 0.952492  |
| C  | -0.352802 | 5.033262  | 1.459648  |
| C  | -1.455050 | 5.834318  | 0.766778  |
| C  | -1.316405 | 5.768800  | -0.754302 |
| C  | -1.256643 | 4.323927  | -1.252025 |
| C  | -1.188680 | 1.242643  | -0.862718 |
| C  | -1.311822 | 0.563962  | 0.353743  |
| C  | -2.440249 | -0.193694 | 0.634878  |
| Br | -2.535583 | -1.084053 | 2.308747  |
| C  | -3.493777 | -0.309325 | -0.290993 |
| N  | -4.612845 | -1.088948 | 0.037150  |
| C  | -5.714597 | -1.322623 | -0.719598 |
| C  | -6.750489 | -2.251148 | -0.034435 |
| F  | -6.383462 | -2.597545 | 1.209150  |
| F  | -7.922614 | -1.640103 | 0.040569  |
| F  | -6.892819 | -3.362865 | -0.741817 |
| O  | -5.956374 | -0.905391 | -1.824950 |
| C  | -3.365891 | 0.362590  | -1.512049 |
| C  | -2.230200 | 1.120099  | -1.782892 |
| C  | 2.419073  | 2.029561  | -0.197226 |
| C  | 3.608923  | 1.352051  | 0.058595  |
| C  | 3.756551  | 0.008404  | -0.298084 |
| N  | 4.929294  | -0.723072 | -0.058695 |
| C  | 6.070150  | -0.292618 | 0.536066  |
| C  | 7.163947  | -1.386595 | 0.641786  |
| F  | 7.453577  | -1.609832 | 1.915391  |
| F  | 6.778163  | -2.550363 | 0.095810  |
| F  | 8.261929  | -0.987099 | 0.018227  |
| O  | 6.308321  | 0.805186  | 0.974954  |
| H  | 0.661656  | -0.468224 | -1.656049 |
| H  | 0.044438  | 2.249214  | -2.252467 |
| H  | 0.806781  | 4.074587  | -0.814143 |
| H  | 0.480810  | 3.027185  | 1.466576  |
| H  | -1.264331 | 3.095863  | 1.214063  |
| H  | -0.498154 | 5.044749  | 2.551088  |
| H  | 0.623788  | 5.514052  | 1.269973  |
| H  | -2.437025 | 5.421135  | 1.058442  |
| H  | -1.442763 | 6.881334  | 1.107946  |
| H  | -2.150494 | 6.299909  | -1.238905 |
| H  | -0.393488 | 6.294488  | -1.057857 |
| H  | -1.119833 | 4.305799  | -2.346192 |
| H  | -2.222068 | 3.828463  | -1.047770 |
| H  | -0.509735 | 0.616085  | 1.091765  |
| H  | -4.587010 | -1.525385 | 0.954257  |
| H  | -4.165990 | 0.278790  | -2.243763 |

|   |           |           |           |
|---|-----------|-----------|-----------|
| H | -2.159911 | 1.630595  | -2.746291 |
| H | 2.364179  | 3.077110  | 0.098831  |
| H | 4.439634  | 1.860713  | 0.542117  |
| H | 4.912286  | -1.690012 | -0.370137 |

-----  
9-conf09

- Electronic Energy (Eh): -6896.16066205

- Cartesian Coordinates:

|    |           |           |           |
|----|-----------|-----------|-----------|
| Br | 2.952357  | -2.421583 | -1.335159 |
| C  | 2.812157  | -0.630561 | -0.721284 |
| C  | 1.603761  | 0.031092  | -0.882392 |
| C  | 1.433889  | 1.352460  | -0.449733 |
| C  | 0.095332  | 2.042018  | -0.709143 |
| C  | -0.062241 | 3.435031  | -0.050317 |
| C  | -0.186318 | 3.411867  | 1.478780  |
| C  | -0.236339 | 4.827607  | 2.054900  |
| C  | -1.382495 | 5.634384  | 1.444777  |
| C  | -1.304300 | 5.642785  | -0.081992 |
| C  | -1.234458 | 4.224096  | -0.649029 |
| C  | -1.081012 | 1.129452  | -0.403317 |
| C  | -2.154487 | 1.044137  | -1.290796 |
| C  | -3.260953 | 0.251884  | -1.001830 |
| Br | -4.681194 | 0.190609  | -2.259848 |
| C  | -3.333724 | -0.491250 | 0.187864  |
| N  | -4.467694 | -1.277881 | 0.439168  |
| C  | -4.721378 | -2.050515 | 1.525708  |
| C  | -6.088613 | -2.779534 | 1.460883  |
| F  | -6.759965 | -2.508937 | 0.330531  |
| F  | -5.902718 | -4.089503 | 1.521518  |
| F  | -6.844573 | -2.407621 | 2.483195  |
| O  | -4.023451 | -2.219811 | 2.494271  |
| C  | -2.250146 | -0.413365 | 1.074317  |
| C  | -1.150801 | 0.381265  | 0.775976  |
| C  | 2.533468  | 1.976370  | 0.141637  |
| C  | 3.750440  | 1.320336  | 0.310970  |
| C  | 3.915107  | -0.000626 | -0.116069 |
| N  | 5.116224  | -0.709710 | 0.033243  |
| C  | 6.275779  | -0.272875 | 0.585646  |
| C  | 7.402833  | -1.337851 | 0.583610  |
| F  | 7.774682  | -1.600500 | 1.827833  |
| F  | 7.016936  | -2.490879 | 0.015464  |
| F  | 8.450073  | -0.882611 | -0.087639 |
| O  | 6.508530  | 0.811717  | 1.058975  |
| H  | 0.773103  | -0.498441 | -1.352484 |
| H  | 0.070250  | 2.229647  | -1.797179 |
| H  | 0.849558  | 4.003968  | -0.306580 |
| H  | 0.640466  | 2.843493  | 1.933076  |
| H  | -1.114079 | 2.881617  | 1.753847  |
| H  | -0.337898 | 4.784837  | 3.150480  |
| H  | 0.721200  | 5.339588  | 1.850242  |
| H  | -2.342890 | 5.185586  | 1.755074  |
| H  | -1.378593 | 6.664469  | 1.834266  |
| H  | -2.168333 | 6.176543  | -0.507715 |
| H  | -0.405671 | 6.202796  | -0.396780 |
| H  | -1.142875 | 4.259604  | -1.747600 |
| H  | -2.180201 | 3.698357  | -0.428784 |
| H  | -2.135232 | 1.605572  | -2.226881 |
| H  | -5.181037 | -1.259011 | -0.283839 |
| H  | -2.286205 | -0.987230 | 1.997366  |
| H  | -0.318259 | 0.409053  | 1.481885  |
| H  | 2.465819  | 3.007117  | 0.489614  |
| H  | 4.589789  | 1.828401  | 0.779942  |
| H  | 5.107125  | -1.662739 | -0.318675 |

-----  
9-conf10

- Electronic Energy (Eh): -6896.16089684

- Cartesian Coordinates:

|    |           |          |           |
|----|-----------|----------|-----------|
| Br | -4.954575 | 1.641448 | -0.771429 |
|----|-----------|----------|-----------|

|    |           |           |           |
|----|-----------|-----------|-----------|
| C  | -3.490930 | 0.819840  | 0.117111  |
| C  | -2.342683 | 1.577680  | 0.331495  |
| C  | -1.228251 | 1.030458  | 0.968771  |
| C  | 0.040324  | 1.825420  | 1.271884  |
| C  | 0.099672  | 3.238140  | 0.639190  |
| C  | 0.274014  | 3.253528  | -0.885548 |
| C  | 0.220183  | 4.678485  | -1.438074 |
| C  | 1.273787  | 5.568371  | -0.778687 |
| C  | 1.148147  | 5.542096  | 0.744671  |
| C  | 1.181486  | 4.112665  | 1.287317  |
| C  | 1.294589  | 1.016838  | 0.983696  |
| C  | 1.433137  | 0.298411  | -0.207801 |
| C  | 2.601032  | -0.397619 | -0.487469 |
| Br | 2.715445  | -1.347149 | -2.127274 |
| C  | 3.680382  | -0.408952 | 0.415481  |
| N  | 4.840129  | -1.127987 | 0.090032  |
| C  | 5.978606  | -1.243507 | 0.819159  |
| C  | 7.065285  | -2.114389 | 0.137094  |
| F  | 6.654869  | -2.618330 | -1.037104 |
| F  | 8.148159  | -1.384643 | -0.088693 |
| F  | 7.390208  | -3.127438 | 0.925471  |
| O  | 6.222304  | -0.755576 | 1.894768  |
| C  | 3.537067  | 0.301906  | 1.612601  |
| C  | 2.361816  | 0.996779  | 1.882119  |
| C  | -1.322417 | -0.301474 | 1.391966  |
| C  | -2.463591 | -1.064178 | 1.187856  |
| C  | -3.577964 | -0.515800 | 0.536910  |
| N  | -4.753987 | -1.241055 | 0.294925  |
| C  | -5.015675 | -2.533610 | 0.614980  |
| C  | -6.424115 | -3.007238 | 0.171380  |
| F  | -7.143400 | -2.020936 | -0.386757 |
| F  | -6.309211 | -3.981756 | -0.719674 |
| F  | -7.096718 | -3.462188 | 1.216913  |
| O  | -4.293880 | -3.318947 | 1.177260  |
| H  | -2.342541 | 2.611086  | -0.012670 |
| H  | 0.025780  | 1.993186  | 2.363165  |
| H  | -0.864248 | 3.724972  | 0.874172  |
| H  | -0.484291 | 2.624455  | -1.378041 |
| H  | 1.252765  | 2.810666  | -1.137365 |
| H  | 0.358993  | 4.664158  | -2.530338 |
| H  | -0.783645 | 5.103285  | -1.256791 |
| H  | 2.278043  | 5.208381  | -1.064830 |
| H  | 1.193918  | 6.601286  | -1.152183 |
| H  | 1.950276  | 6.138939  | 1.206131  |
| H  | 0.196015  | 6.018723  | 1.038946  |
| H  | 1.052835  | 4.120423  | 2.382551  |
| H  | 2.174474  | 3.671777  | 1.090460  |
| H  | 0.613174  | 0.270601  | -0.927244 |
| H  | 4.816225  | -1.615769 | -0.800856 |
| H  | 4.357247  | 0.298357  | 2.326691  |
| H  | 2.280539  | 1.539680  | 2.826737  |
| H  | -0.472272 | -0.765246 | 1.897202  |
| H  | -2.509207 | -2.096407 | 1.527191  |
| H  | -5.493489 | -0.729019 | -0.177279 |

-----  
9-conf11

- Electronic Energy (Eh): -6896.16284381

- Cartesian Coordinates:

|    |           |           |           |
|----|-----------|-----------|-----------|
| Br | 2.870861  | -0.937631 | 2.294575  |
| C  | 2.632599  | -0.189266 | 0.566124  |
| C  | 1.502147  | 0.580703  | 0.329698  |
| C  | 1.277697  | 1.155863  | -0.923826 |
| C  | 0.052181  | 2.021098  | -1.177491 |
| C  | 0.102667  | 3.355377  | -0.400817 |
| C  | -1.095899 | 4.251365  | -0.741878 |
| C  | -1.050110 | 5.585190  | 0.003370  |
| C  | 0.260476  | 6.327233  | -0.253164 |
| C  | 1.462447  | 5.446424  | 0.083652  |
| C  | 1.413397  | 4.110841  | -0.658661 |



|    |           |           |           |
|----|-----------|-----------|-----------|
| C  | -1.212934 | 1.206220  | -0.953456 |
| C  | -1.849996 | 1.140016  | 0.287815  |
| C  | -2.969462 | 0.336927  | 0.473294  |
| Br | -3.780264 | 0.305300  | 2.189874  |
| C  | -3.499976 | -0.433292 | -0.575326 |
| N  | -4.631767 | -1.228354 | -0.340916 |
| C  | -5.283848 | -2.027908 | -1.222287 |
| C  | -6.499983 | -2.766017 | -0.605042 |
| F  | -6.318434 | -4.075837 | -0.685188 |
| F  | -6.686521 | -2.453063 | 0.686898  |
| F  | -7.602621 | -2.446615 | -1.265630 |
| O  | -5.024178 | -2.216243 | -2.384686 |
| C  | -2.862928 | -0.363572 | -1.821223 |
| C  | -1.744207 | 0.442217  | -1.994839 |
| C  | 2.220158  | 0.924460  | -1.925171 |
| C  | 3.355694  | 0.151952  | -1.700175 |
| C  | 3.584653  | -0.421202 | -0.444107 |
| N  | 4.709915  | -1.209215 | -0.158888 |
| C  | 5.732442  | -1.530494 | -0.990744 |
| C  | 6.815368  | -2.419481 | -0.326257 |
| F  | 7.978376  | -1.784188 | -0.325070 |
| F  | 6.513756  | -2.730562 | 0.944053  |
| F  | 6.947371  | -3.549797 | -1.003276 |
| O  | 5.880640  | -1.205618 | -2.142682 |
| H  | 0.785499  | 0.723988  | 1.140083  |
| H  | 0.070517  | 2.284247  | -2.248284 |
| H  | 0.068420  | 3.132564  | 0.682962  |
| H  | -2.041679 | 3.731920  | -0.526369 |
| H  | -1.088882 | 4.440687  | -1.831262 |
| H  | -1.910253 | 6.207582  | -0.288798 |
| H  | -1.155901 | 5.397387  | 1.086933  |
| H  | 0.309995  | 6.617169  | -1.317973 |
| H  | 0.293907  | 7.262525  | 0.327312  |
| H  | 2.402488  | 5.970033  | -0.150245 |
| H  | 1.477063  | 5.252637  | 1.171137  |
| H  | 2.275167  | 3.490375  | -0.369938 |
| H  | 1.509670  | 4.290866  | -1.745827 |
| H  | -1.487265 | 1.727603  | 1.132391  |
| H  | -5.001640 | -1.194359 | 0.604614  |
| H  | -3.260189 | -0.949559 | -2.646819 |
| H  | -1.268006 | 0.470387  | -2.977992 |
| H  | 2.073148  | 1.362399  | -2.915323 |
| H  | 4.080044  | -0.016661 | -2.493695 |
| H  | 4.755435  | -1.579707 | 0.785945  |

-----  
9-conf12

- Electronic Energy (Eh): -6896.16284389

- Cartesian Coordinates:

|    |           |           |           |
|----|-----------|-----------|-----------|
| Br | 2.870572  | -0.937973 | 2.294471  |
| C  | 2.632449  | -0.189367 | 0.566105  |
| C  | 1.502011  | 0.580631  | 0.329687  |
| C  | 1.277659  | 1.155940  | -0.923782 |
| C  | 0.052198  | 2.021257  | -1.177415 |
| C  | 0.102793  | 3.355517  | -0.400686 |
| C  | -1.095699 | 4.251599  | -0.741727 |
| C  | -1.049794 | 5.585425  | 0.003513  |
| C  | 0.260849  | 6.327361  | -0.253044 |
| C  | 1.462745  | 5.446452  | 0.083789  |
| C  | 1.413584  | 4.110872  | -0.658521 |
| C  | -1.212973 | 1.206459  | -0.953428 |
| C  | -1.849972 | 1.140119  | 0.287879  |
| C  | -2.969464 | 0.337064  | 0.473314  |
| Br | -3.780216 | 0.305229  | 2.189911  |
| C  | -3.500073 | -0.432982 | -0.575375 |
| N  | -4.631932 | -1.227981 | -0.341053 |
| C  | -5.283666 | -2.027946 | -1.222308 |
| C  | -6.499818 | -2.766076 | -0.605161 |
| F  | -6.687048 | -2.452424 | 0.686515  |
| F  | -7.602233 | -2.447426 | -1.266453 |

|   |           |           |           |
|---|-----------|-----------|-----------|
| F | -6.317774 | -4.075887 | -0.684455 |
| O | -5.023811 | -2.216510 | -2.384635 |
| C | -2.863115 | -0.363118 | -1.821305 |
| C | -1.744353 | 0.442626  | -1.994878 |
| C | 2.220196  | 0.924656  | -1.925090 |
| C | 3.355711  | 0.152123  | -1.700103 |
| C | 3.584575  | -0.421176 | -0.444076 |
| N | 4.709814  | -1.209226 | -0.158874 |
| C | 5.732398  | -1.530421 | -0.990685 |
| C | 6.815208  | -2.419612 | -0.326273 |
| F | 6.513657  | -2.730607 | 0.944073  |
| F | 6.946937  | -3.549970 | -1.003274 |
| F | 7.978345  | -1.784557 | -0.325199 |
| O | 5.880680  | -1.205433 | -2.142584 |
| H | 0.785306  | 0.723817  | 1.140041  |
| H | 0.070559  | 2.284469  | -2.248193 |
| H | 0.068546  | 3.132655  | 0.683081  |
| H | -2.041516 | 3.732230  | -0.526201 |
| H | -1.088689 | 4.440927  | -1.831109 |
| H | -1.909898 | 6.207875  | -0.288642 |
| H | -1.155574 | 5.397645  | 1.087082  |
| H | 0.310391  | 6.617267  | -1.317861 |
| H | 0.294357  | 7.262666  | 0.327405  |
| H | 2.402838  | 5.969970  | -0.150098 |
| H | 1.477328  | 5.252678  | 1.171278  |
| H | 2.275291  | 3.490326  | -0.369793 |
| H | 1.509882  | 4.290898  | -1.745686 |
| H | -1.487172 | 1.727573  | 1.132517  |
| H | -5.001894 | -1.193988 | 0.604446  |
| H | -3.260447 | -0.949002 | -2.646941 |
| H | -1.268209 | 0.470904  | -2.978056 |
| H | 2.073251  | 1.362719  | -2.915197 |
| H | 4.080127  | -0.016415 | -2.493579 |
| H | 4.755309  | -1.579770 | 0.785940  |

-----  
9-conf13

- Electronic Energy (Eh): -6896.16280389

- Cartesian Coordinates:

|    |           |           |           |
|----|-----------|-----------|-----------|
| Br | 2.960580  | -1.009390 | 2.471900  |
| C  | 2.653320  | -0.173358 | 0.795403  |
| C  | 1.527695  | 0.626141  | 0.652167  |
| C  | 1.254605  | 1.265966  | -0.559688 |
| C  | 0.036764  | 2.165176  | -0.710599 |
| C  | 0.157053  | 3.463424  | 0.117748  |
| C  | -1.036307 | 4.397578  | -0.124659 |
| C  | -0.922673 | 5.697606  | 0.671278  |
| C  | 0.390096  | 6.422476  | 0.379000  |
| C  | 1.586870  | 5.503396  | 0.618063  |
| C  | 1.470240  | 4.201676  | -0.175079 |
| C  | -1.232868 | 1.368103  | -0.449411 |
| C  | -1.823203 | 0.664766  | -1.501854 |
| C  | -2.948637 | -0.123334 | -1.295696 |
| Br | -3.692011 | -1.045806 | -2.778476 |
| C  | -3.532932 | -0.240870 | -0.022424 |
| N  | -4.669543 | -1.046730 | 0.141424  |
| C  | -5.366123 | -1.280032 | 1.282112  |
| C  | -6.572896 | -2.233877 | 1.086275  |
| F  | -6.420675 | -3.311481 | 1.841658  |
| F  | -7.692557 | -1.620211 | 1.438762  |
| F  | -6.705257 | -2.636910 | -0.187030 |
| O  | -5.151188 | -0.841300 | 2.384771  |
| C  | -2.943398 | 0.466640  | 1.032412  |
| C  | -1.817098 | 1.252538  | 0.814238  |
| C  | 2.142668  | 1.067445  | -1.616272 |
| C  | 3.272567  | 0.265664  | -1.484877 |
| C  | 3.551037  | -0.371486 | -0.270370 |
| N  | 4.673989  | -1.190578 | -0.078807 |
| C  | 5.647347  | -1.489731 | -0.975240 |
| C  | 6.745027  | -2.426323 | -0.407498 |

|   |           |           |           |
|---|-----------|-----------|-----------|
| F | 6.822253  | -3.525849 | -1.141469 |
| F | 7.918386  | -1.811091 | -0.435579 |
| F | 6.500530  | -2.791352 | 0.860682  |
| O | 5.743945  | -1.114472 | -2.117369 |
| H | 0.852715  | 0.741567  | 1.501826  |
| H | 0.005865  | 2.475012  | -1.768634 |
| H | 0.170983  | 3.194401  | 1.191143  |
| H | -1.981235 | 3.888663  | 0.117916  |
| H | -1.079601 | 4.632746  | -1.204327 |
| H | -1.781904 | 6.349510  | 0.449115  |
| H | -0.978404 | 5.466651  | 1.750174  |
| H | 0.393140  | 6.755704  | -0.674254 |
| H | 0.473816  | 7.331693  | 0.994759  |
| H | 2.525921  | 6.016662  | 0.358587  |
| H | 1.651004  | 5.263632  | 1.694511  |
| H | 2.330878  | 3.551738  | 0.043851  |
| H | 1.516564  | 4.425503  | -1.257439 |
| H | -1.395764 | 0.725609  | -2.504828 |
| H | -5.003696 | -1.507475 | -0.700189 |
| H | -3.384126 | 0.392559  | 2.023852  |
| H | -1.399316 | 1.795018  | 1.664590  |
| H | 1.956846  | 1.556121  | -2.575738 |
| H | 3.954151  | 0.123745  | -2.320338 |
| H | 4.760004  | -1.605327 | 0.844642  |

-----  
9-conf14

- Electronic Energy (Eh): -6896.162575290001  
- Cartesian Coordinates:

|    |           |           |           |
|----|-----------|-----------|-----------|
| Br | -4.407154 | -0.015667 | 2.397763  |
| C  | -3.205402 | 0.172914  | 0.940568  |
| C  | -2.099073 | 1.002184  | 1.097791  |
| C  | -1.183927 | 1.178466  | 0.060503  |
| C  | 0.009106  | 2.106433  | 0.233916  |
| C  | -0.089074 | 3.362134  | -0.660100 |
| C  | 1.077099  | 4.326806  | -0.405497 |
| C  | 0.981604  | 5.587137  | -1.265185 |
| C  | -0.354438 | 6.301575  | -1.068555 |
| C  | -1.524367 | 5.352110  | -1.321292 |
| C  | -1.426017 | 4.089832  | -0.464582 |
| C  | 1.302512  | 1.320307  | 0.076692  |
| C  | 1.853301  | 0.687074  | 1.192982  |
| C  | 3.000713  | -0.088813 | 1.084182  |
| Br | 3.686212  | -0.915297 | 2.649332  |
| C  | 3.648010  | -0.263199 | -0.151388 |
| N  | 4.804519  | -1.054547 | -0.216996 |
| C  | 5.564026  | -1.328584 | -1.307434 |
| C  | 6.772128  | -2.251950 | -1.003518 |
| F  | 6.666852  | -3.373352 | -1.701093 |
| F  | 7.899225  | -1.643700 | -1.340696 |
| F  | 6.851329  | -2.579411 | 0.295719  |
| O  | 5.400788  | -0.946430 | -2.439548 |
| C  | 3.098132  | 0.374672  | -1.270270 |
| C  | 1.948931  | 1.148193  | -1.149615 |
| C  | -1.411498 | 0.492075  | -1.135217 |
| C  | -2.513807 | -0.335339 | -1.304011 |
| C  | -3.437520 | -0.511456 | -0.263464 |
| N  | -4.566589 | -1.336313 | -0.379272 |
| C  | -4.964431 | -2.056712 | -1.458146 |
| C  | -6.272349 | -2.855427 | -1.220991 |
| F  | -6.042462 | -4.150676 | -1.376854 |
| F  | -6.769635 | -2.669375 | 0.011796  |
| F  | -7.194057 | -2.477400 | -2.093997 |
| O  | -4.428058 | -2.136444 | -2.535218 |
| H  | -1.958114 | 1.523165  | 2.046871  |
| H  | -0.017755 | 2.466813  | 1.276024  |
| H  | -0.047070 | 3.043305  | -1.718825 |
| H  | 2.039908  | 3.823586  | -0.580194 |
| H  | 1.065936  | 4.611578  | 0.663039  |
| H  | 1.819257  | 6.263357  | -1.033495 |

|   |           |           |           |
|---|-----------|-----------|-----------|
| H | 1.092071  | 5.308281  | -2.328400 |
| H | -0.412836 | 6.681970  | -0.033016 |
| H | -0.422400 | 7.180430  | -1.728724 |
| H | -2.482431 | 5.860282  | -1.130284 |
| H | -1.533294 | 5.062788  | -2.387333 |
| H | -2.264679 | 3.415441  | -0.694718 |
| H | -1.528030 | 4.361661  | 0.602981  |
| H | 1.377556  | 0.794075  | 2.170026  |
| H | 5.102880  | -1.466771 | 0.662326  |
| H | 3.587992  | 0.256048  | -2.233935 |
| H | 1.562640  | 1.634587  | -2.047337 |
| H | -0.709143 | 0.595731  | -1.964912 |
| H | -2.676235 | -0.860403 | -2.242435 |
| H | -5.153866 | -1.390541 | 0.447930  |

-----  
9-conf15

- Electronic Energy (Eh): -6896.162681349999  
- Cartesian Coordinates:

|    |           |           |           |
|----|-----------|-----------|-----------|
| Br | -4.556886 | -0.164791 | 2.538911  |
| C  | -3.282712 | 0.087312  | 1.154819  |
| C  | -2.172945 | 0.885930  | 1.413576  |
| C  | -1.205398 | 1.105733  | 0.433740  |
| C  | -0.006684 | 1.997786  | 0.720403  |
| C  | -0.031430 | 3.299987  | -0.109878 |
| C  | 1.140050  | 4.222257  | 0.254120  |
| C  | 1.115567  | 5.527797  | -0.540684 |
| C  | -0.213590 | 6.262306  | -0.373801 |
| C  | -1.388523 | 5.355478  | -0.736065 |
| C  | -1.361220 | 4.047967  | 0.055659  |
| C  | 1.278167  | 1.192495  | 0.597176  |
| C  | 1.972402  | 1.072433  | -0.608853 |
| C  | 3.112177  | 0.281927  | -0.700139 |
| Br | 4.002532  | 0.175644  | -2.373657 |
| C  | 3.605890  | -0.422180 | 0.411374  |
| N  | 4.759755  | -1.207853 | 0.271700  |
| C  | 5.384896  | -1.944371 | 1.224563  |
| C  | 6.640494  | -2.691357 | 0.704784  |
| F  | 6.875307  | -2.454654 | -0.595368 |
| F  | 7.707564  | -2.306376 | 1.388776  |
| F  | 6.482438  | -3.997373 | 0.859697  |
| O  | 5.076723  | -2.072351 | 2.383403  |
| C  | 2.911191  | -0.298510 | 1.621556  |
| C  | 1.773064  | 0.494932  | 1.700989  |
| C  | -1.385346 | 0.495170  | -0.810279 |
| C  | -2.490474 | -0.301063 | -1.080364 |
| C  | -3.465922 | -0.521568 | -0.097234 |
| N  | -4.599665 | -1.318701 | -0.315620 |
| C  | -4.952026 | -1.972285 | -1.451226 |
| C  | -6.279904 | -2.762742 | -1.322541 |
| F  | -6.056950 | -4.052338 | -1.528064 |
| F  | -6.839866 | -2.628222 | -0.110097 |
| F  | -7.149206 | -2.330926 | -2.223763 |
| O  | -4.363417 | -2.001481 | -2.503369 |
| H  | -2.070168 | 1.347373  | 2.397683  |
| H  | -0.083470 | 2.303404  | 1.777290  |
| H  | 0.058280  | 3.036124  | -1.180979 |
| H  | 2.100113  | 3.706606  | 0.101847  |
| H  | 1.080018  | 4.450583  | 1.334425  |
| H  | 1.954117  | 6.170895  | -0.231096 |
| H  | 1.274897  | 5.302464  | -1.610414 |
| H  | -0.317477 | 6.588965  | 0.676388  |
| H  | -0.228860 | 7.176071  | -0.988329 |
| H  | -2.344297 | 5.875472  | -0.566693 |
| H  | -1.348425 | 5.122945  | -1.815239 |
| H  | -2.200655 | 3.406417  | -0.252335 |
| H  | -1.512666 | 4.265864  | 1.129632  |
| H  | 1.638502  | 1.607474  | -1.498958 |
| H  | 5.170543  | -1.220260 | -0.657317 |
| H  | 3.279437  | -0.832308 | 2.494581  |

|   |           |           |           |
|---|-----------|-----------|-----------|
| H | 1.252527  | 0.567031  | 2.659146  |
| H | -0.643029 | 0.634692  | -1.598925 |
| H | -2.614998 | -0.767159 | -2.055036 |
| H | -5.228993 | -1.409578 | 0.476770  |

-----  
9-conf16

- Electronic Energy (Eh): -6896.16284389

- Cartesian Coordinates:

|    |           |           |           |
|----|-----------|-----------|-----------|
| Br | 2.869969  | -0.939235 | 2.294058  |
| C  | 2.632223  | -0.189899 | 0.565956  |
| C  | 1.501778  | 0.580102  | 0.329583  |
| C  | 1.277692  | 1.155932  | -0.923695 |
| C  | 0.052266  | 2.021335  | -1.177238 |
| C  | 0.102922  | 3.355480  | -0.400328 |
| C  | -1.095510 | 4.251686  | -0.741281 |
| C  | -1.049578 | 5.585382  | 0.004192  |
| C  | 0.261113  | 6.327298  | -0.252173 |
| C  | 1.462955  | 5.446274  | 0.084545  |
| C  | 1.413762  | 4.110819  | -0.657987 |
| C  | -1.212953 | 1.206573  | -0.953374 |
| C  | -1.850024 | 1.140178  | 0.287887  |
| C  | -2.969555 | 0.337144  | 0.473211  |
| Br | -3.780351 | 0.305207  | 2.189791  |
| C  | -3.500139 | -0.432814 | -0.575562 |
| N  | -4.631977 | -1.227839 | -0.341295 |
| C  | -5.283859 | -2.027560 | -1.222665 |
| C  | -6.499865 | -2.765875 | -0.605409 |
| F  | -7.602447 | -2.447222 | -1.266423 |
| F  | -6.317752 | -4.075670 | -0.684911 |
| F  | -6.686862 | -2.452425 | 0.686341  |
| O  | -5.024128 | -2.215839 | -2.385061 |
| C  | -2.863107 | -0.362871 | -1.821459 |
| C  | -1.744308 | 0.442846  | -1.994914 |
| C  | 2.220503  | 0.925164  | -1.924864 |
| C  | 3.356038  | 0.152644  | -1.699917 |
| C  | 3.584627  | -0.421188 | -0.444087 |
| N  | 4.709795  | -1.209368 | -0.158969 |
| C  | 5.733255  | -1.529067 | -0.990276 |
| C  | 6.815399  | -2.419394 | -0.326312 |
| F  | 7.979260  | -1.785792 | -0.325917 |
| F  | 6.514100  | -2.729968 | 0.944195  |
| F  | 6.945380  | -3.550023 | -1.003319 |
| O  | 5.882531  | -1.202367 | -2.141564 |
| H  | 0.784851  | 0.722887  | 1.139810  |
| H  | 0.070653  | 2.284679  | -2.247984 |
| H  | 0.068626  | 3.132471  | 0.683408  |
| H  | -2.041371 | 3.732332  | -0.525907 |
| H  | -1.088419 | 4.441198  | -1.830628 |
| H  | -1.909629 | 6.207931  | -0.287910 |
| H  | -1.155431 | 5.397421  | 1.087721  |
| H  | 0.310710  | 6.617410  | -1.316931 |
| H  | 0.294643  | 7.262487  | 0.328462  |
| H  | 2.403074  | 5.969795  | -0.149233 |
| H  | 1.477503  | 5.252315  | 1.172001  |
| H  | 2.275438  | 3.490198  | -0.369322 |
| H  | 1.510116  | 4.291017  | -1.745117 |
| H  | -1.487236 | 1.727555  | 1.132584  |
| H  | -5.001861 | -1.193942 | 0.604235  |
| H  | -3.260432 | -0.948656 | -2.647167 |
| H  | -1.268100 | 0.471165  | -2.978059 |
| H  | 2.073779  | 1.363644  | -2.914819 |
| H  | 4.080721  | -0.015387 | -2.493257 |
| H  | 4.754849  | -1.580689 | 0.785561  |

-----  
9-conf17

- Electronic Energy (Eh): -6896.16268164

- Cartesian Coordinates:

|    |          |          |          |
|----|----------|----------|----------|
| Br | 4.001956 | 0.174836 | 2.373941 |
|----|----------|----------|----------|

|    |           |           |           |
|----|-----------|-----------|-----------|
| C  | 3.111923  | 0.281584  | 0.700274  |
| C  | 1.972165  | 1.072106  | 0.608999  |
| C  | 1.278143  | 1.192491  | -0.597126 |
| C  | -0.006665 | 1.997840  | -0.720327 |
| C  | -0.031299 | 3.300024  | 0.109991  |
| C  | -1.361011 | 4.048129  | -0.055590 |
| C  | -1.388236 | 5.355619  | 0.736173  |
| C  | -0.213200 | 6.262346  | 0.373993  |
| C  | 1.115884  | 5.527709  | 0.540897  |
| C  | 1.140282  | 4.222186  | -0.253941 |
| C  | -1.205432 | 1.105860  | -0.433673 |
| C  | -2.172889 | 0.885973  | -1.413584 |
| C  | -3.282677 | 0.087377  | -1.154866 |
| Br | -4.556706 | -0.164863 | -2.539070 |
| C  | -3.466017 | -0.521392 | 0.097228  |
| N  | -4.599768 | -1.318539 | 0.315539  |
| C  | -4.952311 | -1.971921 | 1.451206  |
| C  | -6.279973 | -2.762711 | 1.322316  |
| F  | -6.840249 | -2.627575 | 0.110078  |
| F  | -6.056510 | -4.052398 | 1.526890  |
| F  | -7.149202 | -2.331843 | 2.224016  |
| O  | -4.363922 | -2.000851 | 2.503478  |
| C  | -2.490672 | -0.300791 | 1.080432  |
| C  | -1.385516 | 0.495418  | 0.810381  |
| C  | 1.773251  | 0.495244  | -1.701036 |
| C  | 2.911380  | -0.298203 | -1.621617 |
| C  | 3.605859  | -0.422209 | -0.411345 |
| N  | 4.759734  | -1.207878 | -0.271673 |
| C  | 5.385139  | -1.944010 | -1.224648 |
| C  | 6.640686  | -2.691072 | -0.704873 |
| F  | 6.874875  | -2.455239 | 0.595550  |
| F  | 6.482989  | -3.997025 | -0.860786 |
| F  | 7.707952  | -2.305357 | -1.388133 |
| O  | 5.077275  | -2.071558 | -2.383625 |
| H  | 1.638100  | 1.606904  | 1.499188  |
| H  | -0.083448 | 2.303500  | -1.777201 |
| H  | 0.058359  | 3.036126  | 1.181089  |
| H  | -2.200524 | 3.406645  | -0.252327 |
| H  | -1.512368 | 4.266078  | -1.129566 |
| H  | -2.343951 | 5.875708  | 0.566765  |
| H  | -1.348219 | 5.123051  | 1.815343  |
| H  | -0.317014 | 6.589062  | -0.676184 |
| H  | -0.228406 | 7.176084  | 0.988562  |
| H  | 1.954502  | 6.170739  | 0.231353  |
| H  | 1.275160  | 5.302334  | 1.610627  |
| H  | 2.100289  | 3.706441  | -0.101635 |
| H  | 1.080318  | 4.450547  | -1.334245 |
| H  | -2.070013 | 1.347323  | -2.397723 |
| H  | -5.229030 | -1.409450 | -0.476898 |
| H  | -2.615294 | -0.766776 | 2.055143  |
| H  | -0.643296 | 0.635013  | 1.599105  |
| H  | 1.252904  | 0.567614  | -2.659276 |
| H  | 3.279795  | -0.831757 | -2.494718 |
| H  | 5.170227  | -1.220672 | 0.657471  |

-----  
9-conf18

- Electronic Energy (Eh): -6896.16257559

- Cartesian Coordinates:

|    |           |           |           |
|----|-----------|-----------|-----------|
| Br | -3.686333 | -0.914661 | 2.649440  |
| C  | -3.000693 | -0.088526 | 1.084163  |
| C  | -1.853325 | 0.687432  | 1.192913  |
| C  | -1.302451 | 1.320431  | 0.076533  |
| C  | -0.009085 | 2.106636  | 0.233711  |
| C  | 0.088994  | 3.362314  | -0.660339 |
| C  | 1.425860  | 4.090134  | -0.464803 |
| C  | 1.524091  | 5.352402  | -1.321538 |
| C  | 0.354076  | 6.301767  | -1.068814 |
| C  | -0.981901 | 5.587200  | -1.265447 |
| C  | -1.077278 | 4.326863  | -0.405754 |

|    |           |           |           |
|----|-----------|-----------|-----------|
| C  | 1.184010  | 1.178744  | 0.060303  |
| C  | 2.099004  | 1.002309  | 1.097698  |
| C  | 3.205356  | 0.173059  | 0.940524  |
| Br | 4.406898  | -0.015711 | 2.397868  |
| C  | 3.437685  | -0.511101 | -0.263579 |
| N  | 4.566772  | -1.335911 | -0.379364 |
| C  | 4.964413  | -2.056730 | -1.458049 |
| C  | 6.272099  | -2.855768 | -1.220677 |
| F  | 7.193628  | -2.478920 | -2.094352 |
| F  | 6.769918  | -2.668877 | 0.011753  |
| F  | 6.041571  | -4.151072 | -1.375333 |
| O  | 4.428013  | -2.136626 | -2.535088 |
| C  | 2.514146  | -0.334797 | -1.304252 |
| C  | 1.411784  | 0.492547  | -1.135495 |
| C  | -1.948753 | 1.148042  | -1.149799 |
| C  | -3.097906 | 0.374448  | -1.270403 |
| C  | -3.647865 | -0.263207 | -0.151433 |
| N  | -4.804323 | -1.054632 | -0.216952 |
| C  | -5.563558 | -1.329225 | -1.307444 |
| C  | -6.771692 | -2.252522 | -1.003422 |
| F  | -6.851238 | -2.579402 | 0.295955  |
| F  | -7.898734 | -1.644533 | -1.341191 |
| F  | -6.666164 | -3.374256 | -1.700430 |
| O  | -5.400037 | -0.947597 | -2.439698 |
| H  | -1.377681 | 0.794668  | 2.169980  |
| H  | 0.017767  | 2.467043  | 1.275810  |
| H  | 0.047028  | 3.043437  | -1.719049 |
| H  | 2.264584  | 3.415816  | -0.694916 |
| H  | 1.527826  | 4.361993  | 0.602755  |
| H  | 2.482114  | 5.860656  | -1.130540 |
| H  | 1.533039  | 5.063068  | -2.387575 |
| H  | 0.412433  | 6.682170  | -0.033275 |
| H  | 0.421963  | 7.180627  | -1.728984 |
| H  | -1.819625 | 6.263338  | -1.033774 |
| H  | -1.092328 | 5.308326  | -2.328662 |
| H  | -2.040031 | 3.823541  | -0.580465 |
| H  | -1.066157 | 4.611643  | 0.662778  |
| H  | 1.957896  | 1.523114  | 2.046852  |
| H  | 5.154152  | -1.389962 | 0.447781  |
| H  | 2.676744  | -0.859714 | -2.242735 |
| H  | 0.709577  | 0.596328  | -1.965298 |
| H  | -1.562387 | 1.634268  | -2.047580 |
| H  | -3.587677 | 0.255562  | -2.234082 |
| H  | -5.102876 | -1.466463 | 0.662487  |

-----  
9-conf19

- Electronic Energy (Eh): -6896.1626814

- Cartesian Coordinates:

|    |           |           |           |
|----|-----------|-----------|-----------|
| Br | -4.556624 | -0.164865 | 2.539060  |
| C  | -3.282648 | 0.087456  | 1.154825  |
| C  | -2.172862 | 0.886063  | 1.413537  |
| C  | -1.205449 | 1.106018  | 0.433601  |
| C  | -0.006685 | 1.997998  | 0.720265  |
| C  | -0.031300 | 3.300194  | -0.110033 |
| C  | 1.140280  | 4.222347  | 0.253917  |
| C  | 1.115907  | 5.527861  | -0.540935 |
| C  | -0.213174 | 6.262513  | -0.374071 |
| C  | -1.388222 | 5.355791  | -0.736235 |
| C  | -1.361007 | 4.048309  | 0.055543  |
| C  | 1.278137  | 1.192652  | 0.597107  |
| C  | 1.972139  | 1.072183  | -0.609023 |
| C  | 3.111909  | 0.281677  | -0.700258 |
| Br | 4.001919  | 0.174815  | -2.373926 |
| C  | 3.605879  | -0.422005 | 0.411418  |
| N  | 4.759735  | -1.207716 | 0.271788  |
| C  | 5.385189  | -1.943752 | 1.224814  |
| C  | 6.640333  | -2.691387 | 0.704893  |
| F  | 7.707442  | -2.308141 | 1.389700  |
| F  | 6.480904  | -3.997452 | 0.858464  |

|   |           |           |           |
|---|-----------|-----------|-----------|
| F | 6.875888  | -2.453695 | -0.594941 |
| O | 5.077439  | -2.071118 | 2.383841  |
| C | 2.911436  | -0.297908 | 1.621695  |
| C | 1.773281  | 0.495512  | 1.701065  |
| C | -1.385577 | 0.495644  | -0.810485 |
| C | -2.490733 | -0.300565 | -1.080531 |
| C | -3.466025 | -0.521246 | -0.097290 |
| N | -4.599783 | -1.318378 | -0.315625 |
| C | -4.952125 | -1.972055 | -1.451178 |
| C | -6.279707 | -2.762965 | -1.322268 |
| F | -6.840263 | -2.627429 | -0.110209 |
| F | -7.148802 | -2.332560 | -2.224330 |
| F | -6.056024 | -4.052697 | -1.526298 |
| O | -4.363605 | -2.001165 | -2.503376 |
| H | -2.069954 | 1.347361  | 2.397697  |
| H | -0.083492 | 2.303659  | 1.777137  |
| H | 0.058368  | 3.036326  | -1.181137 |
| H | 2.100289  | 3.706594  | 0.101638  |
| H | 1.080300  | 4.450716  | 1.334218  |
| H | 1.954518  | 6.170892  | -0.231374 |
| H | 1.275213  | 5.302472  | -1.610657 |
| H | -0.316998 | 6.589268  | 0.676093  |
| H | -0.228361 | 7.176228  | -0.988674 |
| H | -2.343927 | 5.875896  | -0.566823 |
| H | -1.348216 | 5.123209  | -1.815402 |
| H | -2.200527 | 3.406828  | -0.252364 |
| H | -1.512361 | 4.266268  | 1.129517  |
| H | 1.638042  | 1.606902  | -1.499246 |
| H | 5.170343  | -1.220410 | -0.657308 |
| H | 3.279896  | -0.831358 | 2.494842  |
| H | 1.252949  | 0.567948  | 2.659308  |
| H | -0.643404 | 0.635308  | -1.599240 |
| H | -2.615388 | -0.766502 | -2.055262 |
| H | -5.229123 | -1.409175 | 0.476765  |

-----  
9-conf20

- Electronic Energy (Eh): -6896.1608970199995

- Cartesian Coordinates:

|    |           |           |           |
|----|-----------|-----------|-----------|
| Br | 2.715241  | -1.347355 | 2.127195  |
| C  | 2.600963  | -0.397671 | 0.487467  |
| C  | 1.433064  | 0.298335  | 0.207738  |
| C  | 1.294604  | 1.016843  | -0.983717 |
| C  | 0.040352  | 1.825439  | -1.271941 |
| C  | 0.099688  | 3.238168  | -0.639274 |
| C  | 1.181366  | 4.112747  | -1.287565 |
| C  | 1.148051  | 5.542179  | -0.744921 |
| C  | 1.273902  | 5.568471  | 0.778420  |
| C  | 0.220427  | 4.678548  | 1.437961  |
| C  | 0.274237  | 3.253586  | 0.885442  |
| C  | -1.228226 | 1.030489  | -0.968828 |
| C  | -2.342558 | 1.577660  | -0.331333 |
| C  | -3.490799 | 0.819825  | -0.116891 |
| Br | -4.954315 | 1.641358  | 0.771933  |
| C  | -3.577919 | -0.515756 | -0.536858 |
| N  | -4.753926 | -1.241020 | -0.294802 |
| C  | -5.015776 | -2.533443 | -0.615261 |
| C  | -6.424180 | -3.007122 | -0.171589 |
| F  | -7.143252 | -2.021015 | 0.387174  |
| F  | -7.097046 | -3.461495 | -1.217199 |
| F  | -6.309206 | -3.982086 | 0.718973  |
| O  | -4.294151 | -3.318629 | -1.177968 |
| C  | -2.463650 | -1.064078 | -1.188023 |
| C  | -1.322483 | -0.301379 | -1.392197 |
| C  | 2.361931  | 0.996916  | -1.882030 |
| C  | 3.537180  | 0.302074  | -1.612451 |
| C  | 3.680397  | -0.408887 | -0.415376 |
| N  | 4.840134  | -1.127922 | -0.089892 |
| C  | 5.978658  | -1.243360 | -0.818954 |
| C  | 7.065191  | -2.114531 | -0.137037 |

|   |           |           |           |
|---|-----------|-----------|-----------|
| F | 8.148334  | -1.385140 | 0.088509  |
| F | 6.654816  | -2.618291 | 1.037251  |
| F | 7.389615  | -3.127742 | -0.925447 |
| O | 6.222469  | -0.755222 | -1.894444 |
| H | 0.613051  | 0.270476  | 0.927123  |
| H | 0.025816  | 1.993164  | -2.363228 |
| H | -0.864298 | 3.724936  | -0.874127 |
| H | 1.052541  | 4.120496  | -2.382778 |
| H | 2.174406  | 3.671907  | -1.090862 |
| H | 1.950090  | 6.139051  | -1.206500 |
| H | 0.195859  | 6.018767  | -1.039064 |
| H | 2.278212  | 5.208525  | 1.064426  |
| H | 1.194042  | 6.601384  | 1.151922  |
| H | 0.359393  | 4.664231  | 2.530206  |
| H | -0.783442 | 5.103310  | 1.256819  |
| H | -0.483984 | 2.624503  | 1.378050  |
| H | 1.253030  | 2.810754  | 1.137143  |
| H | -2.342341 | 2.611024  | 0.012963  |
| H | -5.493304 | -0.729078 | 0.177693  |
| H | -2.509328 | -2.096256 | -1.527500 |
| H | -0.472413 | -0.765111 | -1.897596 |
| H | 2.280722  | 1.539903  | -2.826605 |
| H | 4.357451  | 0.298639  | -2.326438 |
| H | 4.816198  | -1.615720 | 0.800987  |

-----  
9-conf21

- Electronic Energy (Eh): -6896.1608963

- Cartesian Coordinates:

|    |           |           |           |
|----|-----------|-----------|-----------|
| Br | 2.716311  | -1.346121 | 2.127820  |
| C  | 2.601479  | -0.397024 | 0.487788  |
| C  | 1.433475  | 0.298847  | 0.208180  |
| C  | 1.294617  | 1.016927  | -0.983489 |
| C  | 0.040225  | 1.825313  | -1.271644 |
| C  | 0.099366  | 3.238057  | -0.638964 |
| C  | 1.181413  | 4.112537  | -1.286762 |
| C  | 1.147931  | 5.541993  | -0.744192 |
| C  | 1.273020  | 5.568333  | 0.779212  |
| C  | 0.219122  | 4.678533  | 1.438245  |
| C  | 0.273121  | 3.253529  | 0.885831  |
| C  | -1.228245 | 1.030194  | -0.968499 |
| C  | -2.343126 | 1.577669  | -0.332177 |
| C  | -3.491276 | 0.819742  | -0.117697 |
| Br | -4.955535 | 1.641718  | 0.769513  |
| C  | -3.577818 | -0.516266 | -0.536461 |
| N  | -4.753785 | -1.241573 | -0.294442 |
| C  | -5.015145 | -2.534337 | -0.613875 |
| C  | -6.423801 | -3.007877 | -0.170873 |
| F  | -7.143106 | -2.021635 | 0.387349  |
| F  | -7.096135 | -3.462346 | -1.216796 |
| F  | -6.309353 | -3.982712 | 0.719878  |
| O  | -4.292981 | -3.319892 | -1.175386 |
| C  | -2.463021 | -1.064895 | -1.186444 |
| C  | -1.321917 | -0.302086 | -1.390650 |
| C  | 2.361671  | 0.996730  | -1.882116 |
| C  | 3.537025  | 0.302012  | -1.612667 |
| C  | 3.680633  | -0.408535 | -0.415390 |
| N  | 4.840492  | -1.127392 | -0.089990 |
| C  | 5.978466  | -1.243805 | -0.819762 |
| C  | 7.065376  | -2.114354 | -0.137639 |
| F  | 7.390479  | -3.127423 | -0.925883 |
| F  | 8.148091  | -1.384294 | 0.088003  |
| F  | 6.655116  | -2.618188 | 1.036661  |
| O  | 6.221613  | -0.756791 | -1.895909 |
| H  | 0.613670  | 0.271174  | 0.927809  |
| H  | 0.025636  | 1.993084  | -2.362922 |
| H  | -0.864470 | 3.724881  | -0.874317 |
| H  | 1.053129  | 4.120247  | -2.382036 |
| H  | 2.174324  | 3.671636  | -1.089555 |
| H  | 1.950239  | 6.138785  | -1.205403 |

|   |           |           |           |
|---|-----------|-----------|-----------|
| H | 0.195921  | 6.018644  | -1.038825 |
| H | 2.277150  | 5.208298  | 1.065741  |
| H | 1.193077  | 6.601265  | 1.152637  |
| H | 0.357493  | 4.664260  | 2.530563  |
| H | -0.784616 | 5.103366  | 1.256539  |
| H | -0.485404 | 2.624525  | 1.378068  |
| H | 1.251770  | 2.810695  | 1.138089  |
| H | -2.343403 | 2.611362  | 0.011118  |
| H | -5.493521 | -0.729402 | 0.177252  |
| H | -2.508241 | -2.097408 | -1.524966 |
| H | -0.471455 | -0.766118 | -1.895105 |
| H | 2.280158  | 1.539395  | -2.826849 |
| H | 4.357052  | 0.298287  | -2.326934 |
| H | 4.816938  | -1.614661 | 0.801188  |

-----  
10-conf01

- Electronic Energy (Eh): -6779.416268370001

- Cartesian Coordinates:

|    |           |           |           |
|----|-----------|-----------|-----------|
| Br | -2.876080 | -0.485694 | 2.291027  |
| C  | -2.641823 | 0.273604  | 0.566859  |
| C  | -1.507002 | 1.037025  | 0.329720  |
| C  | -1.284777 | 1.619239  | -0.921025 |
| C  | -0.054211 | 2.477299  | -1.175500 |
| C  | -0.097509 | 3.816943  | -0.400854 |
| C  | -1.402756 | 4.566891  | -0.669894 |
| C  | 1.106116  | 4.694338  | -0.747995 |
| C  | 1.205341  | 1.653788  | -0.951887 |
| C  | 1.845464  | 1.585601  | 0.287656  |
| C  | 2.958252  | 0.772758  | 0.472326  |
| Br | 3.772945  | 0.737578  | 2.186942  |
| C  | 3.478862  | -0.005078 | -0.575564 |
| N  | 4.603837  | -0.809955 | -0.342181 |
| C  | 5.245974  | -1.617944 | -1.223274 |
| C  | 6.456649  | -2.366134 | -0.607409 |
| F  | 6.262460  | -3.674327 | -0.684203 |
| F  | 6.649337  | -2.052087 | 0.683342  |
| F  | 7.560541  | -2.058596 | -1.271468 |
| O  | 4.981347  | -1.806658 | -2.384470 |
| C  | 2.838986  | 0.067004  | -1.819974 |
| C  | 1.726932  | 0.881969  | -1.992646 |
| C  | -2.234214 | 1.401389  | -1.918965 |
| C  | -3.374148 | 0.635624  | -1.693261 |
| C  | -3.600815 | 0.055565  | -0.439911 |
| N  | -4.730146 | -0.726348 | -0.154326 |
| C  | -5.759598 | -1.033914 | -0.982941 |
| C  | -6.844759 | -1.921080 | -0.319622 |
| F  | -6.543033 | -2.236059 | 0.949685  |
| F  | -6.980525 | -3.049516 | -0.999189 |
| F  | -8.005774 | -1.282447 | -0.316141 |
| O  | -5.911507 | -0.699418 | -2.131611 |
| H  | -0.784575 | 1.168350  | 1.137026  |
| H  | -0.071299 | 2.739978  | -2.246756 |
| H  | -0.066009 | 3.590810  | 0.680458  |
| H  | -1.412826 | 5.527672  | -0.134306 |
| H  | -1.514691 | 4.783422  | -1.745410 |
| H  | -2.283682 | 3.992516  | -0.350082 |
| H  | 2.062496  | 4.199772  | -0.527242 |
| H  | 1.100997  | 4.947983  | -1.820795 |
| H  | 1.075331  | 5.637684  | -0.182757 |
| H  | 1.490199  | 2.177989  | 1.132069  |
| H  | 4.976513  | -0.777104 | 0.602281  |
| H  | 3.228637  | -0.524804 | -2.645039 |
| H  | 1.247884  | 0.911096  | -2.974401 |
| H  | -2.089039 | 1.844343  | -2.907174 |
| H  | -4.103664 | 0.477519  | -2.484208 |
| H  | -4.773931 | -1.102445 | 0.788369  |

-----  
10-conf02

- Electronic Energy (Eh): -6779.41627266

- Cartesian Coordinates:

|    |           |           |           |
|----|-----------|-----------|-----------|
| Br | 2.980590  | -1.173342 | -2.292898 |
| C  | 2.670782  | 0.079808  | -0.901011 |
| C  | 1.538712  | 0.879970  | -0.971992 |
| C  | 1.262851  | 1.819100  | 0.025339  |
| C  | 0.036439  | 2.715212  | -0.063792 |
| C  | 0.143697  | 3.752440  | -1.207943 |
| C  | 1.447577  | 4.545607  | -1.111534 |
| C  | -1.059224 | 4.696827  | -1.210478 |
| C  | -1.224385 | 1.863824  | -0.097767 |
| C  | -1.800917 | 1.455132  | 1.107179  |
| C  | -2.916075 | 0.626847  | 1.124201  |
| Br | -3.640706 | 0.118723  | 2.803117  |
| C  | -3.503466 | 0.170551  | -0.068877 |
| N  | -4.628742 | -0.664794 | -0.006336 |
| C  | -5.323402 | -1.202999 | -1.040112 |
| C  | -6.513265 | -2.089849 | -0.590541 |
| F  | -6.648111 | -2.126263 | 0.744312  |
| F  | -6.333640 | -3.331619 | -1.016303 |
| F  | -7.641467 | -1.622049 | -1.102518 |
| O  | -5.116745 | -1.070469 | -2.220873 |
| C  | -2.928210 | 0.582912  | -1.277033 |
| C  | -1.812194 | 1.412748  | -1.281958 |
| C  | 2.155416  | 1.917856  | 1.092221  |
| C  | 3.291795  | 1.118770  | 1.175180  |
| C  | 3.572752  | 0.181373  | 0.174732  |
| N  | 4.702034  | -0.650732 | 0.204861  |
| C  | 5.677287  | -0.694652 | 1.147017  |
| C  | 6.778490  | -1.745122 | 0.849840  |
| F  | 6.834505  | -2.628573 | 1.835256  |
| F  | 7.955186  | -1.145311 | 0.746910  |
| F  | 6.553734  | -2.413184 | -0.292305 |
| O  | 5.771170  | -0.028766 | 2.148184  |
| H  | 0.860293  | 0.757449  | -1.817941 |
| H  | 0.003566  | 3.294855  | 0.874304  |
| H  | 0.161418  | 3.205359  | -2.167682 |
| H  | 1.501923  | 5.296747  | -1.913352 |
| H  | 1.510080  | 5.080279  | -0.148990 |
| H  | 2.332676  | 3.899071  | -1.194005 |
| H  | -2.012089 | 4.160608  | -1.321802 |
| H  | -1.103710 | 5.266548  | -0.267668 |
| H  | -0.981933 | 5.422188  | -2.034041 |
| H  | -1.370188 | 1.782663  | 2.055632  |
| H  | -4.955569 | -0.889110 | 0.929145  |
| H  | -3.371480 | 0.244628  | -2.210731 |
| H  | -1.405426 | 1.716611  | -2.248454 |
| H  | 1.967706  | 2.643928  | 1.886916  |
| H  | 3.976344  | 1.211088  | 2.015135  |
| H  | 4.792208  | -1.293827 | -0.576476 |

-----  
10-conf03

- Electronic Energy (Eh): -6779.41604839

- Cartesian Coordinates:

|    |           |           |           |
|----|-----------|-----------|-----------|
| Br | 3.639792  | -0.558470 | -2.545364 |
| C  | 2.970561  | -0.694450 | -0.774433 |
| C  | 1.830831  | -1.457575 | -0.553639 |
| C  | 1.292742  | -1.596038 | 0.727856  |
| C  | 0.007566  | -2.390585 | 0.909039  |
| C  | -0.075807 | -3.186593 | 2.233964  |
| C  | 1.100773  | -4.153994 | 2.370004  |
| C  | -1.403449 | -3.937906 | 2.340814  |
| C  | -1.194455 | -1.481281 | 0.701288  |
| C  | -2.115661 | -1.748665 | -0.311062 |
| C  | -3.228925 | -0.934758 | -0.497001 |
| Br | -4.437850 | -1.363752 | -1.896205 |
| C  | -3.462292 | 0.179049  | 0.325779  |
| N  | -4.597666 | 0.972914  | 0.104156  |
| C  | -4.992634 | 2.072461  | 0.794429  |

|   |           |           |           |
|---|-----------|-----------|-----------|
| C | -6.308033 | 2.697956  | 0.262033  |
| F | -6.815359 | 2.016435  | -0.777125 |
| F | -6.085226 | 3.941759  | -0.135710 |
| F | -7.219052 | 2.713831  | 1.223364  |
| O | -4.448678 | 2.590774  | 1.737585  |
| C | -2.533204 | 0.447539  | 1.341471  |
| C | -1.423962 | -0.369452 | 1.516183  |
| C | 1.943381  | -0.942455 | 1.777012  |
| C | 3.084993  | -0.176379 | 1.567889  |
| C | 3.622642  | -0.035725 | 0.282526  |
| N | 4.771956  | 0.723004  | 0.015577  |
| C | 5.537606  | 1.411930  | 0.898910  |
| C | 6.744618  | 2.130804  | 0.242426  |
| F | 6.679482  | 3.431204  | 0.483249  |
| F | 6.781477  | 1.957395  | -1.088002 |
| F | 7.875773  | 1.659192  | 0.746462  |
| O | 5.384070  | 1.514009  | 2.090677  |
| H | 1.350994  | -1.949729 | -1.402140 |
| H | -0.017936 | -3.139921 | 0.099652  |
| H | -0.036116 | -2.466933 | 3.071115  |
| H | 1.041737  | -4.706652 | 3.319437  |
| H | 1.088360  | -4.893528 | 1.552392  |
| H | 2.071046  | -3.638670 | 2.339426  |
| H | -2.266169 | -3.256756 | 2.333619  |
| H | -1.523117 | -4.642487 | 1.500740  |
| H | -1.442155 | -4.521787 | 3.272286  |
| H | -1.973466 | -2.609262 | -0.967733 |
| H | -5.191370 | 0.680148  | -0.666316 |
| H | -2.696553 | 1.308217  | 1.985937  |
| H | -0.717384 | -0.120918 | 2.310842  |
| H | 1.566617  | -1.031106 | 2.797757  |
| H | 3.578421  | 0.321793  | 2.399235  |
| H | 5.058400  | 0.754062  | -0.958626 |

-----  
10-conf04

- Electronic Energy (Eh): -6779.414579240001

- Cartesian Coordinates:

|    |           |           |           |
|----|-----------|-----------|-----------|
| Br | -2.649933 | -0.820818 | 2.279051  |
| C  | -2.518611 | 0.237697  | 0.708743  |
| C  | -1.367600 | 0.988410  | 0.513042  |
| C  | -1.216680 | 1.786105  | -0.625721 |
| C  | 0.019756  | 2.647284  | -0.822685 |
| C  | -0.092487 | 4.004779  | -0.076629 |
| C  | -0.261222 | 3.873210  | 1.438392  |
| C  | -1.211362 | 4.866984  | -0.663197 |
| C  | 1.306729  | 1.867046  | -0.559031 |
| C  | 1.416959  | 0.562834  | -1.058772 |
| C  | 2.578994  | -0.176436 | -0.893940 |
| Br | 2.639319  | -1.937528 | -1.600397 |
| C  | 3.693213  | 0.354031  | -0.218187 |
| N  | 4.845296  | -0.431833 | -0.067834 |
| C  | 6.004500  | -0.096719 | 0.552351  |
| C  | 7.068896  | -1.224027 | 0.526126  |
| F  | 8.159656  | -0.798007 | -0.093187 |
| F  | 6.634714  | -2.323023 | -0.110179 |
| F  | 7.388458  | -1.568951 | 1.764598  |
| O  | 6.279053  | 0.943095  | 1.098127  |
| C  | 3.588962  | 1.657950  | 0.275143  |
| C  | 2.418307  | 2.392575  | 0.101804  |
| C  | -2.255046 | 1.789632  | -1.557758 |
| C  | -3.413279 | 1.040737  | -1.372164 |
| C  | -3.568553 | 0.249250  | -0.228337 |
| N  | -4.711649 | -0.527206 | 0.012666  |
| C  | -5.817347 | -0.643118 | -0.765359 |
| C  | -6.894115 | -1.589273 | -0.173776 |
| F  | -6.507744 | -2.141737 | 0.986694  |
| F  | -7.150390 | -2.568757 | -1.027324 |
| F  | -8.011761 | -0.913135 | 0.048553  |
| O  | -6.039649 | -0.105418 | -1.821635 |

|   |           |           |           |
|---|-----------|-----------|-----------|
| H | -0.569531 | 0.938703  | 1.255429  |
| H | 0.048549  | 2.904446  | -1.896132 |
| H | 0.852124  | 4.539041  | -0.273206 |
| H | -0.178725 | 4.860512  | 1.917053  |
| H | -1.252184 | 3.466411  | 1.692002  |
| H | 0.496070  | 3.217489  | 1.893002  |
| H | -1.088245 | 5.009180  | -1.748117 |
| H | -2.200376 | 4.414287  | -0.490977 |
| H | -1.215920 | 5.861764  | -0.193320 |
| H | 0.575822  | 0.109028  | -1.585953 |
| H | 4.796007  | -1.361592 | -0.474524 |
| H | 4.438271  | 2.090110  | 0.799138  |
| H | 2.397545  | 3.405521  | 0.503654  |
| H | -2.163853 | 2.394905  | -2.462775 |
| H | -4.210112 | 1.056645  | -2.112017 |
| H | -4.701249 | -1.063687 | 0.875448  |

-----  
10-conf05

- Electronic Energy (Eh): -6779.414395

- Cartesian Coordinates:

|    |           |           |           |
|----|-----------|-----------|-----------|
| Br | -4.942825 | 1.868619  | 0.940594  |
| C  | -3.453839 | 1.146450  | 0.008849  |
| C  | -2.325791 | 1.947324  | -0.150177 |
| C  | -1.194969 | 1.472899  | -0.816441 |
| C  | 0.051967  | 2.319506  | -1.063999 |
| C  | 0.080759  | 3.690360  | -0.334620 |
| C  | 1.155083  | 4.606782  | -0.922407 |
| C  | 0.244686  | 3.587743  | 1.183489  |
| C  | 1.326768  | 1.525544  | -0.831137 |
| C  | 1.490559  | 0.742100  | 0.315447  |
| C  | 2.675538  | 0.056828  | 0.545801  |
| Br | 2.823355  | -0.985608 | 2.125363  |
| C  | 3.747663  | 0.121880  | -0.363476 |
| N  | 4.924556  | -0.590019 | -0.088239 |
| C  | 6.056944  | -0.644613 | -0.833863 |
| C  | 7.164440  | -1.535270 | -0.213570 |
| F  | 6.785126  | -2.087901 | 0.949136  |
| F  | 8.248998  | -0.809405 | 0.014248  |
| F  | 7.474202  | -2.514839 | -1.049509 |
| O  | 6.280151  | -0.094148 | -1.883375 |
| C  | 3.579594  | 0.898449  | -1.515733 |
| C  | 2.387492  | 1.581871  | -1.735924 |
| C  | -1.252046 | 0.169102  | -1.325777 |
| C  | -2.372675 | -0.635586 | -1.177190 |
| C  | -3.503532 | -0.160777 | -0.497469 |
| N  | -4.660499 | -0.931248 | -0.309691 |
| C  | -4.889989 | -2.202773 | -0.724715 |
| C  | -6.293923 | -2.735938 | -0.337959 |
| F  | -6.172104 | -3.825441 | 0.405046  |
| F  | -6.975910 | -3.039548 | -1.432535 |
| F  | -7.008608 | -1.838093 | 0.358341  |
| O  | -4.147222 | -2.927662 | -1.338493 |
| H  | -2.355527 | 2.955610  | 0.260673  |
| H  | 0.030903  | 2.560175  | -2.141332 |
| H  | -0.889936 | 4.169782  | -0.546307 |
| H  | 1.101419  | 5.605274  | -0.463587 |
| H  | 2.165778  | 4.210540  | -0.737589 |
| H  | 1.033042  | 4.730144  | -2.009709 |
| H  | -0.476426 | 2.895699  | 1.643185  |
| H  | 1.255072  | 3.240286  | 1.448308  |
| H  | 0.103257  | 4.574778  | 1.648711  |
| H  | 0.676967  | 0.652090  | 1.036905  |
| H  | 4.919470  | -1.124825 | 0.775668  |
| H  | 4.393671  | 0.954680  | -2.234562 |
| H  | 2.287084  | 2.176755  | -2.646821 |
| H  | -0.388517 | -0.238031 | -1.856436 |
| H  | -2.389427 | -1.644296 | -1.583384 |
| H  | -5.410929 | -0.474959 | 0.200898  |

10-conf06

- Electronic Energy (Eh): -6779.41421857

- Cartesian Coordinates:

|    |           |           |           |
|----|-----------|-----------|-----------|
| Br | 2.790895  | -1.778893 | 1.629235  |
| C  | 2.718132  | -0.150061 | 0.656701  |
| C  | 1.527455  | 0.561681  | 0.647588  |
| C  | 1.406259  | 1.769210  | -0.051942 |
| C  | 0.087672  | 2.536996  | 0.028671  |
| C  | -0.030409 | 3.747010  | -0.938001 |
| C  | -1.200867 | 4.652113  | -0.550337 |
| C  | -0.123500 | 3.359451  | -2.414968 |
| C  | -1.114952 | 1.613151  | -0.069144 |
| C  | -2.182615 | 1.751492  | 0.818902  |
| C  | -3.311215 | 0.944883  | 0.713490  |
| Br | -4.720745 | 1.196023  | 1.959873  |
| C  | -3.413386 | -0.037259 | -0.285470 |
| N  | -4.568492 | -0.830059 | -0.355136 |
| C  | -4.850298 | -1.814553 | -1.245923 |
| C  | -6.234609 | -2.476106 | -1.019705 |
| F  | -6.884969 | -1.955256 | 0.032601  |
| F  | -6.082501 | -3.773891 | -0.804136 |
| F  | -6.993495 | -2.307291 | -2.092437 |
| O  | -4.165076 | -2.208701 | -2.156379 |
| C  | -2.336363 | -0.182622 | -1.171444 |
| C  | -1.214676 | 0.628518  | -1.057237 |
| C  | 2.536135  | 2.228644  | -0.730949 |
| C  | 3.735522  | 1.520720  | -0.730607 |
| C  | 3.851402  | 0.312440  | -0.036804 |
| N  | 5.032910  | -0.443040 | -0.006903 |
| C  | 6.217562  | -0.156450 | -0.602893 |
| C  | 7.312676  | -1.224535 | -0.349122 |
| F  | 6.867057  | -2.246855 | 0.397488  |
| F  | 8.338609  | -0.674259 | 0.283707  |
| F  | 7.737301  | -1.716221 | -1.503220 |
| O  | 6.494073  | 0.803700  | -1.278271 |
| H  | 0.672694  | 0.162079  | 1.196102  |
| H  | 0.065972  | 2.971309  | 1.043797  |
| H  | 0.887238  | 4.341705  | -0.794465 |
| H  | -1.211606 | 5.555651  | -1.177907 |
| H  | -2.166993 | 4.141733  | -0.688057 |
| H  | -1.134636 | 4.974826  | 0.500445  |
| H  | 0.674493  | 2.666939  | -2.720930 |
| H  | -1.088078 | 2.877709  | -2.636829 |
| H  | -0.049555 | 4.255990  | -3.048608 |
| H  | -2.140740 | 2.501845  | 1.610776  |
| H  | -5.274310 | -0.636331 | 0.349324  |
| H  | -2.395075 | -0.942902 | -1.946845 |
| H  | -0.387864 | 0.477713  | -1.754115 |
| H  | 2.507366  | 3.166497  | -1.285495 |
| H  | 4.599198  | 1.899269  | -1.272276 |
| H  | 4.986188  | -1.306244 | 0.526893  |

-----  
10-conf07

- Electronic Energy (Eh): -6779.414035800001

- Cartesian Coordinates:

|    |           |           |           |
|----|-----------|-----------|-----------|
| Br | 5.107220  | 1.728347  | -1.280116 |
| C  | 3.598574  | 1.063185  | -0.337573 |
| C  | 2.440002  | 1.835543  | -0.321151 |
| C  | 1.294169  | 1.399260  | 0.345502  |
| C  | 0.013376  | 2.225600  | 0.443648  |
| C  | -0.023592 | 3.503119  | -0.438783 |
| C  | -1.148735 | 4.443565  | -0.003684 |
| C  | -0.117081 | 3.223515  | -1.940286 |
| C  | -1.225704 | 1.366788  | 0.250555  |
| C  | -2.317947 | 1.503873  | 1.108364  |
| C  | -3.478304 | 0.761446  | 0.914224  |
| Br | -4.920326 | 1.005837  | 2.124275  |
| C  | -3.589173 | -0.152440 | -0.146710 |

|   |           |           |           |
|---|-----------|-----------|-----------|
| N | -4.777435 | -0.880795 | -0.305311 |
| C | -5.074979 | -1.789144 | -1.268867 |
| C | -6.497161 | -2.392324 | -1.132559 |
| F | -6.417254 | -3.707563 | -1.000821 |
| F | -7.208098 | -2.113800 | -2.215348 |
| F | -7.158129 | -1.909171 | -0.068923 |
| O | -4.377939 | -2.156793 | -2.181429 |
| C | -2.487501 | -0.297588 | -1.001836 |
| C | -1.333946 | 0.448883  | -0.798696 |
| C | 1.366776  | 0.164252  | 1.002393  |
| C | 2.517628  | -0.610935 | 0.996646  |
| C | 3.664595  | -0.175360 | 0.317727  |
| N | 4.852527  | -0.919752 | 0.271445  |
| C | 5.102926  | -2.123761 | 0.845307  |
| C | 6.538214  | -2.648026 | 0.580892  |
| F | 7.257947  | -1.807549 | -0.178963 |
| F | 6.482875  | -3.815513 | -0.041997 |
| F | 7.177262  | -2.807145 | 1.730442  |
| O | 4.356878  | -2.797188 | 1.511485  |
| H | 2.457796  | 2.791021  | -0.843746 |
| H | -0.017244 | 2.588601  | 1.486026  |
| H | 0.922349  | 4.036191  | -0.243985 |
| H | -1.102086 | 5.385897  | -0.569535 |
| H | -2.138830 | 3.997030  | -0.185601 |
| H | -1.079901 | 4.691692  | 1.066956  |
| H | 0.643400  | 2.508278  | -2.286834 |
| H | -1.103970 | 2.813788  | -2.204281 |
| H | 0.016356  | 4.155615  | -2.509611 |
| H | -2.270528 | 2.201985  | 1.946339  |
| H | -5.497596 | -0.697507 | 0.387444  |
| H | -2.552692 | -1.006115 | -1.824318 |
| H | -0.489448 | 0.299693  | -1.474411 |
| H | 0.491681  | -0.211551 | 1.537145  |
| H | 2.546374  | -1.565900 | 1.516251  |
| H | 5.611660  | -0.499525 | -0.256999 |

-----  
10-conf08

- Electronic Energy (Eh): -6779.41457856

- Cartesian Coordinates:

|    |           |           |           |
|----|-----------|-----------|-----------|
| Br | -2.650353 | -0.820748 | 2.279001  |
| C  | -2.518767 | 0.237506  | 0.708544  |
| C  | -1.367721 | 0.988208  | 0.512947  |
| C  | -1.216598 | 1.785762  | -0.625886 |
| C  | 0.019825  | 2.646963  | -0.822714 |
| C  | -0.092482 | 4.004405  | -0.076593 |
| C  | -0.261034 | 3.872772  | 1.438440  |
| C  | -1.211482 | 4.866552  | -0.663035 |
| C  | 1.306777  | 1.866728  | -0.558970 |
| C  | 1.416912  | 0.562298  | -1.058146 |
| C  | 2.579026  | -0.176842 | -0.893300 |
| Br | 2.639201  | -1.938268 | -1.598932 |
| C  | 3.693410  | 0.353974  | -0.218084 |
| N  | 4.845598  | -0.431763 | -0.067808 |
| C  | 6.004989  | -0.096295 | 0.551790  |
| C  | 7.069549  | -1.223421 | 0.525496  |
| F  | 7.389999  | -1.567633 | 1.763930  |
| F  | 8.159808  | -0.797507 | -0.094780 |
| F  | 6.635163  | -2.322850 | -0.109937 |
| O  | 6.279643  | 0.943726  | 1.097124  |
| C  | 3.589215  | 1.658061  | 0.274773  |
| C  | 2.418473  | 2.392563  | 0.101414  |
| C  | -2.254776 | 1.789098  | -1.558139 |
| C  | -3.413015 | 1.040176  | -1.372677 |
| C  | -3.568511 | 0.248896  | -0.228747 |
| N  | -4.711644 | -0.527548 | 0.012142  |
| C  | -5.817449 | -0.643060 | -0.765759 |
| C  | -6.894639 | -1.588559 | -0.173918 |
| F  | -6.507733 | -2.142433 | 0.985709  |
| F  | -7.152971 | -2.566970 | -1.027985 |

|   |           |           |           |
|---|-----------|-----------|-----------|
| F | -8.011295 | -0.911258 | 0.050191  |
| O | -6.039622 | -0.105382 | -1.822072 |
| H | -0.569781 | 0.938580  | 1.255482  |
| H | 0.048778  | 2.904162  | -1.896156 |
| H | 0.852049  | 4.538793  | -0.273232 |
| H | -0.178645 | 4.860083  | 1.917110  |
| H | -1.251922 | 3.465830  | 1.692140  |
| H | 0.496425  | 3.217159  | 1.892935  |
| H | -1.088564 | 5.008644  | -1.748000 |
| H | -2.200481 | 4.413885  | -0.490612 |
| H | -1.215924 | 5.861380  | -0.193252 |
| H | 0.575641  | 0.108218  | -1.584890 |
| H | 4.796065  | -1.361833 | -0.473772 |
| H | 4.438615  | 2.090479  | 0.798416  |
| H | 2.397723  | 3.405649  | 0.502925  |
| H | -2.163429 | 2.394255  | -2.463222 |
| H | -4.209693 | 1.055926  | -2.112709 |
| H | -4.701317 | -1.064047 | 0.874922  |

-----  
10-conf09

- Electronic Energy (Eh): -6779.4142184

- Cartesian Coordinates:

|    |           |           |           |
|----|-----------|-----------|-----------|
| Br | 2.790828  | -1.778483 | 1.629922  |
| C  | 2.718017  | -0.149879 | 0.657004  |
| C  | 1.527408  | 0.561915  | 0.647877  |
| C  | 1.406193  | 1.769325  | -0.051921 |
| C  | 0.087643  | 2.537126  | 0.028679  |
| C  | -0.030302 | 3.747191  | -0.937970 |
| C  | -1.200592 | 4.652463  | -0.550264 |
| C  | -0.123497 | 3.359578  | -2.414915 |
| C  | -1.115007 | 1.613354  | -0.069264 |
| C  | -2.182873 | 1.751916  | 0.818497  |
| C  | -3.311482 | 0.945322  | 0.712961  |
| Br | -4.721302 | 1.196760  | 1.958952  |
| C  | -3.413455 | -0.037005 | -0.285822 |
| N  | -4.568529 | -0.829812 | -0.355593 |
| C  | -4.850008 | -1.814680 | -1.246086 |
| C  | -6.233751 | -2.477152 | -1.019243 |
| F  | -6.991067 | -2.314462 | -2.093906 |
| F  | -6.886575 | -1.952543 | 0.029665  |
| F  | -6.079992 | -3.773781 | -0.797433 |
| O  | -4.164555 | -2.208971 | -2.156318 |
| C  | -2.336229 | -0.182557 | -1.171528 |
| C  | -1.214542 | 0.628555  | -1.057219 |
| C  | 2.535979  | 2.228531  | -0.731165 |
| C  | 3.735340  | 1.520495  | -0.730834 |
| C  | 3.851248  | 0.312388  | -0.036800 |
| N  | 5.032636  | -0.443244 | -0.007020 |
| C  | 6.217463  | -0.156416 | -0.602568 |
| C  | 7.312382  | -1.224782 | -0.349281 |
| F  | 7.735103  | -1.717806 | -1.503537 |
| F  | 6.867230  | -2.246161 | 0.398901  |
| F  | 8.339479  | -0.674464 | 0.281552  |
| O  | 6.494085  | 0.803985  | -1.277558 |
| H  | 0.672676  | 0.162544  | 1.196603  |
| H  | 0.065917  | 2.971408  | 1.043821  |
| H  | 0.887445  | 4.341735  | -0.794457 |
| H  | -1.211259 | 5.555970  | -1.177885 |
| H  | -2.166816 | 4.142239  | -0.687866 |
| H  | -1.134203 | 4.975233  | 0.500489  |
| H  | 0.674359  | 2.666898  | -2.720844 |
| H  | -1.088168 | 2.877992  | -2.636703 |
| H  | -0.049405 | 4.256045  | -3.048638 |
| H  | -2.141168 | 2.502408  | 1.610243  |
| H  | -5.274777 | -0.635586 | 0.348299  |
| H  | -2.394768 | -0.942973 | -1.946809 |
| H  | -0.387589 | 0.477630  | -1.753904 |
| H  | 2.507254  | 3.166258  | -1.285936 |
| H  | 4.598930  | 1.898942  | -1.272710 |



H 4.985962 -1.306320 0.526989  
-----

10-conf10

- Electronic Energy (Eh): -6779.41439409

- Cartesian Coordinates:

|    |           |           |           |
|----|-----------|-----------|-----------|
| Br | -4.944789 | 1.869539  | 0.937321  |
| C  | -3.454844 | 1.147091  | 0.007324  |
| C  | -2.326624 | 1.947894  | -0.150766 |
| C  | -1.195065 | 1.473273  | -0.815680 |
| C  | 0.051918  | 2.320117  | -1.062315 |
| C  | 0.080541  | 3.690376  | -0.331775 |
| C  | 1.155420  | 4.607068  | -0.918130 |
| C  | 0.243442  | 3.586514  | 1.186348  |
| C  | 1.326755  | 1.526107  | -0.829965 |
| C  | 1.490695  | 0.742140  | 0.316237  |
| C  | 2.675714  | 0.056761  | 0.546134  |
| Br | 2.823697  | -0.986454 | 2.125161  |
| C  | 3.747717  | 0.122248  | -0.363233 |
| N  | 4.924594  | -0.589906 | -0.088580 |
| C  | 6.057137  | -0.643482 | -0.834020 |
| C  | 7.164542  | -1.534869 | -0.214653 |
| F  | 8.249641  | -0.809697 | 0.012629  |
| F  | 7.473183  | -2.514436 | -1.051049 |
| F  | 6.785668  | -2.087601 | 0.948167  |
| O  | 6.280462  | -0.091875 | -1.882907 |
| C  | 3.579536  | 0.899396  | -1.515078 |
| C  | 2.387407  | 1.582908  | -1.734820 |
| C  | -1.251647 | 0.169331  | -1.324684 |
| C  | -2.372452 | -0.635299 | -1.177003 |
| C  | -3.504001 | -0.160305 | -0.498609 |
| N  | -4.661092 | -0.930806 | -0.311645 |
| C  | -4.889581 | -2.202877 | -0.725485 |
| C  | -6.292391 | -2.737502 | -0.336758 |
| F  | -6.167709 | -3.816863 | 0.420783  |
| F  | -6.969293 | -3.058501 | -1.429280 |
| F  | -7.013506 | -1.834298 | 0.345872  |
| O  | -4.146102 | -2.927887 | -1.338267 |
| H  | -2.356763 | 2.956261  | 0.259852  |
| H  | 0.030969  | 2.561747  | -2.139453 |
| H  | -0.889900 | 4.170216  | -0.543706 |
| H  | 1.101492  | 5.605262  | -0.458682 |
| H  | 2.165938  | 4.210596  | -0.732833 |
| H  | 1.034233  | 4.731176  | -2.005453 |
| H  | -0.478251 | 2.894402  | 1.645032  |
| H  | 1.253545  | 3.238518  | 1.451570  |
| H  | 0.102076  | 4.573254  | 1.652224  |
| H  | 0.677182  | 0.651744  | 1.037738  |
| H  | 4.919650  | -1.125113 | 0.775088  |
| H  | 4.393564  | 0.956033  | -2.233940 |
| H  | 2.286915  | 2.178281  | -2.645391 |
| H  | -0.387621 | -0.238029 | -1.854344 |
| H  | -2.388760 | -1.644135 | -1.582915 |
| H  | -5.412598 | -0.473878 | 0.196793  |

-----  
10-conf11

- Electronic Energy (Eh): -6779.4140357

- Cartesian Coordinates:

|    |           |           |           |
|----|-----------|-----------|-----------|
| Br | 5.107400  | -1.728445 | 1.279635  |
| C  | 3.598595  | -1.063213 | 0.337415  |
| C  | 2.440083  | -1.835688 | 0.320946  |
| C  | 1.294130  | -1.399349 | -0.345450 |
| C  | 0.013384  | -2.225788 | -0.443583 |
| C  | -0.023415 | -3.503378 | 0.438751  |
| C  | -1.148633 | -4.443792 | 0.003780  |
| C  | -0.116621 | -3.223860 | 1.940284  |
| C  | -1.225739 | -1.367087 | -0.250385 |
| C  | -2.317874 | -1.503940 | -1.108366 |
| C  | -3.478225 | -0.761506 | -0.914213 |
| Br | -4.920111 | -1.005594 | -2.124480 |
| C  | -3.589190 | 0.152161  | 0.146892  |

|   |           |           |           |
|---|-----------|-----------|-----------|
| N | -4.777381 | 0.880634  | 0.305401  |
| C | -5.075088 | 1.788590  | 1.269267  |
| C | -6.496929 | 2.392429  | 1.132510  |
| F | -6.416188 | 3.707449  | 0.998775  |
| F | -7.207739 | 2.116000  | 2.215872  |
| F | -7.158483 | 1.908157  | 0.069746  |
| O | -4.378288 | 2.155661  | 2.182253  |
| C | -2.487653 | 0.297033  | 1.002235  |
| C | -1.334107 | -0.449454 | 0.799096  |
| C | 1.366567  | -0.164199 | -1.002111 |
| C | 2.517343  | 0.611089  | -0.996303 |
| C | 3.664418  | 0.175479  | -0.317584 |
| N | 4.852246  | 0.920012  | -0.271220 |
| C | 5.102488  | 2.124102  | -0.844964 |
| C | 6.537807  | 2.648371  | -0.580814 |
| F | 6.482585  | 3.816146  | 0.041516  |
| F | 7.176861  | 2.806881  | -1.730457 |
| F | 7.257482  | 1.808179  | 0.179411  |
| O | 4.356251  | 2.797612  | -1.510856 |
| H | 2.458086  | -2.791310 | 0.843264  |
| H | -0.017256 | -2.588713 | -1.485990 |
| H | 0.922496  | -4.036419 | 0.243746  |
| H | -1.101886 | -5.386176 | 0.569539  |
| H | -2.138689 | -3.997260 | 0.185911  |
| H | -1.079994 | -4.691828 | -1.066894 |
| H | 0.643856  | -2.508534 | 2.286672  |
| H | -1.103507 | -2.814289 | 2.204534  |
| H | 0.017080  | -4.155966 | 2.509538  |
| H | -2.270383 | -2.201892 | -1.946471 |
| H | -5.497533 | 0.697379  | -0.387378 |
| H | -2.552942 | 1.005353  | 1.824890  |
| H | -0.489730 | -0.300513 | 1.475018  |
| H | 0.491394  | 0.211624  | -1.536720 |
| H | 2.545956  | 1.566171  | -1.515708 |
| H | 5.611506  | 0.499729  | 0.257002  |

-----  
10-conf12

- Electronic Energy (Eh): -6779.41626772

- Cartesian Coordinates:

|    |           |           |           |
|----|-----------|-----------|-----------|
| Br | -2.875940 | -0.486231 | 2.290984  |
| C  | -2.641882 | 0.273426  | 0.566944  |
| C  | -1.506937 | 1.036691  | 0.329777  |
| C  | -1.284840 | 1.619142  | -0.920850 |
| C  | -0.054261 | 2.477185  | -1.175389 |
| C  | -0.097626 | 3.816861  | -0.400830 |
| C  | -1.402906 | 4.566760  | -0.669844 |
| C  | 1.105949  | 4.694308  | -0.748050 |
| C  | 1.205309  | 1.653693  | -0.951779 |
| C  | 1.845651  | 1.585699  | 0.287668  |
| C  | 2.958423  | 0.772827  | 0.472285  |
| Br | 3.773406  | 0.737869  | 2.186765  |
| C  | 3.478792  | -0.005260 | -0.575528 |
| N  | 4.603763  | -0.810130 | -0.342182 |
| C  | 5.245796  | -1.618246 | -1.223248 |
| C  | 6.456844  | -2.365967 | -0.607547 |
| F  | 7.560535  | -2.057809 | -1.271657 |
| F  | 6.263249  | -3.674245 | -0.684519 |
| F  | 6.649463  | -2.052017 | 0.683227  |
| O  | 4.980973  | -1.807201 | -2.384353 |
| C  | 2.838674  | 0.066602  | -1.819825 |
| C  | 1.726662  | 0.881625  | -1.992478 |
| C  | -2.234512 | 1.401696  | -1.918698 |
| C  | -3.374518 | 0.636092  | -1.692977 |
| C  | -3.601063 | 0.055780  | -0.439694 |
| N  | -4.730510 | -0.725976 | -0.154137 |
| C  | -5.759840 | -1.033648 | -0.982851 |
| C  | -6.845001 | -1.920854 | -0.319611 |
| F  | -6.980870 | -3.049145 | -0.999447 |
| F  | -8.005963 | -1.282160 | -0.315857 |

|   |           |           |           |
|---|-----------|-----------|-----------|
| F | -6.543106 | -2.236163 | 0.949581  |
| O | -5.911692 | -0.699169 | -2.131536 |
| H | -0.784295 | 1.167655  | 1.136952  |
| H | -0.071385 | 2.739778  | -2.246666 |
| H | -0.066127 | 3.590808  | 0.680502  |
| H | -1.412967 | 5.527537  | -0.134243 |
| H | -1.514906 | 4.783296  | -1.745354 |
| H | -2.283805 | 3.992371  | -0.349980 |
| H | 2.062359  | 4.199823  | -0.527237 |
| H | 1.100815  | 4.947845  | -1.820876 |
| H | 1.075113  | 5.637706  | -0.182896 |
| H | 1.490564  | 2.178283  | 1.132017  |
| H | 4.976496  | -0.777216 | 0.602259  |
| H | 3.228111  | -0.525439 | -2.644830 |
| H | 1.247443  | 0.910575  | -2.974155 |
| H | -2.089405 | 1.844860  | -2.906824 |
| H | -4.104212 | 0.478242  | -2.483815 |
| H | -4.774190 | -1.102357 | 0.788454  |

-----  
10-conf13

- Electronic Energy (Eh): -6779.41611035

- Cartesian Coordinates:

|    |           |           |           |
|----|-----------|-----------|-----------|
| Br | -4.005752 | 0.111442  | 2.485039  |
| C  | -3.107693 | 0.552063  | 0.871386  |
| C  | -1.971895 | 1.350281  | 0.945687  |
| C  | -1.271965 | 1.709856  | -0.208266 |
| C  | 0.009486  | 2.528703  | -0.162827 |
| C  | 0.029618  | 3.640328  | 0.914226  |
| C  | -1.142928 | 4.605329  | 0.733021  |
| C  | 1.356986  | 4.399484  | 0.895403  |
| C  | 1.211122  | 1.600855  | -0.061210 |
| C  | 2.186820  | 1.596887  | -1.057634 |
| C  | 3.299572  | 0.766538  | -0.964587 |
| Br | 4.584728  | 0.818374  | -2.360442 |
| C  | 3.477594  | -0.092558 | 0.131957  |
| N  | 4.613737  | -0.914001 | 0.185846  |
| C  | 4.960952  | -1.791593 | 1.160785  |
| C  | 6.292166  | -2.535284 | 0.878766  |
| F  | 7.151877  | -2.305222 | 1.859631  |
| F  | 6.862967  | -2.145099 | -0.271660 |
| F  | 6.070445  | -3.839196 | 0.802395  |
| O  | 4.365011  | -2.043130 | 2.178555  |
| C  | 2.494143  | -0.088545 | 1.131730  |
| C  | 1.386272  | 0.742148  | 1.027223  |
| C  | -1.756971 | 1.241974  | -1.431506 |
| C  | -2.891148 | 0.443738  | -1.517932 |
| C  | -3.591770 | 0.080049  | -0.360532 |
| N  | -4.742346 | -0.722136 | -0.386104 |
| C  | -5.356511 | -1.261755 | -1.469127 |
| C  | -6.612617 | -2.099187 | -1.114682 |
| F  | -6.853329 | -2.126838 | 0.205480  |
| F  | -6.451269 | -3.347724 | -1.526334 |
| F  | -7.677657 | -1.586607 | -1.712908 |
| O  | -5.039117 | -1.160764 | -2.628121 |
| H  | -1.645639 | 1.698780  | 1.926535  |
| H  | 0.086303  | 3.042643  | -1.135965 |
| H  | -0.060750 | 3.161641  | 1.905974  |
| H  | -1.127728 | 5.385200  | 1.508846  |
| H  | -1.080738 | 5.107754  | -0.246308 |
| H  | -2.115744 | 4.096521  | 0.785326  |
| H  | 2.212038  | 3.742844  | 1.109842  |
| H  | 1.527632  | 4.864338  | -0.090060 |
| H  | 1.352207  | 5.203648  | 1.645969  |
| H  | 2.087998  | 2.254680  | -1.923383 |
| H  | 5.248815  | -0.833363 | -0.602949 |
| H  | 2.614429  | -0.749705 | 1.986803  |
| H  | 0.637361  | 0.707847  | 1.821258  |
| H  | -1.231339 | 1.503992  | -2.353079 |
| H  | -3.251486 | 0.091546  | -2.481671 |

|   |           |           |          |
|---|-----------|-----------|----------|
| H | -5.159112 | -0.917515 | 0.519546 |
|---|-----------|-----------|----------|

-----  
10-conf14

- Electronic Energy (Eh): -6779.41604863

- Cartesian Coordinates:

|    |           |           |           |
|----|-----------|-----------|-----------|
| Br | 3.639806  | 0.558553  | 2.545312  |
| C  | 2.970664  | 0.694707  | 0.774363  |
| C  | 1.830858  | 1.457721  | 0.553611  |
| C  | 1.292822  | 1.596295  | -0.727900 |
| C  | 0.007553  | 2.390701  | -0.909007 |
| C  | -0.075997 | 3.186632  | -2.233974 |
| C  | 1.100412  | 4.154236  | -2.370087 |
| C  | -1.403761 | 3.937728  | -2.340849 |
| C  | -1.194362 | 1.481281  | -0.701150 |
| C  | -2.115653 | 1.748705  | 0.311106  |
| C  | -3.228853 | 0.934712  | 0.497069  |
| Br | -4.437910 | 1.363751  | 1.896141  |
| C  | -3.462045 | -0.179232 | -0.325578 |
| N  | -4.597324 | -0.973211 | -0.103873 |
| C  | -4.992693 | -2.072296 | -0.794642 |
| C  | -6.307842 | -2.698090 | -0.261979 |
| F  | -6.815493 | -2.016278 | 0.776834  |
| F  | -6.084480 | -3.941603 | 0.136430  |
| F  | -7.218817 | -2.714887 | -1.223307 |
| O  | -4.449119 | -2.590160 | -1.738272 |
| C  | -2.532855 | -0.447778 | -1.341161 |
| C  | -1.423695 | 0.369315  | -1.515912 |
| C  | 1.943606  | 0.942957  | -1.777110 |
| C  | 3.085328  | 0.177020  | -1.568033 |
| C  | 3.622910  | 0.036239  | -0.282661 |
| N  | 4.772361  | -0.722299 | -0.015749 |
| C  | 5.537320  | -1.412242 | -0.898885 |
| C  | 6.744388  | -2.131019 | -0.242399 |
| F  | 7.875485  | -1.660028 | -0.747127 |
| F  | 6.678814  | -3.431554 | -0.482388 |
| F  | 6.781778  | -1.956795 | 1.087916  |
| O  | 5.383206  | -1.515203 | -2.090504 |
| H  | 1.350897  | 1.949681  | 1.402153  |
| H  | -0.017962 | 3.140065  | -0.099647 |
| H  | -0.036204 | 2.466930  | -3.071083 |
| H  | 1.041258  | 4.706834  | -3.319546 |
| H  | 1.087879  | 4.893805  | -1.552511 |
| H  | 2.070779  | 3.639091  | -2.339503 |
| H  | -2.266377 | 3.256449  | -2.333612 |
| H  | -1.523537 | 4.642341  | -1.500819 |
| H  | -1.442559 | 4.521543  | -3.272357 |
| H  | -1.973597 | 2.609406  | 0.967671  |
| H  | -5.190897 | -0.680597 | 0.666758  |
| H  | -2.696098 | -1.308530 | -1.985552 |
| H  | -0.717017 | 0.120758  | -2.310475 |
| H  | 1.566885  | 1.031689  | -2.797863 |
| H  | 3.578820  | -0.321013 | -2.399423 |
| H  | 5.059151  | -0.752851 | 0.958367  |

-----  
10-conf15

- Electronic Energy (Eh): -6779.41611023

- Cartesian Coordinates:

|    |           |          |           |
|----|-----------|----------|-----------|
| Br | 4.584783  | 0.818495 | 2.360392  |
| C  | 3.299588  | 0.766549 | 0.964578  |
| C  | 2.186836  | 1.596899 | 1.057595  |
| C  | 1.211091  | 1.600764 | 0.061217  |
| C  | 0.009486  | 2.528659 | 0.162775  |
| C  | 0.029674  | 3.640206 | -0.914369 |
| C  | 1.357077  | 4.399300 | -0.895634 |
| C  | -1.142818 | 4.605280 | -0.733224 |
| C  | -1.272002 | 1.709883 | 0.208234  |
| C  | -1.971893 | 1.350234 | -0.945720 |
| C  | -3.107730 | 0.552074 | -0.871396 |

|    |           |           |           |
|----|-----------|-----------|-----------|
| Br | -4.005739 | 0.111352  | -2.485049 |
| C  | -3.591889 | 0.080195  | 0.360541  |
| N  | -4.742490 | -0.721953 | 0.386123  |
| C  | -5.356710 | -1.261470 | 1.469166  |
| C  | -6.612610 | -2.099209 | 1.114721  |
| F  | -6.853645 | -2.126437 | -0.205391 |
| F  | -7.677683 | -1.587325 | 1.713425  |
| F  | -6.450645 | -3.347871 | 1.525826  |
| O  | -5.039470 | -1.160219 | 2.628185  |
| C  | -2.891316 | 0.443976  | 1.517942  |
| C  | -1.757093 | 1.242144  | 1.431495  |
| C  | 1.386185  | 0.741941  | -1.027133 |
| C  | 2.494057  | -0.088755 | -1.131612 |
| C  | 3.477562  | -0.092657 | -0.131892 |
| N  | 4.613699  | -0.914103 | -0.185756 |
| C  | 4.961006  | -1.791611 | -1.160746 |
| C  | 6.292217  | -2.535292 | -0.878679 |
| F  | 7.151968  | -2.305236 | -1.859505 |
| F  | 6.070497  | -3.839207 | -0.802303 |
| F  | 6.862958  | -2.145104 | 0.271773  |
| O  | 4.365145  | -2.043058 | -2.178588 |
| H  | 2.088047  | 2.254775  | 1.923285  |
| H  | 0.086312  | 3.042664  | 1.135877  |
| H  | -0.060735 | 3.161429  | -1.906070 |
| H  | 1.352301  | 5.203441  | -1.646225 |
| H  | 1.527793  | 4.864183  | 0.089805  |
| H  | 2.212091  | 3.742620  | -1.110094 |
| H  | -2.115664 | 4.096525  | -0.785482 |
| H  | -1.080590 | 5.107774  | 0.246067  |
| H  | -1.127582 | 5.385095  | -1.509105 |
| H  | -1.645568 | 1.698631  | -1.926582 |
| H  | -5.159197 | -0.917440 | -0.519531 |
| H  | -3.251729 | 0.091909  | 2.481698  |
| H  | -1.231498 | 1.504232  | 2.353069  |
| H  | 0.637225  | 0.707544  | -1.821117 |
| H  | 2.614306  | -0.750001 | -1.986623 |
| H  | 5.248723  | -0.833512 | 0.603088  |

-----  
10-conf16

- Electronic Energy (Eh): -6779.41626839

- Cartesian Coordinates:

|    |           |           |           |
|----|-----------|-----------|-----------|
| Br | -2.875920 | -0.486040 | 2.291038  |
| C  | -2.641864 | 0.273606  | 0.566991  |
| C  | -1.506945 | 1.036901  | 0.329831  |
| C  | -1.284848 | 1.619353  | -0.920800 |
| C  | -0.054251 | 2.477371  | -1.175373 |
| C  | -0.097514 | 3.817039  | -0.400797 |
| C  | -1.402773 | 4.566983  | -0.669806 |
| C  | 1.106100  | 4.694420  | -0.748022 |
| C  | 1.205295  | 1.653812  | -0.951845 |
| C  | 1.845592  | 1.585749  | 0.287628  |
| C  | 2.958361  | 0.772875  | 0.472238  |
| Br | 3.773312  | 0.737804  | 2.186719  |
| C  | 3.478762  | -0.005111 | -0.575633 |
| N  | 4.603766  | -0.809964 | -0.342283 |
| C  | 5.245675  | -1.618235 | -1.223272 |
| C  | 6.456473  | -2.366294 | -0.607466 |
| F  | 6.262513  | -3.674498 | -0.684361 |
| F  | 6.649174  | -2.052316 | 0.683298  |
| F  | 7.560314  | -2.058515 | -1.271544 |
| O  | 4.980933  | -1.807090 | -2.384418 |
| C  | 2.838741  | 0.066868  | -1.819971 |
| C  | 1.726715  | 0.881885  | -1.992604 |
| C  | -2.234528 | 1.401909  | -1.918634 |
| C  | -3.374535 | 0.636294  | -1.692912 |
| C  | -3.601053 | 0.055947  | -0.439647 |
| N  | -4.730469 | -0.725847 | -0.154082 |
| C  | -5.759772 | -1.033598 | -0.982804 |
| C  | -6.844692 | -1.921182 | -0.319669 |

|   |           |           |           |
|---|-----------|-----------|-----------|
| F | -6.979729 | -3.049742 | -0.999255 |
| F | -8.005980 | -1.283115 | -0.316466 |
| F | -6.543017 | -2.235984 | 0.949707  |
| O | -5.911617 | -0.699168 | -2.131504 |
| H | -0.784325 | 1.167886  | 1.137018  |
| H | -0.071428 | 2.739989  | -2.246641 |
| H | -0.066015 | 3.590996  | 0.680534  |
| H | -1.412829 | 5.527758  | -0.134204 |
| H | -1.514759 | 4.783533  | -1.745314 |
| H | -2.283683 | 3.992606  | -0.349954 |
| H | 2.062474  | 4.199905  | -0.527123 |
| H | 1.101037  | 4.947888  | -1.820864 |
| H | 1.075269  | 5.637856  | -0.182936 |
| H | 1.490469  | 2.178300  | 1.131984  |
| H | 4.976401  | -0.777138 | 0.602196  |
| H | 3.228282  | -0.525059 | -2.645002 |
| H | 1.247558  | 0.910967  | -2.974305 |
| H | -2.089454 | 1.845097  | -2.906753 |
| H | -4.104233 | 0.478467  | -2.483749 |
| H | -4.774219 | -1.102082 | 0.788563  |

-----  
10-conf17

- Electronic Energy (Eh): -6779.41604871

- Cartesian Coordinates:

|    |           |           |           |
|----|-----------|-----------|-----------|
| Br | 3.640001  | 0.558970  | 2.545179  |
| C  | 2.970703  | 0.694765  | 0.774261  |
| C  | 1.830927  | 1.457815  | 0.553441  |
| C  | 1.292785  | 1.596138  | -0.728046 |
| C  | 0.007562  | 2.390602  | -0.909243 |
| C  | -0.075911 | 3.186481  | -2.234247 |
| C  | 1.100588  | 4.153964  | -2.370408 |
| C  | -1.403609 | 3.937690  | -2.341131 |
| C  | -1.194391 | 1.481238  | -0.701345 |
| C  | -2.115527 | 1.748614  | 0.311069  |
| C  | -3.228739 | 0.934661  | 0.497126  |
| Br | -4.437578 | 1.363649  | 1.896397  |
| C  | -3.462104 | -0.179198 | -0.325582 |
| N  | -4.597383 | -0.973148 | -0.103766 |
| C  | -4.992952 | -2.072112 | -0.794619 |
| C  | -6.308064 | -2.697876 | -0.261826 |
| F  | -6.815351 | -2.016326 | 0.777347  |
| F  | -6.084790 | -3.941556 | 0.136104  |
| F  | -7.219282 | -2.714206 | -1.222924 |
| O  | -4.449596 | -2.589882 | -1.738422 |
| C  | -2.533078 | -0.447697 | -1.341324 |
| C  | -1.423901 | 0.369361  | -1.516173 |
| C  | 1.943433  | 0.942520  | -1.777174 |
| C  | 3.085104  | 0.176536  | -1.568028 |
| C  | 3.622797  | 0.036006  | -0.282668 |
| N  | 4.772210  | -0.722563 | -0.015697 |
| C  | 5.537167  | -1.412569 | -0.898787 |
| C  | 6.744341  | -2.131142 | -0.242276 |
| F  | 6.781528  | -1.957103 | 1.088071  |
| F  | 7.875370  | -1.659750 | -0.746809 |
| F  | 6.679141  | -3.431645 | -0.482482 |
| O  | 5.383017  | -1.515672 | -2.090387 |
| H  | 1.351089  | 1.950006  | 1.401919  |
| H  | -0.017941 | 3.140010  | -0.099924 |
| H  | -0.036186 | 2.466753  | -3.071336 |
| H  | 1.041480  | 4.706535  | -3.319886 |
| H  | 1.088141  | 4.893565  | -1.552858 |
| H  | 2.070903  | 3.638720  | -2.339816 |
| H  | -2.266279 | 3.256478  | -2.333871 |
| H  | -1.523316 | 4.642325  | -1.501110 |
| H  | -1.442374 | 4.521495  | -3.272648 |
| H  | -1.973331 | 2.609256  | 0.967682  |
| H  | -5.190777 | -0.680633 | 0.667038  |
| H  | -2.696444 | -1.308379 | -1.985777 |
| H  | -0.717379 | 0.120847  | -2.310888 |

|   |          |           |           |
|---|----------|-----------|-----------|
| H | 1.566630 | 1.031063  | -2.797913 |
| H | 3.578494 | -0.321717 | -2.399347 |
| H | 5.058990 | -0.753071 | 0.958424  |

-----  
10-conf18

- Electronic Energy (Eh): -6779.416110509999

- Cartesian Coordinates:

|    |           |           |           |
|----|-----------|-----------|-----------|
| Br | -4.005340 | 0.111171  | 2.485109  |
| C  | -3.107516 | 0.552096  | 0.871408  |
| C  | -1.971722 | 1.350321  | 0.945685  |
| C  | -1.271948 | 1.710091  | -0.208303 |
| C  | 0.009485  | 2.528962  | -0.162854 |
| C  | 0.029542  | 3.640596  | 0.914186  |
| C  | -1.143077 | 4.605508  | 0.732996  |
| C  | 1.356860  | 4.399837  | 0.895317  |
| C  | 1.211120  | 1.601123  | -0.061177 |
| C  | 2.186647  | 1.596854  | -1.057762 |
| C  | 3.299368  | 0.766457  | -0.964703 |
| Br | 4.584279  | 0.817873  | -2.360802 |
| C  | 3.477522  | -0.092375 | 0.132020  |
| N  | 4.613618  | -0.913886 | 0.185925  |
| C  | 4.960890  | -1.791341 | 1.160969  |
| C  | 6.291956  | -2.535253 | 0.878829  |
| F  | 6.862590  | -2.145305 | -0.271756 |
| F  | 6.070037  | -3.839143 | 0.802694  |
| F  | 7.151872  | -2.305154 | 1.859518  |
| O  | 4.365096  | -2.042598 | 2.178895  |
| C  | 2.494257  | -0.088034 | 1.131982  |
| C  | 1.386428  | 0.742705  | 1.027463  |
| C  | -1.757110 | 1.242408  | -1.431556 |
| C  | -2.891289 | 0.444175  | -1.517961 |
| C  | -3.591742 | 0.080270  | -0.360523 |
| N  | -4.742299 | -0.721942 | -0.386076 |
| C  | -5.356424 | -1.261637 | -1.469086 |
| C  | -6.612293 | -2.099410 | -1.114587 |
| F  | -6.450333 | -3.348061 | -1.525699 |
| F  | -7.677395 | -1.587525 | -1.713268 |
| F  | -6.853292 | -2.126635 | 0.205531  |
| O  | -5.039142 | -1.160502 | -2.628098 |
| H  | -1.645346 | 1.698670  | 1.926547  |
| H  | 0.086333  | 3.042883  | -1.135999 |
| H  | -0.060784 | 3.161911  | 1.905940  |
| H  | -1.127877 | 5.385416  | 1.508783  |
| H  | -1.080980 | 5.107889  | -0.246361 |
| H  | -2.115853 | 4.096635  | 0.785386  |
| H  | 2.211963  | 3.743239  | 1.109678  |
| H  | 1.527413  | 4.864731  | -0.090143 |
| H  | 1.352085  | 5.203977  | 1.645908  |
| H  | 2.087717  | 2.254437  | -1.923658 |
| H  | 5.248564  | -0.833466 | -0.603000 |
| H  | 2.614675  | -0.748972 | 1.987207  |
| H  | 0.637670  | 0.708668  | 1.821653  |
| H  | -1.231606 | 1.504590  | -2.353155 |
| H  | -3.251763 | 0.092139  | -2.481706 |
| H  | -5.158999 | -0.917397 | 0.519586  |

-----  
10-conf19

- Electronic Energy (Eh): -6779.41611063

- Cartesian Coordinates:

|    |           |          |           |
|----|-----------|----------|-----------|
| Br | 4.585259  | 0.818871 | 2.360031  |
| C  | 3.299756  | 0.766563 | 0.964512  |
| C  | 2.187016  | 1.596903 | 1.057540  |
| C  | 1.211056  | 1.600526 | 0.061343  |
| C  | 0.009500  | 2.528463 | 0.162938  |
| C  | 0.029764  | 3.640010 | -0.914233 |
| C  | 1.357214  | 4.399019 | -0.895540 |
| C  | -1.142657 | 4.605166 | -0.733064 |
| C  | -1.272014 | 1.709740 | 0.208359  |

|    |           |           |           |
|----|-----------|-----------|-----------|
| C  | -1.972109 | 1.350390  | -0.945564 |
| C  | -3.107957 | 0.552245  | -0.871284 |
| Br | -4.006262 | 0.111991  | -2.484898 |
| C  | -3.591925 | 0.080028  | 0.360623  |
| N  | -4.742538 | -0.722036 | 0.386199  |
| C  | -5.356641 | -1.261750 | 1.469191  |
| C  | -6.612700 | -2.099275 | 1.114655  |
| F  | -7.677654 | -1.587401 | 1.713618  |
| F  | -6.450859 | -3.348054 | 1.525432  |
| F  | -6.853910 | -2.126148 | -0.205430 |
| O  | -5.039253 | -1.160766 | 2.628183  |
| C  | -2.891130 | 0.443493  | 1.518002  |
| C  | -1.756922 | 1.241680  | 1.431575  |
| C  | 1.385957  | 0.741461  | -1.026830 |
| C  | 2.493820  | -0.089257 | -1.131326 |
| C  | 3.477509  | -0.092918 | -0.131792 |
| N  | 4.613643  | -0.914381 | -0.185688 |
| C  | 4.960805  | -1.792045 | -1.160600 |
| C  | 6.292344  | -2.535318 | -0.878801 |
| F  | 7.152543  | -2.303153 | -1.858814 |
| F  | 6.071489  | -3.839466 | -0.804565 |
| F  | 6.862161  | -2.146455 | 0.272546  |
| O  | 4.364799  | -2.043692 | -2.178292 |
| H  | 2.088383  | 2.254986  | 1.923089  |
| H  | 0.086339  | 3.042455  | 1.136045  |
| H  | -0.060685 | 3.161176  | -1.905902 |
| H  | 1.352456  | 5.203153  | -1.646134 |
| H  | 1.527970  | 4.863913  | 0.089887  |
| H  | 2.212191  | 3.742298  | -1.109995 |
| H  | -2.115534 | 4.096467  | -0.785190 |
| H  | -1.080300 | 5.107715  | 0.246190  |
| H  | -1.127446 | 5.384940  | -1.508983 |
| H  | -1.645935 | 1.699005  | -1.926398 |
| H  | -5.159353 | -0.917284 | -0.519449 |
| H  | -3.251354 | 0.091160  | 2.481727  |
| H  | -1.231189 | 1.503541  | 2.353134  |
| H  | 0.636847  | 0.706848  | -1.820666 |
| H  | 2.613942  | -0.750677 | -1.986218 |
| H  | 5.248638  | -0.833924 | 0.603185  |

-----  
11-conf01

- Electronic Energy (Eh): -7737.93455342

- Cartesian Coordinates:

|    |           |           |           |
|----|-----------|-----------|-----------|
| Br | 3.016464  | -2.461491 | 0.618210  |
| C  | 2.721389  | -0.641660 | 0.201711  |
| C  | 1.529165  | -0.047640 | 0.600736  |
| C  | 1.282506  | 1.300826  | 0.329940  |
| C  | 0.024354  | 2.027917  | 0.786710  |
| C  | 0.088756  | 2.550697  | 2.270670  |
| C  | -1.197569 | 3.339215  | 2.554140  |
| C  | 0.247696  | 1.444777  | 3.322164  |
| C  | 1.290410  | 3.501188  | 2.389915  |
| C  | -1.253993 | 1.297437  | 0.399886  |
| C  | -1.695056 | 0.117069  | 1.007724  |
| C  | -2.881127 | -0.486624 | 0.605122  |
| Br | -3.438593 | -2.066923 | 1.478932  |
| C  | -3.667680 | 0.041807  | -0.426744 |
| N  | -4.869340 | -0.576389 | -0.822271 |
| C  | -6.087097 | 0.005956  | -0.622269 |
| C  | -7.269368 | -0.855998 | -1.126557 |
| F  | -7.672626 | -0.417526 | -2.313854 |
| F  | -6.921750 | -2.146184 | -1.263284 |
| F  | -8.280945 | -0.789152 | -0.280788 |
| O  | -6.285302 | 1.092121  | -0.150654 |
| C  | -3.205115 | 1.209578  | -1.049216 |
| C  | -2.030029 | 1.827799  | -0.633685 |
| C  | 2.247535  | 2.014269  | -0.385243 |
| C  | 3.429911  | 1.411630  | -0.801557 |
| C  | 3.702966  | 0.069659  | -0.500632 |

|    |           |           |           |
|----|-----------|-----------|-----------|
| N  | 4.909349  | -0.541029 | -0.893557 |
| C  | 6.112272  | -0.181891 | -0.359401 |
| C  | 7.302482  | -0.995339 | -0.922124 |
| F  | 7.948890  | -0.277429 | -1.833489 |
| F  | 6.895519  | -2.132544 | -1.509606 |
| F  | 8.142312  | -1.310417 | 0.047133  |
| O  | 6.300939  | 0.695874  | 0.437921  |
| H  | 0.800810  | -0.658336 | 1.130034  |
| H  | 0.002872  | 2.954361  | 0.193541  |
| H  | -1.153952 | 3.790604  | 3.556929  |
| H  | -2.089615 | 2.696686  | 2.513956  |
| H  | -1.336204 | 4.154055  | 1.825601  |
| H  | 1.116521  | 0.801337  | 3.118045  |
| H  | -0.649381 | 0.816630  | 3.410921  |
| H  | 0.408639  | 1.902656  | 4.310004  |
| H  | 1.304620  | 3.966654  | 3.386873  |
| H  | 1.239723  | 4.312151  | 1.645752  |
| H  | 2.246908  | 2.974671  | 2.255225  |
| H  | -1.137658 | -0.342643 | 1.820428  |
| H  | -4.845490 | -1.565013 | -1.046587 |
| H  | -1.716919 | 2.739760  | -1.144264 |
| H  | 2.083634  | 3.063188  | -0.636129 |
| H  | 4.856960  | -1.415097 | -1.404962 |
| Cl | -4.078628 | 1.885864  | -2.382530 |
| Cl | 4.553974  | 2.336255  | -1.740142 |

-----  
11-conf02

- Electronic Energy (Eh): -7737.93458622

- Cartesian Coordinates:

|    |           |           |           |
|----|-----------|-----------|-----------|
| Br | 4.640125  | 2.347644  | -1.384591 |
| C  | 3.382465  | 1.229911  | -0.525446 |
| C  | 2.194747  | 1.783689  | -0.060891 |
| C  | 1.245110  | 0.997246  | 0.598139  |
| C  | -0.011002 | 1.672152  | 1.132829  |
| C  | 0.018881  | 1.962490  | 2.679836  |
| C  | 0.063826  | 0.705094  | 3.556685  |
| C  | 1.265196  | 2.808549  | 2.981395  |
| C  | -1.234413 | 2.775868  | 3.033288  |
| C  | -1.298320 | 1.045368  | 0.615422  |
| C  | -1.740732 | -0.234546 | 0.966147  |
| C  | -2.941952 | -0.729173 | 0.470247  |
| Br | -3.500989 | -2.455057 | 0.998839  |
| C  | -3.742925 | 0.014286  | -0.406370 |
| N  | -4.961406 | -0.494463 | -0.895895 |
| C  | -6.165760 | 0.036331  | -0.536799 |
| C  | -7.373230 | -0.687143 | -1.179777 |
| F  | -7.830268 | 0.022329  | -2.205202 |
| F  | -7.038008 | -1.903557 | -1.640137 |
| F  | -8.343894 | -0.834365 | -0.296424 |
| O  | -6.337577 | 0.992785  | 0.168482  |
| C  | -3.279162 | 1.284678  | -0.774982 |
| C  | -2.087963 | 1.790237  | -0.264236 |
| C  | 1.510077  | -0.366853 | 0.740594  |
| C  | 2.689403  | -0.922364 | 0.255158  |
| C  | 3.663451  | -0.133792 | -0.374186 |
| N  | 4.870385  | -0.690183 | -0.839761 |
| C  | 5.821521  | -1.173774 | 0.010305  |
| C  | 7.069210  | -1.730475 | -0.716401 |
| F  | 7.000197  | -3.055530 | -0.779342 |
| F  | 8.168462  | -1.390717 | -0.068644 |
| F  | 7.162447  | -1.265362 | -1.972967 |
| O  | 5.740393  | -1.230989 | 1.206951  |
| H  | 2.017903  | 2.851086  | -0.201422 |
| H  | 0.002475  | 2.678647  | 0.688826  |
| H  | 0.165609  | 1.001799  | 4.611715  |
| H  | 0.924739  | 0.063105  | 3.318624  |
| H  | -0.857969 | 0.111124  | 3.483679  |
| H  | 1.291690  | 3.722052  | 2.365737  |
| H  | 2.194800  | 2.248853  | 2.799735  |

|    |           |           |           |
|----|-----------|-----------|-----------|
| H  | 1.264070  | 3.119307  | 4.037001  |
| H  | -1.212488 | 3.066737  | 4.094447  |
| H  | -2.156819 | 2.201127  | 2.862070  |
| H  | -1.295870 | 3.698763  | 2.434450  |
| H  | -1.172844 | -0.862910 | 1.647888  |
| H  | -4.955532 | -1.406138 | -1.339802 |
| H  | -1.774568 | 2.788279  | -0.574219 |
| H  | 0.800794  | -1.038604 | 1.218277  |
| H  | 5.133135  | -0.523436 | -1.804835 |
| Cl | -4.173316 | 2.238382  | -1.910673 |
| Cl | 2.927123  | -2.631560 | 0.408555  |

-----  
11-conf03

- Electronic Energy (Eh): -7737.93447713

- Cartesian Coordinates:

|    |           |           |           |
|----|-----------|-----------|-----------|
| Br | -4.273306 | -2.071662 | -1.826260 |
| C  | -3.249617 | -1.042048 | -0.617560 |
| C  | -2.058908 | -1.565592 | -0.125891 |
| C  | -1.278349 | -0.847201 | 0.784768  |
| C  | 0.003029  | -1.491461 | 1.295336  |
| C  | 0.067739  | -1.738411 | 2.848961  |
| C  | 1.268945  | -2.653063 | 3.135385  |
| C  | 0.227965  | -0.461897 | 3.684393  |
| C  | -1.219236 | -2.461914 | 3.269875  |
| C  | 1.258816  | -0.855539 | 0.714038  |
| C  | 2.213114  | -1.682322 | 0.114208  |
| C  | 3.398965  | -1.155788 | -0.385341 |
| Br | 4.665226  | -2.324248 | -1.160813 |
| C  | 3.672078  | 0.216839  | -0.330488 |
| N  | 4.877196  | 0.744148  | -0.833128 |
| C  | 5.825077  | 1.292450  | -0.019324 |
| C  | 7.075438  | 1.792481  | -0.781900 |
| F  | 7.164965  | 1.245355  | -2.005317 |
| F  | 7.015406  | 3.110782  | -0.931251 |
| F  | 8.173110  | 1.488219  | -0.113646 |
| O  | 5.740405  | 1.440494  | 1.169238  |
| C  | 2.691829  | 1.043327  | 0.238149  |
| C  | 1.514428  | 0.516708  | 0.759115  |
| C  | -1.720684 | 0.424050  | 1.162694  |
| C  | -2.901186 | 0.954418  | 0.652370  |
| C  | -3.703981 | 0.227198  | -0.238383 |
| N  | -4.914453 | 0.750439  | -0.731909 |
| C  | -5.998683 | 0.953527  | 0.071367  |
| C  | -7.221461 | 1.526235  | -0.684610 |
| F  | -7.142309 | 1.292739  | -2.005010 |
| F  | -7.284251 | 2.841691  | -0.509456 |
| F  | -8.337121 | 0.982147  | -0.235609 |
| O  | -6.047380 | 0.770707  | 1.256992  |
| H  | -1.744524 | -2.558924 | -0.450081 |
| H  | -0.016085 | -2.509812 | 0.878974  |
| H  | 1.286465  | -2.929586 | 4.200292  |
| H  | 2.224898  | -2.159934 | 2.904485  |
| H  | 1.215571  | -3.585631 | 2.550785  |
| H  | -0.661954 | 0.181118  | 3.644668  |
| H  | 1.107445  | 0.124641  | 3.379848  |
| H  | 0.371024  | -0.734821 | 4.741008  |
| H  | -1.173892 | -2.729390 | 4.336453  |
| H  | -1.361229 | -3.392294 | 2.696707  |
| H  | -2.109809 | -1.833846 | 3.119476  |
| H  | 2.041573  | -2.757767 | 0.048783  |
| H  | 5.145038  | 0.502075  | -1.780720 |
| H  | 0.795659  | 1.214301  | 1.183591  |
| H  | -1.159162 | 1.038439  | 1.862461  |
| H  | -5.058636 | 0.755247  | -1.735717 |
| Cl | 2.918652  | 2.760373  | 0.266945  |
| Cl | -3.354128 | 2.562036  | 1.111385  |

-----  
11-conf04

- Electronic Energy (Eh): -7737.93437588

- Cartesian Coordinates:

|    |           |           |           |
|----|-----------|-----------|-----------|
| Br | -2.707107 | -2.027991 | -1.524378 |
| C  | -2.517467 | -0.477306 | -0.461206 |
| C  | -1.399052 | 0.328138  | -0.644192 |
| C  | -1.234751 | 1.494655  | 0.106984  |
| C  | -0.061429 | 2.447251  | -0.084344 |
| C  | -0.264947 | 3.487157  | -1.248738 |
| C  | -1.509242 | 4.328512  | -0.922400 |
| C  | 0.960558  | 4.410942  | -1.284954 |
| C  | -0.468334 | 2.856182  | -2.632644 |
| C  | 1.279749  | 1.727410  | -0.054702 |
| C  | 1.767568  | 0.937120  | -1.100841 |
| C  | 2.986583  | 0.278831  | -0.982241 |
| Br | 3.583384  | -0.792809 | -2.420133 |
| C  | 3.780548  | 0.391830  | 0.166532  |
| N  | 5.012494  | -0.281184 | 0.274477  |
| C  | 5.213928  | -1.293858 | 1.167162  |
| C  | 6.639769  | -1.892249 | 1.102887  |
| F  | 7.238599  | -1.625314 | -0.069534 |
| F  | 7.390588  | -1.372779 | 2.068014  |
| F  | 6.596284  | -3.202773 | 1.254684  |
| O  | 4.422933  | -1.694376 | 1.976429  |
| C  | 3.298208  | 1.208650  | 1.198856  |
| C  | 2.068396  | 1.850454  | 1.091922  |
| C  | -2.200202 | 1.799637  | 1.069196  |
| C  | -3.306545 | 0.979810  | 1.265567  |
| C  | -3.500438 | -0.171649 | 0.489368  |
| N  | -4.631342 | -0.992623 | 0.662101  |
| C  | -5.888967 | -0.572111 | 0.342209  |
| C  | -6.977959 | -1.641004 | 0.600023  |
| F  | -6.455715 | -2.876027 | 0.673225  |
| F  | -7.872913 | -1.628881 | -0.370786 |
| F  | -7.591147 | -1.391637 | 1.751829  |
| O  | -6.191804 | 0.517944  | -0.060485 |
| H  | -0.661138 | 0.027930  | -1.385539 |
| H  | -0.056476 | 3.076083  | 0.818606  |
| H  | -1.625820 | 5.132500  | -1.664594 |
| H  | -1.428788 | 4.801171  | 0.069612  |
| H  | -2.429164 | 3.725553  | -0.938916 |
| H  | 1.876611  | 3.864658  | -1.554409 |
| H  | 1.128749  | 4.890310  | -0.307218 |
| H  | 0.814297  | 5.208963  | -2.028700 |
| H  | -0.726464 | 3.643654  | -3.357023 |
| H  | -1.292908 | 2.128020  | -2.637309 |
| H  | 0.439556  | 2.367946  | -3.012589 |
| H  | 1.207169  | 0.814923  | -2.024795 |
| H  | 5.681648  | -0.172154 | -0.479595 |
| H  | 1.733183  | 2.468339  | 1.926394  |
| H  | -2.096065 | 2.688863  | 1.692425  |
| H  | -4.482297 | -1.985437 | 0.805533  |
| Cl | 4.253761  | 1.465489  | 2.619791  |
| Cl | -4.431172 | 1.380455  | 2.520139  |

11-conf05

- Electronic Energy (Eh): -7737.9342719

- Cartesian Coordinates:

|    |           |           |           |
|----|-----------|-----------|-----------|
| Br | -3.216620 | -1.709667 | -1.920634 |
| C  | -2.858032 | -0.177885 | -0.873038 |
| C  | -1.627451 | 0.454510  | -1.011328 |
| C  | -1.317492 | 1.582260  | -0.245788 |
| C  | 0.006328  | 2.329230  | -0.344997 |
| C  | 0.122961  | 3.288767  | -1.587138 |
| C  | 1.438484  | 4.070386  | -1.461174 |
| C  | 0.094608  | 2.572404  | -2.942860 |
| C  | -1.051414 | 4.277804  | -1.536870 |
| C  | 1.216267  | 1.438426  | -0.098010 |
| C  | 1.631837  | 0.425683  | -0.968843 |
| C  | 2.762756  | -0.332020 | -0.685576 |

|    |           |           |           |
|----|-----------|-----------|-----------|
| Br | 3.291006  | -1.669489 | -1.911540 |
| C  | 3.515714  | -0.130750 | 0.478401  |
| N  | 4.663875  | -0.899188 | 0.751022  |
| C  | 5.916534  | -0.359262 | 0.741719  |
| C  | 7.030314  | -1.386045 | 1.057781  |
| F  | 7.406505  | -1.267817 | 2.326111  |
| F  | 6.610852  | -2.648169 | 0.870890  |
| F  | 8.078310  | -1.180915 | 0.281040  |
| O  | 6.189843  | 0.795266  | 0.556722  |
| C  | 3.077377  | 0.867602  | 1.359304  |
| C  | 1.957700  | 1.640525  | 1.068757  |
| C  | -2.285015 | 2.055334  | 0.644129  |
| C  | -3.524265 | 1.434637  | 0.763396  |
| C  | -3.835363 | 0.290633  | 0.015054  |
| N  | -5.077204 | -0.359790 | 0.146386  |
| C  | -5.442756 | -1.010335 | 1.289105  |
| C  | -6.844006 | -1.661640 | 1.201576  |
| F  | -7.231592 | -1.838924 | -0.072350 |
| F  | -7.741856 | -0.880808 | 1.792496  |
| F  | -6.842624 | -2.838542 | 1.799501  |
| O  | -4.808380 | -1.069285 | 2.306527  |
| H  | -0.913078 | 0.035992  | -1.716388 |
| H  | -0.001987 | 3.023684  | 0.508125  |
| H  | 1.520114  | 4.811634  | -2.270581 |
| H  | 2.314991  | 3.408379  | -1.522819 |
| H  | 1.492460  | 4.612829  | -0.503681 |
| H  | -0.813402 | 1.964971  | -3.072292 |
| H  | 0.976599  | 1.935332  | -3.097569 |
| H  | 0.100092  | 3.321045  | -3.749802 |
| H  | -0.947522 | 5.029073  | -2.334261 |
| H  | -1.085689 | 4.815311  | -0.575677 |
| H  | -2.018715 | 3.772731  | -1.677499 |
| H  | 1.099403  | 0.219607  | -1.894142 |
| H  | 4.578969  | -1.909558 | 0.734991  |
| H  | 1.661051  | 2.410258  | 1.782812  |
| H  | -2.087281 | 2.938059  | 1.253981  |
| H  | -5.605758 | -0.549646 | -0.697884 |
| Cl | 3.911598  | 1.132440  | 2.853064  |
| Cl | -4.703305 | 2.121131  | 1.829886  |

11-conf06

- Electronic Energy (Eh): -7737.93436063

- Cartesian Coordinates:

|    |           |           |           |
|----|-----------|-----------|-----------|
| Br | 4.361778  | 1.587480  | -2.266418 |
| C  | 3.305213  | 1.185384  | -0.752685 |
| C  | 2.096137  | 1.850003  | -0.578897 |
| C  | 1.274209  | 1.573816  | 0.517710  |
| C  | -0.055850 | 2.307690  | 0.619678  |
| C  | -0.280060 | 3.162199  | 1.923083  |
| C  | 0.965428  | 4.031167  | 2.146983  |
| C  | -1.488426 | 4.082064  | 1.685096  |
| C  | -0.557406 | 2.332771  | 3.183936  |
| C  | -1.236937 | 1.418243  | 0.253087  |
| C  | -1.439794 | 0.154448  | 0.813053  |
| C  | -2.564522 | -0.592419 | 0.480665  |
| Br | -2.807319 | -2.282475 | 1.289362  |
| C  | -3.515464 | -0.126440 | -0.437064 |
| N  | -4.654339 | -0.888561 | -0.761389 |
| C  | -5.912980 | -0.497214 | -0.410665 |
| C  | -7.012422 | -1.492490 | -0.852669 |
| F  | -7.614874 | -1.041749 | -1.947291 |
| F  | -6.505325 | -2.703756 | -1.133497 |
| F  | -7.913824 | -1.634676 | 0.102198  |
| O  | -6.209202 | 0.524328  | 0.146974  |
| C  | -3.282252 | 1.125625  | -1.023282 |
| C  | -2.169601 | 1.884706  | -0.676083 |
| C  | 1.721153  | 0.628660  | 1.445764  |
| C  | 2.941894  | -0.017920 | 1.281658  |
| C  | 3.757134  | 0.231823  | 0.168186  |

|    |           |           |           |
|----|-----------|-----------|-----------|
| N  | 4.980522  | -0.440607 | -0.014141 |
| C  | 5.044811  | -1.779923 | -0.268760 |
| C  | 6.491106  | -2.300205 | -0.449289 |
| F  | 6.543270  | -3.183535 | -1.429041 |
| F  | 6.905623  | -2.878245 | 0.672573  |
| F  | 7.345760  | -1.304490 | -0.736527 |
| O  | 4.116224  | -2.539310 | -0.315843 |
| H  | 1.786134  | 2.586541  | -1.321922 |
| H  | -0.013474 | 3.066581  | -0.176039 |
| H  | 0.805941  | 4.714057  | 2.995264  |
| H  | 1.189186  | 4.644942  | 1.259635  |
| H  | 1.854526  | 3.422516  | 2.368648  |
| H  | -2.422412 | 3.512396  | 1.570053  |
| H  | -1.353339 | 4.701911  | 0.784207  |
| H  | -1.618212 | 4.762756  | 2.539872  |
| H  | -0.813852 | 3.008211  | 4.014289  |
| H  | 0.316564  | 1.753258  | 3.511174  |
| H  | -1.407225 | 1.647658  | 3.048336  |
| H  | -0.728302 | -0.268440 | 1.519672  |
| H  | -4.518495 | -1.849409 | -1.055936 |
| H  | -2.034456 | 2.856461  | -1.153083 |
| H  | 1.141822  | 0.384399  | 2.333063  |
| H  | 5.807810  | 0.116798  | -0.196770 |
| Cl | -4.365452 | 1.734564  | -2.229949 |
| Cl | 3.467120  | -1.120778 | 2.510148  |

-----  
11-conf07

- Electronic Energy (Eh): -7737.93429908

- Cartesian Coordinates:

|    |           |           |           |
|----|-----------|-----------|-----------|
| Br | 4.575020  | 1.553135  | -2.156072 |
| C  | 3.275989  | 0.932387  | -0.932820 |
| C  | 2.165715  | 1.726278  | -0.668013 |
| C  | 1.192121  | 1.313707  | 0.246126  |
| C  | 0.025558  | 2.247061  | 0.543558  |
| C  | 0.215597  | 3.116569  | 1.842212  |
| C  | 0.347944  | 2.301135  | 3.135021  |
| C  | 1.493142  | 3.953689  | 1.672030  |
| C  | -0.985658 | 4.064961  | 1.961092  |
| C  | -1.326312 | 1.562891  | 0.394686  |
| C  | -1.828984 | 0.618148  | 1.295710  |
| C  | -3.060623 | 0.012576  | 1.073022  |
| Br | -3.678137 | -1.272615 | 2.313583  |
| C  | -3.853452 | 0.332077  | -0.037194 |
| N  | -5.098216 | -0.289933 | -0.250194 |
| C  | -5.325077 | -1.128430 | -1.303186 |
| C  | -6.759640 | -1.708898 | -1.324823 |
| F  | -6.737684 | -2.976715 | -1.691923 |
| F  | -7.345661 | -1.631594 | -0.118576 |
| F  | -7.509307 | -1.026203 | -2.183220 |
| O  | -4.549570 | -1.393244 | -2.180322 |
| C  | -3.356631 | 1.302057  | -0.919086 |
| C  | -2.113674 | 1.891802  | -0.711486 |
| C  | 1.346669  | 0.064919  | 0.851722  |
| C  | 2.447472  | -0.736706 | 0.568334  |
| C  | 3.448991  | -0.314004 | -0.317846 |
| N  | 4.577918  | -1.112308 | -0.585250 |
| C  | 5.532974  | -1.357003 | 0.357231  |
| C  | 6.687666  | -2.250273 | -0.156169 |
| F  | 7.845378  | -1.817640 | 0.308899  |
| F  | 6.751666  | -2.258708 | -1.497607 |
| F  | 6.503632  | -3.502074 | 0.248307  |
| O  | 5.515786  | -0.983302 | 1.498371  |
| H  | 2.070083  | 2.689034  | -1.172184 |
| H  | 0.047076  | 2.992880  | -0.265150 |
| H  | 1.154277  | 1.555385  | 3.073041  |
| H  | -0.586905 | 1.793720  | 3.410377  |
| H  | 0.595098  | 2.977040  | 3.967814  |
| H  | 1.463516  | 4.553363  | 0.748092  |
| H  | 2.394876  | 3.324379  | 1.641228  |

|    |           |           |           |
|----|-----------|-----------|-----------|
| H  | 1.602691  | 4.650444  | 2.516655  |
| H  | -0.847864 | 4.749619  | 2.811741  |
| H  | -1.925285 | 3.515604  | 2.121134  |
| H  | -1.103307 | 4.677775  | 1.052912  |
| H  | -1.271001 | 0.331521  | 2.183927  |
| H  | -5.756892 | -0.309535 | 0.520674  |
| H  | -1.767589 | 2.634996  | -1.431423 |
| H  | 0.604129  | -0.326865 | 1.543619  |
| H  | 4.795909  | -1.323300 | -1.552818 |
| Cl | -4.309897 | 1.816705  | -2.269908 |
| Cl | 2.548819  | -2.300793 | 1.305645  |

-----  
11-conf08

- Electronic Energy (Eh): -7737.93430162

- Cartesian Coordinates:

|    |           |           |           |
|----|-----------|-----------|-----------|
| Br | -3.964924 | 0.902802  | 2.760644  |
| C  | -3.028524 | 0.686634  | 1.134622  |
| C  | -1.909474 | 1.475319  | 0.890778  |
| C  | -1.196763 | 1.362841  | -0.306586 |
| C  | 0.009615  | 2.269156  | -0.510842 |
| C  | -0.071942 | 3.246730  | -1.741810 |
| C  | 0.072983  | 2.559224  | -3.105528 |
| C  | -1.421187 | 3.976839  | -1.682870 |
| C  | 1.057668  | 4.279419  | -1.603714 |
| C  | 1.331661  | 1.522150  | -0.389499 |
| C  | 1.627880  | 0.368102  | -1.119911 |
| C  | 2.854778  | -0.268172 | -0.968674 |
| Br | 3.196829  | -1.835659 | -1.967503 |
| C  | 3.840125  | 0.221889  | -0.100949 |
| N  | 5.077444  | -0.434114 | 0.045986  |
| C  | 5.439805  | -1.054997 | 1.205945  |
| C  | 6.833808  | -1.723421 | 1.133840  |
| F  | 7.220390  | -1.933056 | -0.135405 |
| F  | 7.739819  | -0.939941 | 1.708502  |
| F  | 6.818804  | -2.886904 | 1.757535  |
| O  | 4.807900  | -1.078032 | 2.226432  |
| C  | 3.541366  | 1.391038  | 0.612773  |
| C  | 2.305977  | 2.016910  | 0.480595  |
| C  | -1.630118 | 0.413904  | -1.237194 |
| C  | -2.736425 | -0.389532 | -0.981151 |
| C  | -3.473344 | -0.261613 | 0.204978  |
| N  | -4.610911 | -1.053566 | 0.452730  |
| C  | -5.760810 | -0.918739 | -0.268945 |
| C  | -6.884448 | -1.882544 | 0.181904  |
| F  | -6.933135 | -2.930505 | -0.633151 |
| F  | -8.053495 | -1.269419 | 0.158581  |
| F  | -6.676256 | -2.341457 | 1.426709  |
| O  | -5.931859 | -0.179337 | -1.199501 |
| H  | -1.598116 | 2.198908  | 1.645816  |
| H  | -0.008775 | 2.949972  | 0.353266  |
| H  | -0.778664 | 1.906386  | -3.340735 |
| H  | 1.001658  | 1.973610  | -3.176426 |
| H  | 0.109862  | 3.323938  | -3.896350 |
| H  | -1.555520 | 4.491447  | -0.717880 |
| H  | -2.266632 | 3.285960  | -1.816784 |
| H  | -1.478772 | 4.735641  | -2.477979 |
| H  | 0.974479  | 5.038272  | -2.396278 |
| H  | 2.051134  | 3.814663  | -1.690451 |
| H  | 1.010184  | 4.803339  | -0.635591 |
| H  | 0.901930  | -0.067462 | -1.803206 |
| H  | 5.602006  | -0.653490 | -0.793634 |
| H  | 2.116736  | 2.919187  | 1.063888  |
| H  | -1.119038 | 0.270096  | -2.186136 |
| H  | -4.653571 | -1.568080 | 1.325595  |
| Cl | 4.730583  | 2.101640  | 1.652259  |
| Cl | -3.175323 | -1.591931 | -2.148435 |

-----



11-conf09

- Electronic Energy (Eh): -7737.93419918

- Cartesian Coordinates:

|    |           |           |           |
|----|-----------|-----------|-----------|
| Br | 4.007116  | 1.097798  | -2.603726 |
| C  | 3.076176  | 0.712550  | -1.005960 |
| C  | 1.937493  | 1.447526  | -0.694710 |
| C  | 1.227500  | 1.209288  | 0.485690  |
| C  | 0.002674  | 2.067405  | 0.771493  |
| C  | 0.090292  | 2.963201  | 2.062832  |
| C  | 1.411217  | 3.744059  | 2.011823  |
| C  | -1.078312 | 3.960284  | 2.030027  |
| C  | 0.017667  | 2.180792  | 3.380065  |
| C  | -1.305105 | 1.300341  | 0.625809  |
| C  | -2.296177 | 1.819807  | -0.212153 |
| C  | -3.509366 | 1.160813  | -0.375778 |
| Br | -4.804231 | 1.901041  | -1.535862 |
| C  | -3.791719 | -0.034120 | 0.298565  |
| N  | -5.021472 | -0.698167 | 0.127685  |
| C  | -5.115177 | -1.915020 | -0.483395 |
| C  | -6.566051 | -2.447823 | -0.563532 |
| F  | -7.465598 | -1.455531 | -0.459532 |
| F  | -6.766749 | -3.068126 | -1.711003 |
| F  | -6.788827 | -3.300838 | 0.430689  |
| O  | -4.200936 | -2.575626 | -0.894139 |
| C  | -2.799142 | -0.537786 | 1.152038  |
| C  | -1.575858 | 0.107923  | 1.300543  |
| C  | 1.683940  | 0.190952  | 1.327568  |
| C  | 2.811155  | -0.557003 | 1.003502  |
| C  | 3.544849  | -0.303865 | -0.164436 |
| N  | 4.702455  | -1.040994 | -0.479549 |
| C  | 5.848734  | -0.939410 | 0.252929  |
| C  | 6.999739  | -1.826290 | -0.279387 |
| F  | 6.792146  | -2.201320 | -1.552055 |
| F  | 7.098002  | -2.927353 | 0.456769  |
| F  | 8.146074  | -1.172749 | -0.224385 |
| O  | 6.000223  | -0.280132 | 1.245122  |
| H  | 1.608805  | 2.228925  | -1.381694 |
| H  | -0.012704 | 2.804967  | -0.044857 |
| H  | 1.469865  | 4.448693  | 2.855215  |
| H  | 1.495658  | 4.327615  | 1.080955  |
| H  | 2.283424  | 3.076380  | 2.071537  |
| H  | -2.051475 | 3.454222  | 2.116075  |
| H  | -1.081671 | 4.548324  | 1.098171  |
| H  | -0.995045 | 4.667699  | 2.868829  |
| H  | -0.006627 | 2.888566  | 4.222716  |
| H  | 0.894881  | 1.537724  | 3.535074  |
| H  | -0.892231 | 1.566061  | 3.446611  |
| H  | -2.120567 | 2.749371  | -0.755709 |
| H  | -5.872523 | -0.159595 | 0.245689  |
| H  | -0.845253 | -0.347933 | 1.964970  |
| H  | 1.174801  | -0.052970 | 2.256825  |
| H  | 4.756520  | -1.477838 | -1.393139 |
| Cl | -3.099422 | -1.970365 | 2.078623  |
| Cl | 3.282326  | -1.846569 | 2.059490  |

11-conf10

- Electronic Energy (Eh): -7737.9333905

- Cartesian Coordinates:

|    |           |           |           |
|----|-----------|-----------|-----------|
| Br | 2.794311  | -1.151970 | 2.313848  |
| C  | 2.619624  | 0.057526  | 0.871937  |
| C  | 1.457641  | 0.813982  | 0.770089  |
| C  | 1.285435  | 1.711375  | -0.286924 |
| C  | 0.042905  | 2.578520  | -0.448093 |
| C  | 0.082112  | 3.917817  | 0.379154  |
| C  | -1.199397 | 4.706852  | 0.076120  |
| C  | 0.211588  | 3.719585  | 1.895254  |
| C  | 1.290582  | 4.738927  | -0.098152 |
| C  | -1.246152 | 1.774139  | -0.350128 |

|    |           |           |           |
|----|-----------|-----------|-----------|
| C  | -1.764718 | 1.269535  | 0.847111  |
| C  | -2.934698 | 0.518379  | 0.851535  |
| Br | -3.575372 | -0.153087 | 2.498273  |
| C  | -3.649623 | 0.253390  | -0.323933 |
| N  | -4.835296 | -0.504800 | -0.303491 |
| C  | -4.932368 | -1.728841 | -0.900825 |
| C  | -6.328574 | -2.376882 | -0.739251 |
| F  | -6.214074 | -3.677797 | -0.549600 |
| F  | -6.998779 | -1.857966 | 0.303256  |
| F  | -7.053897 | -2.163999 | -1.832002 |
| O  | -4.076983 | -2.277805 | -1.538830 |
| C  | -3.138203 | 0.785748  | -1.516031 |
| C  | -1.954672 | 1.517430  | -1.526365 |
| C  | 2.314373  | 1.827691  | -1.224182 |
| C  | 3.486638  | 1.087919  | -1.105988 |
| C  | 3.661011  | 0.171173  | -0.059306 |
| N  | 4.832372  | -0.600456 | 0.057973  |
| C  | 5.174571  | -1.557510 | -0.853969 |
| C  | 6.494370  | -2.286975 | -0.505368 |
| F  | 6.792231  | -2.177863 | 0.800164  |
| F  | 7.498893  | -1.755772 | -1.194423 |
| F  | 6.404695  | -3.569648 | -0.802242 |
| O  | 4.583123  | -1.820692 | -1.864473 |
| H  | 0.681015  | 0.670994  | 1.518837  |
| H  | 0.072833  | 2.924221  | -1.492261 |
| H  | -1.165846 | 5.691457  | 0.566938  |
| H  | -2.096937 | 4.182561  | 0.435940  |
| H  | -1.318430 | 4.875173  | -1.006222 |
| H  | 1.075845  | 3.090886  | 2.156454  |
| H  | -0.692053 | 3.283878  | 2.342966  |
| H  | 0.360877  | 4.696776  | 2.379429  |
| H  | 1.292361  | 5.725537  | 0.389269  |
| H  | 1.261354  | 4.906108  | -1.186757 |
| H  | 2.243545  | 4.246130  | 0.144991  |
| H  | -1.267877 | 1.447716  | 1.797869  |
| H  | -5.550152 | -0.248979 | 0.368742  |
| H  | -1.593799 | 1.902763  | -2.481205 |
| H  | 2.221232  | 2.519908  | -2.062120 |
| H  | 5.293883  | -0.623848 | 0.960741  |
| Cl | -4.003017 | 0.577217  | -3.000963 |
| Cl | 4.755625  | 1.348619  | -2.255231 |

11-conf11

- Electronic Energy (Eh): -7737.93317322

- Cartesian Coordinates:

|    |           |           |           |
|----|-----------|-----------|-----------|
| Br | 3.818484  | -0.223888 | 2.541910  |
| C  | 3.080741  | 0.455903  | 0.939818  |
| C  | 1.881424  | 1.156519  | 1.001902  |
| C  | 1.292767  | 1.666097  | -0.160354 |
| C  | -0.027074 | 2.424648  | -0.184302 |
| C  | -0.059498 | 3.762938  | 0.645047  |
| C  | 1.164143  | 4.601165  | 0.248865  |
| C  | -1.331596 | 4.534386  | 0.259767  |
| C  | -0.065043 | 3.562014  | 2.166091  |
| C  | -1.231665 | 1.520284  | 0.044727  |
| C  | -2.307520 | 1.598554  | -0.843885 |
| C  | -3.453260 | 0.828275  | -0.666765 |
| Br | -4.895608 | 1.072122  | -1.852350 |
| C  | -3.549678 | -0.082918 | 0.393309  |
| N  | -4.682261 | -0.896623 | 0.589136  |
| C  | -5.008732 | -1.912670 | -0.262934 |
| C  | -6.278102 | -2.684323 | 0.171162  |
| F  | -6.511303 | -2.552240 | 1.487768  |
| F  | -7.337476 | -2.209909 | -0.476044 |
| F  | -6.153206 | -3.969652 | -0.099224 |
| O  | -4.445828 | -2.191573 | -1.285527 |
| C  | -2.462143 | -0.158230 | 1.274595  |
| C  | -1.327843 | 0.628097  | 1.115219  |
| C  | 1.960633  | 1.465257  | -1.370737 |

|    |           |           |           |
|----|-----------|-----------|-----------|
| C  | 3.172914  | 0.784583  | -1.427005 |
| C  | 3.756187  | 0.248541  | -0.270104 |
| N  | 4.973162  | -0.457118 | -0.316442 |
| C  | 5.096897  | -1.663266 | -0.944405 |
| C  | 6.525149  | -2.253123 | -0.856926 |
| F  | 7.188106  | -1.997227 | -1.979503 |
| F  | 6.474219  | -3.559958 | -0.679691 |
| F  | 7.221934  | -1.718603 | 0.159942  |
| O  | 4.239024  | -2.236115 | -1.557640 |
| H  | 1.418013  | 1.291524  | 1.976315  |
| H  | -0.127681 | 2.769187  | -1.224371 |
| H  | 1.130849  | 5.582711  | 0.745767  |
| H  | 1.193710  | 4.776444  | -0.838512 |
| H  | 2.105754  | 4.110667  | 0.536725  |
| H  | -2.243645 | 4.004918  | 0.572669  |
| H  | -1.390409 | 4.699610  | -0.827925 |
| H  | -1.335802 | 5.521503  | 0.746165  |
| H  | -0.214523 | 4.533399  | 2.661774  |
| H  | 0.886946  | 3.162054  | 2.541310  |
| H  | -0.882000 | 2.901272  | 2.492353  |
| H  | -2.266140 | 2.288445  | -1.688013 |
| H  | -5.091911 | -0.914019 | 1.516658  |
| H  | -0.519622 | 0.507537  | 1.833502  |
| H  | 1.544258  | 1.856368  | -2.300277 |
| H  | 5.704312  | -0.183806 | 0.330928  |
| Cl | -2.541270 | -1.265662 | 2.614078  |
| Cl | 3.982016  | 0.646462  | -2.951192 |

-----  
11-conf12

- Electronic Energy (Eh): -7737.93339566

- Cartesian Coordinates:

|    |           |           |           |
|----|-----------|-----------|-----------|
| Br | 3.741574  | 0.304203  | -2.906788 |
| C  | 2.981125  | 0.747973  | -1.235393 |
| C  | 1.844687  | 1.548199  | -1.203369 |
| C  | 1.238299  | 1.887208  | 0.009730  |
| C  | -0.045357 | 2.706123  | -0.040483 |
| C  | -0.139636 | 3.959691  | 0.906759  |
| C  | -0.478779 | 3.626537  | 2.366671  |
| C  | 1.187763  | 4.728337  | 0.841736  |
| C  | -1.256220 | 4.870064  | 0.368106  |
| C  | -1.268729 | 1.799853  | 0.014541  |
| C  | -1.406467 | 0.793699  | 0.974195  |
| C  | -2.539695 | -0.010275 | 0.993278  |
| Br | -2.672820 | -1.368567 | 2.299885  |
| C  | -3.583064 | 0.161729  | 0.071836  |
| N  | -4.723463 | -0.663089 | 0.099634  |
| C  | -5.021712 | -1.534131 | -0.908505 |
| C  | -6.310011 | -2.351406 | -0.648282 |
| F  | -6.155855 | -3.597038 | -1.056715 |
| F  | -6.629768 | -2.374092 | 0.656207  |
| F  | -7.329297 | -1.807499 | -1.304826 |
| O  | -4.416078 | -1.666732 | -1.936292 |
| C  | -3.443145 | 1.187602  | -0.873289 |
| C  | -2.298600 | 1.978691  | -0.910356 |
| C  | 1.827567  | 1.420014  | 1.187174  |
| C  | 2.980205  | 0.641362  | 1.153802  |
| C  | 3.575285  | 0.269553  | -0.060190 |
| N  | 4.725115  | -0.541352 | -0.099441 |
| C  | 4.713487  | -1.844976 | 0.306094  |
| C  | 6.085533  | -2.544580 | 0.153865  |
| F  | 6.716288  | -2.559489 | 1.323299  |
| F  | 6.873530  | -1.906520 | -0.727316 |
| F  | 5.925397  | -3.787423 | -0.260357 |
| O  | 3.781884  | -2.432052 | 0.783700  |
| H  | 1.416367  | 1.896746  | -2.144631 |
| H  | -0.052525 | 3.144010  | -1.050083 |
| H  | -0.587491 | 4.561248  | 2.937704  |
| H  | 0.301623  | 3.040534  | 2.870164  |
| H  | -1.428282 | 3.077856  | 2.449942  |

|    |           |           |           |
|----|-----------|-----------|-----------|
| H  | 1.463287  | 4.958048  | -0.199955 |
| H  | 2.016457  | 4.161759  | 1.289770  |
| H  | 1.101729  | 5.682078  | 1.384382  |
| H  | -1.317814 | 5.789892  | 0.969006  |
| H  | -2.240402 | 4.380321  | 0.411539  |
| H  | -1.066684 | 5.166348  | -0.675965 |
| H  | -0.620509 | 0.608479  | 1.705584  |
| H  | -5.186280 | -0.798745 | 0.991826  |
| H  | -2.227947 | 2.755616  | -1.672934 |
| H  | 1.418276  | 1.667120  | 2.164021  |
| H  | 5.505333  | -0.230229 | -0.667736 |
| Cl | -4.720524 | 1.517889  | -1.995540 |
| Cl | 3.703030  | 0.167637  | 2.655436  |

-----  
11-conf13

- Electronic Energy (Eh): -7737.93318745

- Cartesian Coordinates:

|    |           |           |           |
|----|-----------|-----------|-----------|
| Br | 3.779499  | 0.360488  | -2.853135 |
| C  | 3.049524  | 0.731200  | -1.150625 |
| C  | 1.875731  | 1.471805  | -1.067315 |
| C  | 1.291324  | 1.755657  | 0.170407  |
| C  | -0.027810 | 2.517121  | 0.178452  |
| C  | -0.121167 | 3.777687  | 1.117182  |
| C  | -1.308795 | 4.630581  | 0.640414  |
| C  | -0.351614 | 3.448355  | 2.598749  |
| C  | 1.164544  | 4.601989  | 0.961718  |
| C  | -1.211661 | 1.566794  | 0.304485  |
| C  | -2.293471 | 1.702530  | -0.568358 |
| C  | -3.410776 | 0.877492  | -0.467657 |
| Br | -4.868479 | 1.189912  | -1.618161 |
| C  | -3.467550 | -0.141040 | 0.492451  |
| N  | -4.568769 | -1.011897 | 0.604482  |
| C  | -4.860867 | -1.945859 | -0.347854 |
| C  | -6.095437 | -2.809516 | 0.005944  |
| F  | -5.919554 | -4.053897 | -0.396014 |
| F  | -6.327353 | -2.823917 | 1.329059  |
| F  | -7.176563 | -2.314930 | -0.588297 |
| O  | -4.294483 | -2.094019 | -1.395711 |
| C  | -2.372434 | -0.270220 | 1.359443  |
| C  | -1.266953 | 0.566223  | 1.277466  |
| C  | 1.939377  | 1.294647  | 1.319324  |
| C  | 3.127802  | 0.576099  | 1.234664  |
| C  | 3.703270  | 0.260300  | -0.004533 |
| N  | 4.891990  | -0.487805 | -0.096229 |
| C  | 4.961440  | -1.798421 | 0.280335  |
| C  | 6.363127  | -2.420690 | 0.071972  |
| F  | 7.032689  | -2.417820 | 1.219808  |
| F  | 7.085909  | -1.728743 | -0.824255 |
| F  | 6.255889  | -3.664364 | -0.356290 |
| O  | 4.077206  | -2.443601 | 0.772737  |
| H  | 1.401984  | 1.817754  | -1.987517 |
| H  | -0.104826 | 2.943573  | -0.833044 |
| H  | -1.371966 | 5.556072  | 1.232377  |
| H  | -2.265691 | 4.099529  | 0.753050  |
| H  | -1.199771 | 4.918665  | -0.417373 |
| H  | 0.491894  | 2.916962  | 3.059313  |
| H  | -1.261258 | 2.848204  | 2.747012  |
| H  | -0.479193 | 4.384053  | 3.164227  |
| H  | 1.073285  | 5.555185  | 1.504463  |
| H  | 1.361650  | 4.835513  | -0.096805 |
| H  | 2.043779  | 4.073689  | 1.357477  |
| H  | -2.279291 | 2.475946  | -1.337778 |
| H  | -4.969187 | -1.142913 | 1.526966  |
| H  | -0.443995 | 0.405478  | 1.972585  |
| H  | 1.548968  | 1.501096  | 2.313192  |
| H  | 5.635057  | -0.124487 | -0.683066 |
| Cl | -2.406289 | -1.512312 | 2.576229  |
| Cl | 3.919451  | 0.109207  | 2.703197  |

11-conf14

- Electronic Energy (Eh): -7737.92998291

- Cartesian Coordinates:

|    |           |           |           |
|----|-----------|-----------|-----------|
| Br | 3.278201  | -2.265077 | 1.131504  |
| C  | 2.739851  | -0.572476 | 0.486624  |
| C  | 1.489852  | -0.084982 | 0.851929  |
| C  | 1.058901  | 1.171372  | 0.412498  |
| C  | -0.283970 | 1.787766  | 0.778134  |
| C  | -0.510120 | 2.064966  | 2.312351  |
| C  | -0.676531 | 0.800062  | 3.164260  |
| C  | 0.691010  | 2.868697  | 2.830083  |
| C  | -1.781211 | 2.915485  | 2.463500  |
| C  | -1.463104 | 1.105193  | 0.098819  |
| C  | -1.687509 | -0.273023 | 0.154780  |
| C  | -2.822013 | -0.832108 | -0.424136 |
| Br | -3.062760 | -2.698686 | -0.328856 |
| C  | -3.776921 | -0.040525 | -1.077493 |
| N  | -4.947660 | -0.597742 | -1.639797 |
| C  | -6.178318 | -0.726312 | -1.063932 |
| C  | -6.303051 | -0.257487 | 0.413930  |
| F  | -6.023090 | 1.043178  | 0.537263  |
| F  | -7.531886 | -0.459363 | 0.842586  |
| F  | -5.464249 | -0.929917 | 1.206629  |
| O  | -7.134898 | -1.181315 | -1.632266 |
| C  | -3.514325 | 1.333803  | -1.173138 |
| C  | -2.382700 | 1.896392  | -0.594763 |
| C  | 1.912580  | 1.899172  | -0.420342 |
| C  | 3.153677  | 1.399470  | -0.801865 |
| C  | 3.604290  | 0.153938  | -0.342674 |
| N  | 4.870844  | -0.347515 | -0.699022 |
| C  | 6.028471  | 0.225179  | -0.258587 |
| C  | 7.301184  | -0.498071 | -0.760551 |
| F  | 7.822337  | 0.166179  | -1.785824 |
| F  | 7.032730  | -1.746966 | -1.175508 |
| F  | 8.200340  | -0.568571 | 0.203803  |
| O  | 6.118406  | 1.214807  | 0.415248  |
| H  | 0.873449  | -0.698355 | 1.504762  |
| H  | -0.252685 | 2.797211  | 0.341669  |
| H  | 0.251579  | 0.216264  | 3.234628  |
| H  | -1.481584 | 0.150218  | 2.789922  |
| H  | -0.945323 | 1.087649  | 4.192075  |
| H  | 0.829142  | 3.798140  | 2.254741  |
| H  | 1.626144  | 2.292448  | 2.768713  |
| H  | 0.536988  | 3.147045  | 3.883631  |
| H  | -1.905917 | 3.221281  | 3.513109  |
| H  | -2.685177 | 2.361716  | 2.168951  |
| H  | -1.729656 | 3.832414  | 1.854704  |
| H  | -0.982398 | -0.937922 | 0.648400  |
| H  | -4.917482 | -0.922690 | -2.602622 |
| H  | -2.230473 | 2.972937  | -0.682338 |
| H  | 1.611383  | 2.877938  | -0.796793 |
| H  | 4.921363  | -1.278974 | -1.096721 |
| Cl | -4.618285 | 2.355354  | -2.033831 |
| Cl | 4.129107  | 2.327192  | -1.890798 |

11-conf15

- Electronic Energy (Eh): -7737.929925689999

- Cartesian Coordinates:

|    |           |           |           |
|----|-----------|-----------|-----------|
| Br | -4.578921 | -2.543749 | -0.975649 |
| C  | -3.288891 | -1.307444 | -0.361952 |
| C  | -2.037141 | -1.774380 | 0.022792  |
| C  | -1.059947 | -0.896932 | 0.502177  |
| C  | 0.271234  | -1.475834 | 0.962258  |
| C  | 0.400559  | -1.643073 | 2.522876  |
| C  | 1.733104  | -2.347479 | 2.816437  |
| C  | 0.346138  | -0.324675 | 3.304461  |
| C  | -0.753158 | -2.537323 | 3.001922  |
| C  | 1.475391  | -0.839915 | 0.282701  |

|    |           |           |           |
|----|-----------|-----------|-----------|
| C  | 1.897122  | 0.474025  | 0.512905  |
| C  | 3.030673  | 0.978539  | -0.115479 |
| Br | 3.532217  | 2.763362  | 0.221008  |
| C  | 3.794939  | 0.193878  | -0.990743 |
| N  | 4.962179  | 0.693012  | -1.611761 |
| C  | 6.254526  | 0.593415  | -1.183952 |
| C  | 6.479494  | -0.117620 | 0.180827  |
| F  | 6.069482  | -1.388066 | 0.138088  |
| F  | 7.761352  | -0.105051 | 0.483064  |
| F  | 5.809252  | 0.492366  | 1.162204  |
| O  | 7.193397  | 1.024590  | -1.798503 |
| C  | 3.341163  | -1.108018 | -1.245629 |
| C  | 2.209146  | -1.616150 | -0.618109 |
| C  | -1.366611 | 0.465124  | 0.544510  |
| C  | -2.611986 | 0.932284  | 0.136803  |
| C  | -3.611079 | 0.054581  | -0.308646 |
| N  | -4.882236 | 0.522443  | -0.692766 |
| C  | -5.759104 | 1.060569  | 0.203786  |
| C  | -7.097910 | 1.499185  | -0.436508 |
| F  | -8.106053 | 1.223292  | 0.369632  |
| F  | -7.314905 | 0.878538  | -1.607723 |
| F  | -7.079306 | 2.807086  | -0.668941 |
| O  | -5.554786 | 1.244603  | 1.372515  |
| H  | -1.829977 | -2.843923 | -0.036457 |
| H  | 0.265919  | -2.513885 | 0.597897  |
| H  | 2.596037  | -1.731146 | 2.522835  |
| H  | 1.822561  | -2.557745 | 3.892949  |
| H  | 1.805979  | -3.307618 | 2.280631  |
| H  | -0.571192 | 0.244773  | 3.094093  |
| H  | 1.218062  | 0.314814  | 3.108632  |
| H  | 0.350644  | -0.542024 | 4.383401  |
| H  | -0.638204 | -2.759816 | 4.073405  |
| H  | -0.770333 | -3.498145 | 2.462719  |
| H  | -1.731415 | -2.052759 | 2.865659  |
| H  | 1.361466  | 1.127070  | 1.197289  |
| H  | 4.870226  | 1.168185  | -2.505814 |
| H  | 1.906136  | -2.640739 | -0.838343 |
| H  | -0.641180 | 1.202765  | 0.879587  |
| H  | -5.240521 | 0.240755  | -1.598659 |
| Cl | 4.201133  | -2.107014 | -2.370377 |
| Cl | -2.904217 | 2.639439  | 0.151828  |

11-conf16

- Electronic Energy (Eh): -7737.92997275

- Cartesian Coordinates:

|    |           |           |           |
|----|-----------|-----------|-----------|
| Br | 3.519876  | -2.584508 | 0.363715  |
| C  | 2.880813  | -0.808926 | 0.267004  |
| C  | 1.615148  | -0.525955 | 0.768618  |
| C  | 1.109858  | 0.778107  | 0.733208  |
| C  | -0.254417 | 1.177998  | 1.276945  |
| C  | -0.448263 | 0.984797  | 2.828316  |
| C  | -1.761621 | 1.670523  | 3.236330  |
| C  | -0.511970 | -0.480597 | 3.277246  |
| C  | 0.719509  | 1.680853  | 3.541459  |
| C  | -1.413905 | 0.650440  | 0.443407  |
| C  | -2.391115 | 1.554045  | 0.014385  |
| C  | -3.508170 | 1.120511  | -0.691039 |
| Br | -4.781460 | 2.389714  | -1.253728 |
| C  | -3.694784 | -0.235376 | -0.994212 |
| N  | -4.838519 | -0.692474 | -1.687184 |
| C  | -6.010774 | -1.156853 | -1.164895 |
| C  | -6.127156 | -1.153394 | 0.386057  |
| F  | -5.958929 | 0.074838  | 0.883954  |
| F  | -7.318246 | -1.586825 | 0.743914  |
| F  | -5.206346 | -1.946003 | 0.941347  |
| O  | -6.927314 | -1.552033 | -1.834915 |
| C  | -2.683249 | -1.125152 | -0.603927 |
| C  | -1.566269 | -0.695799 | 0.104086  |
| C  | 1.906828  | 1.771044  | 0.157835  |

|    |           |           |           |
|----|-----------|-----------|-----------|
| C  | 3.164533  | 1.481205  | -0.361531 |
| C  | 3.688673  | 0.182243  | -0.305263 |
| N  | 4.972216  | -0.114894 | -0.802130 |
| C  | 6.106759  | 0.358929  | -0.210422 |
| C  | 7.405440  | -0.102774 | -0.914039 |
| F  | 7.875716  | 0.875139  | -1.679716 |
| F  | 7.192984  | -1.171696 | -1.699063 |
| F  | 8.322840  | -0.423912 | -0.020241 |
| O  | 6.158234  | 1.096848  | 0.735293  |
| H  | 1.045617  | -1.341873 | 1.206955  |
| H  | -0.292239 | 2.270469  | 1.152490  |
| H  | -2.640164 | 1.169493  | 2.803058  |
| H  | -1.781767 | 2.726149  | 2.921265  |
| H  | -1.872494 | 1.649105  | 4.330871  |
| H  | 0.449489  | -0.998384 | 3.155531  |
| H  | -1.292963 | -1.044030 | 2.745146  |
| H  | -0.757950 | -0.521492 | 4.349246  |
| H  | 0.582230  | 1.632715  | 4.632320  |
| H  | 0.785441  | 2.743722  | 3.258743  |
| H  | 1.684237  | 1.208519  | 3.303642  |
| H  | -2.289056 | 2.616085  | 0.241871  |
| H  | -4.814384 | -0.713583 | -2.703315 |
| H  | -0.822657 | -1.441015 | 0.376724  |
| H  | 1.547113  | 2.799360  | 0.098158  |
| H  | 5.063794  | -0.873278 | -1.469051 |
| Cl | -2.819034 | -2.803130 | -1.017219 |
| Cl | 4.069067  | 2.749000  | -1.118084 |

-----  
11-conf17

- Electronic Energy (Eh): -7737.9299322

- Cartesian Coordinates:

|    |           |           |           |
|----|-----------|-----------|-----------|
| Br | 4.215359  | 2.635499  | -0.856615 |
| C  | 3.158706  | 1.221110  | -0.184766 |
| C  | 1.900893  | 1.506670  | 0.334813  |
| C  | 1.092005  | 0.494127  | 0.859280  |
| C  | -0.265673 | 0.883482  | 1.426674  |
| C  | -0.485307 | 0.563361  | 2.953368  |
| C  | -0.634443 | -0.930414 | 3.269386  |
| C  | 0.708826  | 1.130501  | 3.733812  |
| C  | -1.765411 | 1.279644  | 3.412165  |
| C  | -1.426811 | 0.458454  | 0.538734  |
| C  | -2.387982 | 1.412945  | 0.192334  |
| C  | -3.503929 | 1.064949  | -0.560716 |
| Br | -4.754817 | 2.400487  | -1.008823 |
| C  | -3.705236 | -0.252617 | -0.994932 |
| N  | -4.848479 | -0.624770 | -1.737824 |
| C  | -6.032658 | -1.118178 | -1.272113 |
| C  | -6.166274 | -1.256694 | 0.271251  |
| F  | -5.990626 | -0.081712 | 0.882263  |
| F  | -7.365980 | -1.707240 | 0.575180  |
| F  | -5.260483 | -2.107944 | 0.760341  |
| O  | -6.947155 | -1.435859 | -1.984795 |
| C  | -2.708828 | -1.190020 | -0.684784 |
| C  | -1.592579 | -0.846465 | 0.069539  |
| C  | 1.578502  | -0.815912 | 0.819462  |
| C  | 2.828105  | -1.101763 | 0.278881  |
| C  | 3.656690  | -0.087349 | -0.222079 |
| N  | 4.933525  | -0.370628 | -0.743080 |
| C  | 5.956469  | -0.815423 | 0.043127  |
| C  | 7.274436  | -1.045128 | -0.734741 |
| F  | 7.279675  | -0.393089 | -1.908931 |
| F  | 7.427594  | -2.339582 | -0.989453 |
| F  | 8.305640  | -0.624612 | -0.025336 |
| O  | 5.892806  | -1.064278 | 1.215948  |
| H  | 1.554501  | 2.541378  | 0.342084  |
| H  | -0.273350 | 1.983316  | 1.395638  |
| H  | -0.894639 | -1.052405 | 4.331806  |
| H  | 0.297422  | -1.489683 | 3.109103  |
| H  | -1.438887 | -1.399400 | 2.683382  |

|    |           |           |           |
|----|-----------|-----------|-----------|
| H  | 0.837186  | 2.207869  | 3.541566  |
| H  | 1.649136  | 0.625623  | 3.467122  |
| H  | 0.553129  | 0.999697  | 4.815373  |
| H  | -1.892234 | 1.163348  | 4.498951  |
| H  | -2.663601 | 0.869111  | 2.927117  |
| H  | -1.724626 | 2.359411  | 3.196392  |
| H  | -2.274109 | 2.446402  | 0.522571  |
| H  | -4.812362 | -0.555769 | -2.751466 |
| H  | -0.859180 | -1.623033 | 0.275204  |
| H  | 0.998983  | -1.651230 | 1.205167  |
| H  | 5.161738  | -0.013246 | -1.664256 |
| Cl | -2.863450 | -2.818108 | -1.259270 |
| Cl | 3.337689  | -2.755193 | 0.198854  |

-----  
11-conf18

- Electronic Energy (Eh): -7737.92969221

- Cartesian Coordinates:

|    |           |           |           |
|----|-----------|-----------|-----------|
| Br | -2.277351 | -1.757365 | -1.720265 |
| C  | -2.148651 | -0.299401 | -0.525668 |
| C  | -1.022701 | 0.513753  | -0.578249 |
| C  | -0.903040 | 1.613166  | 0.275449  |
| C  | 0.285626  | 2.564214  | 0.218767  |
| C  | 0.127003  | 3.716424  | -0.842517 |
| C  | -1.035960 | 4.613990  | -0.387560 |
| C  | 1.415211  | 4.551306  | -0.852611 |
| C  | -0.188911 | 3.232112  | -2.264659 |
| C  | 1.601614  | 1.798176  | 0.219125  |
| C  | 2.158535  | 1.199790  | -0.915680 |
| C  | 3.335435  | 0.463622  | -0.827819 |
| Br | 4.049908  | -0.291002 | -2.399857 |
| C  | 3.999789  | 0.285426  | 0.393779  |
| N  | 5.189349  | -0.471486 | 0.490986  |
| C  | 5.329234  | -1.794513 | 0.796865  |
| C  | 4.015944  | -2.595087 | 1.024483  |
| F  | 3.228444  | -2.548894 | -0.053152 |
| F  | 4.301308  | -3.855972 | 1.277023  |
| F  | 3.323740  | -2.105138 | 2.056003  |
| O  | 6.393437  | -2.346232 | 0.887411  |
| C  | 3.451745  | 0.918450  | 1.518839  |
| C  | 2.275072  | 1.654613  | 1.434865  |
| C  | -1.918788 | 1.843084  | 1.205198  |
| C  | -3.034205 | 1.013793  | 1.270069  |
| C  | -3.183613 | -0.068254 | 0.391121  |
| N  | -4.322283 | -0.895488 | 0.432215  |
| C  | -5.560886 | -0.443340 | 0.081894  |
| C  | -6.662640 | -1.524461 | 0.191606  |
| F  | -7.504096 | -1.427992 | -0.821340 |
| F  | -7.336490 | -1.367579 | 1.325679  |
| F  | -6.145543 | -2.763775 | 0.190690  |
| O  | -5.841078 | 0.678177  | -0.243206 |
| H  | -0.241143 | 0.277120  | -1.298858 |
| H  | 0.277078  | 3.097803  | 1.181139  |
| H  | -1.135761 | 5.475236  | -1.065053 |
| H  | -0.869199 | 5.007182  | 0.628068  |
| H  | -1.995655 | 4.076251  | -0.393588 |
| H  | 2.273061  | 3.981119  | -1.237635 |
| H  | 1.671129  | 4.901146  | 0.160332  |
| H  | 1.288446  | 5.438271  | -1.491769 |
| H  | -0.371018 | 4.103232  | -2.912245 |
| H  | -1.094159 | 2.608331  | -2.294140 |
| H  | 0.636146  | 2.670578  | -2.723260 |
| H  | 1.688329  | 1.300591  | -1.891003 |
| H  | 6.077250  | 0.003139  | 0.349765  |
| H  | 1.882694  | 2.117688  | 2.341494  |
| H  | -1.848199 | 2.676163  | 1.905998  |
| H  | -4.181348 | -1.897780 | 0.496186  |
| Cl | 4.261781  | 0.795508  | 3.045454  |
| Cl | -4.226879 | 1.313492  | 2.489539  |

11-conf19

- Electronic Energy (Eh): -7737.929781130001

- Cartesian Coordinates:

|    |           |           |           |
|----|-----------|-----------|-----------|
| Br | -2.362792 | -1.797798 | -1.699325 |
| C  | -2.198321 | -0.325221 | -0.527078 |
| C  | -1.063934 | 0.474281  | -0.610262 |
| C  | -0.916362 | 1.584077  | 0.225411  |
| C  | 0.277677  | 2.526789  | 0.143327  |
| C  | 0.122743  | 3.662962  | -0.935674 |
| C  | -0.107953 | 3.154760  | -2.365488 |
| C  | -1.086639 | 4.526428  | -0.541372 |
| C  | 1.384632  | 4.536356  | -0.898905 |
| C  | 1.598254  | 1.769360  | 0.147233  |
| C  | 2.113702  | 1.092712  | -0.963416 |
| C  | 3.307326  | 0.384125  | -0.875321 |
| Br | 3.963080  | -0.477393 | -2.417712 |
| C  | 4.031006  | 0.311698  | 0.323340  |
| N  | 5.240537  | -0.412953 | 0.420354  |
| C  | 5.425333  | -1.706566 | 0.815241  |
| C  | 4.143352  | -2.513438 | 1.165297  |
| F  | 4.469558  | -3.745799 | 1.496848  |
| F  | 3.489275  | -1.960612 | 2.189849  |
| F  | 3.305380  | -2.564070 | 0.126668  |
| O  | 6.505224  | -2.228848 | 0.893827  |
| C  | 3.522232  | 1.019735  | 1.421732  |
| C  | 2.328831  | 1.728693  | 1.337516  |
| C  | -1.914905 | 1.837359  | 1.168354  |
| C  | -3.038445 | 1.022763  | 1.263717  |
| C  | -3.215075 | -0.069939 | 0.402962  |
| N  | -4.362106 | -0.883414 | 0.474651  |
| C  | -5.600902 | -0.422186 | 0.137030  |
| C  | -6.713173 | -1.488769 | 0.278807  |
| F  | -7.567838 | -1.397619 | -0.723536 |
| F  | -7.368916 | -1.307180 | 1.419768  |
| F  | -6.210405 | -2.733900 | 0.289220  |
| O  | -5.873238 | 0.697719  | -0.200039 |
| H  | -0.299601 | 0.215195  | -1.340768 |
| H  | 0.273000  | 3.078179  | 1.095584  |
| H  | -0.331489 | 4.008988  | -3.022526 |
| H  | -0.963478 | 2.466024  | -2.425646 |
| H  | 0.775835  | 2.659242  | -2.789797 |
| H  | -0.986545 | 4.918759  | 0.483341  |
| H  | -2.030102 | 3.963954  | -0.601104 |
| H  | -1.171283 | 5.388474  | -1.219911 |
| H  | 1.269024  | 5.400869  | -1.570122 |
| H  | 2.277708  | 3.980062  | -1.219745 |
| H  | 1.573767  | 4.922214  | 0.115695  |
| H  | 1.597971  | 1.109807  | -1.920542 |
| H  | 6.109711  | 0.066738  | 0.201144  |
| H  | 1.970331  | 2.254555  | 2.223637  |
| H  | -1.824183 | 2.679618  | 1.855648  |
| H  | -4.231266 | -1.886074 | 0.552237  |
| Cl | 4.402941  | 1.026959  | 2.913782  |
| Cl | -4.207302 | 1.353946  | 2.497969  |

11-conf20

- Electronic Energy (Eh): -7737.92964981

- Cartesian Coordinates:

|    |           |          |           |
|----|-----------|----------|-----------|
| Br | -4.344934 | 1.430074 | 2.200877  |
| C  | -3.005620 | 0.940135 | 0.961868  |
| C  | -1.883163 | 1.749677 | 0.826903  |
| C  | -0.879974 | 1.433062 | -0.093248 |
| C  | 0.302768  | 2.381132 | -0.245090 |
| C  | 0.153630  | 3.407863 | -1.429339 |
| C  | -0.001499 | 2.762940 | -2.813063 |
| C  | -1.095918 | 4.261629 | -1.160346 |
| C  | 1.386672  | 4.322297 | -1.427920 |
| C  | 1.637652  | 1.655579 | -0.149431 |

|    |           |           |           |
|----|-----------|-----------|-----------|
| C  | 2.164505  | 0.852593  | -1.166849 |
| C  | 3.376525  | 0.191498  | -0.997067 |
| Br | 4.047366  | -0.846779 | -2.419143 |
| C  | 4.108195  | 0.294712  | 0.194604  |
| N  | 5.337679  | -0.378749 | 0.374325  |
| C  | 5.560801  | -1.602353 | 0.937011  |
| C  | 4.303362  | -2.391448 | 1.398690  |
| F  | 4.665255  | -3.561238 | 1.884158  |
| F  | 3.639284  | -1.728200 | 2.348770  |
| F  | 3.462230  | -2.598385 | 0.382589  |
| O  | 6.655611  | -2.078433 | 1.078034  |
| C  | 3.586592  | 1.126272  | 1.195996  |
| C  | 2.374743  | 1.787911  | 1.030204  |
| C  | -1.017041 | 0.260981  | -0.839720 |
| C  | -2.130761 | -0.558082 | -0.686833 |
| C  | -3.161774 | -0.228068 | 0.205167  |
| N  | -4.303481 | -1.041284 | 0.339819  |
| C  | -5.222683 | -1.170870 | -0.659781 |
| C  | -6.399839 | -2.106720 | -0.294770 |
| F  | -6.205324 | -3.306178 | -0.831146 |
| F  | -7.536950 | -1.614502 | -0.751162 |
| F  | -6.515333 | -2.266038 | 1.033770  |
| O  | -5.159798 | -0.671370 | -1.749987 |
| H  | -1.801329 | 2.649223  | 1.438773  |
| H  | 0.271934  | 3.020612  | 0.649822  |
| H  | -0.222244 | 3.544973  | -3.555414 |
| H  | -0.832846 | 2.043297  | -2.843352 |
| H  | 0.915314  | 2.261501  | -3.151876 |
| H  | -1.048852 | 4.747375  | -0.172425 |
| H  | -2.018148 | 3.663475  | -1.203239 |
| H  | -1.179908 | 5.055934  | -1.917170 |
| H  | 1.274578  | 5.113951  | -2.184236 |
| H  | 2.307887  | 3.766857  | -1.658236 |
| H  | 1.521987  | 4.810057  | -0.449168 |
| H  | 1.644196  | 0.731617  | -2.113955 |
| H  | 6.192125  | 0.091899  | 0.087957  |
| H  | 2.007642  | 2.416278  | 1.843003  |
| H  | -0.250214 | -0.056189 | -1.543736 |
| H  | -4.560249 | -1.355366 | 1.269151  |
| Cl | 4.474361  | 1.350758  | 2.666884  |
| Cl | -2.211915 | -2.029331 | -1.596572 |

11-conf21

- Electronic Energy (Eh): -7737.9295986100005

- Cartesian Coordinates:

|    |           |           |           |
|----|-----------|-----------|-----------|
| Br | 3.342747  | -1.016561 | 2.351423  |
| C  | 2.646833  | -0.064721 | 0.874995  |
| C  | 1.477377  | 0.668445  | 1.043272  |
| C  | 0.938258  | 1.402609  | -0.018186 |
| C  | -0.323701 | 2.248267  | 0.086016  |
| C  | -0.221244 | 3.495636  | 1.040155  |
| C  | 1.020100  | 4.302295  | 0.633090  |
| C  | -1.471767 | 4.361862  | 0.826042  |
| C  | -0.123880 | 3.145612  | 2.530056  |
| C  | -1.585418 | 1.414921  | 0.267929  |
| C  | -2.627777 | 1.577675  | -0.649832 |
| C  | -3.807888 | 0.850735  | -0.533254 |
| Br | -5.186496 | 1.143867  | -1.783063 |
| C  | -3.989214 | -0.080039 | 0.499163  |
| N  | -5.181203 | -0.828899 | 0.626139  |
| C  | -5.459573 | -2.072918 | 0.137914  |
| C  | -4.345165 | -2.750253 | -0.708270 |
| F  | -3.239473 | -2.942828 | 0.015332  |
| F  | -4.765830 | -3.920132 | -1.143748 |
| F  | -4.016307 | -2.000973 | -1.763445 |
| O  | -6.501390 | -2.642231 | 0.327025  |
| C  | -2.946667 | -0.218381 | 1.427597  |
| C  | -1.764959 | 0.505495  | 1.313283  |
| C  | 1.597407  | 1.351121  | -1.248854 |

|    |           |           |           |
|----|-----------|-----------|-----------|
| C  | 2.755743  | 0.599828  | -1.420137 |
| C  | 3.317434  | -0.116380 | -0.354000 |
| N  | 4.503488  | -0.858830 | -0.510504 |
| C  | 5.709803  | -0.261934 | -0.734103 |
| C  | 6.877558  | -1.268781 | -0.866058 |
| F  | 6.568020  | -2.461947 | -0.333013 |
| F  | 7.952440  | -0.809369 | -0.252024 |
| F  | 7.164752  | -1.460326 | -2.148659 |
| O  | 5.904522  | 0.915234  | -0.868604 |
| H  | 1.012210  | 0.667614  | 2.025980  |
| H  | -0.432104 | 2.703467  | -0.909508 |
| H  | 1.082248  | 5.228954  | 1.223522  |
| H  | 0.983573  | 4.585154  | -0.431139 |
| H  | 1.948340  | 3.735646  | 0.799117  |
| H  | -2.387818 | 3.846249  | 1.151160  |
| H  | -1.595259 | 4.637760  | -0.233494 |
| H  | -1.389920 | 5.294145  | 1.404909  |
| H  | -0.128635 | 4.073474  | 3.122205  |
| H  | 0.808933  | 2.619205  | 2.775929  |
| H  | -0.977194 | 2.540980  | 2.871116  |
| H  | -2.523479 | 2.286596  | -1.472526 |
| H  | -5.944782 | -0.431729 | 1.167238  |
| H  | -0.994158 | 0.333773  | 2.060749  |
| H  | 1.203735  | 1.897102  | -2.107467 |
| H  | 4.498367  | -1.832819 | -0.228032 |
| Cl | -3.135614 | -1.305559 | 2.764551  |
| Cl | 3.481151  | 0.529231  | -2.990436 |

-----  
11-conf22

- Electronic Energy (Eh): -7737.9296587

- Cartesian Coordinates:

|    |           |           |           |
|----|-----------|-----------|-----------|
| Br | -4.339828 | 1.423936  | 2.206788  |
| C  | -3.003486 | 0.936599  | 0.963615  |
| C  | -1.881048 | 1.746059  | 0.828007  |
| C  | -0.879962 | 1.431220  | -0.095046 |
| C  | 0.302822  | 2.379248  | -0.246765 |
| C  | 0.153978  | 3.406487  | -1.430516 |
| C  | 0.002922  | 2.762387  | -2.815048 |
| C  | -1.097562 | 4.257799  | -1.163192 |
| C  | 1.385540  | 4.322901  | -1.426098 |
| C  | 1.637875  | 1.653973  | -0.151307 |
| C  | 2.163498  | 0.848990  | -1.167792 |
| C  | 3.375921  | 0.188557  | -0.998294 |
| Br | 4.044995  | -0.852662 | -2.419044 |
| C  | 4.109278  | 0.294515  | 0.192102  |
| N  | 5.339180  | -0.378272 | 0.371530  |
| C  | 5.563390  | -1.600525 | 0.936702  |
| C  | 4.306786  | -2.388770 | 1.402018  |
| F  | 4.669568  | -3.557315 | 1.889797  |
| F  | 3.643780  | -1.723436 | 2.351398  |
| F  | 3.464401  | -2.598294 | 0.387479  |
| O  | 6.658481  | -2.076187 | 1.077011  |
| C  | 3.588892  | 1.128068  | 1.192458  |
| C  | 2.376600  | 1.788985  | 1.026996  |
| C  | -1.019226 | 0.261054  | -0.844152 |
| C  | -2.133070 | -0.557781 | -0.690908 |
| C  | -3.161772 | -0.229663 | 0.204401  |
| N  | -4.303636 | -1.042648 | 0.339524  |
| C  | -5.226154 | -1.167065 | -0.657490 |
| C  | -6.405441 | -2.100287 | -0.292696 |
| F  | -6.502403 | -2.285812 | 1.033888  |
| F  | -6.230247 | -3.289814 | -0.856593 |
| F  | -7.545146 | -1.588635 | -0.721200 |
| O  | -5.166063 | -0.663350 | -1.745964 |
| H  | -1.797561 | 2.644178  | 1.441755  |
| H  | 0.271874  | 3.018448  | 0.648341  |
| H  | -0.217226 | 3.544676  | -3.557308 |
| H  | -0.827393 | 2.041670  | -2.847900 |
| H  | 0.921318  | 2.262547  | -3.151965 |

|    |           |           |           |
|----|-----------|-----------|-----------|
| H  | -1.053213 | 4.742822  | -0.174788 |
| H  | -2.018630 | 3.658002  | -1.208205 |
| H  | -1.181579 | 5.052561  | -1.919535 |
| H  | 1.273876  | 5.114579  | -2.182450 |
| H  | 2.308119  | 3.768925  | -1.654535 |
| H  | 1.517930  | 4.810621  | -0.446923 |
| H  | 1.641970  | 0.725888  | -2.113953 |
| H  | 6.193048  | 0.091614  | 0.082201  |
| H  | 2.010491  | 2.418979  | 1.838984  |
| H  | -0.254240 | -0.054719 | -1.550762 |
| H  | -4.556332 | -1.362774 | 1.267886  |
| Cl | 4.478680  | 1.355963  | 2.661596  |
| Cl | -2.217488 | -2.026354 | -1.604683 |

-----  
11-conf23

- Electronic Energy (Eh): -7737.92961432

- Cartesian Coordinates:

|    |           |           |           |
|----|-----------|-----------|-----------|
| Br | 4.104923  | 1.518936  | -2.263986 |
| C  | 2.915225  | 0.953942  | -0.909719 |
| C  | 1.775912  | 1.709493  | -0.655207 |
| C  | 0.881005  | 1.336337  | 0.351207  |
| C  | -0.323904 | 2.225612  | 0.629210  |
| C  | -0.121555 | 3.223111  | 1.830007  |
| C  | 0.176008  | 2.545901  | 3.174197  |
| C  | 1.063456  | 4.139879  | 1.486906  |
| C  | -1.388966 | 4.079501  | 1.959465  |
| C  | -1.630876 | 1.444894  | 0.617212  |
| C  | -2.471399 | 1.589511  | -0.490787 |
| C  | -3.665866 | 0.882632  | -0.585898 |
| Br | -4.766354 | 1.150134  | -2.091085 |
| C  | -4.065964 | -0.007030 | 0.420490  |
| N  | -5.274318 | -0.735025 | 0.334789  |
| C  | -5.474251 | -1.994503 | -0.152455 |
| C  | -4.228411 | -2.715413 | -0.739858 |
| F  | -4.574316 | -3.901839 | -1.195703 |
| F  | -3.695801 | -2.016197 | -1.745132 |
| F  | -3.282418 | -2.879948 | 0.188158  |
| O  | -6.543082 | -2.544720 | -0.150904 |
| C  | -3.231550 | -0.121607 | 1.542324  |
| C  | -2.036258 | 0.582000  | 1.640110  |
| C  | 1.142401  | 0.164216  | 1.063803  |
| C  | 2.272342  | -0.600248 | 0.793208  |
| C  | 3.195844  | -0.213897 | -0.189449 |
| N  | 4.354514  | -0.972025 | -0.446352 |
| C  | 5.374523  | -1.063383 | 0.454465  |
| C  | 6.555107  | -1.934717 | -0.037195 |
| F  | 6.522120  | -2.114807 | -1.367663 |
| F  | 6.501430  | -3.131507 | 0.535425  |
| F  | 7.705776  | -1.364701 | 0.272495  |
| O  | 5.397721  | -0.574562 | 1.551131  |
| H  | 1.595194  | 2.611320  | -1.242018 |
| H  | -0.393429 | 2.891665  | -0.243754 |
| H  | 0.406189  | 3.316238  | 3.925860  |
| H  | 1.048276  | 1.878346  | 3.116320  |
| H  | -0.681080 | 1.978005  | 3.561176  |
| H  | 0.911020  | 4.654402  | 0.524538  |
| H  | 2.009801  | 3.581866  | 1.429524  |
| H  | 1.179843  | 4.912373  | 2.261813  |
| H  | -1.247788 | 4.855183  | 2.727356  |
| H  | -2.262250 | 3.476328  | 2.248891  |
| H  | -1.628200 | 4.586229  | 1.010705  |
| H  | -2.193283 | 2.265896  | -1.300540 |
| H  | -6.121255 | -0.309074 | 0.702068  |
| H  | -1.440248 | 0.441548  | 2.538655  |
| H  | 0.463064  | -0.194585 | 1.834424  |
| H  | 4.529111  | -1.272144 | -1.399038 |
| Cl | -3.703509 | -1.153625 | 2.852536  |
| Cl | 2.509895  | -2.073659 | 1.671592  |

11-conf24

- Electronic Energy (Eh): -7737.929676850001

- Cartesian Coordinates:

|    |           |           |           |
|----|-----------|-----------|-----------|
| Br | -3.161974 | -2.121234 | -1.416967 |
| C  | -2.743368 | -0.382415 | -0.806428 |
| C  | -1.451590 | 0.098312  | -0.989959 |
| C  | -1.097474 | 1.373931  | -0.541629 |
| C  | 0.294982  | 1.968079  | -0.708999 |
| C  | 0.593700  | 2.541540  | -2.144465 |
| C  | 0.564638  | 1.491442  | -3.261847 |
| C  | -0.463608 | 3.611048  | -2.457879 |
| C  | 1.978743  | 3.203983  | -2.113626 |
| C  | 1.395202  | 1.093451  | -0.124567 |
| C  | 1.782827  | -0.137222 | -0.665312 |
| C  | 2.819541  | -0.869841 | -0.097340 |
| Br | 3.275709  | -2.532035 | -0.858815 |
| C  | 3.518907  | -0.402972 | 1.024520  |
| N  | 4.587950  | -1.132518 | 1.592105  |
| C  | 5.922328  | -1.017966 | 1.329327  |
| C  | 6.327174  | 0.010962  | 0.235663  |
| F  | 7.632602  | -0.014423 | 0.062217  |
| F  | 5.741845  | -0.266378 | -0.932804 |
| F  | 5.972502  | 1.250930  | 0.582809  |
| O  | 6.768161  | -1.663637 | 1.888555  |
| C  | 3.098270  | 0.813233  | 1.581090  |
| C  | 2.061937  | 1.548218  | 1.015922  |
| C  | -2.082326 | 2.147325  | 0.077812  |
| C  | -3.380051 | 1.672874  | 0.239255  |
| C  | -3.738105 | 0.386229  | -0.187351 |
| N  | -5.041090 | -0.114416 | -0.003311 |
| C  | -5.549334 | -0.385422 | 1.234028  |
| C  | -6.990985 | -0.947022 | 1.195552  |
| F  | -7.127445 | -1.922859 | 2.074454  |
| F  | -7.305247 | -1.429349 | -0.018113 |
| F  | -7.858297 | 0.016243  | 1.485334  |
| O  | -5.002249 | -0.190577 | 2.284658  |
| H  | -0.726686 | -0.552678 | -1.473022 |
| H  | 0.292331  | 2.866987  | -0.074905 |
| H  | 0.697652  | 1.990973  | -4.233620 |
| H  | -0.395439 | 0.955864  | -3.302125 |
| H  | 1.378898  | 0.759240  | -3.170099 |
| H  | -0.491790 | 4.391214  | -1.680381 |
| H  | -1.471695 | 3.178214  | -2.541059 |
| H  | -0.231605 | 4.103278  | -3.414340 |
| H  | 2.187813  | 3.693335  | -3.076953 |
| H  | 2.779012  | 2.471817  | -1.929011 |
| H  | 2.037634  | 3.973599  | -1.327306 |
| H  | 1.295986  | -0.545573 | -1.547389 |
| H  | 4.377434  | -1.816957 | 2.313878  |
| H  | 1.780261  | 2.494641  | 1.479634  |
| H  | -1.850392 | 3.151980  | 0.434205  |
| H  | -5.519736 | -0.503697 | -0.808107 |
| Cl | 3.877132  | 1.413813  | 3.007219  |
| Cl | -4.568178 | 2.715619  | 0.946195  |

11-conf25

- Electronic Energy (Eh): -7737.92974334

- Cartesian Coordinates:

|    |           |           |           |
|----|-----------|-----------|-----------|
| Br | 3.362300  | -1.395305 | 2.167134  |
| C  | 2.796626  | 0.014204  | 1.042387  |
| C  | 1.511774  | 0.521260  | 1.202425  |
| C  | 1.045796  | 1.553201  | 0.380882  |
| C  | -0.355677 | 2.141877  | 0.462313  |
| C  | -0.748046 | 2.804239  | 1.836324  |
| C  | -0.960913 | 1.806611  | 2.982447  |
| C  | 0.362598  | 3.791064  | 2.222378  |
| C  | -2.057041 | 3.584073  | 1.633910  |
| C  | -1.421386 | 1.206073  | -0.091718 |

|    |           |           |           |
|----|-----------|-----------|-----------|
| C  | -1.556887 | -0.122902 | 0.318136  |
| C  | -2.592162 | -0.913874 | -0.168695 |
| Br | -2.716676 | -2.702441 | 0.410459  |
| C  | -3.531152 | -0.411005 | -1.080401 |
| N  | -4.601638 | -1.200602 | -1.557915 |
| C  | -5.871305 | -1.283839 | -1.064866 |
| C  | -6.173211 | -0.451851 | 0.214202  |
| F  | -5.368928 | -0.803158 | 1.221189  |
| F  | -6.003010 | 0.855371  | -0.003765 |
| F  | -7.419997 | -0.650113 | 0.589935  |
| O  | -6.734499 | -1.959387 | -1.558551 |
| C  | -3.353178 | 0.907278  | -1.524513 |
| C  | -2.321730 | 1.701859  | -1.037962 |
| C  | 1.921007  | 2.067811  | -0.578863 |
| C  | 3.214176  | 1.574571  | -0.721178 |
| C  | 3.678445  | 0.520745  | 0.078558  |
| N  | 4.976561  | -0.002487 | -0.072080 |
| C  | 5.365655  | -0.677737 | -1.193040 |
| C  | 6.830585  | -1.173169 | -1.130906 |
| F  | 6.935033  | -2.370976 | -1.675258 |
| F  | 7.276719  | -1.246446 | 0.133973  |
| F  | 7.619459  | -0.331364 | -1.789860 |
| O  | 4.703055  | -0.860953 | -2.176979 |
| H  | 0.884572  | 0.089142  | 1.978551  |
| H  | -0.337834 | 2.994374  | -0.233079 |
| H  | -1.347135 | 2.342224  | 3.863009  |
| H  | -0.027282 | 1.320216  | 3.296697  |
| H  | -1.698577 | 1.031875  | 2.725762  |
| H  | 0.531043  | 4.535075  | 1.427326  |
| H  | 1.316996  | 3.277592  | 2.411564  |
| H  | 0.086992  | 4.335848  | 3.138105  |
| H  | -2.304129 | 4.147792  | 2.546027  |
| H  | -2.903970 | 2.916477  | 1.416080  |
| H  | -1.972960 | 4.308639  | 0.808107  |
| H  | -0.855942 | -0.567826 | 1.021123  |
| H  | -4.453708 | -1.767700 | -2.388703 |
| H  | -2.233260 | 2.726033  | -1.402593 |
| H  | 1.604472  | 2.883171  | -1.231094 |
| H  | 5.551425  | -0.091464 | 0.758624  |
| Cl | -4.434917 | 1.562123  | -2.709367 |
| Cl | 4.266223  | 2.313244  | -1.880860 |

11-conf26

- Electronic Energy (Eh): -7737.92968705

- Cartesian Coordinates:

|    |           |           |           |
|----|-----------|-----------|-----------|
| Br | 4.409308  | 2.187931  | -1.636607 |
| C  | 3.227234  | 1.382418  | -0.402701 |
| C  | 1.953114  | 1.916071  | -0.242530 |
| C  | 1.039400  | 1.343598  | 0.647480  |
| C  | -0.348735 | 1.960774  | 0.744663  |
| C  | -0.750451 | 2.534026  | 2.155542  |
| C  | -1.005203 | 1.463627  | 3.224646  |
| C  | 0.375557  | 3.464142  | 2.628111  |
| C  | -2.037760 | 3.356730  | 1.987190  |
| C  | -1.427107 | 1.096288  | 0.105982  |
| C  | -1.618145 | -0.249540 | 0.429840  |
| C  | -2.664901 | -0.973062 | -0.131946 |
| Br | -2.866376 | -2.787278 | 0.333544  |
| C  | -3.559883 | -0.383547 | -1.036156 |
| N  | -4.642242 | -1.104749 | -1.589128 |
| C  | -5.927553 | -1.172862 | -1.135979 |
| C  | -6.238409 | -0.407821 | 0.182180  |
| F  | -7.502096 | -0.582039 | 0.510404  |
| F  | -5.477501 | -0.847812 | 1.187851  |
| F  | -6.016186 | 0.903053  | 0.048703  |
| O  | -6.797983 | -1.788024 | -1.692022 |
| C  | -3.325439 | 0.951932  | -1.394022 |
| C  | -2.283029 | 1.679339  | -0.831740 |
| C  | 1.458106  | 0.234348  | 1.388234  |

|    |           |           |           |
|----|-----------|-----------|-----------|
| C  | 2.740995  | -0.283793 | 1.242557  |
| C  | 3.652678  | 0.267536  | 0.330541  |
| N  | 4.942475  | -0.271070 | 0.162955  |
| C  | 5.150965  | -1.507622 | -0.375983 |
| C  | 6.647694  | -1.887830 | -0.477436 |
| F  | 6.974749  | -2.700862 | 0.520530  |
| F  | 7.441908  | -0.807051 | -0.402151 |
| F  | 6.890372  | -2.498447 | -1.622638 |
| O  | 4.302651  | -2.286240 | -0.715273 |
| H  | 1.667014  | 2.787300  | -0.833955 |
| H  | -0.296123 | 2.860167  | 0.113016  |
| H  | -0.089973 | 0.927250  | 3.510325  |
| H  | -1.763032 | 0.732592  | 2.906204  |
| H  | -1.384837 | 1.946124  | 4.138164  |
| H  | 0.574918  | 4.258182  | 1.890599  |
| H  | 1.314281  | 2.915342  | 2.795496  |
| H  | 0.096618  | 3.949461  | 3.575704  |
| H  | -2.289586 | 3.859602  | 2.932983  |
| H  | -2.894875 | 2.726231  | 1.707406  |
| H  | -1.922268 | 4.136059  | 1.216874  |
| H  | -0.953887 | -0.760358 | 1.123554  |
| H  | -4.488455 | -1.630087 | -2.445881 |
| H  | -2.150850 | 2.720330  | -1.129480 |
| H  | 0.806385  | -0.245145 | 2.114715  |
| H  | 5.734209  | 0.359663  | 0.223787  |
| Cl | -4.349518 | 1.714690  | -2.565768 |
| Cl | 3.216747  | -1.611795 | 2.247777  |

-----  
11-conf27

- Electronic Energy (Eh): -7737.929544

- Cartesian Coordinates:

|    |           |           |           |
|----|-----------|-----------|-----------|
| Br | 3.743782  | -1.640103 | 1.768101  |
| C  | 2.997126  | -0.134058 | 0.918898  |
| C  | 1.685095  | 0.215850  | 1.225487  |
| C  | 1.093181  | 1.358735  | 0.678091  |
| C  | -0.337210 | 1.795449  | 0.961300  |
| C  | -0.670408 | 2.126374  | 2.464912  |
| C  | 0.387765  | 3.111954  | 2.980026  |
| C  | -2.047575 | 2.807306  | 2.510682  |
| C  | -0.712884 | 0.901395  | 3.387760  |
| C  | -1.372432 | 0.905298  | 0.287190  |
| C  | -2.373774 | 1.508298  | -0.480008 |
| C  | -3.384278 | 0.750414  | -1.061155 |
| Br | -4.695405 | 1.619676  | -2.097841 |
| C  | -3.435910 | -0.640459 | -0.894850 |
| N  | -4.473550 | -1.418633 | -1.456215 |
| C  | -5.648281 | -1.799702 | -0.875905 |
| C  | -5.905196 | -1.285389 | 0.569365  |
| F  | -5.879466 | 0.049370  | 0.623443  |
| F  | -7.086699 | -1.694408 | 0.983775  |
| F  | -4.980181 | -1.743458 | 1.417236  |
| O  | -6.466666 | -2.491386 | -1.420916 |
| C  | -2.397297 | -1.239655 | -0.166925 |
| C  | -1.385226 | -0.485164 | 0.416044  |
| C  | 1.862737  | 2.142388  | -0.186044 |
| C  | 3.164818  | 1.778622  | -0.507272 |
| C  | 3.763399  | 0.631349  | 0.029550  |
| N  | 5.082742  | 0.284338  | -0.320474 |
| C  | 5.367027  | -0.808035 | -1.088378 |
| C  | 6.879150  | -0.978292 | -1.370014 |
| F  | 7.401354  | -1.851296 | -0.515524 |
| F  | 7.542757  | 0.180959  | -1.227269 |
| F  | 7.073049  | -1.416131 | -2.599790 |
| O  | 4.577735  | -1.619460 | -1.487945 |
| H  | 1.142155  | -0.418806 | 1.921778  |
| H  | -0.433452 | 2.770739  | 0.461017  |
| H  | 0.144551  | 3.430660  | 4.004989  |
| H  | 0.434000  | 4.014982  | 2.350257  |
| H  | 1.391003  | 2.660758  | 2.998245  |

|    |           |           |           |
|----|-----------|-----------|-----------|
| H  | -2.855072 | 2.122920  | 2.210864  |
| H  | -2.085592 | 3.688817  | 1.850722  |
| H  | -2.264269 | 3.149260  | 3.533865  |
| H  | -1.070413 | 1.208377  | 4.382425  |
| H  | 0.278240  | 0.451162  | 3.536030  |
| H  | -1.404713 | 0.129344  | 3.019552  |
| H  | -2.376063 | 2.589976  | -0.621514 |
| H  | -4.351377 | -1.784341 | -2.396935 |
| H  | -0.609564 | -1.014163 | 0.965438  |
| H  | 1.446686  | 3.047038  | -0.631986 |
| H  | 5.796999  | 0.999283  | -0.236358 |
| Cl | -2.366121 | -2.963199 | 0.009072  |
| Cl | 4.081092  | 2.774632  | -1.599020 |

-----  
11-conf28

- Electronic Energy (Eh): -7737.929687509999

- Cartesian Coordinates:

|    |           |           |           |
|----|-----------|-----------|-----------|
| Br | 4.408980  | 2.187671  | -1.637132 |
| C  | 3.227025  | 1.382330  | -0.403014 |
| C  | 1.952925  | 1.916014  | -0.242784 |
| C  | 1.039323  | 1.343671  | 0.647415  |
| C  | -0.348794 | 1.960845  | 0.744743  |
| C  | -0.750397 | 2.533867  | 2.155727  |
| C  | -1.004766 | 1.463340  | 3.224817  |
| C  | 0.375499  | 3.464165  | 2.628208  |
| C  | -2.037916 | 3.356328  | 1.987675  |
| C  | -1.427164 | 1.096366  | 0.106044  |
| C  | -1.617990 | -0.249543 | 0.429662  |
| C  | -2.664770 | -0.973064 | -0.132102 |
| Br | -2.866060 | -2.787357 | 0.333148  |
| C  | -3.559894 | -0.383469 | -1.036096 |
| N  | -4.642261 | -1.104699 | -1.589081 |
| C  | -5.927489 | -1.173063 | -1.135777 |
| C  | -6.238437 | -0.407788 | 0.182229  |
| F  | -7.502122 | -0.582087 | 0.510468  |
| F  | -5.477479 | -0.847666 | 1.187923  |
| F  | -6.016332 | 0.903090  | 0.048686  |
| O  | -6.797782 | -1.788745 | -1.691463 |
| C  | -3.325609 | 0.952081  | -1.393836 |
| C  | -2.283233 | 1.679492  | -0.831504 |
| C  | 1.458075  | 0.234494  | 1.388256  |
| C  | 2.740943  | -0.283675 | 1.242537  |
| C  | 3.652528  | 0.267553  | 0.330345  |
| N  | 4.942367  | -0.270988 | 0.162756  |
| C  | 5.151025  | -1.507510 | -0.376155 |
| C  | 6.647826  | -1.887575 | -0.477034 |
| F  | 6.890815  | -2.499351 | -1.621544 |
| F  | 6.974881  | -2.699518 | 0.521864  |
| F  | 7.441789  | -0.806568 | -0.402714 |
| O  | 4.302840  | -2.286116 | -0.715795 |
| H  | 1.666727  | 2.787122  | -0.834343 |
| H  | -0.296258 | 2.860333  | 0.113218  |
| H  | -0.089373 | 0.927198  | 3.510423  |
| H  | -1.762428 | 0.732109  | 2.906416  |
| H  | -1.384467 | 1.945730  | 4.138363  |
| H  | 0.574517  | 4.258380  | 1.890787  |
| H  | 1.314392  | 2.915550  | 2.795280  |
| H  | 0.096653  | 3.949235  | 3.575954  |
| H  | -2.289592 | 3.859174  | 2.933522  |
| H  | -2.894982 | 2.725661  | 1.708115  |
| H  | -1.922787 | 4.135660  | 1.217303  |
| H  | -0.953512 | -0.760408 | 1.123142  |
| H  | -4.488171 | -1.630913 | -2.445243 |
| H  | -2.151162 | 2.720541  | -1.129096 |
| H  | 0.806330  | -0.244920 | 2.114772  |
| H  | 5.734055  | 0.359794  | 0.223801  |
| Cl | -4.349736 | 1.714864  | -2.565491 |
| Cl | 3.216821  | -1.611500 | 2.247907  |



11-conf29

- Electronic Energy (Eh): -7737.92972468

- Cartesian Coordinates:

|    |           |           |           |
|----|-----------|-----------|-----------|
| Br | 3.626276  | -2.178484 | 1.478580  |
| C  | 2.948855  | -0.485535 | 0.982331  |
| C  | 1.651322  | -0.150165 | 1.353268  |
| C  | 1.104216  | 1.085752  | 0.992486  |
| C  | -0.317421 | 1.517915  | 1.323256  |
| C  | -0.680245 | 1.587400  | 2.854291  |
| C  | -0.805471 | 0.219552  | 3.538104  |
| C  | 0.403734  | 2.411807  | 3.562656  |
| C  | -2.027268 | 2.314654  | 2.993474  |
| C  | -1.361628 | 0.800244  | 0.478906  |
| C  | -2.326249 | 1.563864  | -0.185054 |
| C  | -3.341547 | 0.956285  | -0.915528 |
| Br | -4.601326 | 2.040122  | -1.802659 |
| C  | -3.434489 | -0.439352 | -1.007986 |
| N  | -4.477135 | -1.069545 | -1.724335 |
| C  | -5.675060 | -1.517327 | -1.248357 |
| C  | -5.956027 | -1.270946 | 0.261494  |
| F  | -5.064667 | -1.904030 | 1.029142  |
| F  | -5.898516 | 0.029605  | 0.561573  |
| F  | -7.157504 | -1.714733 | 0.568881  |
| O  | -6.496250 | -2.072607 | -1.928464 |
| C  | -2.431419 | -1.193072 | -0.380711 |
| C  | -1.415412 | -0.589348 | 0.351484  |
| C  | 1.911918  | 1.972357  | 0.275948  |
| C  | 3.217662  | 1.643295  | -0.073999 |
| C  | 3.763120  | 0.395256  | 0.258388  |
| N  | 5.074296  | 0.042384  | -0.113260 |
| C  | 5.435868  | -0.147875 | -1.415635 |
| C  | 6.922378  | -0.542714 | -1.587249 |
| F  | 7.048047  | -1.465907 | -2.522407 |
| F  | 7.443005  | -1.026588 | -0.447380 |
| F  | 7.634360  | 0.522775  | -1.937021 |
| O  | 4.732694  | 0.003105  | -2.376734 |
| H  | 1.078133  | -0.876896 | 1.924073  |
| H  | -0.367869 | 2.569517  | 1.003577  |
| H  | 0.159157  | -0.299339 | 3.623249  |
| H  | -1.520272 | -0.437850 | 3.021253  |
| H  | -1.177781 | 0.359319  | 4.564393  |
| H  | 0.509098  | 3.409588  | 3.107283  |
| H  | 1.385302  | 1.916729  | 3.521001  |
| H  | 0.143371  | 2.552986  | 4.622649  |
| H  | -2.259729 | 2.475619  | 4.056888  |
| H  | -2.854581 | 1.735792  | 2.556614  |
| H  | -2.006668 | 3.301937  | 2.504798  |
| H  | -2.295094 | 2.652765  | -0.127052 |
| H  | -4.342092 | -1.255217 | -2.714777 |
| H  | -0.668542 | -1.232947 | 0.811327  |
| H  | 1.530699  | 2.952880  | -0.013308 |
| H  | 5.696917  | -0.305002 | 0.607833  |
| Cl | -2.449375 | -2.920227 | -0.523840 |
| Cl | 4.183579  | 2.820612  | -0.897735 |

11-conf30

- Electronic Energy (Eh): -7737.92967248

- Cartesian Coordinates:

|    |           |          |           |
|----|-----------|----------|-----------|
| Br | 4.325463  | 2.395977 | -1.289179 |
| C  | 3.235806  | 1.344330 | -0.159788 |
| C  | 1.944880  | 1.776222 | 0.124416  |
| C  | 1.097438  | 1.022876 | 0.942258  |
| C  | -0.314126 | 1.540213 | 1.180907  |
| C  | -0.689954 | 1.852250 | 2.678419  |
| C  | -0.864373 | 0.608065 | 3.558975  |
| C  | 0.411944  | 2.742474 | 3.269784  |
| C  | -2.014882 | 2.631371 | 2.685739  |
| C  | -1.371917 | 0.733489 | 0.440428  |

|    |           |           |           |
|----|-----------|-----------|-----------|
| C  | -2.302897 | 1.415775  | -0.348446 |
| C  | -3.330351 | 0.735322  | -0.992507 |
| Br | -4.543225 | 1.708940  | -2.055660 |
| C  | -3.469612 | -0.654076 | -0.870020 |
| N  | -4.525275 | -1.353930 | -1.497111 |
| C  | -5.743563 | -1.682659 | -0.977770 |
| C  | -6.034365 | -1.193111 | 0.469685  |
| F  | -7.251364 | -1.551021 | 0.824323  |
| F  | -5.170216 | -1.719325 | 1.341932  |
| F  | -5.943589 | 0.136740  | 0.560835  |
| O  | -6.575246 | -2.310738 | -1.577001 |
| C  | -2.499857 | -1.333559 | -0.117815 |
| C  | -1.471575 | -0.656627 | 0.528349  |
| C  | 1.599788  | -0.163777 | 1.484505  |
| C  | 2.899425  | -0.581984 | 1.217080  |
| C  | 3.744871  | 0.153619  | 0.373818  |
| N  | 5.051420  | -0.280898 | 0.080772  |
| C  | 5.297555  | -1.406346 | -0.651507 |
| C  | 6.805643  | -1.683316 | -0.861537 |
| F  | 7.218727  | -2.605261 | 0.000953  |
| F  | 7.545912  | -0.579555 | -0.666495 |
| F  | 7.027276  | -2.116717 | -2.088586 |
| O  | 4.474699  | -2.169321 | -1.077791 |
| H  | 1.592590  | 2.712034  | -0.312374 |
| H  | -0.329286 | 2.532184  | 0.705031  |
| H  | -1.235157 | 0.913157  | 4.549371  |
| H  | 0.081452  | 0.075702  | 3.728861  |
| H  | -1.599636 | -0.095167 | 3.140604  |
| H  | 0.554904  | 3.654920  | 2.668787  |
| H  | 1.377318  | 2.217384  | 3.321126  |
| H  | 0.143800  | 3.052708  | 4.291119  |
| H  | -2.254229 | 2.956990  | 3.709202  |
| H  | -2.854846 | 2.017867  | 2.327420  |
| H  | -1.957874 | 3.532983  | 2.054955  |
| H  | -2.235889 | 2.499094  | -0.457888 |
| H  | -4.383748 | -1.699931 | -2.442566 |
| H  | -0.752592 | -1.244683 | 1.094654  |
| H  | 1.001866  | -0.785645 | 2.146491  |
| H  | 5.811742  | 0.377582  | 0.209748  |
| Cl | -2.576832 | -3.059984 | 0.008261  |
| Cl | 3.480515  | -2.021903 | 1.984741  |

11-conf31

- Electronic Energy (Eh): -7737.929671980001

- Cartesian Coordinates:

|    |           |           |           |
|----|-----------|-----------|-----------|
| Br | -4.325760 | -2.396078 | -1.289049 |
| C  | -3.235916 | -1.344438 | -0.159817 |
| C  | -1.945020 | -1.776426 | 0.124338  |
| C  | -1.097456 | -1.023059 | 0.942040  |
| C  | 0.314107  | -1.540405 | 1.180613  |
| C  | 0.689960  | -1.852640 | 2.678055  |
| C  | 0.863532  | -0.608579 | 3.558980  |
| C  | -0.411540 | -2.743605 | 3.269068  |
| C  | 2.015306  | -2.631040 | 2.685355  |
| C  | 1.371884  | -0.733490 | 0.440280  |
| C  | 2.302905  | -1.415644 | -0.348682 |
| C  | 3.330388  | -0.735108 | -0.992597 |
| Br | 4.543252  | -1.708567 | -2.055928 |
| C  | 3.469665  | 0.654280  | -0.869897 |
| N  | 4.525355  | 1.354210  | -1.496819 |
| C  | 5.743707  | 1.682686  | -0.977467 |
| C  | 6.034445  | 1.192838  | 0.469883  |
| F  | 7.251435  | 1.550666  | 0.824664  |
| F  | 5.170216  | 1.718900  | 1.342140  |
| F  | 5.943643  | -0.137037 | 0.560745  |
| O  | 6.575394  | 2.310850  | -1.576582 |
| C  | 2.499856  | 1.333625  | -0.117662 |
| C  | 1.471521  | 0.656618  | 0.528348  |
| C  | -1.599662 | 0.163674  | 1.484239  |

|    |           |           |           |
|----|-----------|-----------|-----------|
| C  | -2.899296 | 0.581949  | 1.216884  |
| C  | -3.744856 | -0.153629 | 0.373709  |
| N  | -5.051361 | 0.280942  | 0.080652  |
| C  | -5.297550 | 1.406601  | -0.651248 |
| C  | -6.805616 | 1.683533  | -0.861361 |
| F  | -7.218545 | 2.606129  | 0.000519  |
| F  | -7.545979 | 0.579983  | -0.665496 |
| F  | -7.027264 | 2.116084  | -2.088710 |
| O  | -4.474751 | 2.169757  | -1.077331 |
| H  | -1.592839 | -2.712315 | -0.312377 |
| H  | 0.329352  | -2.532295 | 0.704555  |
| H  | 1.234921  | -0.913644 | 4.549156  |
| H  | -0.082751 | -0.077176 | 3.729310  |
| H  | 1.598048  | 0.095455  | 3.140638  |
| H  | -0.553607 | -3.656207 | 2.668097  |
| H  | -0.143563 | -3.053560 | 4.290533  |
| H  | -1.377299 | -2.219186 | 3.320017  |
| H  | 2.254585  | -2.956915 | 3.708752  |
| H  | 2.855025  | -2.016961 | 2.327441  |
| H  | 1.958950  | -3.532453 | 2.054228  |
| H  | 2.235907  | -2.498943 | -0.458324 |
| H  | 4.383704  | 1.700701  | -2.442079 |
| H  | 0.752483  | 1.244659  | 1.094593  |
| H  | -1.001605 | 0.785541  | 2.146101  |
| H  | -5.811777 | -0.377411 | 0.209742  |
| Cl | 2.576800  | 3.060057  | 0.008644  |
| Cl | -3.480244 | 2.021908  | 1.984600  |

-----  
11-conf32

- Electronic Energy (Eh): -7737.9288794

- Cartesian Coordinates:

|    |           |           |           |
|----|-----------|-----------|-----------|
| Br | 2.221120  | -1.009787 | 2.319023  |
| C  | 2.142907  | 0.243390  | 0.907150  |
| C  | 0.971782  | 0.966325  | 0.716526  |
| C  | 0.873474  | 1.891461  | -0.325937 |
| C  | -0.392048 | 2.705631  | -0.564814 |
| C  | -0.461933 | 4.031415  | 0.280462  |
| C  | -1.830900 | 4.690916  | 0.059930  |
| C  | -0.206923 | 3.839604  | 1.782651  |
| C  | 0.624485  | 4.980858  | -0.253076 |
| C  | -1.613692 | 1.795452  | -0.556588 |
| C  | -2.305248 | 1.421980  | 0.599371  |
| C  | -3.371269 | 0.530423  | 0.534639  |
| Br | -4.286249 | 0.097992  | 2.124422  |
| C  | -3.781717 | -0.034792 | -0.680509 |
| N  | -4.857156 | -0.948973 | -0.750583 |
| C  | -4.815863 | -2.312710 | -0.699389 |
| C  | -3.414577 | -2.955696 | -0.499051 |
| F  | -3.531100 | -4.266210 | -0.437469 |
| F  | -2.596308 | -2.651187 | -1.508497 |
| F  | -2.844389 | -2.529676 | 0.631337  |
| O  | -5.790474 | -3.009848 | -0.795817 |
| C  | -3.100120 | 0.369964  | -1.837984 |
| C  | -2.036305 | 1.262955  | -1.777423 |
| C  | 1.978990  | 2.073806  | -1.157787 |
| C  | 3.159113  | 1.365902  | -0.948554 |
| C  | 3.262923  | 0.420629  | 0.081601  |
| N  | 4.441648  | -0.322460 | 0.281858  |
| C  | 4.887147  | -1.243719 | -0.622038 |
| C  | 6.191025  | -1.951476 | -0.181238 |
| F  | 6.380203  | -1.863361 | 1.145788  |
| F  | 7.235034  | -1.384735 | -0.776756 |
| F  | 6.154876  | -3.229395 | -0.508812 |
| O  | 4.391448  | -1.491751 | -1.686634 |
| H  | 0.126484  | 0.780864  | 1.378772  |
| H  | -0.320663 | 3.061594  | -1.603750 |
| H  | -1.848552 | 5.691005  | 0.519190  |
| H  | -2.650648 | 4.106672  | 0.501182  |
| H  | -2.045245 | 4.810854  | -1.014028 |

|    |           |           |           |
|----|-----------|-----------|-----------|
| H  | 0.776966  | 3.386988  | 1.973806  |
| H  | -0.967486 | 3.223198  | 2.280239  |
| H  | -0.221060 | 4.820374  | 2.282071  |
| H  | 0.579239  | 5.944162  | 0.276896  |
| H  | 0.489761  | 5.184881  | -1.327278 |
| H  | 1.634529  | 4.570343  | -0.106247 |
| H  | -2.030476 | 1.823515  | 1.571758  |
| H  | -5.795515 | -0.581634 | -0.884959 |
| H  | -1.529711 | 1.536455  | -2.704296 |
| H  | 1.939599  | 2.787676  | -1.981780 |
| H  | 4.826634  | -0.356070 | 1.219465  |
| Cl | -3.600592 | -0.241908 | -3.379233 |
| Cl | 4.522008  | 1.700845  | -1.963055 |

-----  
11-conf33

- Electronic Energy (Eh): -7737.9288752600005

- Cartesian Coordinates:

|    |           |           |           |
|----|-----------|-----------|-----------|
| Br | 3.277965  | 0.299567  | 2.524924  |
| C  | 2.624045  | 0.757516  | 0.811876  |
| C  | 1.421110  | 1.448663  | 0.719472  |
| C  | 0.892389  | 1.794721  | -0.528544 |
| C  | -0.430647 | 2.523352  | -0.722112 |
| C  | -0.523302 | 3.959292  | -0.083383 |
| C  | 0.709661  | 4.758829  | -0.527564 |
| C  | -1.783050 | 4.645609  | -0.634404 |
| C  | -0.606392 | 3.966862  | 1.448535  |
| C  | -1.635294 | 1.634909  | -0.438393 |
| C  | -1.789896 | 0.915046  | 0.749436  |
| C  | -2.919536 | 0.132330  | 0.964504  |
| Br | -3.090448 | -0.780678 | 2.603825  |
| C  | -3.931096 | 0.024015  | -0.000760 |
| N  | -5.080583 | -0.770539 | 0.211377  |
| C  | -5.295388 | -2.070378 | -0.147115 |
| C  | -4.111708 | -2.802602 | -0.839377 |
| F  | -3.784930 | -2.208943 | -1.990001 |
| F  | -3.027554 | -2.809584 | -0.060983 |
| F  | -4.449064 | -4.049779 | -1.095973 |
| O  | -6.329384 | -2.650424 | 0.052309  |
| C  | -3.773280 | 0.765010  | -1.181079 |
| C  | -2.644850 | 1.547217  | -1.400169 |
| C  | 1.624177  | 1.445111  | -1.665939 |
| C  | 2.839566  | 0.774468  | -1.569810 |
| C  | 3.362009  | 0.399016  | -0.324062 |
| N  | 4.579157  | -0.299332 | -0.214646 |
| C  | 4.731940  | -1.577867 | -0.669406 |
| C  | 6.150343  | -2.147574 | -0.426383 |
| F  | 6.871796  | -2.050154 | -1.537706 |
| F  | 6.082100  | -3.416927 | -0.071503 |
| F  | 6.796766  | -1.475552 | 0.540811  |
| O  | 3.905987  | -2.229423 | -1.246864 |
| H  | 0.907364  | 1.704820  | 1.642996  |
| H  | -0.477820 | 2.724739  | -1.802708 |
| H  | 0.638848  | 5.797786  | -0.171299 |
| H  | 0.794852  | 4.785704  | -1.625741 |
| H  | 1.640155  | 4.329230  | -0.127894 |
| H  | -2.703054 | 4.144246  | -0.298963 |
| H  | -1.786000 | 4.661091  | -1.736068 |
| H  | -1.826980 | 5.688986  | -0.287478 |
| H  | -0.779882 | 4.995994  | 1.798404  |
| H  | 0.324944  | 3.627642  | 1.922415  |
| H  | -1.439572 | 3.352634  | 1.821008  |
| H  | -1.029241 | 0.943535  | 1.526584  |
| H  | -5.884918 | -0.342872 | 0.662649  |
| H  | -2.564018 | 2.097360  | -2.338573 |
| H  | 1.256354  | 1.707464  | -2.659060 |
| H  | 5.276114  | 0.060409  | 0.428192  |
| Cl | -5.014147 | 0.720593  | -2.389836 |
| Cl | 3.727091  | 0.445592  | -3.019287 |

11-conf34

- Electronic Energy (Eh): -7737.92880674

- Cartesian Coordinates:

|    |           |           |           |
|----|-----------|-----------|-----------|
| Br | 4.524029  | 1.472300  | -1.940534 |
| C  | 3.130058  | 1.155318  | -0.705081 |
| C  | 1.962538  | 1.903956  | -0.800368 |
| C  | 0.902964  | 1.693822  | 0.086780  |
| C  | -0.348730 | 2.551164  | -0.052890 |
| C  | -0.387484 | 3.798855  | 0.906546  |
| C  | -0.353948 | 3.449657  | 2.400134  |
| C  | 0.834326  | 4.677005  | 0.593674  |
| C  | -1.661707 | 4.598445  | 0.600390  |
| C  | -1.621741 | 1.718085  | -0.109843 |
| C  | -2.176697 | 1.064171  | 0.995477  |
| C  | -3.332297 | 0.300920  | 0.865509  |
| Br | -4.047660 | -0.524825 | 2.400606  |
| C  | -3.976736 | 0.149253  | -0.370508 |
| N  | -5.149782 | -0.626671 | -0.508403 |
| C  | -5.262882 | -1.941001 | -0.861161 |
| C  | -3.933083 | -2.710306 | -1.098400 |
| F  | -4.192911 | -3.966733 | -1.395921 |
| F  | -3.239283 | -2.172915 | -2.104611 |
| F  | -3.160905 | -2.684424 | -0.009869 |
| O  | -6.317011 | -2.505734 | -0.983952 |
| C  | -3.428386 | 0.831621  | -1.465972 |
| C  | -2.272359 | 1.594337  | -1.340039 |
| C  | 1.055042  | 0.716599  | 1.072384  |
| C  | 2.233071  | -0.015991 | 1.179062  |
| C  | 3.295595  | 0.176850  | 0.283887  |
| N  | 4.481371  | -0.576471 | 0.374989  |
| C  | 4.515552  | -1.918209 | 0.124510  |
| C  | 5.928767  | -2.532698 | 0.268527  |
| F  | 6.039798  | -3.136962 | 1.446184  |
| F  | 6.888980  | -1.595687 | 0.197465  |
| F  | 6.145265  | -3.417238 | -0.687273 |
| O  | 3.574995  | -2.614972 | -0.140394 |
| H  | 1.877947  | 2.656473  | -1.585754 |
| H  | -0.270828 | 3.003944  | -1.052695 |
| H  | -0.263259 | 4.375418  | 2.988618  |
| H  | 0.507525  | 2.815363  | 2.656491  |
| H  | -1.273745 | 2.952867  | 2.737845  |
| H  | 0.870391  | 4.954785  | -0.471948 |
| H  | 1.777980  | 4.170645  | 0.845363  |
| H  | 0.789612  | 5.608182  | 1.178323  |
| H  | -1.679607 | 5.527540  | 1.190139  |
| H  | -2.570159 | 4.028338  | 0.845013  |
| H  | -1.713683 | 4.876014  | -0.464664 |
| H  | -1.724802 | 1.141750  | 1.981365  |
| H  | -6.047820 | -0.173127 | -0.362402 |
| H  | -1.880903 | 2.098084  | -2.224975 |
| H  | 0.262622  | 0.501750  | 1.786336  |
| H  | 5.362064  | -0.074000 | 0.386734  |
| Cl | -4.212587 | 0.739779  | -3.008090 |
| Cl | 2.387827  | -1.154103 | 2.475317  |

-----  
11-conf35

- Electronic Energy (Eh): -7737.92881993

- Cartesian Coordinates:

|    |           |           |           |
|----|-----------|-----------|-----------|
| Br | 2.491346  | -1.018637 | 2.374792  |
| C  | 2.251266  | 0.237051  | 0.983510  |
| C  | 1.069465  | 0.966138  | 0.934506  |
| C  | 0.852428  | 1.894168  | -0.087250 |
| C  | -0.427017 | 2.716887  | -0.174328 |
| C  | -0.395179 | 4.035040  | 0.684736  |
| C  | 0.007490  | 3.826682  | 2.151706  |
| C  | 0.640815  | 4.978992  | 0.051075  |
| C  | -1.773491 | 4.707439  | 0.610766  |
| C  | -1.648812 | 1.817267  | -0.038258 |

|    |           |           |           |
|----|-----------|-----------|-----------|
| C  | -2.232531 | 1.330796  | -1.212018 |
| C  | -3.308671 | 0.450692  | -1.168175 |
| Br | -4.067336 | -0.144171 | -2.785894 |
| C  | -3.841833 | 0.014353  | 0.052949  |
| N  | -4.929584 | -0.885861 | 0.112170  |
| C  | -4.899265 | -2.246539 | 0.220639  |
| C  | -3.492770 | -2.909128 | 0.227755  |
| F  | -2.812444 | -2.608459 | -0.880328 |
| F  | -2.770864 | -2.498427 | 1.274023  |
| F  | -3.618220 | -4.218408 | 0.298190  |
| O  | -5.886596 | -2.927689 | 0.300446  |
| C  | -3.271346 | 0.535368  | 1.223284  |
| C  | -2.193033 | 1.412521  | 1.183400  |
| C  | 1.852218  | 2.072332  | -1.044420 |
| C  | 3.044934  | 1.357766  | -0.978636 |
| C  | 3.266036  | 0.410318  | 0.030851  |
| N  | 4.457072  | -0.337556 | 0.090098  |
| C  | 4.792035  | -1.257261 | -0.861914 |
| C  | 6.136450  | -1.968810 | -0.576518 |
| F  | 7.105917  | -1.402414 | -1.287214 |
| F  | 6.060012  | -3.245804 | -0.900814 |
| F  | 6.477681  | -1.884433 | 0.720036  |
| O  | 4.175839  | -1.501178 | -1.862564 |
| H  | 0.308915  | 0.783138  | 1.692921  |
| H  | -0.469159 | 3.083183  | -1.211174 |
| H  | 0.053792  | 4.802741  | 2.658364  |
| H  | 1.000705  | 3.362945  | 2.240214  |
| H  | -0.707466 | 3.213692  | 2.716446  |
| H  | 0.399151  | 5.194551  | -1.001937 |
| H  | 1.656033  | 4.556849  | 0.089934  |
| H  | 0.660248  | 5.937588  | 0.591070  |
| H  | -1.736786 | 5.701707  | 1.081390  |
| H  | -2.548876 | 4.122484  | 1.125507  |
| H  | -2.094007 | 4.842213  | -0.434605 |
| H  | -1.839192 | 1.635988  | -2.183084 |
| H  | -5.872416 | -0.505706 | 0.104271  |
| H  | -1.798824 | 1.773579  | 2.130335  |
| H  | 1.719182  | 2.788632  | -1.856390 |
| H  | 4.946552  | -0.377964 | 0.977408  |
| Cl | -3.929750 | 0.089528  | 2.763873  |
| Cl | 4.278078  | 1.687330  | -2.149051 |

-----  
11-conf36

- Electronic Energy (Eh): -7737.92883402

- Cartesian Coordinates:

|    |           |           |           |
|----|-----------|-----------|-----------|
| Br | 3.540409  | 0.198062  | 2.539504  |
| C  | 2.772961  | 0.700455  | 0.887039  |
| C  | 1.544022  | 1.350818  | 0.892268  |
| C  | 0.932169  | 1.727390  | -0.307915 |
| C  | -0.419710 | 2.422665  | -0.394122 |
| C  | -0.491803 | 3.851729  | 0.262526  |
| C  | -0.427940 | 3.845892  | 1.794970  |
| C  | 0.672871  | 4.687302  | -0.287259 |
| C  | -1.815392 | 4.506441  | -0.162175 |
| C  | -1.581448 | 1.507403  | -0.029325 |
| C  | -2.644831 | 1.388366  | -0.929305 |
| C  | -3.741296 | 0.582244  | -0.642142 |
| Br | -5.159323 | 0.498125  | -1.879391 |
| C  | -3.812211 | -0.150664 | 0.550826  |
| N  | -4.920571 | -0.973296 | 0.854659  |
| C  | -5.080712 | -2.308331 | 0.617458  |
| C  | -3.917988 | -3.023777 | -0.125836 |
| F  | -2.786306 | -2.964256 | 0.579430  |
| F  | -4.224334 | -4.290651 | -0.316150 |
| F  | -3.688312 | -2.461695 | -1.315002 |
| O  | -6.057765 | -2.927090 | 0.945857  |
| C  | -2.748061 | -0.009753 | 1.454028  |
| C  | -1.649929 | 0.794677  | 1.169970  |
| C  | 1.607845  | 1.450059  | -1.498697 |

|    |           |           |           |
|----|-----------|-----------|-----------|
| C  | 2.849386  | 0.821891  | -1.500106 |
| C  | 3.455761  | 0.415532  | -0.302986 |
| N  | 4.700703  | -0.240796 | -0.292327 |
| C  | 4.873726  | -1.490285 | -0.815720 |
| C  | 6.323952  | -2.013500 | -0.679827 |
| F  | 6.324367  | -3.301870 | -0.394168 |
| F  | 6.995843  | -1.368466 | 0.288361  |
| F  | 6.979241  | -1.825864 | -1.820305 |
| O  | 4.040591  | -2.146212 | -1.377658 |
| H  | 1.076706  | 1.550809  | 1.853463  |
| H  | -0.553576 | 2.631346  | -1.465965 |
| H  | -0.582041 | 4.869270  | 2.169893  |
| H  | 0.549798  | 3.516003  | 2.172501  |
| H  | -1.212900 | 3.216159  | 2.239294  |
| H  | 0.654030  | 4.725119  | -1.388262 |
| H  | 1.647581  | 4.279775  | 0.019460  |
| H  | 0.608789  | 5.721217  | 0.084562  |
| H  | -1.854755 | 5.546034  | 0.196512  |
| H  | -2.686293 | 3.977542  | 0.252662  |
| H  | -1.921764 | 4.528547  | -1.258572 |
| H  | -2.624806 | 1.936305  | -1.872451 |
| H  | -5.711462 | -0.556124 | 1.338340  |
| H  | -0.852824 | 0.841390  | 1.908380  |
| H  | 1.174269  | 1.738604  | -2.457410 |
| H  | 5.418230  | 0.114432  | 0.330128  |
| Cl | -2.804329 | -0.842800 | 2.973002  |
| Cl | 3.662962  | 0.587386  | -3.010057 |

-----  
11-conf37

- Electronic Energy (Eh): -7737.92878476

- Cartesian Coordinates:

|    |           |           |           |
|----|-----------|-----------|-----------|
| Br | 3.696456  | 0.594581  | -2.794695 |
| C  | 2.788293  | 0.902228  | -1.166983 |
| C  | 1.595967  | 1.617564  | -1.185752 |
| C  | 0.881736  | 1.856280  | -0.008128 |
| C  | -0.437059 | 2.610659  | -0.111676 |
| C  | -0.564820 | 3.918273  | 0.756384  |
| C  | -0.779024 | 3.666537  | 2.255037  |
| C  | 0.705027  | 4.756738  | 0.553670  |
| C  | -1.770215 | 4.717539  | 0.235124  |
| C  | -1.638060 | 1.679039  | -0.009659 |
| C  | -1.780564 | 0.739451  | 1.014706  |
| C  | -2.904313 | -0.077998 | 1.076644  |
| Br | -3.062002 | -1.295751 | 2.505274  |
| C  | -3.920202 | -0.001035 | 0.112437  |
| N  | -5.064038 | -0.829435 | 0.169096  |
| C  | -5.276418 | -2.031379 | -0.442450 |
| C  | -4.094811 | -2.603693 | -1.274801 |
| F  | -4.428969 | -3.776105 | -1.774040 |
| F  | -3.778413 | -1.790405 | -2.286090 |
| F  | -3.005053 | -2.760139 | -0.520892 |
| O  | -6.306504 | -2.645481 | -0.357258 |
| C  | -3.773917 | 0.958662  | -0.899796 |
| C  | -2.650980 | 1.775982  | -0.966604 |
| C  | 1.418189  | 1.374016  | 1.189053  |
| C  | 2.624373  | 0.680940  | 1.208587  |
| C  | 3.331527  | 0.412114  | 0.027519  |
| N  | 4.540968  | -0.307415 | 0.040054  |
| C  | 4.604662  | -1.625638 | 0.391376  |
| C  | 6.037089  | -2.207343 | 0.319917  |
| F  | 6.828212  | -1.480383 | -0.486549 |
| F  | 6.009979  | -3.445544 | -0.135298 |
| F  | 6.584394  | -2.206331 | 1.530814  |
| O  | 3.690641  | -2.303903 | 0.771804  |
| H  | 1.213304  | 1.981855  | -2.140511 |
| H  | -0.456696 | 2.989331  | -1.144639 |
| H  | -0.963532 | 4.625902  | 2.762124  |
| H  | 0.098642  | 3.220246  | 2.741577  |
| H  | -1.651494 | 3.024132  | 2.444912  |

|    |           |           |           |
|----|-----------|-----------|-----------|
| H  | 0.886136  | 4.954734  | -0.514970 |
| H  | 1.596056  | 4.255007  | 0.958477  |
| H  | 0.605683  | 5.727538  | 1.062659  |
| H  | -1.839445 | 5.681941  | 0.760477  |
| H  | -2.717888 | 4.182809  | 0.397119  |
| H  | -1.678404 | 4.931410  | -0.841814 |
| H  | -1.012794 | 0.622567  | 1.777419  |
| H  | -5.865052 | -0.508011 | 0.706269  |
| H  | -2.577476 | 2.499831  | -1.779294 |
| H  | 0.924794  | 1.543750  | 2.143222  |
| H  | 5.331360  | 0.087853  | -0.457524 |
| Cl | -5.022724 | 1.145818  | -2.086853 |
| Cl | 3.270905  | 0.188866  | 2.738304  |

-----  
11-conf38

- Electronic Energy (Eh): -7737.92879574

- Cartesian Coordinates:

|    |           |           |           |
|----|-----------|-----------|-----------|
| Br | 3.666688  | 0.680870  | -2.787354 |
| C  | 2.821907  | 0.912930  | -1.113642 |
| C  | 1.598242  | 1.571569  | -1.062545 |
| C  | 0.928583  | 1.752356  | 0.151031  |
| C  | -0.424132 | 2.451039  | 0.125620  |
| C  | -0.536598 | 3.771333  | 0.975978  |
| C  | -1.825609 | 4.497185  | 0.558781  |
| C  | -0.588030 | 3.545117  | 2.492630  |
| C  | 0.664643  | 4.664237  | 0.634868  |
| C  | -1.581258 | 1.480935  | 0.326274  |
| C  | -2.643411 | 1.504684  | -0.582254 |
| C  | -3.731926 | 0.651491  | -0.433652 |
| Br | -5.151476 | 0.762968  | -1.667381 |
| C  | -3.794025 | -0.271098 | 0.619930  |
| N  | -4.893681 | -1.144481 | 0.780282  |
| C  | -5.040845 | -2.421702 | 0.320849  |
| C  | -3.874736 | -2.987874 | -0.537074 |
| F  | -3.664358 | -2.234989 | -1.620037 |
| F  | -2.737346 | -3.027500 | 0.159709  |
| F  | -4.165257 | -4.210911 | -0.930914 |
| O  | -6.009853 | -3.098027 | 0.542170  |
| C  | -2.730306 | -0.273281 | 1.535189  |
| C  | -1.640281 | 0.577663  | 1.389776  |
| C  | 1.541220  | 1.271518  | 1.311802  |
| C  | 2.777278  | 0.634983  | 1.261243  |
| C  | 3.441205  | 0.424150  | 0.043822  |
| N  | 4.680670  | -0.240022 | -0.014408 |
| C  | 4.817477  | -1.562014 | 0.299814  |
| C  | 6.268548  | -2.078186 | 0.147091  |
| F  | 6.871814  | -2.084194 | 1.331038  |
| F  | 6.989020  | -1.296728 | -0.674549 |
| F  | 6.272831  | -3.304313 | -0.340505 |
| O  | 3.952249  | -2.288878 | 0.703827  |
| H  | 1.155849  | 1.937128  | -1.990632 |
| H  | -0.530115 | 2.808032  | -0.909728 |
| H  | -1.891554 | 5.471332  | 1.066329  |
| H  | -2.724894 | 3.922141  | 0.825027  |
| H  | -1.850467 | 4.685373  | -0.526529 |
| H  | 0.357801  | 3.157222  | 2.894547  |
| H  | -1.401889 | 2.863507  | 2.780939  |
| H  | -0.773164 | 4.505398  | 2.997769  |
| H  | 0.570693  | 5.638138  | 1.138912  |
| H  | 0.728131  | 4.851956  | -0.449006 |
| H  | 1.614511  | 4.210887  | 0.954433  |
| H  | -2.628776 | 2.202285  | -1.420890 |
| H  | -5.684751 | -0.825871 | 1.333641  |
| H  | -0.839487 | 0.509180  | 2.123238  |
| H  | 1.084866  | 1.397377  | 2.290826  |
| H  | 5.430812  | 0.202012  | -0.534405 |
| Cl | -2.778086 | -1.349572 | 2.892271  |
| Cl | 3.514199  | 0.140270  | 2.748688  |

11-conf39

- Electronic Energy (Eh): -7737.92876548

- Cartesian Coordinates:

|    |           |           |           |
|----|-----------|-----------|-----------|
| Br | 3.620906  | 0.592906  | -2.816853 |
| C  | 2.799787  | 0.884573  | -1.140660 |
| C  | 1.577478  | 1.546103  | -1.095444 |
| C  | 0.925409  | 1.770059  | 0.120488  |
| C  | -0.429624 | 2.464136  | 0.088989  |
| C  | -0.550060 | 3.794795  | 0.922081  |
| C  | -0.627470 | 3.587321  | 2.440491  |
| C  | 0.657828  | 4.681479  | 0.588356  |
| C  | -1.830934 | 4.518808  | 0.476868  |
| C  | -1.579446 | 1.488937  | 0.306378  |
| C  | -2.652066 | 1.500960  | -0.589798 |
| C  | -3.732981 | 0.641276  | -0.423412 |
| Br | -5.167972 | 0.736710  | -1.640554 |
| C  | -3.776134 | -0.275948 | 0.635714  |
| N  | -4.867795 | -1.155977 | 0.813657  |
| C  | -5.011866 | -2.436318 | 0.362084  |
| C  | -3.852324 | -2.998925 | -0.507033 |
| F  | -2.705871 | -3.025716 | 0.175336  |
| F  | -4.138476 | -4.226516 | -0.889783 |
| F  | -3.661447 | -2.251160 | -1.597161 |
| O  | -5.973655 | -3.117981 | 0.598073  |
| C  | -2.701607 | -0.266272 | 1.538397  |
| C  | -1.619266 | 0.591131  | 1.375372  |
| C  | 1.554598  | 1.330391  | 1.288617  |
| C  | 2.789626  | 0.691485  | 1.243039  |
| C  | 3.435404  | 0.436300  | 0.024352  |
| N  | 4.673380  | -0.230870 | -0.028439 |
| C  | 4.814650  | -1.540316 | 0.333137  |
| C  | 6.263074  | -2.062771 | 0.176728  |
| F  | 6.887581  | -2.017484 | 1.348807  |
| F  | 6.967908  | -1.317380 | -0.690704 |
| F  | 6.259650  | -3.308762 | -0.257391 |
| O  | 3.955894  | -2.250582 | 0.778337  |
| H  | 1.121867  | 1.878959  | -2.029439 |
| H  | -0.539381 | 2.806158  | -0.951036 |
| H  | -0.814387 | 4.554929  | 2.930766  |
| H  | 0.308192  | 3.198074  | 2.864046  |
| H  | -1.450270 | 2.914316  | 2.723405  |
| H  | 0.740733  | 4.851437  | -0.497118 |
| H  | 1.601673  | 4.233326  | 0.931901  |
| H  | 0.555419  | 5.663455  | 1.074787  |
| H  | -1.904322 | 5.497199  | 0.975121  |
| H  | -2.735393 | 3.947187  | 0.732770  |
| H  | -1.836921 | 4.698004  | -0.610222 |
| H  | -2.651703 | 2.193727  | -1.432554 |
| H  | -5.654316 | -0.839961 | 1.374929  |
| H  | -0.808251 | 0.532483  | 2.098711  |
| H  | 1.112052  | 1.491679  | 2.268818  |
| H  | 5.413558  | 0.188810  | -0.580379 |
| Cl | -2.726058 | -1.336100 | 2.901077  |
| Cl | 3.548598  | 0.250809  | 2.736366  |

-----  
12-conf01

- Electronic Energy (Eh): -6935.47406035

- Cartesian Coordinates:

|    |           |           |           |
|----|-----------|-----------|-----------|
| C  | 0.539199  | 2.849682  | 2.212012  |
| C  | 0.133680  | 3.333636  | 0.814382  |
| C  | 0.067100  | 2.170510  | -0.248209 |
| C  | -1.198721 | 1.325060  | -0.268056 |
| C  | -1.748718 | 0.698910  | 0.855028  |
| C  | -2.889458 | -0.088855 | 0.753262  |
| Br | -3.564271 | -0.898220 | 2.332859  |
| C  | -3.536654 | -0.289599 | -0.477305 |
| N  | -4.684967 | -1.093155 | -0.529951 |
| C  | -5.441527 | -1.391198 | -1.616429 |

|    |           |           |           |
|----|-----------|-----------|-----------|
| C  | -6.642691 | -2.318865 | -1.298159 |
| F  | -7.774798 | -1.720992 | -1.637215 |
| F  | -6.714842 | -2.633013 | 0.004833  |
| F  | -6.533211 | -3.446799 | -1.984247 |
| O  | -5.280555 | -1.025681 | -2.754164 |
| C  | -2.990713 | 0.335942  | -1.604441 |
| C  | -1.849868 | 1.121131  | -1.488617 |
| C  | 1.320563  | 1.305880  | -0.280826 |
| C  | 2.353284  | 1.600547  | -1.174514 |
| C  | 3.525634  | 0.854015  | -1.223821 |
| C  | 3.705249  | -0.238573 | -0.367657 |
| N  | 4.863851  | -1.029545 | -0.371453 |
| C  | 5.967790  | -0.882819 | -1.146366 |
| C  | 7.062129  | -1.946897 | -0.873110 |
| F  | 6.701201  | -2.819305 | 0.080830  |
| F  | 7.309785  | -2.631339 | -1.979732 |
| F  | 8.178863  | -1.351994 | -0.480250 |
| O  | 6.176066  | -0.045021 | -1.988493 |
| C  | 2.662849  | -0.546425 | 0.524471  |
| Br | 2.823151  | -2.021159 | 1.709826  |
| C  | 1.496730  | 0.206748  | 0.564043  |
| C  | 1.192874  | 4.368739  | 0.359096  |
| C  | 0.830134  | 5.142388  | -0.909925 |
| C  | -0.544992 | 5.800427  | -0.795034 |
| C  | -1.618478 | 4.792568  | -0.384184 |
| C  | -1.227096 | 4.060156  | 0.899339  |
| H  | 1.525098  | 2.362695  | 2.204565  |
| H  | 0.601534  | 3.710174  | 2.895412  |
| H  | -0.184857 | 2.150783  | 2.652824  |
| H  | 0.057361  | 2.679373  | -1.220357 |
| H  | -1.302286 | 0.821612  | 1.839877  |
| H  | -4.979644 | -1.494215 | 0.355688  |
| H  | -3.474266 | 0.197322  | -2.568599 |
| H  | -1.451862 | 1.591371  | -2.391359 |
| H  | 2.244974  | 2.442014  | -1.862833 |
| H  | 4.314828  | 1.104778  | -1.928740 |
| H  | 4.867909  | -1.801340 | 0.289208  |
| H  | 0.715564  | -0.083861 | 1.265961  |
| H  | 1.311948  | 5.094960  | 1.181835  |
| H  | 2.173868  | 3.879781  | 0.247442  |
| H  | 0.844180  | 4.476134  | -1.790091 |
| H  | 1.602275  | 5.903105  | -1.104325 |
| H  | -0.496214 | 6.598321  | -0.032686 |
| H  | -0.816597 | 6.291433  | -1.742623 |
| H  | -1.787138 | 4.067656  | -1.199242 |
| H  | -2.582031 | 5.304214  | -0.235001 |
| H  | -1.154593 | 4.801302  | 1.714937  |
| H  | -2.019910 | 3.357511  | 1.197370  |

-----  
12-conf02

- Electronic Energy (Eh): -6935.47403924

- Cartesian Coordinates:

|    |          |           |           |
|----|----------|-----------|-----------|
| C  | 0.642419 | 2.613312  | -2.730004 |
| C  | 0.162813 | 3.177492  | -1.387275 |
| C  | 0.059582 | 2.081864  | -0.258242 |
| C  | 1.322434 | 1.244268  | -0.106686 |
| C  | 1.562144 | 0.101055  | -0.873923 |
| C  | 2.736105 | -0.626099 | -0.726132 |
| Br | 2.985904 | -2.164030 | -1.811278 |
| C  | 3.722469 | -0.246463 | 0.201409  |
| N  | 4.891873 | -1.012999 | 0.314842  |
| C  | 5.948143 | -0.800967 | 1.139361  |
| C  | 7.074431 | -1.855552 | 0.985328  |
| F  | 8.197099 | -1.261539 | 0.607872  |
| F  | 7.282305 | -2.464319 | 2.143067  |
| F  | 6.776080 | -2.793087 | 0.072517  |
| O  | 6.095178 | 0.086460  | 1.942739  |
| C  | 3.478708 | 0.890713  | 0.980048  |
| C  | 2.299279 | 1.610676  | 0.822628  |

|    |           |           |           |
|----|-----------|-----------|-----------|
| C  | -1.193720 | 1.216708  | -0.253215 |
| C  | -1.684528 | 0.499479  | -1.349511 |
| C  | -2.819788 | -0.298439 | -1.262148 |
| C  | -3.521603 | -0.414163 | -0.056180 |
| N  | -4.671315 | -1.204858 | 0.085680  |
| C  | -5.284811 | -1.957228 | -0.862395 |
| C  | -6.537502 | -2.708469 | -0.341860 |
| F  | -7.601811 | -2.346875 | -1.042351 |
| F  | -6.363823 | -4.015269 | -0.472831 |
| F  | -6.786908 | -2.452208 | 0.951753  |
| O  | -4.967512 | -2.096478 | -2.017487 |
| C  | -3.035689 | 0.303706  | 1.048871  |
| Br | -3.928185 | 0.209516  | 2.721096  |
| C  | -1.899883 | 1.097834  | 0.947935  |
| C  | -1.202428 | 3.873562  | -1.583018 |
| C  | -1.666152 | 4.679619  | -0.369554 |
| C  | -0.627820 | 5.729035  | 0.027324  |
| C  | 0.748461  | 5.102157  | 0.250733  |
| C  | 1.184067  | 4.256384  | -0.947348 |
| H  | -0.048156 | 1.872094  | -3.154646 |
| H  | 0.721880  | 3.428995  | -3.464710 |
| H  | 1.635380  | 2.148421  | -2.645222 |
| H  | -0.006557 | 2.651440  | 0.677310  |
| H  | 0.825465  | -0.244226 | -1.598748 |
| H  | 4.945846  | -1.821316 | -0.298320 |
| H  | 4.223808  | 1.197444  | 1.710330  |
| H  | 2.140106  | 2.489316  | 1.452141  |
| H  | -1.186432 | 0.556950  | -2.316321 |
| H  | -3.179564 | -0.843132 | -2.131924 |
| H  | -5.087733 | -1.208430 | 1.012337  |
| H  | -1.556782 | 1.636092  | 1.834029  |
| H  | -1.101251 | 4.562554  | -2.440173 |
| H  | -1.969296 | 3.139315  | -1.872594 |
| H  | -1.865113 | 4.005654  | 0.481715  |
| H  | -2.627987 | 5.164781  | -0.597608 |
| H  | -0.552039 | 6.477527  | -0.781493 |
| H  | -0.952415 | 6.274851  | 0.927087  |
| H  | 0.727407  | 4.492675  | 1.171055  |
| H  | 1.499820  | 5.886073  | 0.434109  |
| H  | 1.334272  | 4.931305  | -1.807791 |
| H  | 2.164676  | 3.791519  | -0.756973 |

-----  
12-conf03

- Electronic Energy (Eh): -6935.47380053

- Cartesian Coordinates:

|    |           |           |           |
|----|-----------|-----------|-----------|
| C  | 0.507183  | 2.246004  | -3.081098 |
| C  | 0.114344  | 2.863903  | -1.734112 |
| C  | 0.008863  | 1.800629  | -0.574407 |
| C  | 1.239490  | 0.912026  | -0.449417 |
| C  | 2.254101  | 1.273946  | 0.440703  |
| C  | 3.406713  | 0.507551  | 0.570573  |
| Br | 4.736340  | 1.077318  | 1.800141  |
| C  | 3.590677  | -0.663558 | -0.182382 |
| N  | 4.768019  | -1.408892 | -0.020385 |
| C  | 5.128948  | -2.545775 | -0.667357 |
| C  | 6.514954  | -3.090532 | -0.234865 |
| F  | 6.388366  | -4.323834 | 0.230507  |
| F  | 7.334624  | -3.108918 | -1.275851 |
| F  | 7.082698  | -2.342597 | 0.724331  |
| O  | 4.510676  | -3.147413 | -1.509846 |
| C  | 2.568366  | -1.035748 | -1.065379 |
| C  | 1.421581  | -0.260548 | -1.187842 |
| C  | -1.280832 | 0.994077  | -0.502033 |
| C  | -1.832916 | 0.257233  | -1.555391 |
| C  | -3.004194 | -0.477327 | -1.408742 |
| C  | -3.681553 | -0.506756 | -0.183562 |
| N  | -4.866122 | -1.230072 | 0.017758  |
| C  | -5.543930 | -1.983474 | -0.884684 |
| C  | -6.820443 | -2.645049 | -0.303789 |

|    |           |           |           |
|----|-----------|-----------|-----------|
| F  | -7.883207 | -2.248305 | -0.987583 |
| F  | -7.017536 | -2.330596 | 0.986108  |
| F  | -6.723384 | -3.963152 | -0.392240 |
| O  | -5.265980 | -2.182777 | -2.041020 |
| C  | -3.132879 | 0.229531  | 0.878955  |
| Br | -3.987343 | 0.249160  | 2.573541  |
| C  | -1.961702 | 0.960038  | 0.718921  |
| C  | -1.225149 | 3.617748  | -1.890115 |
| C  | -1.598943 | 4.475547  | -0.681160 |
| C  | -0.497087 | 5.483837  | -0.355253 |
| C  | 0.856747  | 4.797762  | -0.172058 |
| C  | 1.201479  | 3.904423  | -1.365240 |
| H  | -0.240909 | 1.536144  | -3.459312 |
| H  | 0.599975  | 3.040343  | -3.837360 |
| H  | 1.475828  | 1.728474  | -3.025867 |
| H  | 0.000660  | 2.395509  | 0.347563  |
| H  | 2.150440  | 2.173624  | 1.050253  |
| H  | 5.424629  | -1.044500 | 0.663667  |
| H  | 2.687737  | -1.943584 | -1.652125 |
| H  | 0.649400  | -0.596534 | -1.880253 |
| H  | -1.355210 | 0.248137  | -2.534001 |
| H  | -3.411773 | -1.038557 | -2.246343 |
| H  | -5.257152 | -1.176316 | 0.953936  |
| H  | -1.570840 | 1.516140  | 1.573661  |
| H  | -1.130756 | 4.278787  | -2.769750 |
| H  | -2.036008 | 2.912108  | -2.126227 |
| H  | -1.793436 | 3.833822  | 0.195586  |
| H  | -2.545724 | 5.000320  | -0.882917 |
| H  | -0.420489 | 6.207638  | -1.186131 |
| H  | -0.757646 | 6.066513  | 0.542211  |
| H  | 0.845395  | 4.212125  | 0.763898  |
| H  | 1.650817  | 5.549155  | -0.039362 |
| H  | 1.344142  | 4.551442  | -2.248070 |
| H  | 2.168202  | 3.400439  | -1.205630 |

-----  
12-conf04

- Electronic Energy (Eh): -6935.474060239999

- Cartesian Coordinates:

|    |           |           |           |
|----|-----------|-----------|-----------|
| C  | 0.538901  | 2.849255  | 2.212408  |
| C  | 0.133504  | 3.333424  | 0.814808  |
| C  | 0.067020  | 2.170423  | -0.247962 |
| C  | -1.198807 | 1.324992  | -0.267904 |
| C  | -1.748471 | 0.698246  | 0.855024  |
| C  | -2.889283 | -0.089401 | 0.753202  |
| Br | -3.563584 | -0.899633 | 2.332573  |
| C  | -3.536940 | -0.289394 | -0.477250 |
| N  | -4.685358 | -1.092798 | -0.529899 |
| C  | -5.442320 | -1.390114 | -1.616280 |
| C  | -6.643120 | -2.318326 | -1.298274 |
| F  | -6.716310 | -2.631201 | 0.004969  |
| F  | -7.775310 | -1.721766 | -1.639113 |
| F  | -6.532016 | -3.446951 | -1.983072 |
| O  | -5.281729 | -1.023851 | -2.753836 |
| C  | -2.991331 | 0.336731  | -1.604216 |
| C  | -1.850368 | 1.121749  | -1.488351 |
| C  | 1.320535  | 1.305876  | -0.280677 |
| C  | 2.353141  | 1.600608  | -1.174488 |
| C  | 3.525534  | 0.854162  | -1.223933 |
| C  | 3.705326  | -0.238426 | -0.367792 |
| N  | 4.863963  | -1.029337 | -0.371704 |
| C  | 5.967835  | -0.882568 | -1.146713 |
| C  | 7.062199  | -1.946663 | -0.873615 |
| F  | 6.701551  | -2.818838 | 0.080650  |
| F  | 8.179118  | -1.351768 | -0.481313 |
| F  | 7.309379  | -2.631384 | -1.980179 |
| O  | 6.176011  | -0.044791 | -1.988883 |
| C  | 2.663038  | -0.546350 | 0.524432  |
| Br | 2.823585  | -2.021083 | 1.709758  |
| C  | 1.496864  | 0.206738  | 0.564140  |

|   |           |           |           |
|---|-----------|-----------|-----------|
| C | 1.192743  | 4.368599  | 0.359778  |
| C | 0.830079  | 5.142495  | -0.909107 |
| C | -0.545027 | 5.800562  | -0.794143 |
| C | -1.618567 | 4.792636  | -0.383594 |
| C | -1.227286 | 4.059907  | 0.899779  |
| H | 1.524833  | 2.362332  | 2.204988  |
| H | 0.601112  | 3.709644  | 2.895951  |
| H | -0.185146 | 2.150239  | 2.653051  |
| H | 0.057266  | 2.679416  | -1.220045 |
| H | -1.301701 | 0.820397  | 1.839790  |
| H | -4.979936 | -1.494035 | 0.355694  |
| H | -3.475261 | 0.198722  | -2.568273 |
| H | -1.452613 | 1.592406  | -2.390988 |
| H | 2.244689  | 2.442066  | -1.862798 |
| H | 4.314621  | 1.104971  | -1.928954 |
| H | 4.868168  | -1.801077 | 0.289023  |
| H | 0.715791  | -0.083965 | 1.266123  |
| H | 1.311773  | 5.094658  | 1.182663  |
| H | 2.173734  | 3.879644  | 0.248096  |
| H | 0.844112  | 4.476393  | -1.789394 |
| H | 1.602257  | 5.903215  | -1.103360 |
| H | -0.496264 | 6.598279  | -0.031602 |
| H | -0.816557 | 6.291805  | -1.741631 |
| H | -1.787191 | 4.067935  | -1.198846 |
| H | -2.582118 | 5.304267  | -0.234347 |
| H | -1.154867 | 4.800866  | 1.715554  |
| H | -2.020116 | 3.357181  | 1.197587  |

-----  
12-conf05

- Electronic Energy (Eh): -6935.4738581

- Cartesian Coordinates:

|    |           |           |           |
|----|-----------|-----------|-----------|
| C  | -0.416716 | 2.477192  | 2.623358  |
| C  | -0.089846 | 3.042161  | 1.235760  |
| C  | -0.015053 | 1.931685  | 0.118454  |
| C  | -1.229108 | 1.012000  | 0.095111  |
| C  | -2.301287 | 1.317213  | -0.747428 |
| C  | -3.440477 | 0.521081  | -0.781786 |
| Br | -4.852222 | 1.014026  | -1.951287 |
| C  | -3.552473 | -0.624608 | 0.022689  |
| N  | -4.718548 | -1.401633 | -0.043748 |
| C  | -5.012196 | -2.523155 | 0.661211  |
| C  | -6.404485 | -3.117877 | 0.325887  |
| F  | -7.055895 | -2.402770 | -0.604695 |
| F  | -7.155105 | -3.147104 | 1.417099  |
| F  | -6.267346 | -4.353532 | -0.131062 |
| O  | -4.331215 | -3.079928 | 1.486120  |
| C  | -2.472596 | -0.940448 | 0.857689  |
| C  | -1.340094 | -0.135699 | 0.884829  |
| C  | 1.285705  | 1.148094  | 0.012156  |
| C  | 1.904765  | 1.042692  | -1.237156 |
| C  | 3.077238  | 0.322137  | -1.431449 |
| C  | 3.689535  | -0.335244 | -0.357943 |
| N  | 4.872480  | -1.077119 | -0.490038 |
| C  | 5.605334  | -1.279237 | -1.614112 |
| C  | 6.857989  | -2.164229 | -1.385496 |
| F  | 6.772665  | -3.261704 | -2.122707 |
| F  | 7.948449  | -1.498861 | -1.735044 |
| F  | 6.993938  | -2.537194 | -0.103363 |
| O  | 5.389297  | -0.861344 | -2.724425 |
| C  | 3.074751  | -0.233449 | 0.901247  |
| Br | 3.840302  | -1.092337 | 2.411752  |
| C  | 1.901541  | 0.489817  | 1.081442  |
| C  | 1.240554  | 3.824712  | 1.302998  |
| C  | 1.548487  | 4.632568  | 0.042264  |
| C  | 0.416531  | 5.608000  | -0.280393 |
| C  | -0.931823 | 4.893729  | -0.374679 |
| C  | -1.209765 | 4.048691  | 0.870007  |
| H  | 0.357560  | 1.796640  | 3.003314  |
| H  | -0.493439 | 3.302203  | 3.347870  |

|   |           |           |           |
|---|-----------|-----------|-----------|
| H | -1.377056 | 1.941630  | 2.629727  |
| H | -0.064447 | 2.484104  | -0.828361 |
| H | -2.253960 | 2.194606  | -1.395201 |
| H | -5.423532 | -1.076314 | -0.699011 |
| H | -2.536088 | -1.828135 | 1.482725  |
| H | -0.521579 | -0.428840 | 1.542817  |
| H | 1.455295  | 1.540978  | -2.099838 |
| H | 3.534382  | 0.259768  | -2.416217 |
| H | 5.215161  | -1.509836 | 0.362831  |
| H | 1.481314  | 0.535854  | 2.084186  |
| H | 1.169149  | 4.523139  | 2.155541  |
| H | 2.074068  | 3.145153  | 1.536508  |
| H | 1.717234  | 3.954547  | -0.812151 |
| H | 2.493574  | 5.180592  | 0.179932  |
| H | 0.362543  | 6.367362  | 0.519993  |
| H | 0.628824  | 6.153409  | -1.213251 |
| H | -0.950407 | 4.267647  | -1.283932 |
| H | -1.743699 | 5.626262  | -0.505074 |
| H | -1.325633 | 4.731620  | 1.729407  |
| H | -2.173654 | 3.523456  | 0.774850  |

-----  
12-conf06

- Electronic Energy (Eh): -6935.47380074

- Cartesian Coordinates:

|    |           |           |           |
|----|-----------|-----------|-----------|
| C  | 0.507040  | 2.245719  | -3.081237 |
| C  | 0.114221  | 2.863675  | -1.734265 |
| C  | 0.008858  | 1.800462  | -0.574519 |
| C  | 1.239550  | 0.911916  | -0.449526 |
| C  | 2.254035  | 1.273842  | 0.440768  |
| C  | 3.406729  | 0.507597  | 0.570623  |
| Br | 4.736185  | 1.077332  | 1.800410  |
| C  | 3.590936  | -0.663379 | -0.182508 |
| N  | 4.768387  | -1.408530 | -0.020527 |
| C  | 5.129560  | -2.545192 | -0.667713 |
| C  | 6.515233  | -3.090310 | -0.234656 |
| F  | 6.387499  | -4.322360 | 0.233890  |
| F  | 7.334300  | -3.112187 | -1.275966 |
| F  | 7.084248  | -2.340645 | 0.722449  |
| O  | 4.511479  | -3.146700 | -1.510442 |
| C  | 2.568753  | -1.035582 | -1.065627 |
| C  | 1.421860  | -0.260521 | -1.188080 |
| C  | -1.280790 | 0.993839  | -0.502044 |
| C  | -1.832670 | 0.256653  | -1.555268 |
| C  | -3.003903 | -0.477973 | -1.408568 |
| C  | -3.681427 | -0.507097 | -0.183475 |
| N  | -4.866000 | -1.230400 | 0.017885  |
| C  | -5.543649 | -1.984100 | -0.884425 |
| C  | -6.820562 | -2.645050 | -0.303687 |
| F  | -7.016416 | -2.332343 | 0.986819  |
| F  | -6.725252 | -3.963092 | -0.394303 |
| F  | -7.883303 | -2.245834 | -0.986160 |
| O  | -5.265450 | -2.183861 | -2.040623 |
| C  | -3.132958 | 0.229538  | 0.878912  |
| Br | -3.987668 | 0.249590  | 2.573377  |
| C  | -1.961817 | 0.960091  | 0.718831  |
| C  | -1.225330 | 3.617432  | -1.890278 |
| C  | -1.599137 | 4.475386  | -0.681431 |
| C  | -0.497291 | 5.483707  | -0.355598 |
| C  | 0.856542  | 4.797652  | -0.172357 |
| C  | 1.201304  | 3.904294  | -1.365497 |
| H  | -0.240912 | 1.535612  | -3.459265 |
| H  | 0.599567  | 3.039989  | -3.837597 |
| H  | 1.475810  | 1.728406  | -3.026057 |
| H  | 0.000689  | 2.395383  | 0.347428  |
| H  | 2.150162  | 2.173373  | 1.050495  |
| H  | 5.425095  | -1.043899 | 0.663302  |
| H  | 2.688321  | -1.943301 | -1.652518 |
| H  | 0.649812  | -0.596510 | -1.880636 |
| H  | -1.354804 | 0.247319  | -2.533798 |

|   |           |           |           |
|---|-----------|-----------|-----------|
| H | -3.411309 | -1.039497 | -2.246057 |
| H | -5.257016 | -1.176620 | 0.954065  |
| H | -1.571104 | 1.516455  | 1.573468  |
| H | -1.130990 | 4.278357  | -2.770003 |
| H | -2.036174 | 2.911732  | -2.126273 |
| H | -1.793662 | 3.833766  | 0.195381  |
| H | -2.545908 | 5.000143  | -0.883272 |
| H | -0.420694 | 6.207469  | -1.186513 |
| H | -0.757846 | 6.066428  | 0.541837  |
| H | 0.845178  | 4.211994  | 0.763586  |
| H | 1.650594  | 5.549060  | -0.039652 |
| H | 1.343895  | 4.551237  | -2.248393 |
| H | 2.168073  | 3.400390  | -1.205885 |

-----  
12-conf07

- Electronic Energy (Eh): -6935.47385916

- Cartesian Coordinates:

|    |           |           |           |
|----|-----------|-----------|-----------|
| C  | -0.414654 | 2.476011  | -2.624438 |
| C  | -0.089475 | 3.041535  | -1.236678 |
| C  | -0.014954 | 1.931347  | -0.119057 |
| C  | 1.285811  | 1.147805  | -0.012558 |
| C  | 1.901251  | 0.488600  | -1.081504 |
| C  | 3.074593  | -0.234427 | -0.901137 |
| Br | 3.839531  | -1.094657 | -2.411194 |
| C  | 3.689906  | -0.335047 | 0.357879  |
| N  | 4.872962  | -1.076693 | 0.490162  |
| C  | 5.606314  | -1.277738 | 1.614098  |
| C  | 6.859169  | -2.162519 | 1.385699  |
| F  | 6.993969  | -2.537711 | 0.104104  |
| F  | 7.949674  | -1.495951 | 1.732882  |
| F  | 6.775232  | -3.258697 | 2.124971  |
| O  | 5.390666  | -0.858920 | 2.724139  |
| C  | 3.077995  | 0.323249  | 1.431056  |
| C  | 1.905401  | 1.043548  | 1.236599  |
| C  | -1.229097 | 1.011779  | -0.095499 |
| C  | -1.340293 | -0.136076 | -0.884982 |
| C  | -2.472853 | -0.940732 | -0.857540 |
| C  | -3.552608 | -0.624646 | -0.022478 |
| N  | -4.718742 | -1.401570 | 0.044275  |
| C  | -5.012567 | -2.523211 | -0.660424 |
| C  | -6.404906 | -3.117708 | -0.324885 |
| F  | -7.055870 | -2.402798 | 0.606147  |
| F  | -6.267947 | -4.353571 | 0.131547  |
| F  | -7.155868 | -3.146338 | -1.415889 |
| O  | -4.331737 | -3.080194 | -1.485314 |
| C  | -3.440425 | 0.521199  | 0.781732  |
| Br | -4.851994 | 1.014514  | 1.951297  |
| C  | -2.301169 | 1.317232  | 0.747086  |
| C  | -1.210246 | 4.047539  | -0.872143 |
| C  | -0.933794 | 4.893079  | 0.372534  |
| C  | 0.414216  | 5.608110  | 0.279111  |
| C  | 1.547001  | 4.633211  | -0.042250 |
| C  | 1.240605  | 3.824736  | -1.302950 |
| H  | -1.374170 | 1.938980  | -2.631431 |
| H  | -0.492166 | 3.300873  | -3.349038 |
| H  | 0.361036  | 1.796744  | -3.003813 |
| H  | -0.064362 | 2.484051  | 0.827591  |
| H  | 1.480608  | 0.533642  | -2.084125 |
| H  | 5.215199  | -1.510307 | -0.362433 |
| H  | 3.535568  | 0.261773  | 2.415684  |
| H  | 1.456247  | 1.542568  | 2.099021  |
| H  | -0.521894 | -0.429451 | -1.543004 |
| H  | -2.536471 | -1.828546 | -1.482385 |
| H  | -5.423554 | -1.076124 | 0.699656  |
| H  | -2.253737 | 2.194757  | 1.394668  |
| H  | -1.325736 | 4.730194  | -1.731812 |
| H  | -2.173946 | 3.521836  | -0.777666 |
| H  | -0.952694 | 4.267247  | 1.281950  |
| H  | -1.746206 | 5.625168  | 0.502087  |

|   |          |          |           |
|---|----------|----------|-----------|
| H | 0.360451 | 6.367152 | -0.521594 |
| H | 0.625418 | 6.153976 | 1.211950  |
| H | 1.715407 | 3.955599 | 0.812559  |
| H | 2.491899 | 5.181715 | -0.179308 |
| H | 1.169652 | 4.522804 | -2.155828 |
| H | 2.074642 | 3.145458 | -1.535438 |

-----  
12-conf08

- Electronic Energy (Eh): -6935.47405989

- Cartesian Coordinates:

|    |           |           |           |
|----|-----------|-----------|-----------|
| C  | 0.539327  | 2.849353  | 2.212187  |
| C  | 0.133671  | 3.333473  | 0.814647  |
| C  | 0.067089  | 2.170461  | -0.248091 |
| C  | -1.198737 | 1.325023  | -0.267998 |
| C  | -1.748521 | 0.698526  | 0.855000  |
| C  | -2.889288 | -0.089195 | 0.753216  |
| Br | -3.563799 | -0.899080 | 2.332670  |
| C  | -3.536737 | -0.289513 | -0.477284 |
| N  | -4.685055 | -1.093057 | -0.529971 |
| C  | -5.442114 | -1.390326 | -1.616309 |
| C  | -6.642927 | -2.318501 | -1.298213 |
| F  | -6.715404 | -2.632297 | 0.004849  |
| F  | -7.775205 | -1.721392 | -1.637910 |
| F  | -6.532549 | -3.446627 | -1.983894 |
| O  | -5.281664 | -1.023986 | -2.753856 |
| C  | -2.991017 | 0.336375  | -1.604331 |
| C  | -1.850114 | 1.121482  | -1.488498 |
| C  | 1.320568  | 1.305855  | -0.280804 |
| C  | 2.353280  | 1.600614  | -1.174488 |
| C  | 3.525636  | 0.854113  | -1.223861 |
| C  | 3.705288  | -0.238541 | -0.367770 |
| N  | 4.863875  | -1.029524 | -0.371705 |
| C  | 5.968143  | -0.882198 | -1.146035 |
| C  | 7.062169  | -1.946742 | -0.873417 |
| F  | 8.179819  | -1.352311 | -0.482611 |
| F  | 7.307768  | -2.632257 | -1.979885 |
| F  | 6.701910  | -2.818165 | 0.081684  |
| O  | 6.176733  | -0.043851 | -1.987538 |
| C  | 2.662897  | -0.546489 | 0.524321  |
| Br | 2.823225  | -2.021319 | 1.709556  |
| C  | 1.496745  | 0.206648  | 0.563946  |
| C  | 1.192790  | 4.368692  | 0.359448  |
| C  | 0.829904  | 5.142540  | -0.909403 |
| C  | -0.545225 | 5.800528  | -0.794274 |
| C  | -1.618651 | 4.792557  | -0.383538 |
| C  | -1.227141 | 4.059894  | 0.899804  |
| H  | 1.525367  | 2.362647  | 2.204630  |
| H  | 0.601424  | 3.709734  | 2.895749  |
| H  | -0.184486 | 2.150132  | 2.652888  |
| H  | 0.057327  | 2.679436  | -1.220183 |
| H  | -1.301881 | 0.820928  | 1.839796  |
| H  | -4.979576 | -1.494384 | 0.355600  |
| H  | -3.474808 | 0.198099  | -2.568421 |
| H  | -1.452264 | 1.591975  | -2.391176 |
| H  | 2.244934  | 2.442135  | -1.862736 |
| H  | 4.314835  | 1.104965  | -1.928743 |
| H  | 4.867934  | -1.801444 | 0.288815  |
| H  | 0.715562  | -0.084074 | 1.265800  |
| H  | 1.311913  | 5.094766  | 1.182308  |
| H  | 2.173790  | 3.879788  | 0.247620  |
| H  | 0.843867  | 4.476414  | -1.789672 |
| H  | 1.602009  | 5.903303  | -1.103775 |
| H  | -0.496409 | 6.598272  | -0.031767 |
| H  | -0.816909 | 6.291720  | -1.741744 |
| H  | -1.787356 | 4.067817  | -1.198738 |
| H  | -2.582208 | 5.304145  | -0.234170 |
| H  | -1.154637 | 4.800890  | 1.715539  |
| H  | -2.019895 | 3.357146  | 1.197759  |



12-conf09

- Electronic Energy (Eh): -6935.47385724

- Cartesian Coordinates:

|    |           |           |           |
|----|-----------|-----------|-----------|
| C  | -0.417627 | 2.478074  | 2.622627  |
| C  | -0.090043 | 3.042651  | 1.235031  |
| C  | -0.015119 | 1.931897  | 0.117992  |
| C  | -1.229131 | 1.012192  | 0.094834  |
| C  | -2.301299 | 1.317070  | -0.747842 |
| C  | -3.440435 | 0.520858  | -0.781955 |
| Br | -4.852170 | 1.013278  | -1.951694 |
| C  | -3.552399 | -0.624564 | 0.022915  |
| N  | -4.718432 | -1.401683 | -0.043325 |
| C  | -5.012003 | -2.522917 | 0.662085  |
| C  | -6.404214 | -3.117922 | 0.326978  |
| F  | -7.155299 | -3.145654 | 1.417903  |
| F  | -7.055162 | -2.403923 | -0.604793 |
| F  | -6.267040 | -4.354180 | -0.128319 |
| O  | -4.331011 | -3.079246 | 1.487298  |
| C  | -2.472533 | -0.940051 | 0.858053  |
| C  | -1.340069 | -0.135239 | 0.884943  |
| C  | 1.285585  | 1.148176  | 0.011901  |
| C  | 1.904023  | 1.041545  | -1.237622 |
| C  | 3.076352  | 0.320739  | -1.431808 |
| C  | 3.689152  | -0.335637 | -0.357971 |
| N  | 4.872078  | -1.077575 | -0.489931 |
| C  | 5.603984  | -1.281292 | -1.614340 |
| C  | 6.857241  | -2.165345 | -1.385384 |
| F  | 7.947384  | -1.498580 | -1.733476 |
| F  | 6.773641  | -3.262257 | -2.123524 |
| F  | 6.992508  | -2.539151 | -0.103422 |
| O  | 5.387019  | -0.864973 | -2.725058 |
| C  | 3.074996  | -0.232620 | 0.901417  |
| Br | 3.841249  | -1.090100 | 2.412359  |
| C  | 1.901904  | 0.490894  | 1.081505  |
| C  | 1.240479  | 3.824955  | 1.302565  |
| C  | 1.549067  | 4.632316  | 0.041678  |
| C  | 0.417472  | 5.607931  | -0.281692 |
| C  | -0.931034 | 4.893977  | -0.376219 |
| C  | -1.209601 | 4.049324  | 0.868595  |
| H  | 0.356005  | 1.796928  | 3.002824  |
| H  | -0.493885 | 3.303222  | 3.347036  |
| H  | -1.378379 | 1.943253  | 2.628836  |
| H  | -0.064443 | 2.484093  | -0.828955 |
| H  | -2.253987 | 2.194250  | -1.395910 |
| H  | -5.423307 | -1.076769 | -0.698906 |
| H  | -2.536001 | -1.827505 | 1.483428  |
| H  | -0.521545 | -0.428085 | 1.543065  |
| H  | 1.454147  | 1.539039  | -2.100551 |
| H  | 3.532966  | 0.257363  | -2.416759 |
| H  | 5.215081  | -1.509683 | 0.363115  |
| H  | 1.482198  | 0.537926  | 2.084421  |
| H  | 1.168847  | 4.523691  | 2.154839  |
| H  | 2.073782  | 3.145342  | 1.536652  |
| H  | 1.717948  | 3.953968  | -0.812457 |
| H  | 2.494246  | 5.180142  | 0.179501  |
| H  | 0.363398  | 6.367567  | 0.518429  |
| H  | 0.630230  | 6.152982  | -1.214653 |
| H  | -0.949500 | 4.267666  | -1.285320 |
| H  | -1.742686 | 5.626680  | -0.507060 |
| H  | -1.325653 | 4.732508  | 1.727770  |
| H  | -2.173569 | 3.524269  | 0.773217  |

-----  
12-conf10

- Electronic Energy (Eh): -6935.47380045

- Cartesian Coordinates:

|   |          |          |           |
|---|----------|----------|-----------|
| C | 0.507061 | 2.246711 | -3.081179 |
| C | 0.114320 | 2.864479 | -1.734109 |
| C | 0.008898 | 1.801093 | -0.574539 |

|    |           |           |           |
|----|-----------|-----------|-----------|
| C  | 1.239475  | 0.912404  | -0.449639 |
| C  | 2.253958  | 1.274028  | 0.440765  |
| C  | 3.406471  | 0.507506  | 0.570677  |
| Br | 4.735868  | 1.076802  | 1.800697  |
| C  | 3.590499  | -0.663422 | -0.182554 |
| N  | 4.767771  | -1.408879 | -0.020547 |
| C  | 5.128612  | -2.545708 | -0.667640 |
| C  | 6.514387  | -3.090823 | -0.234920 |
| F  | 6.387378  | -4.324087 | 0.230470  |
| F  | 7.334216  | -3.109471 | -1.275770 |
| F  | 7.082151  | -2.343005 | 0.724336  |
| O  | 4.510381  | -3.147073 | -1.510367 |
| C  | 2.568340  | -1.035289 | -1.065852 |
| C  | 1.421621  | -0.259979 | -1.188329 |
| C  | -1.280796 | 0.994527  | -0.502199 |
| C  | -1.832857 | 0.257735  | -1.555600 |
| C  | -3.004138 | -0.476840 | -1.409000 |
| C  | -3.681492 | -0.506348 | -0.183826 |
| N  | -4.866029 | -1.229711 | 0.017471  |
| C  | -5.543565 | -1.983522 | -0.884837 |
| C  | -6.819372 | -2.646113 | -0.303559 |
| F  | -7.882197 | -2.253598 | -0.989563 |
| F  | -7.018478 | -2.328572 | 0.985264  |
| F  | -6.719356 | -3.964309 | -0.388242 |
| O  | -5.265577 | -2.182894 | -2.041155 |
| C  | -3.132847 | 0.229927  | 0.878724  |
| Br | -3.987352 | 0.249517  | 2.573282  |
| C  | -1.961691 | 0.960470  | 0.718736  |
| C  | -1.225208 | 3.618285  | -1.889985 |
| C  | -1.598998 | 4.475965  | -0.680946 |
| C  | -0.497141 | 5.484241  | -0.354985 |
| C  | 0.856683  | 4.798135  | -0.171862 |
| C  | 1.201445  | 3.904963  | -1.365164 |
| H  | -0.241042 | 1.536819  | -3.459299 |
| H  | 0.599722  | 3.041088  | -3.837415 |
| H  | 1.475754  | 1.729250  | -3.026073 |
| H  | 0.000736  | 2.395869  | 0.347494  |
| H  | 2.150246  | 2.173562  | 1.050520  |
| H  | 5.424255  | -1.044736 | 0.663758  |
| H  | 2.687773  | -1.942968 | -1.652827 |
| H  | 0.649581  | -0.595747 | -1.881001 |
| H  | -1.355162 | 0.248708  | -2.534217 |
| H  | -3.411699 | -1.038031 | -2.246636 |
| H  | -5.257322 | -1.175599 | 0.953518  |
| H  | -1.570857 | 1.516561  | 1.573494  |
| H  | -1.130893 | 4.279408  | -2.769562 |
| H  | -2.036017 | 2.912599  | -2.126140 |
| H  | -1.793453 | 3.834183  | 0.195765  |
| H  | -2.545797 | 5.000731  | -0.882631 |
| H  | -0.420560 | 6.208116  | -1.185802 |
| H  | -0.757667 | 6.066845  | 0.542532  |
| H  | 0.845286  | 4.212342  | 0.763996  |
| H  | 1.650757  | 5.549495  | -0.039022 |
| H  | 1.344114  | 4.552083  | -2.247917 |
| H  | 2.168162  | 3.400961  | -1.205594 |

-----  
12-conf11

- Electronic Energy (Eh): -6935.473857659999

- Cartesian Coordinates:

|    |           |           |           |
|----|-----------|-----------|-----------|
| C  | 0.417177  | 2.477627  | 2.622986  |
| C  | 0.089940  | 3.042423  | 1.235398  |
| C  | 0.015099  | 1.931800  | 0.118209  |
| C  | -1.285629 | 1.148149  | 0.012015  |
| C  | -1.901692 | 0.490319  | 1.081434  |
| C  | -3.074864 | -0.233035 | 0.901281  |
| Br | -3.840744 | -1.091270 | 2.411999  |
| C  | -3.689368 | -0.335389 | -0.357990 |
| N  | -4.872298 | -1.077302 | -0.490011 |
| C  | -5.604829 | -1.280064 | -1.614177 |

|    |           |           |           |
|----|-----------|-----------|-----------|
| C  | -6.857617 | -2.164833 | -1.385400 |
| F  | -7.947995 | -1.499314 | -1.734956 |
| F  | -6.772544 | -3.262389 | -2.122495 |
| F  | -6.993589 | -2.537645 | -0.103224 |
| O  | -5.388490 | -0.862784 | -2.724663 |
| C  | -3.076830 | 0.321540  | -1.431644 |
| C  | -1.904421 | 1.042195  | -1.237394 |
| C  | 1.229145  | 1.012114  | 0.094981  |
| C  | 1.340111  | -0.135434 | 0.884928  |
| C  | 2.472587  | -0.940215 | 0.857929  |
| C  | 3.552461  | -0.624559 | 0.022851  |
| N  | 4.718529  | -1.401626 | -0.043455 |
| C  | 5.012087  | -2.523109 | 0.661604  |
| C  | 6.404349  | -3.117939 | 0.326363  |
| F  | 7.155052  | -3.146815 | 1.417529  |
| F  | 7.055681  | -2.403136 | -0.604495 |
| F  | 6.267159  | -4.353748 | -0.130172 |
| O  | 4.331071  | -3.079753 | 1.486571  |
| C  | 3.440493  | 0.520980  | -0.781832 |
| Br | 4.852240  | 1.013683  | -1.951437 |
| C  | 2.301315  | 1.317149  | -0.747622 |
| C  | 1.209667  | 4.049043  | 0.869319  |
| C  | 0.931398  | 4.893908  | -0.375415 |
| C  | -0.417040 | 5.607999  | -0.281007 |
| C  | -1.548800 | 4.632450  | 0.041990  |
| C  | -1.240520 | 3.824845  | 1.302797  |
| H  | 1.377756  | 1.942492  | 2.629273  |
| H  | 0.493596  | 3.302686  | 3.347477  |
| H  | -0.356724 | 1.796700  | 3.003032  |
| H  | 0.064472  | 2.484100  | -0.828677 |
| H  | -1.481721 | 0.536784  | 2.084265  |
| H  | -5.215113 | -1.509700 | 0.362967  |
| H  | -3.533746 | 0.258733  | -2.416491 |
| H  | -1.454764 | 1.540127  | -2.100184 |
| H  | 0.521596  | -0.428398 | 1.543000  |
| H  | 2.536060  | -1.827788 | 1.483130  |
| H  | 5.423496  | -1.076453 | -0.698807 |
| H  | 2.254002  | 2.194422  | -1.395560 |
| H  | 1.325626  | 4.732079  | 1.728624  |
| H  | 2.173604  | 3.523913  | 0.774036  |
| H  | 0.949924  | 4.267715  | -1.284596 |
| H  | 1.743154  | 5.626536  | -0.506030 |
| H  | -0.363030 | 6.367491  | 0.519256  |
| H  | -0.629564 | 6.153237  | -1.213914 |
| H  | -1.717591 | 3.954268  | -0.812292 |
| H  | -2.493945 | 5.180354  | 0.179735  |
| H  | -1.168986 | 4.523438  | 2.155197  |
| H  | -2.073925 | 3.145264  | 1.536620  |

-----  
13-conf01

- Electronic Energy (Eh): -6700.78194995

- Cartesian Coordinates:

|    |           |           |           |
|----|-----------|-----------|-----------|
| Br | 4.414573  | 1.848984  | 1.467453  |
| C  | 3.205753  | 1.287447  | 0.115323  |
| C  | 2.085899  | 2.076990  | -0.137951 |
| C  | 1.163834  | 1.711963  | -1.117577 |
| C  | -0.089102 | 2.521508  | -1.417198 |
| C  | -0.132951 | 3.895334  | -0.742270 |
| C  | -1.346677 | 1.730837  | -1.085755 |
| C  | -1.456187 | 1.038017  | 0.122614  |
| C  | -2.623524 | 0.359941  | 0.447343  |
| Br | -2.700661 | -0.565248 | 2.103128  |
| C  | -3.727942 | 0.345677  | -0.424731 |
| N  | -4.884626 | -0.357396 | -0.055835 |
| C  | -6.041894 | -0.479432 | -0.753599 |
| C  | -7.116053 | -1.329998 | -0.027436 |
| F  | -8.188286 | -0.589040 | 0.211947  |
| F  | -6.678715 | -1.814377 | 1.145307  |
| F  | -7.467205 | -2.355660 | -0.787777 |

|   |           |           |           |
|---|-----------|-----------|-----------|
| O | -6.310027 | -0.010734 | -1.831969 |
| C | -3.614216 | 1.039263  | -1.635577 |
| C | -2.440591 | 1.717042  | -1.950951 |
| C | 1.405553  | 0.533353  | -1.832858 |
| C | 2.518594  | -0.257748 | -1.590511 |
| C | 3.446690  | 0.106627  | -0.602700 |
| N | 4.587979  | -0.655632 | -0.313106 |
| C | 4.985840  | -1.814704 | -0.896410 |
| C | 6.309880  | -2.375743 | -0.315935 |
| F | 6.107363  | -3.589465 | 0.173770  |
| F | 7.224461  | -2.447719 | -1.271635 |
| F | 6.801577  | -1.608656 | 0.669710  |
| O | 4.440090  | -2.424811 | -1.781702 |
| H | 1.949680  | 2.985799  | 0.448182  |
| H | -0.098261 | 2.690288  | -2.506936 |
| H | 0.748691  | 4.499393  | -1.004064 |
| H | -1.030346 | 4.442296  | -1.063701 |
| H | -0.181426 | 3.803969  | 0.353804  |
| H | -0.615472 | 1.014618  | 0.819090  |
| H | -4.841219 | -0.828794 | 0.843074  |
| H | -4.456798 | 1.035301  | -2.323170 |
| H | -2.382592 | 2.248491  | -2.904283 |
| H | 0.695256  | 0.217771  | -2.601267 |
| H | 2.688818  | -1.169443 | -2.158525 |
| H | 5.182602  | -0.288878 | 0.424599  |

-----  
13-conf02

- Electronic Energy (Eh): -6700.782051609999

- Cartesian Coordinates:

|    |           |           |           |
|----|-----------|-----------|-----------|
| Br | -2.983862 | 0.323200  | -2.584323 |
| C  | -2.662244 | -0.652411 | -0.988278 |
| C  | -1.524360 | -1.440603 | -0.911075 |
| C  | -1.237162 | -2.182658 | 0.240859  |
| C  | 0.038942  | -3.011469 | 0.273023  |
| C  | 0.158817  | -3.935288 | 1.488356  |
| C  | 1.272457  | -2.127700 | 0.157995  |
| C  | 1.393976  | -0.969777 | 0.930723  |
| C  | 2.540899  | -0.190239 | 0.863285  |
| Br | 2.636242  | 1.372574  | 1.936503  |
| C  | 3.612107  | -0.536304 | 0.018489  |
| N  | 4.748961  | 0.285039  | -0.019163 |
| C  | 5.870447  | 0.119037  | -0.764535 |
| C  | 6.928806  | 1.231411  | -0.547546 |
| F  | 7.167293  | 1.853903  | -1.692322 |
| F  | 8.058605  | 0.696803  | -0.108939 |
| F  | 6.530950  | 2.149229  | 0.347158  |
| O  | 6.117159  | -0.766760 | -1.544935 |
| C  | 3.486315  | -1.695863 | -0.755808 |
| C  | 2.333234  | -2.471224 | -0.679793 |
| C  | -2.133682 | -2.101113 | 1.304969  |
| C  | -3.279171 | -1.309701 | 1.238310  |
| C  | -3.566441 | -0.568418 | 0.088540  |
| N  | -4.703485 | 0.244030  | -0.032807 |
| C  | -5.676293 | 0.455351  | 0.889160  |
| C  | -6.786157 | 1.424856  | 0.406722  |
| F  | -7.959497 | 0.810543  | 0.426631  |
| F  | -6.841968 | 2.478010  | 1.208347  |
| F  | -6.571759 | 1.866800  | -0.842286 |
| O  | -5.761100 | -0.012885 | 1.997273  |
| H  | -0.840030 | -1.471403 | -1.761757 |
| H  | 0.021896  | -3.651277 | -0.625167 |
| H  | -0.702847 | -4.615458 | 1.561432  |
| H  | 1.070285  | -4.544016 | 1.407528  |
| H  | 0.229841  | -3.360434 | 2.424455  |
| H  | 0.577976  | -0.662023 | 1.587996  |
| H  | 4.719947  | 1.099048  | 0.588129  |
| H  | 4.302933  | -1.975885 | -1.417244 |
| H  | 2.265236  | -3.370678 | -1.297077 |
| H  | -1.954085 | -2.662585 | 2.222562  |

|   |           |           |           |
|---|-----------|-----------|-----------|
| H | -3.965757 | -1.258315 | 2.080146  |
| H | -4.801037 | 0.729742  | -0.919861 |

-----  
13-conf03

- Electronic Energy (Eh): -6700.78161222

- Cartesian Coordinates:

|    |           |           |           |
|----|-----------|-----------|-----------|
| Br | -4.936953 | -1.403791 | -1.962751 |
| C  | -3.477637 | -1.099819 | -0.787467 |
| C  | -2.341241 | -1.891490 | -0.923912 |
| C  | -1.238683 | -1.706145 | -0.090236 |
| C  | -0.017925 | -2.606788 | -0.209202 |
| C  | -0.054962 | -3.697596 | 0.864604  |
| C  | 1.263611  | -1.785879 | -0.230295 |
| C  | 2.233619  | -1.869392 | 0.767201  |
| C  | 3.382124  | -1.082437 | 0.711126  |
| Br | 4.656305  | -1.250691 | 2.108682  |
| C  | 3.604537  | -0.185834 | -0.344675 |
| N  | 4.776287  | 0.585148  | -0.359806 |
| C  | 5.165368  | 1.491362  | -1.292164 |
| C  | 6.528629  | 2.158798  | -0.974460 |
| F  | 7.078085  | 1.687475  | 0.155845  |
| F  | 6.366654  | 3.466241  | -0.834904 |
| F  | 7.379138  | 1.937211  | -1.965142 |
| O  | 4.584026  | 1.818013  | -2.296776 |
| C  | 2.627349  | -0.104341 | -1.348760 |
| C  | 1.486259  | -0.889801 | -1.282140 |
| C  | -1.310361 | -0.703823 | 0.880710  |
| C  | -2.440638 | 0.089853  | 1.026498  |
| C  | -3.551697 | -0.094224 | 0.190639  |
| N  | -4.715838 | 0.682283  | 0.291687  |
| C  | -4.977170 | 1.680438  | 1.173257  |
| C  | -6.377648 | 2.319796  | 0.986597  |
| F  | -6.249469 | 3.608328  | 0.707396  |
| F  | -7.072693 | 1.748146  | -0.009300 |
| F  | -7.081802 | 2.192369  | 2.101175  |
| O  | -4.262730 | 2.103207  | 2.047794  |
| H  | -2.322150 | -2.663512 | -1.696113 |
| H  | -0.081737 | -3.108360 | -1.189279 |
| H  | -0.978521 | -4.285771 | 0.769898  |
| H  | 0.799573  | -4.384061 | 0.768674  |
| H  | -0.044494 | -3.266143 | 1.877330  |
| H  | 2.113881  | -2.550798 | 1.609386  |
| H  | 5.405464  | 0.439082  | 0.424330  |
| H  | 2.782130  | 0.584491  | -2.175980 |
| H  | 0.738648  | -0.796239 | -2.073903 |
| H  | -0.455854 | -0.526295 | 1.538298  |
| H  | -2.480480 | 0.867001  | 1.786277  |
| H  | -5.447739 | 0.461682  | -0.377368 |

-----  
13-conf04

- Electronic Energy (Eh): -6700.78167861

- Cartesian Coordinates:

|    |           |           |           |
|----|-----------|-----------|-----------|
| Br | -4.750840 | -1.981021 | -1.175925 |
| C  | -3.343103 | -1.304844 | -0.096893 |
| C  | -2.227251 | -2.108798 | 0.116579  |
| C  | -1.162581 | -1.658139 | 0.896427  |
| C  | 0.036090  | -2.555807 | 1.165550  |
| C  | -0.076456 | -3.194000 | 2.552623  |
| C  | 1.340835  | -1.809241 | 0.923204  |
| C  | 1.601718  | -1.319402 | -0.362031 |
| C  | 2.767159  | -0.621305 | -0.638104 |
| Br | 3.049730  | 0.009797  | -2.405820 |
| C  | 3.726992  | -0.378308 | 0.363758  |
| N  | 4.891149  | 0.334010  | 0.039646  |
| C  | 5.923816  | 0.655524  | 0.859008  |
| C  | 7.056371  | 1.441349  | 0.148871  |
| F  | 7.256792  | 2.596699  | 0.763563  |
| F  | 6.771314  | 1.699965  | -1.136860 |

|   |           |           |           |
|---|-----------|-----------|-----------|
| F | 8.179446  | 0.738468  | 0.183877  |
| O | 6.047524  | 0.397863  | 2.030604  |
| C | 3.465427  | -0.866927 | 1.647091  |
| C | 2.291620  | -1.569740 | 1.913808  |
| C | -1.250985 | -0.379511 | 1.453537  |
| C | -2.361078 | 0.429258  | 1.248502  |
| C | -3.433763 | -0.020497 | 0.464641  |
| N | -4.575520 | 0.757180  | 0.220167  |
| C | -4.845518 | 2.007006  | 0.675000  |
| C | -6.212887 | 2.557863  | 0.193500  |
| F | -6.874776 | 1.680942  | -0.577682 |
| F | -6.976874 | 2.840631  | 1.237817  |
| F | -6.028049 | 3.663430  | -0.512433 |
| O | -4.160630 | 2.702618  | 1.382783  |
| H | -2.194241 | -3.101872 | -0.336677 |
| H | -0.000132 | -3.372388 | 0.424976  |
| H | 0.758619  | -3.883808 | 2.745498  |
| H | -0.088948 | -2.431367 | 3.346227  |
| H | -1.014187 | -3.762213 | 2.628401  |
| H | 0.875259  | -1.478190 | -1.161960 |
| H | 4.960051  | 0.642341  | -0.925963 |
| H | 4.194840  | -0.689540 | 2.434042  |
| H | 2.134079  | -1.932445 | 2.930195  |
| H | -0.425175 | 0.004768  | 2.057324  |
| H | -2.414166 | 1.422894  | 1.687494  |
| H | -5.280820 | 0.324399  | -0.369215 |

-----  
13-conf05

- Electronic Energy (Eh): -6700.781950109999

- Cartesian Coordinates:

|    |           |           |           |
|----|-----------|-----------|-----------|
| Br | -2.701111 | -0.563897 | -2.103674 |
| C  | -2.623693 | 0.360334  | -0.447373 |
| C  | -1.456364 | 1.038330  | -0.122494 |
| C  | -1.346649 | 1.730450  | 1.086269  |
| C  | -0.089062 | 2.521013  | 1.417851  |
| C  | -0.132911 | 3.895027  | 0.743291  |
| C  | 1.163848  | 1.711530  | 1.117948  |
| C  | 2.085971  | 2.076887  | 0.138498  |
| C  | 3.205828  | 1.287425  | -0.115000 |
| Br | 4.414652  | 1.849383  | -1.466949 |
| C  | 3.446712  | 0.106337  | 0.602610  |
| N  | 4.587957  | -0.655893 | 0.312763  |
| C  | 4.986191  | -1.814730 | 0.896275  |
| C  | 6.309937  | -2.375943 | 0.315271  |
| F  | 6.106822  | -3.589282 | -0.175195 |
| F  | 7.224618  | -2.448947 | 1.270776  |
| F  | 6.801832  | -1.608460 | -0.669958 |
| O  | 4.440828  | -2.424639 | 1.781941  |
| C  | 2.518551  | -0.258386 | 1.590228  |
| C  | 1.405512  | 0.532650  | 1.832799  |
| C  | -2.440362 | 1.716017  | 1.951696  |
| C  | -3.613981 | 1.038273  | 1.636195  |
| C  | -3.727911 | 0.345415  | 0.424960  |
| N  | -4.884589 | -0.357603 | 0.055912  |
| C  | -6.041739 | -0.480069 | 0.753793  |
| C  | -7.116020 | -1.330162 | 0.027246  |
| F  | -8.188094 | -0.588875 | -0.211930 |
| F  | -6.678715 | -1.814174 | -1.145654 |
| F  | -7.467441 | -2.356024 | 0.787178  |
| O  | -6.309718 | -0.012025 | 1.832483  |
| H  | -0.615794 | 1.015439  | -0.819165 |
| H  | -0.098140 | 2.689511  | 2.507634  |
| H  | -1.030341 | 4.441874  | 1.064822  |
| H  | 0.748696  | 4.499042  | 1.005302  |
| H  | -0.181313 | 3.803956  | -0.352811 |
| H  | 1.949788  | 2.985891  | -0.447343 |
| H  | 5.182356  | -0.289153 | -0.425131 |
| H  | 2.688760  | -1.170257 | 2.157968  |
| H  | 0.695161  | 0.216774  | 2.601039  |

|   |           |           |           |
|---|-----------|-----------|-----------|
| H | -2.382210 | 2.246897  | 2.905337  |
| H | -4.456403 | 1.033803  | 2.323980  |
| H | -4.841294 | -0.828506 | -0.843261 |

-----  
13-conf06

- Electronic Energy (Eh): -6700.78167856

- Cartesian Coordinates:

|    |           |           |           |
|----|-----------|-----------|-----------|
| Br | -3.049756 | 0.010100  | -2.405678 |
| C  | -2.767262 | -0.621163 | -0.638013 |
| C  | -1.601748 | -1.319110 | -0.361901 |
| C  | -1.340869 | -1.808996 | 0.923320  |
| C  | -0.036087 | -2.555509 | 1.165633  |
| C  | 0.076571  | -3.193609 | 2.552753  |
| C  | 1.162567  | -1.657906 | 0.896350  |
| C  | 2.227223  | -2.108688 | 0.116543  |
| C  | 3.343100  | -1.304809 | -0.097029 |
| Br | 4.750801  | -1.981155 | -1.175998 |
| C  | 3.433791  | -0.020383 | 0.464338  |
| N  | 4.575512  | 0.757304  | 0.219649  |
| C  | 4.846156  | 2.006581  | 0.675579  |
| C  | 6.213203  | 2.557682  | 0.193445  |
| F  | 6.977601  | 2.840683  | 1.237388  |
| F  | 6.027781  | 3.663173  | -0.512499 |
| F  | 6.874908  | 1.680857  | -0.577996 |
| O  | 4.161895  | 2.701710  | 1.384438  |
| C  | 2.361138  | 0.429507  | 1.248150  |
| C  | 1.251029  | -0.379218 | 1.453309  |
| C  | -2.291742 | -1.569656 | 1.913876  |
| C  | -3.465647 | -0.867010 | 1.647119  |
| C  | -3.727211 | -0.378386 | 0.363793  |
| N  | -4.891487 | 0.333734  | 0.039593  |
| C  | -5.924098 | 0.655366  | 0.858959  |
| C  | -7.056640 | 1.441154  | 0.148771  |
| F  | -7.256799 | 2.596695  | 0.763192  |
| F  | -6.771739 | 1.699372  | -1.137069 |
| F  | -8.179823 | 0.738445  | 0.184134  |
| O  | -6.047798 | 0.397848  | 2.030590  |
| H  | -0.875198 | -1.477722 | -1.161787 |
| H  | 0.000047  | -3.372169 | 0.425135  |
| H  | -0.758459 | -3.883445 | 2.745720  |
| H  | 1.014337  | -3.761773 | 2.628504  |
| H  | 0.089073  | -2.430910 | 3.346292  |
| H  | 2.194165  | -3.101817 | -0.336596 |
| H  | 5.280483  | 0.324727  | -0.370275 |
| H  | 2.414310  | 1.423155  | 1.687108  |
| H  | 0.425246  | 0.005160  | 2.057074  |
| H  | -2.134216 | -1.932322 | 2.930280  |
| H  | -4.195132 | -0.689784 | 2.434038  |
| H  | -4.960378 | 0.641983  | -0.926044 |

-----  
13-conf07

- Electronic Energy (Eh): -6700.78195031

- Cartesian Coordinates:

|    |           |           |           |
|----|-----------|-----------|-----------|
| Br | 2.701527  | -0.562196 | 2.104351  |
| C  | 2.623807  | 0.360921  | 0.447443  |
| C  | 1.456491  | 1.038857  | 0.122397  |
| C  | 1.346587  | 1.730212  | -1.086786 |
| C  | 0.088980  | 2.520651  | -1.418582 |
| C  | 0.132764  | 3.894851  | -0.744411 |
| C  | -1.163871 | 1.711160  | -1.118415 |
| C  | -2.086098 | 2.076860  | -0.139191 |
| C  | -3.205892 | 1.287393  | 0.114574  |
| Br | -4.414931 | 1.849865  | 1.466120  |
| C  | -3.446595 | 0.105973  | -0.602543 |
| N  | -4.587816 | -0.656221 | -0.312463 |
| C  | -4.985810 | -1.815418 | -0.895408 |
| C  | -6.309758 | -2.376318 | -0.314578 |
| F  | -6.107129 | -3.589896 | 0.175458  |

|   |           |           |           |
|---|-----------|-----------|-----------|
| F | -7.224466 | -2.448618 | -1.270130 |
| F | -6.801357 | -1.608973 | 0.670909  |
| O | -4.440204 | -2.425770 | -1.780622 |
| C | -2.518336 | -0.259096 | -1.589934 |
| C | -1.405357 | 0.531947  | -1.832771 |
| C | 2.440090  | 1.715073  | -1.952464 |
| C | 3.613704  | 1.037398  | -1.636792 |
| C | 3.727825  | 0.345315  | -0.425131 |
| N | 4.884545  | -0.357498 | -0.055819 |
| C | 6.041239  | -0.481255 | -0.754229 |
| C | 7.115838  | -1.330375 | -0.027003 |
| F | 8.187081  | -0.588034 | 0.212845  |
| F | 6.678262  | -1.814718 | 1.145663  |
| F | 7.468726  | -2.355900 | -0.786632 |
| O | 6.308741  | -0.014656 | -1.833664 |
| H | 0.616071  | 1.016505  | 0.819268  |
| H | 0.098039  | 2.688831  | -2.508413 |
| H | 1.030148  | 4.441662  | -1.066125 |
| H | -0.748894 | 4.498728  | -1.006561 |
| H | 0.181210  | 3.804101  | 0.351716  |
| H | -1.950061 | 2.986161  | 0.446221  |
| H | -5.182323 | -0.289184 | 0.425196  |
| H | -2.688402 | -1.171244 | -2.157271 |
| H | -0.694924 | 0.215825  | -2.600833 |
| H | 2.381772  | 2.245338  | -2.906436 |
| H | 4.455953  | 1.032326  | -2.324785 |
| H | 4.841429  | -0.827687 | 0.843735  |

-----  
13-conf08

- Electronic Energy (Eh): -6700.78161213

- Cartesian Coordinates:

|    |           |           |           |
|----|-----------|-----------|-----------|
| Br | -4.656050 | -1.250087 | 2.109141  |
| C  | -3.382075 | -1.082049 | 0.711377  |
| C  | -2.233471 | -1.868854 | 0.767509  |
| C  | -1.263633 | -1.785537 | -0.230171 |
| C  | 0.017966  | -2.606313 | -0.209045 |
| C  | 0.055145  | -3.696973 | 0.864916  |
| C  | 1.238713  | -1.705629 | -0.090217 |
| C  | 2.341647  | -1.891821 | -0.923217 |
| C  | 3.478106  | -1.100227 | -0.786859 |
| Br | 4.937913  | -1.405385 | -1.961221 |
| C  | 3.551869  | -0.093871 | 0.190488  |
| N  | 4.716061  | 0.682550  | 0.291453  |
| C  | 4.977199  | 1.681335  | 1.172356  |
| C  | 6.377746  | 2.320504  | 0.985602  |
| F  | 7.081173  | 2.195010  | 2.100829  |
| F  | 6.249577  | 3.608587  | 0.704199  |
| F  | 7.073513  | 1.747346  | -0.008903 |
| O  | 4.262508  | 2.104882  | 2.046310  |
| C  | 2.440437  | 0.091045  | 1.025654  |
| C  | 1.310084  | -0.702552 | 0.879957  |
| C  | -1.486537 | -0.889774 | -1.282232 |
| C  | -2.627728 | -0.104459 | -1.348896 |
| C  | -3.604765 | -0.185788 | -0.344652 |
| N  | -4.776632 | 0.585006  | -0.359835 |
| C  | -5.165995 | 1.490939  | -1.292353 |
| C  | -6.529576 | 2.157825  | -0.974892 |
| F  | -6.368382 | 3.465432  | -0.836284 |
| F  | -7.380112 | 1.935026  | -1.965309 |
| F  | -7.078623 | 1.686952  | 0.155805  |
| O  | -4.584700 | 1.817712  | -2.296949 |
| H  | -2.113502 | -2.549986 | 1.609886  |
| H  | 0.081784  | -3.107994 | -1.189070 |
| H  | -0.799332 | -4.383538 | 0.769128  |
| H  | 0.978756  | -4.285080 | 0.770253  |
| H  | 0.044689  | -3.265363 | 1.877580  |
| H  | 2.322813  | -2.664449 | -1.694823 |
| H  | 5.448253  | 0.461252  | -0.377062 |
| H  | 2.480041  | 0.868786  | 1.784846  |

|   |           |           |           |
|---|-----------|-----------|-----------|
| H | 0.455293  | -0.524362 | 1.536998  |
| H | -0.739053 | -0.796351 | -2.074135 |
| H | -2.782691 | 0.584145  | -2.176273 |
| H | -5.405848 | 0.438805  | 0.424251  |

-----  
13-conf09

- Electronic Energy (Eh): -6700.781612089999

- Cartesian Coordinates:

|    |           |           |           |
|----|-----------|-----------|-----------|
| Br | -4.937655 | -1.404818 | -1.961511 |
| C  | -3.477983 | -1.100477 | -0.786772 |
| C  | -2.341559 | -1.892077 | -0.923440 |
| C  | -1.238748 | -1.706473 | -0.090163 |
| C  | -0.017960 | -2.607036 | -0.209361 |
| C  | -0.054818 | -3.697949 | 0.864343  |
| C  | 1.263531  | -1.786076 | -0.230468 |
| C  | 2.233344  | -1.869257 | 0.767243  |
| C  | 3.381799  | -1.082223 | 0.711197  |
| Br | 4.655677  | -1.249989 | 2.109075  |
| C  | 3.604340  | -0.185863 | -0.344778 |
| N  | 4.776084  | 0.585141  | -0.359907 |
| C  | 5.165224  | 1.491291  | -1.292300 |
| C  | 6.528763  | 2.158274  | -0.974885 |
| F  | 7.077190  | 1.688482  | 0.156565  |
| F  | 6.367773  | 3.466046  | -0.837756 |
| F  | 7.379734  | 1.934232  | -1.964672 |
| O  | 4.583851  | 1.818025  | -2.296865 |
| C  | 2.627319  | -0.104649 | -1.349037 |
| C  | 1.486277  | -0.890195 | -1.282460 |
| C  | -1.310200 | -0.703978 | 0.880620  |
| C  | -2.440500 | 0.089625  | 1.026623  |
| C  | -3.551809 | -0.094691 | 0.191153  |
| N  | -4.715934 | 0.681828  | 0.292344  |
| C  | -4.976941 | 1.680335  | 1.173602  |
| C  | -6.376534 | 2.321202  | 0.985614  |
| F  | -7.077962 | 2.204679  | 2.102918  |
| F  | -6.246072 | 3.607208  | 0.695364  |
| F  | -7.075466 | 1.743094  | -0.003825 |
| O  | -4.262341 | 2.103211  | 2.047960  |
| H  | -2.322658 | -2.664243 | -1.695506 |
| H  | -0.081838 | -3.108499 | -1.189492 |
| H  | -0.978346 | -4.286185 | 0.769663  |
| H  | 0.799758  | -4.384347 | 0.768263  |
| H  | -0.044285 | -3.266604 | 1.877117  |
| H  | 2.113465  | -2.550435 | 1.609596  |
| H  | 5.405098  | 0.439289  | 0.424403  |
| H  | 2.782139  | 0.584065  | -2.176351 |
| H  | 0.738795  | -0.796852 | -2.074374 |
| H  | -0.455503 | -0.526265 | 1.537912  |
| H  | -2.480159 | 0.866893  | 1.786290  |
| H  | -5.448416 | 0.460376  | -0.375799 |

-----  
13-conf10

- Electronic Energy (Eh): -6700.78195019

- Cartesian Coordinates:

|    |           |           |           |
|----|-----------|-----------|-----------|
| Br | 4.414871  | 1.849480  | 1.466734  |
| C  | 3.205875  | 1.287428  | 0.114979  |
| C  | 2.086037  | 2.076929  | -0.138515 |
| C  | 1.163840  | 1.711532  | -1.117873 |
| C  | -0.089044 | 2.521064  | -1.417775 |
| C  | -0.132862 | 3.895064  | -0.743192 |
| C  | -1.346653 | 1.730531  | -1.086216 |
| C  | -1.456363 | 1.038368  | 0.122523  |
| C  | -2.623704 | 0.360392  | 0.447400  |
| Br | -2.701138 | -0.563873 | 2.103678  |
| C  | -3.727940 | 0.345554  | -0.424908 |
| N  | -4.884648 | -0.357406 | -0.055832 |
| C  | -6.041701 | -0.480105 | -0.753823 |
| C  | -7.115980 | -1.330193 | -0.027273 |

|   |           |           |           |
|---|-----------|-----------|-----------|
| F | -8.187986 | -0.588870 | 0.212075  |
| F | -6.678601 | -1.814345 | 1.145555  |
| F | -7.467524 | -2.355960 | -0.787264 |
| O | -6.309632 | -0.012205 | -1.832590 |
| C | -3.614020 | 1.038461  | -1.636117 |
| C | -2.440379 | 1.716163  | -1.951625 |
| C | 1.405396  | 0.532579  | -1.832649 |
| C | 2.518413  | -0.258485 | -1.590087 |
| C | 3.446650  | 0.106280  | -0.602551 |
| N | 4.587893  | -0.655969 | -0.312718 |
| C | 4.986018  | -1.814877 | -0.896151 |
| C | 6.309820  | -2.376067 | -0.315262 |
| F | 6.106787  | -3.589445 | 0.175123  |
| F | 7.224449  | -2.448955 | -1.270832 |
| F | 6.801732  | -1.608626 | 0.669997  |
| O | 4.440548  | -2.424857 | -1.781703 |
| H | 1.949953  | 2.985999  | 0.447245  |
| H | -0.098108 | 2.689584  | -2.507556 |
| H | 0.748784  | 4.499042  | -1.005153 |
| H | -1.030252 | 4.441956  | -1.064756 |
| H | -0.181321 | 3.803981  | 0.352907  |
| H | -0.615777 | 1.015424  | 0.819174  |
| H | -4.841365 | -0.828281 | 0.843356  |
| H | -4.456461 | 1.034050  | -2.323879 |
| H | -2.382225 | 2.247077  | -2.905247 |
| H | 0.694980  | 0.216693  | -2.600824 |
| H | 2.688552  | -1.170414 | -2.157754 |
| H | 5.182408  | -0.289148 | 0.425042  |

-----  
13-conf11

- Electronic Energy (Eh): -6700.7816781

- Cartesian Coordinates:

|    |           |           |           |
|----|-----------|-----------|-----------|
| Br | 3.050769  | 0.008970  | 2.406054  |
| C  | 2.767658  | -0.621456 | 0.638185  |
| C  | 1.602126  | -1.319399 | 0.362175  |
| C  | 1.340815  | -1.808673 | -0.923201 |
| C  | 0.036005  | -2.555146 | -1.165399 |
| C  | -0.076741 | -3.193294 | -2.552495 |
| C  | -1.162646 | -1.657542 | -0.896120 |
| C  | -2.227640 | -2.108656 | -0.116951 |
| C  | -3.343578 | -1.304862 | 0.096556  |
| Br | -4.751792 | -1.981767 | 1.174519  |
| C  | -3.434035 | -0.020141 | -0.464215 |
| N  | -4.575762 | 0.757493  | -0.219565 |
| C  | -4.846118 | 2.007052  | -0.674875 |
| C  | -6.213130 | 2.558143  | -0.192659 |
| F  | -6.977185 | 2.842240  | -1.236544 |
| F  | -6.027573 | 3.662993  | 0.514240  |
| F  | -6.875284 | 1.680871  | 0.577893  |
| O  | -4.161599 | 2.702431  | -1.383253 |
| C  | -2.361055 | 0.430050  | -1.247421 |
| C  | -1.250880 | -0.378601 | -1.452520 |
| C  | 2.291264  | -1.568707 | -1.913999 |
| C  | 3.465185  | -0.866037 | -1.647345 |
| C  | 3.727193  | -0.378038 | -0.363877 |
| N  | 4.891482  | 0.334091  | -0.039779 |
| C  | 5.924187  | 0.655425  | -0.859161 |
| C  | 7.056794  | 1.441213  | -0.149074 |
| F  | 8.179978  | 0.738524  | -0.184534 |
| F  | 7.256876  | 2.596764  | -0.763493 |
| F  | 6.772000  | 1.699431  | 1.136804  |
| O  | 6.047894  | 0.397705  | -2.030743 |
| H  | 0.875901  | -1.478527 | 1.162255  |
| H  | -0.000111 | -3.371765 | -0.424854 |
| H  | 0.758332  | -3.883063 | -2.745529 |
| H  | -1.014472 | -3.761529 | -2.628151 |
| H  | -0.089387 | -2.430604 | -3.346042 |
| H  | -2.194794 | -3.101995 | 0.335749  |
| H  | -5.280985 | 0.324683  | 0.369899  |

|   |           |           |           |
|---|-----------|-----------|-----------|
| H | -2.414086 | 1.423907  | -1.685935 |
| H | -0.424893 | 0.006047  | -2.055835 |
| H | 2.133385  | -1.930883 | -2.930525 |
| H | 4.194374  | -0.688403 | -2.434446 |
| H | 4.960414  | 0.642494  | 0.925804  |

-----  
13-conf12

- Electronic Energy (Eh): -6700.78205152

- Cartesian Coordinates:

|    |           |           |           |
|----|-----------|-----------|-----------|
| Br | -2.635976 | 1.373363  | 1.935736  |
| C  | -2.540792 | -0.189889 | 0.863138  |
| C  | -1.393876 | -0.969423 | 0.930765  |
| C  | -1.272469 | -2.127650 | 0.158481  |
| C  | -0.038972 | -3.011433 | 0.273706  |
| C  | -0.158847 | -3.934935 | 1.489275  |
| C  | 1.237160  | -2.182673 | 0.241307  |
| C  | 1.524348  | -1.440847 | -0.910777 |
| C  | 2.662259  | -0.652709 | -0.988155 |
| Br | 2.983876  | 0.322574  | -2.584404 |
| C  | 3.566487  | -0.568542 | 0.088627  |
| N  | 4.703535  | 0.243869  | -0.032890 |
| C  | 5.676298  | 0.455443  | 0.889068  |
| C  | 6.786086  | 1.424970  | 0.406513  |
| F  | 6.841408  | 2.478498  | 1.207712  |
| F  | 6.571926  | 1.866336  | -0.842743 |
| F  | 7.959549  | 0.810962  | 0.427022  |
| O  | 5.761092  | -0.012583 | 1.997272  |
| C  | 3.279239  | -1.309619 | 1.238533  |
| C  | 2.133722  | -2.100973 | 1.305371  |
| C  | -2.333341 | -2.471481 | -0.679061 |
| C  | -3.486420 | -1.696134 | -0.755252 |
| C  | -3.612107 | -0.536267 | 0.018605  |
| N  | -4.748962 | 0.285060  | -0.019200 |
| C  | -5.870513 | 0.118836  | -0.764431 |
| C  | -6.928951 | 1.231154  | -0.547556 |
| F  | -8.058360 | 0.696598  | -0.107865 |
| F  | -6.530723 | 2.149666  | 0.346269  |
| F  | -7.168289 | 1.852800  | -1.692606 |
| O  | -6.117289 | -0.767213 | -1.544526 |
| H  | -0.577802 | -0.661422 | 1.587828  |
| H  | -0.021988 | -3.651463 | -0.624326 |
| H  | -1.070363 | -4.543619 | 1.408660  |
| H  | 0.702768  | -4.615151 | 1.562478  |
| H  | -0.229779 | -3.359842 | 2.425235  |
| H  | 0.840002  | -1.471796 | -1.761437 |
| H  | 4.801140  | 0.729318  | -0.920083 |
| H  | 3.965860  | -1.258106 | 2.080335  |
| H  | 1.954131  | -2.662294 | 2.223056  |
| H  | -2.265428 | -3.371180 | -1.295996 |
| H  | -4.303108 | -1.976397 | -1.416496 |
| H  | -4.719836 | 1.099314  | 0.587758  |

-----  
13-conf13

- Electronic Energy (Eh): -6700.78205157

- Cartesian Coordinates:

|    |           |           |           |
|----|-----------|-----------|-----------|
| Br | 2.983778  | -0.323002 | -2.584361 |
| C  | 2.662220  | 0.652560  | -0.988273 |
| C  | 1.524329  | 1.440742  | -0.911002 |
| C  | 1.237177  | 2.182765  | 0.240961  |
| C  | -0.038946 | 3.011548  | 0.273230  |
| C  | -0.158821 | 3.935245  | 1.488651  |
| C  | -1.272440 | 2.127744  | 0.158145  |
| C  | -1.393907 | 0.969736  | 0.930747  |
| C  | -2.540804 | 0.190166  | 0.863224  |
| Br | -2.636090 | -1.372765 | 1.936284  |
| C  | -3.612035 | 0.536278  | 0.018476  |
| N  | -4.748842 | -0.285112 | -0.019247 |
| C  | -5.870424 | -0.119004 | -0.764455 |

|   |           |           |           |
|---|-----------|-----------|-----------|
| C | -6.928751 | -1.231417 | -0.547516 |
| F | -7.167388 | -1.853714 | -1.692371 |
| F | -8.058487 | -0.696871 | -0.108679 |
| F | -6.530780 | -2.149383 | 0.346975  |
| O | -6.117249 | 0.766936  | -1.544657 |
| C | -3.486291 | 1.695933  | -0.755691 |
| C | -2.333236 | 2.471323  | -0.679598 |
| C | 2.133755  | 2.101217  | 1.305027  |
| C | 3.279246  | 1.309822  | 1.238298  |
| C | 3.566460  | 0.568548  | 0.088505  |
| N | 4.703493  | -0.243902 | -0.032883 |
| C | 5.676237  | -0.455380 | 0.889117  |
| C | 6.785997  | -1.425006 | 0.406686  |
| F | 7.959490  | -0.811047 | 0.427175  |
| F | 6.841252  | -2.478466 | 1.207978  |
| F | 6.571855  | -1.866475 | -0.842530 |
| O | 5.761032  | 0.012784  | 1.997261  |
| H | 0.839969  | 1.471562  | -1.761657 |
| H | -0.021954 | 3.651432  | -0.624905 |
| H | 0.702805  | 4.615460  | 1.561757  |
| H | -1.070324 | 4.543933  | 1.407925  |
| H | -0.229771 | 3.360300  | 2.424700  |
| H | -0.577897 | 0.661936  | 1.587984  |
| H | -4.719763 | -1.099193 | 0.587947  |
| H | -4.302927 | 1.976003  | -1.417081 |
| H | -2.265276 | 3.370853  | -1.296776 |
| H | 1.954192  | 2.662693  | 2.222624  |
| H | 3.965880  | 1.258416  | 2.080095  |
| H | 4.801079  | -0.729521 | -0.919985 |

-----  
13-conf14

- Electronic Energy (Eh): -6700.78161212

- Cartesian Coordinates:

|    |           |           |           |
|----|-----------|-----------|-----------|
| Br | -4.656106 | -1.250332 | 2.108962  |
| C  | -3.382057 | -1.082207 | 0.711277  |
| C  | -2.233510 | -1.869103 | 0.767360  |
| C  | -1.263612 | -1.785708 | -0.230252 |
| C  | 0.017937  | -2.606577 | -0.209174 |
| C  | 0.054995  | -3.697372 | 0.864649  |
| C  | 1.238709  | -1.705954 | -0.090214 |
| C  | 2.341363  | -1.891560 | -0.923705 |
| C  | 3.477803  | -1.099949 | -0.787269 |
| Br | 4.937257  | -1.404310 | -1.962276 |
| C  | 3.551812  | -0.094152 | 0.190632  |
| N  | 4.715990  | 0.682304  | 0.291651  |
| C  | 4.977265  | 1.680664  | 1.172991  |
| C  | 6.377720  | 2.320007  | 0.986233  |
| F  | 6.249427  | 3.608080  | 0.704883  |
| F  | 7.073526  | 1.746951  | -0.008336 |
| F  | 7.081189  | 2.194524  | 2.101431  |
| O  | 4.262719  | 2.103782  | 2.047277  |
| C  | 2.440643  | 0.090197  | 1.026279  |
| C  | 1.310321  | -0.703426 | 0.880518  |
| C  | -1.486398 | -0.889784 | -1.282202 |
| C  | -2.627531 | -0.104384 | -1.348820 |
| C  | -3.604625 | -0.185782 | -0.344638 |
| N  | -4.776447 | 0.585090  | -0.359795 |
| C  | -5.165539 | 1.491358  | -1.292094 |
| C  | -6.529120 | 2.158259  | -0.974701 |
| F  | -6.368024 | 3.465942  | -0.836693 |
| F  | -7.379799 | 1.934946  | -1.964880 |
| F  | -7.077938 | 1.687825  | 0.156292  |
| O  | -4.584081 | 1.818297  | -2.296544 |
| H  | -2.113643 | -2.550365 | 1.609647  |
| H  | 0.081751  | -3.108144 | -1.189256 |
| H  | -0.799550 | -4.383838 | 0.768759  |
| H  | 0.978545  | -4.285566 | 0.769922  |
| H  | 0.044560  | -3.265905 | 1.877372  |
| H  | 2.322321  | -2.663741 | -1.695753 |

|   |           |           |           |
|---|-----------|-----------|-----------|
| H | 5.448109  | 0.461255  | -0.377021 |
| H | 2.480433  | 0.867524  | 1.785882  |
| H | 0.455738  | -0.525685 | 1.537950  |
| H | -0.738862 | -0.796292 | -2.074048 |
| H | -2.782406 | 0.584343  | -2.176112 |
| H | -5.405659 | 0.438926  | 0.424301  |

-----  
13-conf15

- Electronic Energy (Eh): -6700.78167738

- Cartesian Coordinates:

|    |           |           |           |
|----|-----------|-----------|-----------|
| Br | -4.751613 | -1.981604 | -1.175211 |
| C  | -3.343579 | -1.304919 | -0.096871 |
| C  | -2.227577 | -2.108665 | 0.116516  |
| C  | -1.162690 | -1.657640 | 0.895885  |
| C  | 0.036014  | -2.555174 | 1.165086  |
| C  | -0.076707 | -3.193439 | 2.552144  |
| C  | 1.340831  | -1.808674 | 0.922948  |
| C  | 1.601945  | -1.318765 | -0.362202 |
| C  | 2.767563  | -0.620896 | -0.638159 |
| Br | 3.050300  | 0.010467  | -2.405769 |
| C  | 3.727424  | -0.378260 | 0.363747  |
| N  | 4.891942  | 0.333529  | 0.039755  |
| C  | 5.924262  | 0.655602  | 0.859399  |
| C  | 7.057380  | 1.440427  | 0.149026  |
| F  | 8.179677  | 0.736144  | 0.183309  |
| F  | 7.259476  | 2.595278  | 0.764050  |
| F  | 6.772133  | 1.699789  | -1.136463 |
| O  | 6.047334  | 0.398982  | 2.031266  |
| C  | 3.465557  | -0.866807 | 1.647066  |
| C  | 2.291575  | -1.569331 | 1.913655  |
| C  | -1.251073 | -0.378837 | 1.452582  |
| C  | -2.361304 | 0.429769  | 1.247594  |
| C  | -3.434170 | -0.020360 | 0.464227  |
| N  | -4.576053 | 0.757197  | 0.219807  |
| C  | -4.846218 | 2.006849  | 0.675002  |
| C  | -6.213501 | 2.557783  | 0.193340  |
| F  | -6.977529 | 2.840702  | 1.237602  |
| F  | -6.028445 | 3.663279  | -0.512669 |
| F  | -6.875417 | 1.680873  | -0.577821 |
| O  | -4.161478 | 2.702374  | 1.382987  |
| H  | -2.194591 | -3.101900 | -0.336412 |
| H  | -0.000054 | -3.371762 | 0.424493  |
| H  | -1.014482 | -3.761616 | 2.627786  |
| H  | 0.758308  | -3.883316 | 2.745072  |
| H  | -0.089224 | -2.430824 | 3.345768  |
| H  | 0.875507  | -1.477275 | -1.162219 |
| H  | 4.961000  | 0.641705  | -0.925891 |
| H  | 4.194873  | -0.689574 | 2.434150  |
| H  | 2.133835  | -1.931856 | 2.930081  |
| H  | -0.425129 | 0.005733  | 2.056013  |
| H  | -2.414407 | 1.423513  | 1.686353  |
| H  | -5.281203 | 0.324485  | -0.369808 |

-----  
13-conf16

- Electronic Energy (Eh): -6700.78205157

- Cartesian Coordinates:

|    |           |           |           |
|----|-----------|-----------|-----------|
| Br | -2.636594 | -1.369159 | -1.939563 |
| C  | -2.541049 | 0.192006  | -0.863960 |
| C  | -1.394098 | 0.971599  | -0.930354 |
| C  | -1.272429 | 2.128323  | -0.155868 |
| C  | -0.038834 | 3.012146  | -0.269638 |
| C  | -0.158435 | 3.937478  | -1.483839 |
| C  | 1.237174  | 2.183148  | -0.238328 |
| C  | 1.524205  | 1.439727  | 0.912765  |
| C  | 2.661993  | 0.651306  | 0.989122  |
| Br | 2.983402  | -0.326172 | 2.584064  |
| C  | 3.566242  | 0.568457  | -0.087738 |
| N  | 4.703178  | -0.244271 | 0.032746  |

|   |           |           |           |
|---|-----------|-----------|-----------|
| C | 5.675980  | -0.454702 | -0.889418 |
| C | 6.785680  | -1.424916 | -0.408014 |
| F | 6.571368  | -1.867918 | 0.840630  |
| F | 7.959178  | -0.810926 | -0.427584 |
| F | 6.841080  | -2.477385 | -1.210590 |
| O | 5.760876  | 0.014775  | -1.996998 |
| C | 3.279135  | 1.311111  | -1.236667 |
| C | 2.133750  | 2.102735  | -1.302479 |
| C | -2.333087 | 2.470623  | 0.682573  |
| C | -3.486196 | 1.695205  | 0.757545  |
| C | -3.612128 | 0.536817  | -0.018490 |
| N | -4.748968 | -0.284584 | 0.018148  |
| C | -5.870164 | -0.119920 | 0.764258  |
| C | -6.927699 | -1.233068 | 0.547249  |
| F | -6.532923 | -2.145654 | -0.354149 |
| F | -7.158680 | -1.861867 | 1.690251  |
| F | -8.060817 | -0.698498 | 0.117615  |
| O | -6.116804 | 0.764767  | 1.545936  |
| H | -0.578192 | 0.664796  | -1.588189 |
| H | -0.021859 | 3.650821  | 0.629357  |
| H | -1.069831 | 4.546230  | -1.402377 |
| H | 0.703335  | 4.617614  | -1.555966 |
| H | -0.229421 | 3.363803  | -2.420666 |
| H | 0.839834  | 1.469638  | 1.763444  |
| H | 4.800695  | -0.730870 | 0.919318  |
| H | 3.965786  | 1.260584  | -2.078505 |
| H | 1.954264  | 2.665311  | -2.219419 |
| H | -2.264967 | 3.369140  | 1.301208  |
| H | -4.302728 | 1.974265  | 1.419493  |
| H | -4.720361 | -1.097318 | -0.590867 |

-----  
13-conf17

- Electronic Energy (Eh): -6700.78161256

- Cartesian Coordinates:

|    |           |           |           |
|----|-----------|-----------|-----------|
| Br | -4.937688 | -1.404897 | -1.961412 |
| C  | -3.477982 | -1.100448 | -0.786740 |
| C  | -2.341577 | -1.892093 | -0.923343 |
| C  | -1.238743 | -1.706390 | -0.090133 |
| C  | -0.017969 | -2.607001 | -0.209264 |
| C  | -0.054948 | -3.697902 | 0.864450  |
| C  | 1.263549  | -1.786074 | -0.230403 |
| C  | 2.233317  | -1.869226 | 0.767356  |
| C  | 3.381790  | -1.082231 | 0.711323  |
| Br | 4.655691  | -1.250001 | 2.109165  |
| C  | 3.604392  | -0.185961 | -0.344725 |
| N  | 4.776093  | 0.585126  | -0.359770 |
| C  | 5.165525  | 1.490806  | -1.292522 |
| C  | 6.528712  | 2.158402  | -0.974891 |
| F  | 7.379856  | 1.935092  | -1.964679 |
| F  | 7.077393  | 1.688653  | 0.156480  |
| F  | 6.367004  | 3.466043  | -0.837424 |
| O  | 4.584533  | 1.816949  | -2.297504 |
| C  | 2.627476  | -0.104853 | -1.349097 |
| C  | 1.486393  | -0.890347 | -1.282497 |
| C  | -1.310159 | -0.703794 | 0.880556  |
| C  | -2.440451 | 0.089829  | 1.026504  |
| C  | -3.551783 | -0.094556 | 0.191071  |
| N  | -4.715914 | 0.681946  | 0.292218  |
| C  | -4.976748 | 1.680861  | 1.173073  |
| C  | -6.376681 | 2.321123  | 0.985613  |
| F  | -7.074559 | 1.744755  | -0.005580 |
| F  | -7.078758 | 2.201431  | 2.102214  |
| F  | -6.247025 | 3.607875  | 0.698479  |
| O  | -4.261930 | 2.104202  | 2.047029  |
| H  | -2.322729 | -2.664370 | -1.695298 |
| H  | -0.081877 | -3.108495 | -1.189376 |
| H  | -0.978455 | -4.286150 | 0.769633  |
| H  | 0.799647  | -4.384296 | 0.768491  |
| H  | -0.044570 | -3.266573 | 1.877230  |

|   |           |           |           |
|---|-----------|-----------|-----------|
| H | 2.113345  | -2.550371 | 1.609720  |
| H | 5.405155  | 0.439334  | 0.424502  |
| H | 2.782370  | 0.583669  | -2.176543 |
| H | 0.738968  | -0.797104 | -2.074472 |
| H | -0.455454 | -0.526032 | 1.537820  |
| H | -2.480067 | 0.867199  | 1.786068  |
| H | -5.448419 | 0.460379  | -0.375868 |

-----  
13-conf18

- Electronic Energy (Eh): -6700.7820515

- Cartesian Coordinates:

|    |           |           |           |
|----|-----------|-----------|-----------|
| Br | -2.983941 | -0.322773 | 2.584377  |
| C  | -2.662291 | 0.652547  | 0.988159  |
| C  | -1.524393 | 1.440723  | 0.910842  |
| C  | -1.237174 | 2.182576  | -0.241208 |
| C  | 0.038947  | 3.011363  | -0.273538 |
| C  | 0.158823  | 3.934975  | -1.489026 |
| C  | 1.272462  | 2.127595  | -0.158353 |
| C  | 1.393947  | 0.969467  | -0.930778 |
| C  | 2.540873  | 0.189947  | -0.863162 |
| Br | 2.636199  | -1.373152 | -1.935969 |
| C  | 3.612115  | 0.536239  | -0.018504 |
| N  | 4.748972  | -0.285090 | 0.019272  |
| C  | 5.870456  | -0.118957 | 0.764631  |
| C  | 6.929015  | -1.231123 | 0.547566  |
| F  | 7.169490  | -1.852021 | 1.692752  |
| F  | 8.057916  | -0.696496 | 0.106604  |
| F  | 6.530321  | -2.150250 | -0.345420 |
| O  | 6.117163  | 0.767009  | 1.544848  |
| C  | 3.486360  | 1.696020  | 0.755473  |
| C  | 2.333272  | 2.471350  | 0.679298  |
| C  | -2.133696 | 2.100873  | -1.305315 |
| C  | -3.279193 | 1.309497  | -1.238536 |
| C  | -3.566477 | 0.568392  | -0.088647 |
| N  | -4.703513 | -0.244043 | 0.032789  |
| C  | -5.676417 | -0.455342 | -0.889089 |
| C  | -6.786239 | -1.424849 | -0.406559 |
| F  | -7.959707 | -0.810842 | -0.427257 |
| F  | -6.841468 | -2.478451 | -1.207663 |
| F  | -6.572199 | -1.866084 | 0.842752  |
| O  | -5.761267 | 0.012854  | -1.997215 |
| H  | -0.840089 | 1.471665  | 1.761537  |
| H  | 0.021945  | 3.651317  | 0.624544  |
| H  | -0.702842 | 4.615127  | -1.562216 |
| H  | 1.070291  | 4.543716  | -1.408312 |
| H  | 0.229849  | 3.359959  | -2.425024 |
| H  | 0.577923  | 0.661524  | -1.587929 |
| H  | 4.719809  | -1.099384 | -0.587627 |
| H  | 4.303020  | 1.976201  | 1.416787  |
| H  | 2.265314  | 3.370984  | 1.296321  |
| H  | -1.954088 | 2.662225  | -2.222977 |
| H  | -3.965785 | 1.257984  | -2.080359 |
| H  | -4.801260 | -0.729373 | 0.920032  |

-----  
13-conf19

- Electronic Energy (Eh): -6700.78195013

- Cartesian Coordinates:

|    |           |           |           |
|----|-----------|-----------|-----------|
| Br | 4.414738  | 1.849408  | 1.466921  |
| C  | 3.205847  | 1.287380  | 0.115058  |
| C  | 2.085983  | 2.076823  | -0.138441 |
| C  | 1.163863  | 1.711442  | -1.117896 |
| C  | -0.089051 | 2.520921  | -1.417801 |
| C  | -0.132902 | 3.894933  | -0.743226 |
| C  | -1.346649 | 1.730391  | -1.086237 |
| C  | -1.456367 | 1.038161  | 0.122463  |
| C  | -2.623741 | 0.360230  | 0.447326  |
| Br | -2.701161 | -0.564131 | 2.103567  |
| C  | -3.728020 | 0.345509  | -0.424939 |

|   |           |           |           |
|---|-----------|-----------|-----------|
| N | -4.884762 | -0.357366 | -0.055817 |
| C | -6.041791 | -0.480109 | -0.753860 |
| C | -7.116194 | -1.329974 | -0.027216 |
| F | -7.468119 | -2.355568 | -0.787270 |
| F | -8.187967 | -0.588364 | 0.212337  |
| F | -6.678797 | -1.814331 | 1.145502  |
| O | -6.309602 | -0.012374 | -1.832727 |
| C | -3.614073 | 1.038490  | -1.636111 |
| C | -2.440406 | 1.716127  | -1.951617 |
| C | 1.405542  | 0.532580  | -1.832750 |
| C | 2.518608  | -0.258433 | -1.590188 |
| C | 3.446756  | 0.106308  | -0.602579 |
| N | 4.588113  | -0.655801 | -0.312822 |
| C | 4.985900  | -1.815106 | -0.895703 |
| C | 6.310200  | -2.375752 | -0.315419 |
| F | 7.224772  | -2.447038 | -1.271230 |
| F | 6.801639  | -1.608741 | 0.670399  |
| F | 6.108250  | -3.589697 | 0.173915  |
| O | 4.439958  | -2.425623 | -1.780593 |
| H | 1.949787  | 2.985839  | 0.447378  |
| H | -0.098113 | 2.689427  | -2.507582 |
| H | 0.748730  | 4.498931  | -1.005189 |
| H | -1.030310 | 4.441795  | -1.064790 |
| H | -0.181363 | 3.803844  | 0.352870  |
| H | -0.615762 | 1.015077  | 0.819084  |
| H | -4.841463 | -0.828194 | 0.843393  |
| H | -4.456555 | 1.034119  | -2.323825 |
| H | -2.382249 | 2.247068  | -2.905223 |
| H | 0.695198  | 0.216692  | -2.600992 |
| H | 2.688792  | -1.170329 | -2.157895 |
| H | 5.182794  | -0.288725 | 0.424676  |

-----  
13-conf20

- Electronic Energy (Eh): -6700.78168793

- Cartesian Coordinates:

|    |           |           |           |
|----|-----------|-----------|-----------|
| Br | -4.755162 | -2.002011 | -1.127538 |
| C  | -3.344312 | -1.301851 | -0.068027 |
| C  | -2.230531 | -2.103171 | 0.165166  |
| C  | -1.163831 | -1.635542 | 0.932162  |
| C  | 0.031849  | -2.529996 | 1.224790  |
| C  | -0.083722 | -3.132461 | 2.627560  |
| C  | 1.338691  | -1.793337 | 0.965147  |
| C  | 1.613957  | -1.359155 | -0.336877 |
| C  | 2.780588  | -0.669414 | -0.628843 |
| Br | 3.083531  | -0.115815 | -2.419006 |
| C  | 3.726763  | -0.378839 | 0.373267  |
| N  | 4.891834  | 0.324470  | 0.033141  |
| C  | 5.906507  | 0.697749  | 0.853049  |
| C  | 7.032125  | 1.479986  | 0.128077  |
| F  | 7.115987  | 2.706679  | 0.622820  |
| F  | 6.815490  | 1.581493  | -1.192514 |
| F  | 8.192476  | 0.867815  | 0.306175  |
| O  | 6.013668  | 0.497559  | 2.037426  |
| C  | 3.451025  | -0.812469 | 1.673355  |
| C  | 2.276530  | -1.507760 | 1.955904  |
| C  | -1.247914 | -0.342519 | 1.455638  |
| C  | -2.355941 | 0.463817  | 1.230784  |
| C  | -3.430861 | -0.003153 | 0.460209  |
| N  | -4.570902 | 0.771054  | 0.197263  |
| C  | -4.839409 | 2.030810  | 0.624775  |
| C  | -6.206388 | 2.572430  | 0.131807  |
| F  | -6.972035 | 2.872744  | 1.170074  |
| F  | -6.021260 | 3.665698  | -0.592853 |
| F  | -6.866669 | 1.681809  | -0.624917 |
| O  | -4.153793 | 2.740849  | 1.317357  |
| H  | -2.200932 | -3.107861 | -0.261972 |
| H  | -0.006180 | -3.364830 | 0.505057  |
| H  | -1.020592 | -3.700414 | 2.715184  |
| H  | 0.752489  | -3.814965 | 2.840545  |



|   |           |           |           |
|---|-----------|-----------|-----------|
| H | -0.100572 | -2.349788 | 3.401281  |
| H | 0.898003  | -1.555380 | -1.137994 |
| H | 4.978094  | 0.579456  | -0.946568 |
| H | 4.169936  | -0.598101 | 2.460747  |
| H | 2.107653  | -1.827116 | 2.984976  |
| H | -0.420453 | 0.055091  | 2.048423  |
| H | -2.405798 | 1.468561  | 1.644105  |
| H | -5.276752 | 0.326420  | -0.382555 |
