# Supplementary material
Source: PubMed Central journal article supplement (PMC10591928)
Supplement: NIHMS1936295-supplement-Supporting_Information.pdf [file NIHMS1936295-supplement-Supporting_Information.pdf]

## Supporting Information

### **An Asymmetric Aromatic Finkelstein Reaction: A Platform for Remote Diarylmethane Desymmetrization**

Tobias Morack<sup>a</sup>, Tyler E. Myers<sup>a</sup>, Lucas J. Karas<sup>b</sup>, Melissa A. Hardy<sup>b</sup>, Brandon Q. Mercado<sup>a</sup>,  
Matthew S. Sigman<sup>b\*</sup>, Scott J. Miller<sup>a\*</sup>

<sup>a</sup>Department of Chemistry, Yale University, New Haven, Connecticut 06520 – 8170, United States

<sup>b</sup>Department of Chemistry, University of Utah, 315 South 1400 East, Salt Lake City, Utah 84112, United States

## Table of Contents

|      |                                                                                                             |    |
|------|-------------------------------------------------------------------------------------------------------------|----|
| 1.   | General Information .....                                                                                   | 3  |
| 2.   | Catalyst Synthesis and Characterization .....                                                               | 6  |
| 2.1. | Representative Synthetic Procedure for TMG-Peptides.....                                                    | 6  |
| 2.2. | Characterization of TMG-Peptides.....                                                                       | 7  |
| 3.   | Synthesis and Characterization of Starting Materials .....                                                  | 11 |
| 4.   | Reaction Optimization.....                                                                                  | 19 |
| 5.   | Preparation and Characterization of Products .....                                                          | 22 |
| 5.1  | Preparation and Characterization of <b>2</b> .....                                                          | 22 |
| 5.2  | Preparation and Characterization of Asymmetric Aromatic Finkelstein / Heck Sequence Products .....          | 24 |
| 5.3  | Preparation and Characterization of Asymmetric Aromatic Finkelstein / Larock Sequence Product .....         | 34 |
| 5.4  | Preparation and Characterization of Asymmetric Aromatic Finkelstein / Suzuki Sequence Product .....         | 36 |
| 5.5  | Preparation and Characterization of Asymmetric Aromatic Finkelstein / Dehalogenation Sequence Product ..... | 38 |
| 5.6  | Preparation and Characterization of Asymmetric Aromatic Finkelstein / Carbonylation Sequence Product .....  | 40 |
| 6.   | Mechanistic Studies.....                                                                                    | 43 |
| 6.1. | Reaction Progress Monitoring.....                                                                           | 43 |
| 6.2. | Origin of Induction Period.....                                                                             | 43 |
| 6.3. | Correlation of <sup>13</sup> C NMR Shift with Enantioselectivity .....                                      | 44 |
| 7.   | Computational Details .....                                                                                 | 45 |
| 8.   | X-Ray Crystallography.....                                                                                  | 48 |
| 9.   | NMR Spectra .....                                                                                           | 51 |
| 10.  | References .....                                                                                            | 84 |

## 1. General Information

Room temperature is defined as 21–23 °C. The following reagents,  $\text{Cu}(\text{MeCN})_4\text{BF}_4$  (>98%, TCI America),  $\text{Cs}_2\text{CO}_3$  (99.995%, Acros),  $\text{K}_3\text{PO}_4$  (>98%, Sigma Aldrich), were purchased from the corresponding commercial suppliers and used as received unless stated otherwise. All other reagents were purchased from commercial suppliers and used without further purification, unless otherwise noted. Acetonitrile, *N,N*-dimethylformamide, dichloromethane, tetrahydrofuran, and toluene were obtained from a Seca Solvent System by GlassContour, in which the solvent was dried over alumina and dispensed under an atmosphere of Ar. All other solvents were purchased from commercial suppliers and used without further purification, unless otherwise noted.

### Analytical Methods:

*Thin-layer chromatography:* Analytical thin-layer chromatography (TLC) was performed using EMD Millipore silica gel 60 F254 precoated plates (0.25 mm thickness) and developed plates were visualized under a UV lamp.  $R_f$  values are reported.

*Column chromatography:* Normal phase flash column chromatography was conducted on an automated Biotage® Isolera™ One purification system equipped with a 10, 25, 50 or 100 g SNAP Ultra (HP Sphere, 25  $\mu\text{m}$  silica) cartridge or using 60 Å Silica Gel (32–62 micron) with an appropriate mobile phase composition and gradient. Reversed phase flash column chromatography was performed using an automated Biotage® Isolera™ One purification system equipped with a 12, 30, 60 or 120 g SNAP Ultra C18 cartridge. The desired fractions were analyzed by TLC or UPLC/MS, collected, and concentrated under reduced pressure to afford the product.

*NMR:* Routine  $^1\text{H}$  NMR spectra were recorded on Agilent 400, 500, or 600 MHz spectrometers at ambient temperature unless otherwise stated. All NMR solvents were purchased from Cambridge Isotope Laboratories and used without further purification. Deuterated solvents were stored at ambient temperature and were used immediately after opening. Spectra were processed using MestReNova 14.2.0 using the automatic phasing and polynomial baseline correction capabilities. Splitting was determined using the automatic multiplet analysis function with manual intervention as necessary. Spectral data are reported as follows: chemical shift (multiplicity [singlet (s), broad singlet (brs), doublet (d), triplet (t), quartet (q), pentet (p), multiplet (m), doublet of doublets (dd), doublet of doublet of doublets (ddd), doublet of triplet of doublets (dtd), doublet of doublet of doublet of doublets (dddd), doublet of triplets (dt), triplet of doublets (td), etc.], coupling constant, integration). Chemical shifts are reported in ppm ( $\delta$ ), and coupling constants are reported in Hz.  $^1\text{H}$  Resonances are referenced to solvent residual peaks for  $\text{CDCl}_3$  (7.26 ppm),  $\text{D}_2\text{O}$  (4.79 ppm), or  $\text{CD}_3\text{OD}$  (3.31 ppm).<sup>1</sup> Routine  $^{13}\text{C}$  NMR spectra were recorded on Agilent 400, 500, or 600 MHz spectrometers with protons fully decoupled.  $^{13}\text{C}$  Resonances are reported in ppm relative to solvent residual peaks for  $\text{CDCl}_3$  (77.2 ppm) or  $\text{CD}_3\text{OD}$  (49.0 ppm).<sup>1</sup>  $^{19}\text{F}$  NMR spectra were obtained on Agilent 400 (376) MHz or 500 (471) MHz spectrometers without proton decoupling.  $^{19}\text{F}$  data are reported as chemical shift, multiplicity, coupling constant (Hz) and integration (where applicable). Note: Small deviations in chemical shifts may be observed depending on the concentration of NMR samples.

*IR:* Infrared spectra were recorded on a Nicolet 6700 ATR/FT-IR spectrometer, and  $\nu_{\text{max}}$  are partially reported in  $\text{cm}^{-1}$ .

*Mass spectrometry:* Ultra high-performance liquid chromatography/mass spectrometry (UPLC/MS) and low-resolution mass spectrometry (LRMS) were performed on a Waters Acquity SQD2 instrument equipped with an Ultra BEH C18 column (1.7  $\mu\text{m}$ , 2.1 x 50 mm), a dual atmospheric pressure chemical ionization (API)/electrospray ionization (ESI) mass spectrometry detector and a photodiode array detector. High-resolution mass spectrometry (HRMS) was conducted by the Chemical and Biophysical Instrumentation Center (CBIC) at Yale University and was performed on a Waters Xevo Q-TOF high-resolution mass spectrometer using ESI.

*Optical rotation:* Optical rotations were recorded on an Autopol VI Automatic Polarimeter at the sodium D-line (589 nm), using a Type 40T TempTrol<sup>TM</sup> cell of 0.50 dm path length at 20 °C and reported as follows:  $[\alpha]_{\lambda}$  temp, enantiomeric ratio, concentration (c, in g/100 mL), and solvent.

*Analytical HPLC:* Analytical normal phase highperformance liquid chromatography (HPLC) was performed using an Agilent 1100 series instrument equipped with a photodiode array detector (210, 230, 254, and 280 nm) and chiral columns (5  $\mu\text{m}$ , 4.6 x 250 mm) from Daicel Chemical Industries.

#### **Abbreviations:**

|                    |                                                                 |
|--------------------|-----------------------------------------------------------------|
| Acpc               | 1-Aminocyclopropane-1-carboxylic acid                           |
| Aib                | $\alpha$ -Aminoisobutyric acid                                  |
| Asp                | Aspartic acid                                                   |
| Boc                | <i>t</i> -Butoxycarbonyl                                        |
| CDCl <sub>3</sub>  | Chloroform- <i>d</i>                                            |
| CD <sub>3</sub> CN | Acetonitrile- <i>d</i> <sub>3</sub>                             |
| Chg                | Cyclohexylglycine                                               |
| CV                 | Column volume                                                   |
| DCM                | Dichloromethane                                                 |
| DIPEA              | <i>N,N</i> -Diisopropylethylamine                               |
| DMF                | <i>N,N'</i> -dimethylformamide                                  |
| EDC                | <i>N</i> -(3-Dimethylaminopropyl)- <i>N'</i> -ethylcarbodiimide |
| er                 | Enantiomeric ratio                                              |
| equiv.             | Equivalents                                                     |
| EtOAc              | Ethyl acetate                                                   |
| h                  | Hours                                                           |
| HATU               | Hexafluorophosphate azabenzotriazole tetramethyl uronium        |
| Hex                | Hexanes                                                         |
| HOBt               | 1-Hydroxybenzotriazole                                          |
| HPLC               | High-performance liquid chromatography                          |
| HRMS               | High-resolution mass spectrometry                               |
| IPA                | Isopropyl alcohol                                               |
| LCMS               | Liquid chromatography mass spectrometry                         |
| Leu                | Leucine                                                         |
| <i>t</i> -Leu      | <i>t</i> -Leucine                                               |
| NaI                | 1-Naphtylalanine                                                |

|      |                                        |
|------|----------------------------------------|
| NBS  | <i>N</i> -Bromosuccinimide             |
| Neo  | <i>Neo</i> -pentylalanine              |
| NMR  | Nuclear magnetic resonance             |
| Phe  | Phenylalanine                          |
| Pro  | Proline                                |
| r.t. | Room temperature                       |
| TFA  | Trifluoroacetic acid, trifluoroacetate |
| THF  | Tetrahydrofuran                        |
| TLC  | Thin-layer chromatography              |
| TMG  | Tetramethylguanidine                   |
| Tol  | Toluene                                |
| Val  | Valine                                 |



stirred at r.t. for 1 h. Concentration *in vacuo* and co-evaporation with CH<sub>2</sub>Cl<sub>2</sub> (3x) yielded an off-white foam, which was used in the next step without further purification.

### Peptide Coupling #3

A round bottom flask with stir bar was charged with crude H-<sup>D</sup>Pro-Acpc-*t*Leu-OMe (assumed 10.0 mmol, 1.00 equiv.), Boc-Asp-OBzl (3.56 g, 11.0 mmol, 1.10 equiv.), EDC • HCl (2.11 g, 11.0 mmol, 1.10 equiv.) and HOBt • H<sub>2</sub>O (1.68 g, 11.0 mmol, 1.10 equiv.), before CH<sub>2</sub>Cl<sub>2</sub> (50 mL) was added. After addition of DIPEA (3.74 mL, 22.0 mmol, 2.20 equiv.), the reaction mixture was stirred at r.t. for 3 h. The reaction was washed with 10% citric acid (aq.) (2x) and sat. NaHCO<sub>3</sub> (aq.) (2x). The organic layer was dried over MgSO<sub>4</sub> and concentrated *in vacuo* and the crude material was purified by automated reverse phase chromatography (Biotage, SNAP Ultra C18 120 g, gradient MeCN in H<sub>2</sub>O: 1 CV: 0-10%; 15 CV: 10-60% 1 CV: 60-100%) to give Boc-Asp(OBn)-<sup>D</sup>Pro-Acpc-*t*Leu-OMe as a white foam (2.00 g).

### Boc Deprotection #3

Boc-Asp(OBn)-<sup>D</sup>Pro-Acpc-*t*Leu-OMe (2.00 g, 3.17 mmol, 1.00 equiv.) was treated with HCl solution (4 M in 1,4-dioxane, 3.98 mL, 15.9 mmol, 5.00 equiv.) and a minimal amount of CH<sub>2</sub>Cl<sub>2</sub> and the resulting mixture was stirred at r.t. for 2 h. Concentration *in vacuo* and co-evaporation with CH<sub>2</sub>Cl<sub>2</sub> (3x) yielded an off-white foam, which was used in the next step without further purification.

### Guanidinylation

In a round bottom flask with stir bar crude H-Asp(OBn)-<sup>D</sup>Pro-Acpc-*t*Leu-OMe (assumed 3.17 mmol, 1.00 equiv.) was dissolved in MeCN (32 mL). Following addition of HBTU (1.98 g, 5.22 mmol, 1.65 equiv.) and Et<sub>3</sub>N (2.20 mL, 15.9 mmol, 5.00 equiv.), the reaction mixture was stirred at r.t. for 22 h. The reaction was diluted with CH<sub>2</sub>Cl<sub>2</sub>, washed with sat. NaHCO<sub>3</sub> (aq.) (2x) and 10% citric acid (aq.) (2x). The organic layer was dried over NaSO<sub>4</sub> and concentrated *in vacuo* and the crude material was purified by automated reverse phase chromatography (Biotage, SNAP Ultra C18 120 g, gradient MeCN in H<sub>2</sub>O: 16 CV: 0-45%) to give TMG-Asp(OBn)-<sup>D</sup>Pro-Acpc-*t*Leu-OMe • PF<sub>6</sub> as a white foam (1.10 g).

### Ester Hydrolysis

TMG-Asp(OBn)-<sup>D</sup>Pro-Acpc-*t*Leu-OMe (1.10 g, 1.42 mmol, 1.00 equiv.) was dissolved in 1:1 MeOH/H<sub>2</sub>O (14 mL) and LiOH • H<sub>2</sub>O (0.13 g, 3.12 mmol, 2.20 mmol) was added. The reaction mixture was stirred at r.t. for 24 h before being concentrated and purified by automated reverse phase chromatography (Biotage, SNAP Ultra C18 120 g, gradient MeCN in H<sub>2</sub>O: 2 CV: 0%; 13 CV: 0-27%) to give TMG-Asp-<sup>D</sup>Pro-Acpc-*t*Leu-OLi as a white foam.

## 2.2. Characterization of TMG-Peptides

The following TMG-peptides were reported previously: TMG-Asp-<sup>D</sup>Pro-Aib-OLi (**L1**)<sup>2</sup>, TMG-Gly-OLi (**L2**)<sup>2</sup>, TMG-<sup>D</sup>Asp- $\alpha$ MePro-OLi (**L6**)<sup>3</sup>, TMG-Asp-<sup>D</sup>Pro-Acpc-OLi (**L7**)<sup>4</sup>, TMG-Asp-<sup>D</sup>Pro-Aib-Val-OLi (**L14**)<sup>5</sup>, TMG-Asp-<sup>D</sup>Pro-Aib-<sup>D</sup>Leu-OLi (**L15**)<sup>4</sup>.

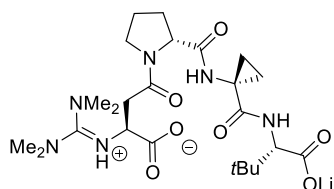

**TMG-Asp-<sup>D</sup>Pro-Acpc-tLeu-OLi (L10)** was prepared according to the Representative Synthetic Procedure for TMG-Peptides and obtained as a white foam (0.53 g, 1.00 mmol, 10% over 8 steps).

**<sup>1</sup>H NMR** (400 MHz, CD<sub>3</sub>OD) δ 4.35 (dd, *J* = 8.5, 4.5 Hz, 1H), 4.22 (dd, *J* = 9.4, 3.5 Hz, 1H), 4.09 (s, 1H), 3.75 – 3.67 (m, 1H), 3.64 – 3.54 (m, 1H), 3.06 – 2.79 (m, 14H), 2.41 – 2.26 (m, 1H), 2.18 – 1.89 (m, 3H), 1.55 (ddd, *J* = 11.1, 7.3, 3.8 Hz, 1H), 1.32 – 1.24 (m, 1H), 1.13 – 0.92 (m, 11H).

**<sup>13</sup>C NMR** (101 MHz, CD<sub>3</sub>OD) δ 177.2, 176.9, 176.0, 172.5, 171.4, 163.8, 64.7, 61.6, 57.9, 48.7, 40.1, 38.3, 35.8, 31.1, 27.7, 27.7, 25.8, 17.3, 16.6.

**HRMS** (ESI/Q-TOF): Exact mass calculated for [C<sub>24</sub>H<sub>40</sub>N<sub>6</sub>O<sub>7</sub> + H]<sup>+</sup>; requires *m/z* = 525.3031, found *m/z* = 525.3037.

**IR** (FT-ATR, cm<sup>-1</sup>, thin film) *v*<sub>max</sub> = 3397(bm), 3261(bm), 2965(w), 2910(bw), 1605(bs), 1526(m), 1405(s), 1309(m), 1234(w), 1206(w), 1168(w), 1069(w), 1035(w), 841(s), 557(s).

**Optical:** [α]<sub>D</sub><sup>20</sup> = +49.9 (*c* = 1.0, MeOH).

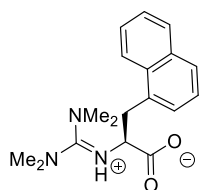

**TMG-1NaI-OH (L3)** was prepared according to the Representative Synthetic Procedure for TMG-Peptides and obtained as a white foam.

**LRMS** (ESI): Exact mass calculated for [C<sub>18</sub>H<sub>23</sub>N<sub>3</sub>O<sub>2</sub> + H]<sup>+</sup>; requires *m/z* = 314.19, found *m/z* = 314.82.

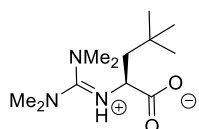

**TMG-Neo-OH (L4)** was prepared according to the Representative Synthetic Procedure for TMG-Peptides and obtained as a white foam.

**LRMS** (ESI): Exact mass calculated for [C<sub>12</sub>H<sub>25</sub>N<sub>3</sub>O<sub>2</sub> + H]<sup>+</sup>; requires *m/z* = 244.20, found *m/z* = 244.34.



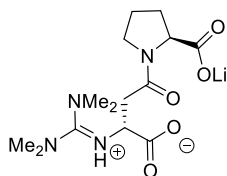

**TMG-<sup>D</sup>Asp-Pro-OLi (L5)** was prepared according to the Representative Synthetic Procedure for TMG-Peptides and obtained as a white foam.

**LRMS (ESI):** Exact mass calculated for  $[C_{14}H_{24}N_4O_5 + H]^+$ ; requires  $m/z = 329.18$ , found  $m/z = 329.41$ .

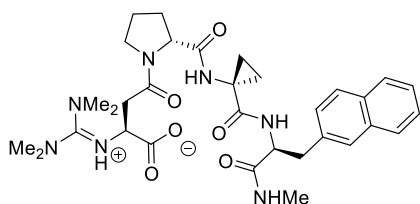

**TMG-Asp-<sup>D</sup>Pro-Acpc-2NaI-NHMe (L8)** was prepared according to the Representative Synthetic Procedure for TMG-Peptides and obtained as a white foam.

**LRMS (ESI):** Exact mass calculated for  $[C_{32}H_{44}N_7O_6 + H]^+$ ; requires  $m/z = 622.33$ , found  $m/z = 622.71$ .

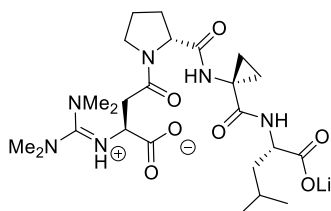

**TMG-Asp-<sup>D</sup>Pro-Acpc-Leu-OLi (L9)** was prepared according to the Representative Synthetic Procedure for TMG-Peptides and obtained as a white foam.

**LRMS (ESI):** Exact mass calculated for  $[C_{24}H_{40}N_6O_7 + H]^+$ ; requires  $m/z = 525.30$ , found  $m/z = 525.51$ .

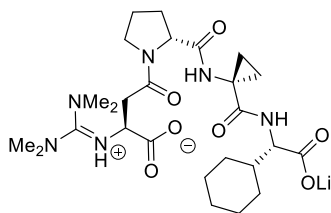

**TMG-Asp-<sup>D</sup>Pro-Acpc-Chg-OLi (L11)** was prepared according to the Representative Synthetic Procedure for TMG-Peptides and obtained as a white foam.

**LRMS (ESI):** Exact mass calculated for  $[C_{26}H_{42}N_6O_7 + H]^+$ ; requires  $m/z = 551.32$ , found  $m/z = 551.50$ .

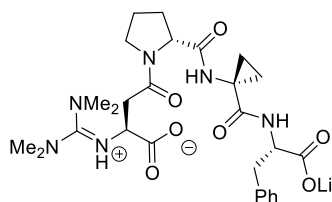

**TMG-Asp-<sup>D</sup>Pro-Acpc-Phe-OLi (L12)** was prepared according to the Representative Synthetic Procedure for TMG-Peptides and obtained as a white foam.

**LRMS (ESI):** Exact mass calculated for  $[C_{27}H_{38}N_6O_7 + H]^+$ ; requires  $m/z = 559.29$ , found  $m/z = 559.48$ .

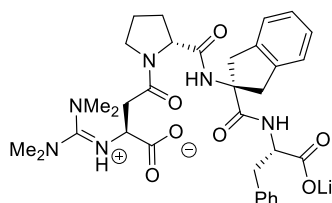

**TMG-Asp-<sup>D</sup>Pro-Aic-Phe-OLi (L13)** was prepared according to the Representative Synthetic Procedure for TMG-Peptides and obtained as a white foam.

**LRMS (ESI):** Exact mass calculated for  $[C_{33}H_{42}N_6O_7 + H]^+$ ; requires  $m/z = 635.31$ , found  $m/z = 636.02$ .

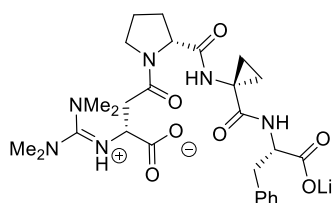

**TMG-<sup>D</sup>Asp-<sup>D</sup>Pro-Acpc-Phe-OLi (L16)** was prepared according to the Representative Synthetic Procedure for TMG-Peptides and obtained as a white foam.

**LRMS (ESI):** Exact mass calculated for  $[C_{27}H_{38}N_6O_7 + H]^+$ ; requires  $m/z = 559.29$ , found  $m/z = 559.48$ .

### 3. Synthesis and Characterization of Starting Materials

The following diarylmethines have been reported previously and were prepared according to literature procedures:

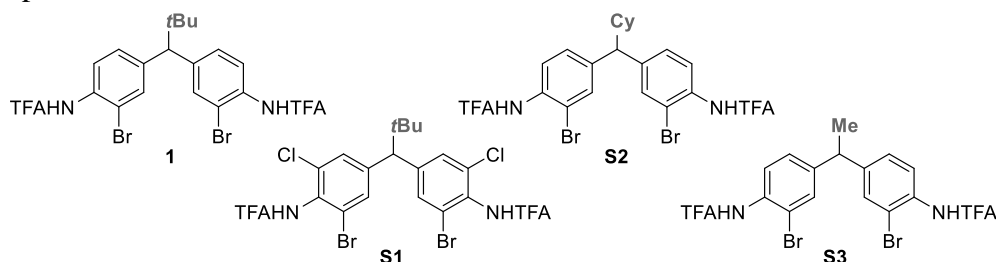

**Figure S1:** Previously prepared diarylmethines **1**<sup>2</sup>, **S1**<sup>2</sup>, **S2**<sup>2</sup>, **S3**<sup>2</sup>.

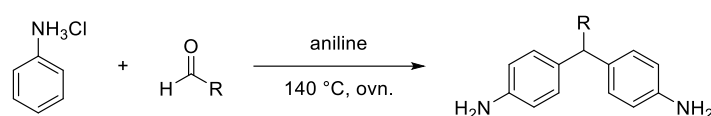

#### General Procedure A (GP A) for the synthesis of bis-amino diarylmethines:

A pressure tube equipped with a stir bar was charged with aniline hydrochloride (1.00 equiv.). Subsequently, aniline (3.00 equiv.) and the respective aldehyde (1.00 equiv.) were added, the tube was sealed and heated at 140 °C for 16-20 h. The reaction was cooled to r.t., diluted with CH<sub>2</sub>Cl<sub>2</sub> and 5 M NaOH (aq.) was carefully added. The aqueous layer was extracted with CH<sub>2</sub>Cl<sub>2</sub> (3x) and the combined organic layers were dried over MgSO<sub>4</sub>, before being concentrated *in vacuo*. The crude material was purified by column chromatography (SiO<sub>2</sub>, hexanes/EtOAc).

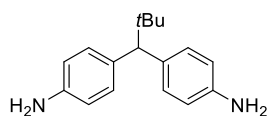

**4,4'-(2,2-Dimethylpropane-1,1-diyl)dianiline (S4)** was prepared following **GP A**. Reaction of aniline hydrochloride (2.59 g, 20.0 mmol, 1.00 equiv.) with aniline (5.43 mL, 60.0 mmol, 3.00 equiv.) and pivaldehyde (2.17 mL, 20.0 mmol, 1.00 equiv.) followed by purification via column chromatography (SiO<sub>2</sub>, hexanes/EtOAc 1:1 → 0:1) yielded **S4** as a light-brown foam (3.32 g, 13.1 mmol, 65%). Analytical data are in agreement with literature.<sup>2</sup>

**R<sub>F</sub>**: 0.60 (EtOAc)

**<sup>1</sup>H NMR** (400 MHz, CDCl<sub>3</sub>) δ 7.18 (d, *J* = 8.4 Hz, 4H), 6.59 (d, *J* = 8.4 Hz, 4H), 3.50 (s, 4H), 0.98 (s, 9H).

**HRMS** (ESI/Q-TOF): Exact mass calculated for [C<sub>17</sub>H<sub>22</sub>N<sub>2</sub> + H]<sup>+</sup>; requires *m/z* = 255.1864. Found 255.1861.

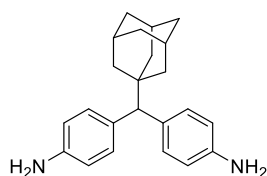

**4,4'-(((3r,5r,7r)-Adamantan-1-yl)methylene)dianiline (S5)** was prepared following **GP A**. Reaction of aniline hydrochloride (803 mg, 6.20 mmol, 1.00 equiv.) with aniline (1.69 mL, 18.6 mmol, 3.00 equiv.) and adamantane-1-carbaldehyde (1.02 mL, 6.20 mmol, 1.00 equiv.)

followed by purification via column chromatography (SiO<sub>2</sub>, hexanes/EtOAc 8:2 → 6:4) yielded **S5** as a maroon solid (1.02 g, 3.07 mmol, 50%).

**R<sub>F</sub>**: 0.34 (hexanes/EtOAc 6:4)

**<sup>1</sup>H NMR** (400 MHz, d<sup>6</sup>-DMSO) δ 7.02 (d, *J* = 8.2 Hz, 4H), 6.45 (d, *J* = 8.2 Hz, 4H), 4.80 (bs, 4H), 3.11 (s, 1H), 1.87 (bs, 3H), 1.66–1.38 (m, 12H).

**<sup>13</sup>C NMR** (101 MHz, d<sup>6</sup>-DMSO) δ 146.3, 130.2, 130.1, 113.4, 63.8, 40.6, 36.6, 36.2, 28.2.

**HRMS** (ESI/Q-TOF): Exact mass calculated for [C<sub>23</sub>H<sub>28</sub>N<sub>2</sub> + H]<sup>+</sup>; requires *m/z* = 333.2325. Found 333.2310 (ESI+).

**IR** (FT-ATR, cm<sup>-1</sup>, thin film) *v*<sub>max</sub> = 3428(w), 3347(w), 2897(s), 2845(s), 1612(s), 1508(s), 1445(m), 1269(s), 1179(m), 1128(m), 1105(m), 978(w), 814(s), 518(s).

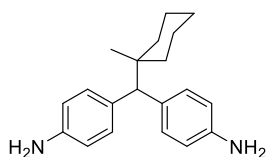

**4,4'-((1-Methylcyclohexyl)methylene)dianiline (**S6**)** was prepared following **GP A**. Reaction of aniline hydrochloride (972 mg, 7.50 mmol, 1.00 equiv.) with aniline (2.03 mL, 22.5 mmol, 3.00 equiv.) and 1-methylcyclohexyl carbaldehyde (1.04 mL, 7.50 mmol, 1.00 equiv.) followed by purification via automated column chromatography (Biotage, SNAP Ultra 100 g, gradient EtOAc in hexanes: 10 CV: 20-100%; 13 CV: 100%) yielded **S6** as a brown foam (996 mg, 3.36 mmol, 48%).

**R<sub>F</sub>**: 0.64 (EtOAc)

**<sup>1</sup>H NMR** (400 MHz, CDCl<sub>3</sub>) δ 7.20 (d, *J* = 8.4 Hz, 4H), 6.59 (d, *J* = 8.4 Hz, 4H), 3.59 (s, 1H), 3.49 (s, 4H), 1.52 (d, *J* = 10.6 Hz, 3H), 1.43 – 1.25 (m, 6H), 1.26 – 1.12 (m, 1H), 1.04 (s, 3H).

**<sup>13</sup>C NMR** (101 MHz, CDCl<sub>3</sub>) δ 144.1, 133.5, 130.9, 114.9, 53.6, 37.5, 37.2, 26.3, 22.2, 21.5.

**HRMS** (ESI/Q-TOF): Exact mass calculated for [C<sub>20</sub>H<sub>26</sub>N<sub>2</sub> + H]<sup>+</sup>; requires *m/z* = 295.2169, found *m/z* = 295.2149.

**IR** (FT-ATR, cm<sup>-1</sup>, thin film) *v*<sub>max</sub> = 3345(bw), 3214(w), 2973(w), 2922(m), 2859(m), 1734(m), 1617(s), 1510(s), 1449(m), 1376(w), 1273(s), 1215(m), 1180(bs), 1132(s), 1052(w), 902(w), 748(s), 667(s).

#### ***N,N'*-(Carbonylbis(4,1-phenylene))bis(2,2-dimethylpropanamide) (**S7**)**

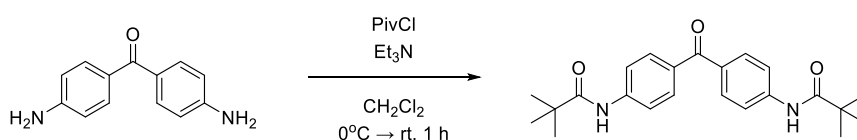

A 500 mL round-bottom flask equipped with a stir bar was charged with 4,4'-diaminobenzophenone (5.31 g, 25.0 mmol, 1.00 equiv) and CH<sub>2</sub>Cl<sub>2</sub> (125 mL, 0.20 M). The resulting tan suspension was immersed in an ice bath followed by the addition of triethylamine (10.5 mL, 75.0 mmol, 3.00 equiv) and dropwise addition of pivaloyl chloride (6.70 mL, 55.0 mmol, 2.20 equiv). The ice bath was removed, and the reaction mixture was vigorously stirred at room temperature for 1 h. Upon completion, the suspension was diluted with water

(125 mL) and filtered. The filter cake was washed with water and dried under reduced pressure to yield **S7** as a white solid (8.60 g, 22.6 mmol, 90% yield).

**R<sub>F</sub>**: 0.41 (hexanes/EtOAc 6:4)

**<sup>1</sup>H NMR** (400 MHz, *d*<sub>6</sub>-DMSO) δ 9.55 (s, 2H), 7.86 (d, *J* = 8.7 Hz, 4H), 7.69 (d, *J* = 8.7 Hz, 4H), 1.25 (s, 18H).

**<sup>13</sup>C NMR** (101 MHz, *d*<sub>6</sub>-DMSO) δ 193.6, 177.0, 143.3, 131.8, 130.6, 119.1, 39.5, 27.1.

**HRMS**: Exact mass calculated for [C<sub>23</sub>H<sub>28</sub>N<sub>2</sub>O<sub>3</sub> + H]<sup>+</sup>; requires *m/z* = 381.2173. Found 381.2169 (ESI+).

**IR** (FT-ATR, cm<sup>-1</sup>, thin film) *v*<sub>max</sub> = 3296(w), 2972(w), 1661(s), 1645(s), 1589(s), 1516(s), 1400(m), 1309(s), 1282(s), 1246(m), 1166(s), 937(s), 860(s), 762(s), 685(s), 637(s), 509(m).

### ***N,N'*-(1-Hydroxy-2-methylpropane-1,1-diyl)bis(4,1-phenylene))bis(2,2-dimethylpropanamide) (S8)**

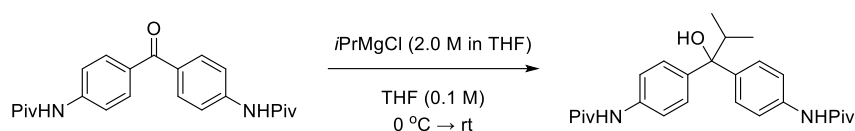

A flame dried 250 mL round-bottom flask equipped with a stir bar was charged with **S7** (3.81 g, 10.0 mmol, 1.00 equiv). The flask was evacuated and backfilled with N<sub>2</sub> (3x) and THF (100 mL, 0.1 M) was added. The resulting white suspension was immersed in an ice bath followed by the dropwise addition of isopropylmagnesium chloride (2 M in THF, 20 mL, 40 mmol, 4.00 equiv.). The dark green reaction mixture was vigorously stirred and allowed to gradually warm to room temperature overnight. After 20 h, the light green suspension was quenched with 10% aqueous (w/v) citric acid solution (100 mL), diluted with EtOAc (100 mL) and transferred to a separatory funnel. The layers were partitioned, and the aqueous layer was extracted with EtOAc (2 x 100 mL). The combined organic layers were washed with Brine (100 mL), dried over anhydrous Na<sub>2</sub>SO<sub>4</sub>, filtered, and concentrated under reduced pressure to afford crude **S5** as a neon yellow foam. The residue was purified by column chromatography (SiO<sub>2</sub>, EtOAc/Hexanes 7:3 → 6:4) to afford **S8** as a yellow foam (2.50 g, 5.90 mmol, 59% yield).

**R<sub>f</sub>**: 0.38 (hexanes/EtOAc 6:4)

**<sup>1</sup>H NMR** (400 MHz, *d*<sub>6</sub>-DMSO) δ 9.09 (s, 1H), 7.49 (d, *J* = 8.8 Hz, 4H), 7.38 (d, *J* = 8.8 Hz, 4H), 5.02 (s, 1H), 2.82 (hept, *J* = 6.6 Hz, 1H), 1.19 (s, 18H), 0.76 (d, *J* = 6.6 Hz, 6H).

**<sup>13</sup>C NMR** (101 MHz, *d*<sub>6</sub>-DMSO) δ 176.2, 143.0, 137.0, 125.7, 119.5, 78.9, 39.0, 34.6, 27.2, 17.2.

**HRMS** (ESI/Q-TOF): Exact mass calculated for [C<sub>26</sub>H<sub>36</sub>N<sub>2</sub>O<sub>3</sub> + H]<sup>+</sup>; requires *m/z* = 425.2799, found *m/z* = 425.2806.

**IR** (FT-ATR, cm<sup>-1</sup>, thin film) *v*<sub>max</sub> = 3331(w), 2965(w), 1657(s), 1599(s), 1523(s), 1402(s), 1319(m), 1175(m), 833(m), 735(m), 704(m).

### **4,4'-(2-Methylpropane-1,1-diyl)dianiline (S9)**

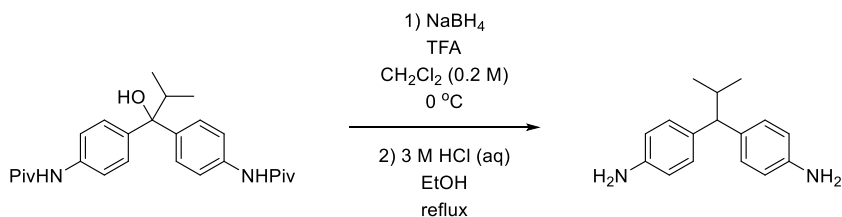

A 250 mL round-bottom flask equipped with a stir bar was charged with **S8** (2.55 g, 6.00 mmol, 1.00 equiv) and  $\text{CH}_2\text{Cl}_2$  (30 mL, 0.2 M). The resulting yellow suspension was immersed in an ice bath followed by the addition of sodium hydride (2.27 g, 60.0 mmol, 10.0 equiv). To the reaction mixture was then added trifluoroacetic acid (60 mL) dropwise via an addition funnel over 40 min (Caution: Aggressive effervescence observed upon addition). The dark yellow suspension was vigorously stirred at 0 °C for 3 h after which, the reaction was diluted with  $\text{CH}_2\text{Cl}_2$  (~170 mL), quenched with 5 M aqueous NaOH (~200 mL), and transferred to a separatory funnel. The layers were partitioned and the aqueous layer was extracted with  $\text{CH}_2\text{Cl}_2$  (2 x 100 mL). The combined organic layers were washed with Brine (100 mL), dried over anhydrous  $\text{Na}_2\text{SO}_4$ , filtered, and concentrated under reduced pressure to afford a white solid which was carried forward without further purification assuming 100% conversion.

A 1 L recovery flask was charged with the crude material (6.00 mmol), 3 M aqueous HCl (90.0 mL, 270 mmol, 24.0 equiv) and EtOH (150 mL). The resulting white suspension was immersed in a pre-heated 85 °C oil bath and vigorously stirred for 3 days. Upon completion, the light-yellow solution was diluted with  $\text{CH}_2\text{Cl}_2$  (200 mL), quenched with 5 M aqueous NaOH (100 mL), and transferred to a separatory funnel. The layers were partitioned, and the aqueous layer was extracted with  $\text{CH}_2\text{Cl}_2$  (2 x 100 mL). The combined organic layers were washed with Brine (100 mL), dried over anhydrous  $\text{Na}_2\text{SO}_4$ , filtered, and concentrated under reduced pressure to afford crude  $\text{CH}_2\text{Cl}_2$  as a brown solid, which was purified by automated reverse-phase column chromatography (Biotage, SNAP C18 Ultra 12 g, gradient MeCN in  $\text{H}_2\text{O}$  (with 0.1% formic acid buffer): 2 CV: 0%; 2 CV: 0-49%; 1 CV: 50%; 1 CV: 50-100%; 1.5 CV: 100%). The product was obtained as a tan solid (purity ~90%, 728 mg, 3.03 mmol, 51% yield over two steps) and used in the next step.

$^1\text{H NMR}$  (400 MHz,  $\text{CDCl}_3$ )  $\delta$  7.02 (d,  $J = 8.4$  Hz, 4H), 6.58 (d,  $J = 8.3$ , 4H), 3.51 (bs, 4H), 3.19 (d,  $J = 10.6$  Hz, 1H), 2.41–2.25 (m, 1H), 0.85 (d,  $J = 6.5$  Hz, 6H).

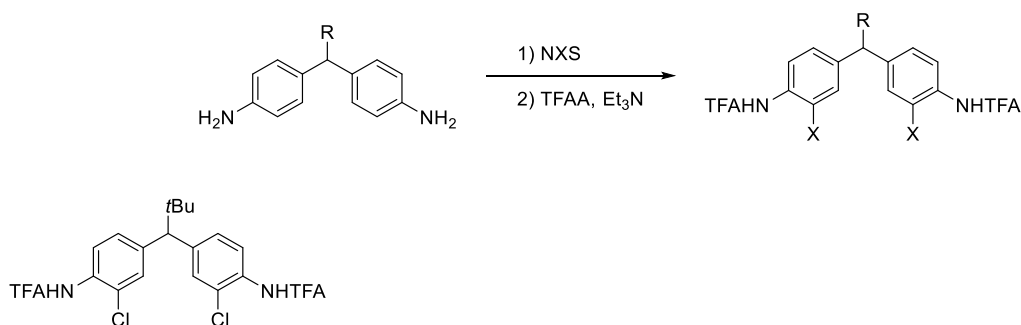

***N,N'*-((2,2-Dimethylpropane-1,1-diyl)bis(2-chloro-4,1-phenylene))bis(2,2,2-trifluoroacetamide) (10)**

In a round-bottom flask **S4** (1.48 g, 5.80 mmol, 1.00 equiv.) was dissolved in MeCN (30 mL). *N*-Chlorosuccinimide (1.55 g, 11.6 mmol, 2.00 equiv.) was added and the mixture was heated at 45 °C for 5 h. After cooling to r.t. the mixture was washed with sat. NaCl (aq.), dried over MgSO<sub>4</sub> and concentrated. The crude material was dissolved in CH<sub>2</sub>Cl<sub>2</sub> (15 mL) and cooled to 0 °C. After slow addition of triethylamine (1.94 mL, 13.9 mmol, 2.40 equiv.) and TFAA (1.77 mL, 12.8 mmol, 2.20 equiv.), the mixture was stirred at r.t. for 3 h. The reaction was washed with sat. NaCl (aq.), dried over MgSO<sub>4</sub> and concentrated *in vacuo*. Purification by automated column chromatography (Biotage, SNAP Ultra 100 g, gradient EtOAc in hexanes: 10 CV: 0-20%) yielded **10** as an orange foam (815 mg, 1.58 mmol, 27% over 2 steps).

**RF:** 0.57 (hexanes/EtOAc 8:2)

**<sup>1</sup>H NMR** (400 MHz, CDCl<sub>3</sub>) δ 8.35 (s, 2H), 8.26 (d, *J* = 8.6 Hz, 2H), 7.42 (d, *J* = 2.1 Hz, 2H), 7.38 (dd, *J* = 8.6, 2.1 Hz, 2H), 3.67 (s, 1H), 1.03 (s, 9H).

**<sup>13</sup>C NMR** (101 MHz, CDCl<sub>3</sub>) δ 141.1, 130.5, 130.3, 129.1, 123.4, 121.4, 62.7, 35.3, 29.0 (C<sub>CO</sub> and C<sub>CF<sub>3</sub></sub> disguised).

**<sup>19</sup>F NMR** (376 MHz, CDCl<sub>3</sub>) δ -75.86.

**HRMS** (ESI/Q-TOF): Exact mass calculated for [C<sub>21</sub>H<sub>18</sub>Cl<sub>2</sub>F<sub>6</sub>N<sub>2</sub>O<sub>2</sub> – H]<sup>-</sup>; requires *m/z* = 513.0577, found *m/z* = 513.0604.

**IR** (FT-ATR, cm<sup>-1</sup>, thin film) *v*<sub>max</sub> = 3401(w), 3304(bw), 2963(w), 2909(w), 2873(w), 1734(s), 1586(m), 1530(s), 1478(m), 1407(m), 1287(s), 1192(bs), 1136(bs), 1052(s), 902(s), 831(m), 736(s), 601(bm)

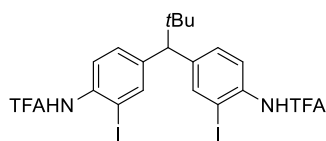

***N,N'*-((2,2-Dimethylpropane-1,1-diyl)bis(2-iodo-4,1-phenylene))bis(2,2,2-trifluoroacetamide) (**3**)**

In a round-bottom flask **S4** (254 mg, 1.00 mmol, 1.00 equiv.) was dissolved in MeCN (5 mL) and cooled to 0 °C. *N*-Iodosuccinimide (450 mg, 2.00 mmol, 2.00 equiv.) was added and the mixture was stirred at r.t. for 17 h. The mixture was washed with sat. NaCl (aq.), the aqueous layer extracted with CH<sub>2</sub>Cl<sub>2</sub> (3x), dried over MgSO<sub>4</sub> and concentrated. The crude material was filtered through a plug of SiO<sub>2</sub>, eluted with EtOAc and concentrated. The crude material was dissolved in CH<sub>2</sub>Cl<sub>2</sub> (5 mL) and cooled to 0 °C. After slow addition of triethylamine (0.33 mL, 2.40 mmol, 2.40 equiv.) and TFAA (0.31 mL, 2.20 mmol, 2.20 equiv.), the mixture was stirred at r.t. for 3 h. The reaction was washed with sat. NaCl (aq.), dried over MgSO<sub>4</sub> and concentrated *in vacuo*. Purification by column chromatography (SiO<sub>2</sub>, hexanes/EtOAc 1:0 → 8:2) yielded **3** as a yellow solid (108 mg, 0.15 mmol, 15% over 2 steps).

**RF:** 0.63 (hexanes/EtOAc 8:2)

**<sup>1</sup>H NMR** (400 MHz, CDCl<sub>3</sub>) δ 8.24 (s, 2H), 8.14 (d, *J* = 8.6 Hz, 2H), 7.79 (d, *J* = 2.1 Hz, 2H), 7.47 (dd, *J* = 8.6, 2.1 Hz, 2H), 3.61 (s, 1H), 1.02 (s, 9H).

**<sup>13</sup>C NMR** (101 MHz, CDCl<sub>3</sub>) δ 154.9 (q, *J* = 37.7 Hz), 142.2, 140.3, 134.3, 130.5, 121.7, 115.7 (q, *J* = 288.8 Hz), 90.3, 62.4, 35.5, 29.2.

**<sup>19</sup>F NMR** (376 MHz, CDCl<sub>3</sub>) δ -75.83.

**HRMS** (ESI/Q-TOF): Exact mass calculated for  $[C_{21}H_{18}I_2F_6N_2O_2 - H]^-$ ; requires  $m/z = 696.9289$ , found  $m/z = 696.9259$ .

**IR** (FT-ATR,  $cm^{-1}$ , thin film)  $\nu_{max} = 3357(w), 3297(bw), 2964(w), 2905(w), 2870(w), 1728(s), 1574(m), 1525(s), 1285(s), 1188(bs), 1154(bs), 1036(m), 901(m), 831(m), 757(m), 734(m)$ .

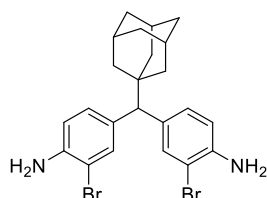

#### **4,4'-(((3*r*,5*r*,7*r*)-Adamantan-1-yl)methylene)bis(2-bromoaniline) (S10)**

In a round-bottom flask **S5** (831 mg, 2.50 mmol, 1.00 equiv.) was dissolved in  $CH_2Cl_2$  (10 mL) and cooled to 0 °C. *N*-Bromosuccinimide (890 mg, 5.00 mmol, 2.00 equiv.) was added and the mixture was stirred at r.t. for 1 h. The mixture was washed with sat. NaCl (aq.), dried over  $MgSO_4$  and concentrated. Purification by column chromatography ( $SiO_2$ , EtOAc/Hexanes 9:1  $\rightarrow$  8:2) yielded **S10** as a brown foam (686 mg, 1.40 mmol, 56% yield).

**R<sub>F</sub>**: 0.43 (hexanes/EtOAc 8:2)

**<sup>1</sup>H NMR** (400 MHz,  $d_6$ -DMSO)  $\delta$ : 7.26 (d,  $J = 2.0$  Hz, 2H), 7.13 (dd,  $J = 8.3, 2.1$  Hz, 2H), 6.71 (d,  $J = 8.3$ , 2H), 5.10 (bs, 4H), 3.22 (s, 1H), 1.89 (bs, 3H), 1.66–1.38 (m, 12H).

**<sup>13</sup>C NMR** (101 MHz,  $d_6$ -DMSO)  $\delta$ : 143.6, 133.1, 131.5, 129.3, 115.0, 106.9, 62.1, 40.5, 36.5, 36.2, 28.1.

**HRMS** (ESI/Q-TOF): Exact mass calculated for  $[C_{23}H_{26}Br_2N_2 + H]^+$ ; requires  $m/z = 489.0541$ , found  $m/z = 489.0535$ .

**IR** (FT-ATR,  $cm^{-1}$ , thin film)  $\nu_{max} = 3466(w), 3350(w), 2972(w), 2900(s), 2847(s), 1614(s), 1499(s), 1445(w), 1410(w), 1310(m), 1107(m), 1036(m), 822(m), 671(w), 586(w)$ .

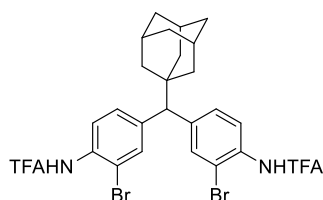

#### ***N,N'*-(((3*r*,5*r*,7*r*)-Adamantan-1-yl)methylene)bis(2-bromo-4,1-phenylene))bis(2,2,2-trifluoroacetamide) (S11)**

In a round-bottom flask **S10** (682 mg, 1.00 mmol, 1.00 equiv.) was dissolved in  $CH_2Cl_2$  (5 mL) and cooled to 0 °C. After slow addition of triethylamine (0.33 mL, 2.40 mmol, 2.40 equiv.) and TFAA (0.28 mL, 2.20 mmol, 2.20 equiv.), the mixture was stirred at r.t. for 2.5 h. The reaction was washed with sat. NaCl (aq.), dried over  $MgSO_4$  and concentrated *in vacuo*. Purification by automated reverse-phase column chromatography (Biotage, SNAP C18 Ultra 60 g, gradient MeCN in  $H_2O$  (with 0.1% formic acid buffer): 2 CV: 0%; 16 CV: 0-100%; 2 CV: 100%) yielded **S11** as a white foam (590 mg, 0.87 mmol, 87%).

**R<sub>F</sub>**: 0.59 (hexanes/EtOAc 8:2)

**<sup>1</sup>H NMR** (400 MHz,  $CDCl_3$ )  $\delta$  8.39 (s, 2H), 8.24 (d,  $J = 8.5$  Hz, 2H), 7.57 (d,  $J = 2.1$  Hz, 2H), 7.44 (dd,  $J = 8.6, 2.1$  Hz, 2H), 3.43 (s, 1H), 2.00 – 1.93 (m, 4H), 1.69 – 1.63 (m, 4H), 1.60 – 1.51 (m, 10H).



$^{13}\text{C}$  NMR (101 MHz,  $\text{CDCl}_3$ )  $\delta$  154.7 (q,  $J = 37.7$  Hz), 140.8, 133.9, 131.7, 129.9, 121.6, 115.69 (q,  $J = 288.7$  Hz), 113.9, 64.7, 41.1, 37.3, 36.7, 28.7.

$^{19}\text{F}$  NMR (376 MHz,  $\text{CDCl}_3$ )  $\delta$  -75.86.

**HRMS** (ESI/Q-TOF): Exact mass calculated for  $[\text{C}_{27}\text{H}_{22}\text{Br}_2\text{F}_6\text{N}_2\text{O}_2 - \text{H}]^-$ ; requires  $m/z = 681.0015$ , found  $m/z = 681.0074$ .

**IR** (FT-ATR,  $\text{cm}^{-1}$ , thin film)  $\nu_{\text{max}} = 3383(\text{w})$ , 2976(w), 2904(m), 2851(m), 1738(s), 1728(s), 1580(m), 1530(s), 1287(s), 1152(bs), 1042(s), 901(s), 733(s), 517(m), 440(m).

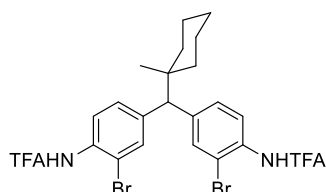

***N,N'*-(((1-Methylcyclohexyl)methylene)bis(2-bromo-4,1-phenylene))bis(2,2,2-trifluoroacetamide) (S12)**

In a round-bottom flask **S6** (950 mg, 3.23 mmol, 1.00 equiv.) was dissolved in  $\text{CH}_2\text{Cl}_2$  (13 mL) and cooled to 0 °C. *N*-Bromosuccinimide (1.15 g, 6.45 mmol, 2.00 equiv.) was added and the mixture was stirred at r.r. for 1 h. The mixture was washed with sat. NaCl (aq.), dried over  $\text{MgSO}_4$  and concentrated. The crude material was dissolved in  $\text{CH}_2\text{Cl}_2$  (13 mL) and cooled to 0 °C. After slow addition of triethylamine (1.07 mL, 7.75 mmol, 2.40 equiv.) and TFAA (0.99 mL, 7.11 mmol, 2.20 equiv.), the mixture was stirred at r.t. for 2 h. The reaction was washed with sat. NaCl (aq.), dried over  $\text{MgSO}_4$  and concentrated *in vacuo*. Purification by automated column chromatography (Biotage, SNAP Ultra 100 g, gradient EtOAc in hexanes: 13 CV: 0-25%) yielded **S12** as a white foam (1.49 g, 2.31 mmol, 72% over 2 steps).

**Rf**: 0.58 (hexanes/EtOAc 8:2)

$^1\text{H}$  NMR (400 MHz,  $\text{CDCl}_3$ )  $\delta$  8.38 (s, 2H), 8.24 (d,  $J = 8.6$  Hz, 2H), 7.58 (d,  $J = 2.1$  Hz, 2H), 7.43 (dd,  $J = 8.6, 2.1$  Hz, 2H), 3.74 (s, 1H), 1.53 (tt,  $J = 8.9, 4.7$  Hz, 3H), 1.46 – 1.28 (m, 6H), 1.19 (ddt,  $J = 12.4, 8.1, 4.0$  Hz, 1H), 1.06 (s, 3H).

$^{13}\text{C}$  NMR (101 MHz,  $\text{CDCl}_3$ )  $\delta$  154.8 (q,  $J = 37.9$  Hz), 141.2, 134.0, 131.7, 130.2, 121.7, 115.7 (q,  $J = 288.7$  Hz), 113.9, 62.7, 37.9, 37.1, 26.0, 22.0, 21.4.

$^{19}\text{F}$  NMR (376 MHz,  $\text{CDCl}_3$ )  $\delta$  -75.88.

**HRMS** (ESI/Q-TOF): Exact mass calculated for  $[\text{C}_{24}\text{H}_{22}\text{Br}_2\text{F}_6\text{N}_2\text{O}_2 - \text{H}]^-$ ; requires  $m/z = 642.9859$ , found  $m/z = 642.9929$ .

**IR** (FT-ATR,  $\text{cm}^{-1}$ , thin film)  $\nu_{\text{max}} = 3384(\text{w})$ , 3304(bw), 2927(w), 2859(w), 1736(s), 1603(w), 1579(m), 1527(s), 1478(m), 1403(m), 1331(w), 1285(s), 1148(bs), 1041(s), 901(s), 819(m), 759 (m), 733(s), 715(m), 672(m), 594(bs), 516(s).

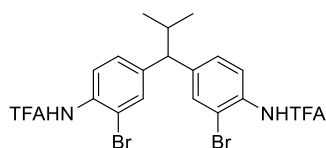

***N,N'*-((2-Methylpropane-1,1-diyl)bis(2-bromo-4,1-phenylene))bis(2,2,2-trifluoroacetamide) (S13)**

In a round-bottom flask **S9** (721 mg, 3.00 mmol, 1.00 equiv.) was dissolved in CH<sub>2</sub>Cl<sub>2</sub> (12 mL) and cooled to 0 °C. *N*-Bromosuccinimide (1.07 g, 6.00 mmol, 2.00 equiv.) was added and the mixture was stirred at r.r. for 1.5 h. The mixture was washed with sat. NaCl (aq.), dried over MgSO<sub>4</sub> and concentrated. The crude material was dissolved in CH<sub>2</sub>Cl<sub>2</sub> (13 mL) and cooled to 0 °C. After slow addition of triethylamine (1.00 mL, 7.20 mmol, 2.40 equiv.) and TFAA (0.92 mL, 6.60 mmol, 2.20 equiv.), the mixture was stirred at r.t. for 2 h. The reaction was washed with sat. NaCl (aq.), dried over MgSO<sub>4</sub> and concentrated *in vacuo*. Purification by automated reverse-phase column chromatography (Biotage, SNAP C18 Ultra 60 g, gradient MeCN in H<sub>2</sub>O (with 0.1% formic acid buffer): 2 CV: 0%; 19 CV: 0-100%; 2 CV: 100%) yielded **S13** as a white foam (514 mg, 0.87 mmol, 29% over 2 steps).

**R<sub>F</sub>**: 0.55 (hexanes/EtOAc 8:2)

**<sup>1</sup>H NMR** (400 MHz, CDCl<sub>3</sub>) δ 8.37 (s, 2H), 8.23 (d, *J* = 8.5 Hz, 2H), 7.45 (d, *J* = 2.0 Hz, 2H), 7.28 (dd, *J* = 8.5, 2.0 Hz, 2H), 3.37 (d, *J* = 10.8 Hz, 1H), 2.41 (dsept, *J* = 10.7, 6.5 Hz, 1H), 0.89 (d, *J* = 6.5 Hz, 6H).

**<sup>13</sup>C NMR** (101 MHz, CDCl<sub>3</sub>) δ 154.7 (q, *J* = 37.8 Hz), 143.4, 132.0, 131.7, 128.2, 122.3, 115.7 (d, *J* = 288.7 Hz), 114.5, 59.2, 31.9, 21.7.

**<sup>19</sup>F NMR** (376 MHz, CDCl<sub>3</sub>) δ -75.87.

**HRMS** (ESI/Q-TOF): Exact mass calculated for [C<sub>20</sub>H<sub>14</sub>Br<sub>2</sub>F<sub>6</sub>N<sub>2</sub>O<sub>2</sub> – H]<sup>-</sup>; requires *m/z* = 588.9389, found *m/z* = 588.9452.

**IR** (FT-ATR, cm<sup>-1</sup>, thin film) *v*<sub>max</sub> = 3383(w), 2974(w), 2874(w), 1738(s), 1730(s), 1582(m), 1530(s), 1406(m), 1285(s), 1152(bs), 1042(s), 903(s), 816(m), 733(s), 592(m), 440(m).

## 4. Reaction Optimization

**General Procedure B (GP B)** for reaction conditions optimization screening:

A 1-dram vial equipped with stir bar and septum cap was charged with **1** (60.4 mg, 0.10 mmol, 1.00 equiv.), Cu(I) source, TMG-Asp-<sup>D</sup>Pro-Aib-OLi (**L1**), base (0.40 mmol, 4.00 equiv.) and NaI. The vial was evacuated and backfilled with N<sub>2</sub> (3x) before dry solvent was added. The reaction mixture was heated at the reported temperature for 15 h. After cooling to r.t., the mixture was filtered through a plug of SiO<sub>2</sub> (eluted with EtOAc) and concentrated *in vacuo*. The crude material was used for determination of NMR yield (CH<sub>2</sub>Br<sub>2</sub> as internal standard;  $\delta = 3.64$  ppm) and chiral HPLC analysis.

*Solvent and base screen:*

**Table S1:** Conditions optimization – solvent and base screen.

**Asymmetric Aromatic Finkelstein Reaction:**

| entry | base                            | solvent     | c [M] | 1 [%] | 2 [%] | 3 [%] | e.r. (2)   |
|-------|---------------------------------|-------------|-------|-------|-------|-------|------------|
| 1     | K <sub>3</sub> PO <sub>4</sub>  | MeCN        | 0.5   | 24    | 49    | 10    | 10 : 90    |
| 2     | K <sub>3</sub> PO <sub>4</sub>  | DMF         | 0.5   | 26    | 43    | 19    | 41 : 59    |
| 3     | K <sub>3</sub> PO <sub>4</sub>  | THF         | 0.5   | 64    | 16    | <5    | (~20 : 80) |
| 4     | K <sub>3</sub> PO <sub>4</sub>  | DMF/Tol 1:1 | 0.5   | 22    | 55    | 13    | 9 : 91     |
| 5     | Cs <sub>2</sub> CO <sub>3</sub> | MeCN        | 0.5   | 38    | 14    | <5    | 35 : 65    |

*Copper source screen:*

**Table S2:** Conditions optimization – Cu(I) screen.

**Asymmetric Aromatic Finkelstein Reaction:**

| entry | Cu source                                      | c [M] | 1 [%] | 2 [%] | 3 [%] | e.r. (2) |
|-------|------------------------------------------------|-------|-------|-------|-------|----------|
| 1     | CuI (5 mol%)                                   | 0.5   | 24    | 49    | 10    | 10 : 90  |
| 2     | Cu(MeCN) <sub>4</sub> OTf (5 mol%)             | 0.5   | 40    | 45    | 5     | 9 : 91   |
| 3     | Cu(MeCN) <sub>4</sub> PF <sub>6</sub> (5 mol%) | 0.5   | 35    | 46    | 7     | 9 : 91   |
| 4     | Cu(MeCN) <sub>4</sub> BF <sub>4</sub> (5 mol%) | 0.5   | 26    | 52    | 9     | 8 : 92   |

## Concentration screen

**Table S3:** Conditions optimization – concentration screen.

**Asymmetric Aromatic Finkelstein Reaction:**

| entry | c [M] | 1 [%] | 2 [%] | 3 [%] | e.r. (2) |
|-------|-------|-------|-------|-------|----------|
| 1     | 0.50  | 26    | 52    | 9     | 8 : 92   |
| 2     | 0.33  | 41    | 46    | 5     | 9 : 91   |
| 3     | 0.20  | 39    | 48    | 6     | 9 : 91   |
| 4     | 0.10  | 38    | 47    | 6     | 9 : 91   |

## Loading screen

**Table S4:** Conditions optimization – loading screen.

**Asymmetric Aromatic Finkelstein Reaction:**

| entry | Cu loading | Ligand loading | NaI [equiv.] | 1 [%] | 2 [%] | 3 [%] | e.r. (2) |
|-------|------------|----------------|--------------|-------|-------|-------|----------|
| 1     | 5 mol%     | 10 mol%        | 1.1          | 26    | 52    | 9     | 8 : 92   |
| 2     | 10 mol%    | 20 mol%        | 1.1          | 17    | 50    | 12    | 7 : 93   |
| 3     | 10 mol%    | 15 mol%        | 1.1          | 17    | 53    | 14    | 7 : 93   |
| 4     | 10 mol%    | 15 mol%        | 1.2          | 15    | 62    | 20    | 6 : 94   |
| 5     | 10 mol%    | 15 mol%        | 1.3          | 17    | 59    | 16    | 7 : 93   |
| 6     | 10 mol%    | 15 mol%        | 1.5          | 16    | 57    | 14    | 8 : 92   |

## Temperature screen

**Table S5:** Conditions optimization - temperature screen.

**Asymmetric Aromatic Finkelstein Reaction:**

| entry | Temperature | 1 [%] | 2 [%] | 3 [%] | e.r. (2) |
|-------|-------------|-------|-------|-------|----------|
| 13    | 50 °C       | 17    | 53    | 14    | 7 : 93   |
| 14    | 45 °C       | 41    | 52    | 7     | 8 : 92   |
| 15    | 40 °C       | 48    | 46    | 5     | 9 : 91   |
| 16    | 30 °C       | 73    | 25    | 2     | 10 : 90  |
| 17    | r.t.        | 89    | 10    | 0     | 11 : 89  |

**General Procedure C (GP C)** for catalyst optimization screening:

A 1-dram vial equipped with stir bar and septum cap was charged with **1** (60.4 mg, 0.10 mmol, 1.00 equiv.), Cu(MeCN)<sub>4</sub>BF<sub>4</sub> (3.1 mg, 0.01 mmol, 0.10 equiv.), TMG-Asp-<sup>D</sup>Pro-Aib-OLi (**L1**) (0.015 mmol, 0.15 equiv.), K<sub>3</sub>PO<sub>4</sub> (84.9 mg, 0.40 mmol, 4.00 equiv.) and NaI (18.0 mg, 0.12 mmol, 1.20 equiv.). The vial was evacuated and backfilled with N<sub>2</sub> (3x) before dry MeCN (0.20 mL, 0.50 M) was added. The reaction mixture was heated at 50 °C for 15 h. After cooling to r.t., the mixture was filtered through a plug of SiO<sub>2</sub> (eluted with EtOAc) and concentrated *in vacuo*. The crude material was used for determination of NMR yield (CH<sub>2</sub>Br<sub>2</sub> as internal standard; δ = 3.64 ppm) and chiral HPLC analysis.

**Table S6:** Catalyst optimization screen.

**Asymmetric Aromatic Finkelstein Reaction:**

| entry | ligand                                               | 1 [%] | 2 [%] | 3 [%] | e.r. (2) |
|-------|------------------------------------------------------|-------|-------|-------|----------|
| 1     | TMG-Asp- <sup>D</sup> Pro-Aib-OLi                    | 15    | 62    | 20    | 6 : 94   |
| 2     | TMG-Gly-OLi                                          | 14    | 37    | 29    | 50 : 50  |
| 3     | TMG-1NaI-OH                                          | 13    | 38    | 30    | 58 : 42  |
| 4     | TMG-Neo-OH                                           | 25    | 44    | 18    | 66 : 34  |
| 5     | TMG- <sup>D</sup> Asp-Pro-OLi                        | 23    | 47    | 7     | 90 : 10  |
| 6     | TMG- <sup>D</sup> Asp-αMePro-OLi                     | 24    | 52    | 10    | 91 : 9   |
| 7     | TMG-Asp- <sup>D</sup> Pro-Acpc-OLi                   | 51    | 40    | 4     | 10 : 90  |
| 8     | TMG-Asp- <sup>D</sup> Pro-Acpc-Leu-OLi               | 13    | 62    | 19    | 5 : 95   |
| 9     | TMG-Asp- <sup>D</sup> Pro-Acpc- <sup>t</sup> Leu-OLi | 8     | 62    | 22    | 4 : 96   |
| 10    | TMG-Asp- <sup>D</sup> Pro-Acpc-Phe-OLi               | 8     | 55    | 16    | 4 : 96   |
| 11    | TMG- <sup>D</sup> Asp- <sup>D</sup> Pro-Acpc-Phe-OLi | 45    | 30    | 4     | 72 : 28  |
| 12    | TMG-Asp- <sup>D</sup> Pro-Aic-Phe-OLi                | 8     | 54    | 17    | 5 : 95   |
| 13    | TMG-Asp- <sup>D</sup> Pro-Acpc-2NaI-NHMe             | 42    | 48    | 9     | 19 : 81  |
| 14    | TMG-Asp- <sup>D</sup> Pro-Acpc-Chg-OLi               | 14    | 64    | 14    | 4 : 96   |
| 15    | TMG-Asp- <sup>D</sup> Pro-Aib- <sup>D</sup> Leu-OLi  | 31    | 52    | 8     | 8 : 92   |
| 16    | TMG-Asp- <sup>D</sup> Pro-Aib-Val-OLi                | 6     | 56    | 20    | 4 : 96   |

## 5. Preparation and Characterization of Products

### 5.1 Preparation and Characterization of 2

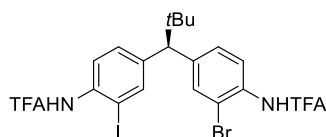

#### (S)-N-(2-Bromo-4-(1-(3-iodo-4-(2,2,2-trifluoroacetamido)phenyl)-2,2-dimethylpropyl)phenyl)-2,2,2-trifluoroacetamide (**2**)

A 1-dram vial equipped with stir bar and septum cap was charged with **1** (120.8 mg, 0.20 mmol, 1.00 equiv.),  $\text{Cu}(\text{MeCN})_4\text{BF}_4$  (4.4 mg, 14.0  $\mu\text{mol}$ , 0.07 equiv.), **L9** (15.9 mg, 0.03 mmol, 0.15 equiv.),  $\text{K}_3\text{PO}_4$  (169.8 mg, 0.80 mmol, 4.00 equiv.) and NaI (36.0 mg, 0.24 mmol, 1.20 equiv.). The vial was evacuated and backfilled with  $\text{N}_2$  (3x) before dry MeCN (0.3 mL, 0.66 M) was added. The reaction mixture was heated at 50 °C for 16 h. After cooling to r.t., the mixture was filtered through a plug of  $\text{SiO}_2$  (eluted with EtOAc). The product is obtained as an inseparable mixture of **1**, **2** and **3**. NMR yield (64%;  $\delta = 3.64$  ppm) was determined against  $\text{CH}_2\text{Br}_2$  as internal standard and the enantiomeric ratio (e.r. 95:5) could be determined by chiral HPLC comparing against authentic samples of **1** and **3**.

A single crystal for x-ray crystallography was obtained by slow evaporation of the product mixture from EtOAc.

A racemic standard was obtained by using TMG-Gly-OLi (**L2**, Table S6, entry 2).

**R<sub>f</sub>**: 0.57 (hexanes/EtOAc 8:2)

**<sup>1</sup>H NMR** (400 MHz,  $\text{CDCl}_3$ )  $\delta$  8.40 (s, 1H), 8.27 – 8.21 (m, 2H), 8.14 (d,  $J = 8.5$  Hz, 1H), 7.80 (s, 1H), 7.58 (t,  $J = 2.2$  Hz, 1H), 7.51 – 7.46 (m, 1H), 7.45 – 7.40 (m, 1H), 3.64 (s, 1H), 1.03 (s, 9H).

**<sup>13</sup>C NMR** (101 MHz,  $\text{CDCl}_3$ )  $\delta$  154.8 (q,  $J = 37.8$  Hz), 154.7 (q,  $J = 37.8$  Hz), 142.2, 141.7, 140.3, 134.3, 133.7, 131.7, 130.5, 129.8, 121.8, 121.7, 115.7 (q,  $J = 288.8$  Hz), 115.7 (q,  $J = 288.8$  Hz), 114.0, 90.3, 62.6, 35.4, 29.1.

**<sup>19</sup>F NMR** (376 MHz,  $\text{CDCl}_3$ )  $\delta$  -75.84, -75.87.

**HRMS** (ESI/Q-TOF): Exact mass calculated for  $[\text{C}_{21}\text{H}_{18}\text{BrF}_6\text{IN}_2\text{O}_2 - \text{H}]^-$ ; requires  $m/z = 648.9428$ , found  $m/z = 648.9324$ .

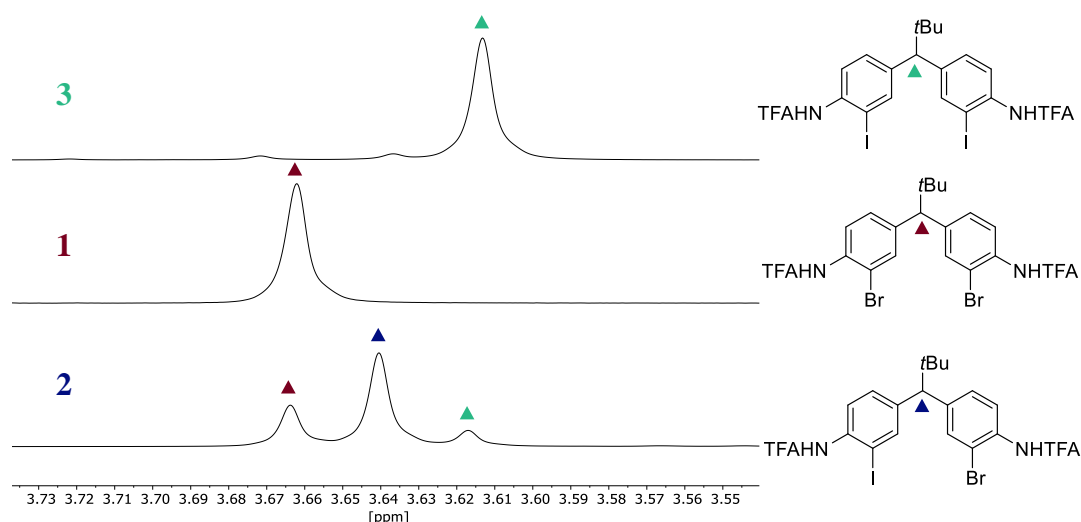

**HPLC** (Chiralpak AD-H column, 2% *i*-PrOH in hexanes, 0.5 ml/min, 254 nm):  $t_R$  (minor enantiomer) = 17.5 min,  $t_R$  (major enantiomer) = 18.5 min.

*racemic sample:*

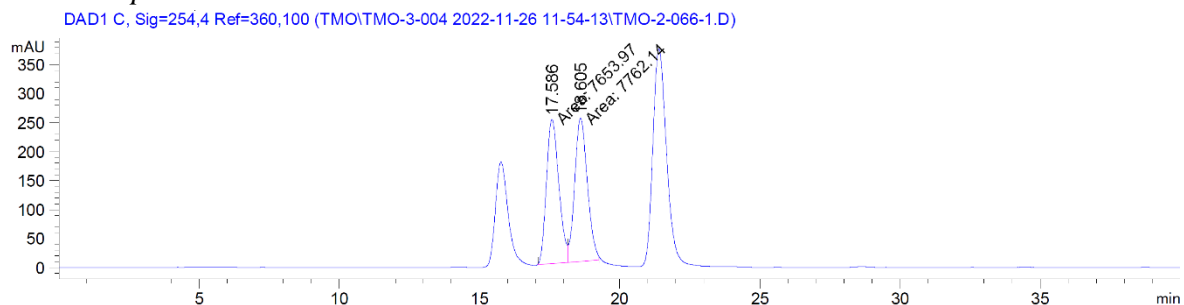

Signal 3: DAD1 C, Sig=254,4 Ref=360,100

| Peak # | RetTime [min] | Type | Width [min] | Area [mAU*s] | Height [mAU] | Area %  |
|--------|---------------|------|-------------|--------------|--------------|---------|
| 1      | 17.586        | MF   | 0.5130      | 7653.97021   | 248.65410    | 49.6492 |
| 2      | 18.605        | FM   | 0.5239      | 7762.13770   | 246.93634    | 50.3508 |

Totals : 1.54161e4 495.59044

*enantioselective sample:*

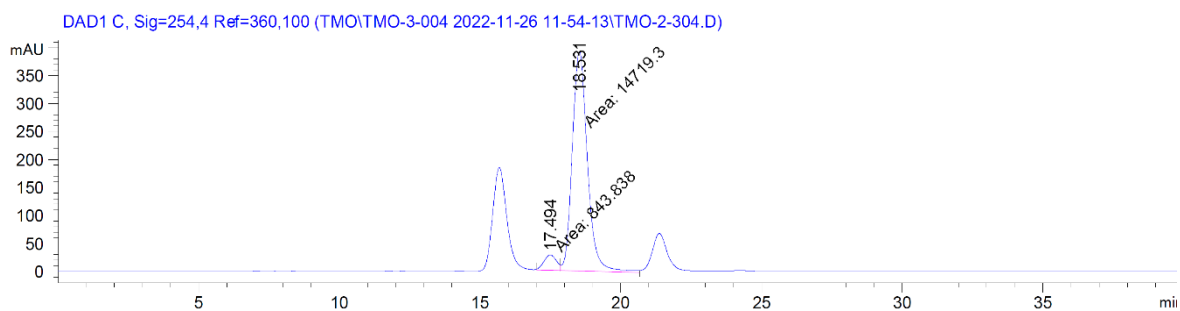

Signal 3: DAD1 C, Sig=254,4 Ref=360,100

| Peak # | RetTime [min] | Type | Width [min] | Area [mAU*s] | Height [mAU] | Area %  |
|--------|---------------|------|-------------|--------------|--------------|---------|
| 1      | 17.494        | MF   | 0.5124      | 843.83777    | 27.44887     | 5.4220  |
| 2      | 18.531        | FM   | 0.6251      | 1.47193e4    | 392.44827    | 94.5780 |

Totals : 1.55632e4 419.89714

*authentic sample of 1:*

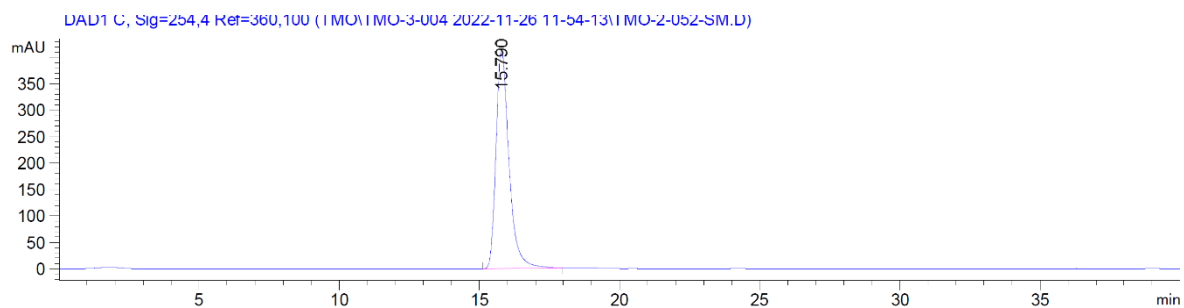

authentic sample of **3**:

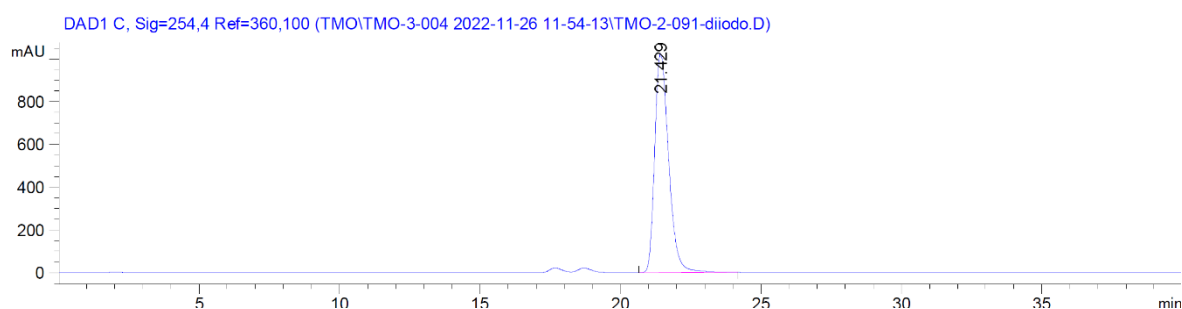

## 5.2 Preparation and Characterization of Asymmetric Aromatic Finkelstein / Heck Sequence Products

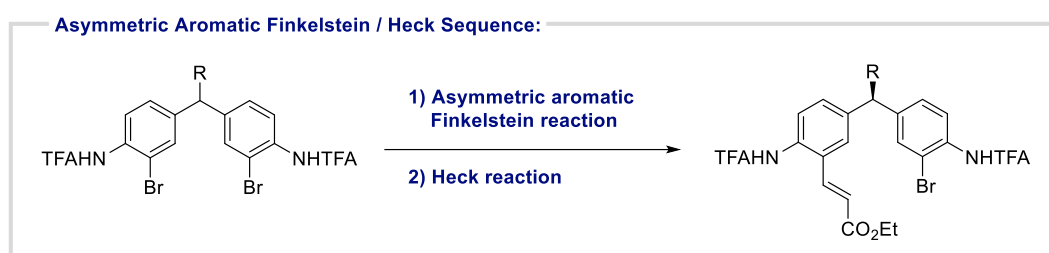

**General Procedure D (GP D)** for the asymmetric aromatic Finkelstein / Heck reaction sequence:

A 1-dram vial equipped with stir bar and septum cap was charged with corresponding diarylmethine (0.20 mmol, 1.00 equiv.),  $\text{Cu}(\text{MeCN})_4\text{BF}_4$  (4.4 mg, 14.0  $\mu\text{mol}$ , 0.07 equiv.), **L9** (15.9 mg, 0.03 mmol, 0.15 equiv.),  $\text{K}_3\text{PO}_4$  (169.8 mg, 0.80 mmol, 4.00 equiv.) and NaI (36.0 mg, 0.24 mmol, 1.20 equiv.). The vial was evacuated and backfilled with  $\text{N}_2$  (3x) before dry MeCN (0.3 mL, 0.66 M) was added. The reaction mixture was heated at 50 °C for 16 h. After cooling to r.t., the mixture was filtered through a plug of  $\text{SiO}_2$  (eluted with EtOAc), transferred into a scintillation vial and concentrated *in vacuo*.

To the vial containing the crude material was added a stir bar and  $\text{Pd}(\text{OAc})_2$  (4.5 mg, 0.02 mmol, 0.10 equiv.). Following evacuation and back-filling with  $\text{N}_2$  (3x), dry DMF (1.0 mL, 0.2 M), ethyl acrylate (20.7  $\mu\text{L}$ , 0.19 mmol, 0.95 equiv.) and  $\text{Et}_3\text{N}$  (38.8  $\mu\text{L}$ , 0.28 mmol, 1.40 equiv.) was added. The vial was sealed and heated at 100 °C for 2 h. The reaction mixture was cooled to r.t. and the solvent was removed by airflow evaporation. Purification by automated column chromatography (Biotage, SNAP Ultra 10 g, gradient EtOAc in hexanes) yielded the desired products.

**General Procedure E (GP E)** for the synthesis of racemic Heck reaction products:

A 1-dram vial equipped with stir bar and septum cap was charged with corresponding diarylmethine (0.10 mmol, 1.00 equiv.),  $\text{Pd}(\text{PPh}_3)_4$  (2.9 mg, 2.50  $\mu\text{mol}$ , 0.025 equiv.) and  $\text{K}_3\text{PO}_4$  (63.7 mg, 0.30 mmol, 3.00 equiv.) The vial was evacuated and backfilled with  $\text{N}_2$  (3x) before dry toluene (0.5 mL, 0.2 M) and ethyl acrylate (12.0  $\mu\text{L}$ , 0.11 mmol, 1.10 equiv.) was added. The reaction mixture was heated at 100 °C for 20 h. After cooling to r.t., the mixture was filtered through a plug of  $\text{SiO}_2$  (eluted with EtOAc), concentrated *in vacuo* and purified by automated column chromatography (Biotage, SNAP Ultra 10 g, gradient EtOAc in hexanes).



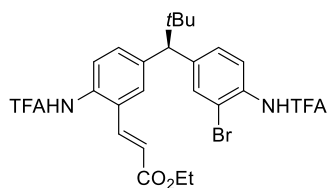

**Ethyl (*R,E*)-3-(5-(1-(3-bromo-4-(2,2,2-trifluoroacetamido)phenyl)-2,2-dimethylpropyl)-2,2-dimethylpropyl)-2,2,2-trifluoroacetamido)phenylacrylate (**4**)**

According to **GP D, 1** (120.8 mg, 0.20 mmol, 1.00 equiv.) was converted to **4**. Purification by automated column chromatography (Biotage, SNAP Ultra 10 g, gradient EtOAc in hexanes: 15 CV: 0-25%) yielded **4** as a white foam (53.3 mg, 0.09 mmol, 43% over 2 steps / Finkelstein reaction: 64% NMR yield, Heck reaction: 67%).

**RF:** 0.38 (hexanes/EtOAc 8:2)

**<sup>1</sup>H NMR** (400 MHz, CDCl<sub>3</sub>) δ 8.39 (s, 1H), 8.23 (d, *J* = 8.6 Hz, 2H), 7.76 – 7.67 (m, 2H), 7.59 (d, *J* = 2.0 Hz, 1H), 7.54 (d, *J* = 2.1 Hz, 1H), 7.50 (dd, *J* = 8.5, 2.1 Hz, 1H), 7.45 (dd, *J* = 8.6, 2.1 Hz, 1H), 6.38 (d, *J* = 15.8 Hz, 1H), 4.22 (q, *J* = 7.1 Hz, 2H), 3.71 (s, 1H), 1.29 (t, *J* = 7.1 Hz, 3H), 1.03 (s, 9H).

**<sup>13</sup>C NMR** (101 MHz, CDCl<sub>3</sub>) δ 166.4, 155.7 (q, *J* = 37.5 Hz), 154.8 (q, *J* = 37.9 Hz), 141.9, 141.7, 138.3, 133.8, 131.9, 131.8, 131.4, 129.7, 129.1, 128.4, 125.0, 122.3, 121.8, 115.9 (q, *J* = 288.5 Hz), 115.5 (q, *J* = 288.5 Hz), 114.0, 63.1, 61.1, 35.4, 29.2, 14.3.

**<sup>19</sup>F NMR** (376 MHz, CDCl<sub>3</sub>) δ -75.50, -75.89.

**HRMS** (ESI/Q-TOF): Exact mass calculated for [C<sub>26</sub>H<sub>25</sub>BrF<sub>6</sub>N<sub>2</sub>O<sub>4</sub> – H]<sup>–</sup>; requires *m/z* = 623.0809, found *m/z* = 623.0744.

**IR** (FT-ATR, cm<sup>-1</sup>, thin film) *v*<sub>max</sub> = 3386(w), 3278(bw), 2966(w), 2909(w), 2869(w), 1700(bs), 1533(bs), 1285(m), 1258(m), 1194(bs), 1158(bs), 1043(w), 981(w), 903(w), 758(w), 736(w).

**Optical:** [α]<sub>D20</sub> = -27.6° (*er* = 94:6, *c* = 1.0, CHCl<sub>3</sub>).

**HPLC** (Chiralpak AD-H column, 2% *i*-PrOH in hexanes, 0.5 ml/min, 254 nm): *t*<sub>R</sub> (minor enantiomer) = 17.5 min, *t*<sub>R</sub> (major enantiomer) = 18.5 min.

*racemic sample:*

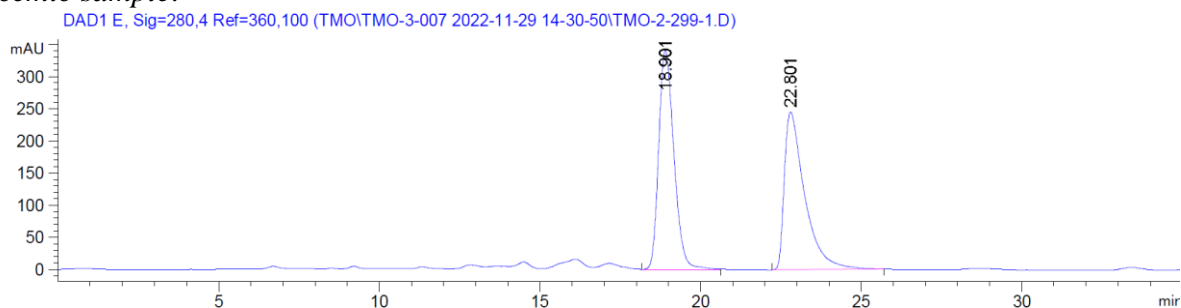

Signal 4: DAD1 E, Sig=280,4 Ref=360,100

| Peak # | RetTime [min] | Type | Width [min] | Area [mAU*s] | Height [mAU] | Area %  |
|--------|---------------|------|-------------|--------------|--------------|---------|
| 1      | 18.901        | VV   | 0.5052      | 1.12553e4    | 340.89792    | 51.0166 |
| 2      | 22.801        | BB   | 0.6437      | 1.08067e4    | 245.41492    | 48.9834 |

Totals : 2.20620e4 586.31284

enantioselective sample:

DAD1 E, Sig=280,4 Ref=360,100 (TMO\TMO-3-007 2022-11-29 17-04-23\TMO-3-007.D)

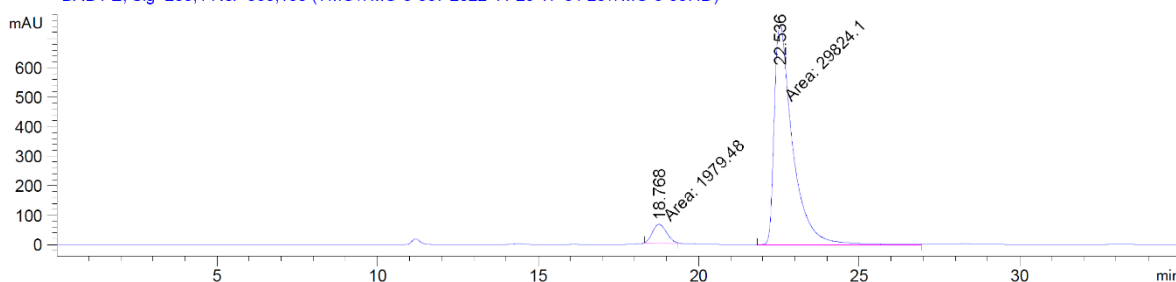

Signal 4: DAD1 E, Sig=280,4 Ref=360,100

| Peak # | RetTime [min] | Type | Width [min] | Area [mAU*s] | Height [mAU] | Area %  |
|--------|---------------|------|-------------|--------------|--------------|---------|
| 1      | 18.768        | MM   | 0.5109      | 1979.47913   | 64.57323     | 6.2241  |
| 2      | 22.536        | MM   | 0.6663      | 2.98241e4    | 746.03143    | 93.7759 |

Totals : 3.18036e4 810.60467

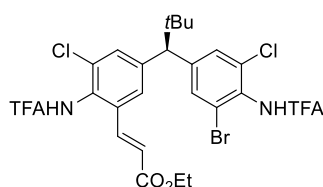

**Ethyl (*R,E*)-3-(5-(1-(3-bromo-5-chloro-4-(2,2,2-trifluoroacetamido)phenyl)-2,2-dimethylpropyl)-3-chloro-2-(2,2,2-trifluoroacetamido)phenyl)acrylate (**9**)**

According to **GP D, S1** (134.6 mg, 0.20 mmol, 1.00 equiv.) was converted to **9**. Purification by automated column chromatography (Biotage, SNAP Ultra 10 g, gradient EtOAc in hexanes: 18 CV: 0-25%) yielded **9** as a white foam (80.3 mg, 0.12 mmol, 58% over 2 steps)

**R<sub>F</sub>**: 0.25 (hexanes/EtOAc 8:2)

**<sup>1</sup>H NMR** (400 MHz, CDCl<sub>3</sub>) δ 8.06 (s, 1H), 7.83 (s, 1H), 7.62 – 7.54 (m, 2H), 7.50 (d, *J* = 5.4 Hz, 2H), 7.45 (d, *J* = 1.9 Hz, 1H), 6.39 (d, *J* = 15.9 Hz, 1H), 4.22 (q, *J* = 7.1 Hz, 2H), 3.70 (s, 1H), 1.29 (t, *J* = 7.1 Hz, 3H), 1.06 (s, 9H).

**<sup>13</sup>C NMR** (101 MHz, CDCl<sub>3</sub>) δ 166.2, 156.1 (q, *J* = 38.2 Hz), 155.2 (q, *J* = 38.3 Hz), 144.8, 143.4, 138.4, 134.1, 133.4, 132.9, 132.5, 131.8, 130.4, 129.0, 128.6, 127.2, 123.2, 122.7, 115.8 (q, *J* = 288.3 Hz), 115.8 (q, *J* = 288.3 Hz), 62.9, 61.2, 35.5, 29.1, 14.2.

**<sup>19</sup>F NMR** (376 MHz, CDCl<sub>3</sub>) δ -75.31, -75.48.

**HRMS** (ESI/Q-TOF): Exact mass calculated for [C<sub>26</sub>H<sub>23</sub>BrCl<sub>2</sub>F<sub>6</sub>N<sub>2</sub>O<sub>4</sub> – H]<sup>-</sup>; requires *m/z* = 691.0029, found *m/z* = 691.0032.

**IR** (FT-ATR, cm<sup>-1</sup>, thin film) *v*<sub>max</sub> = 3254(bm), 3039(bw), 2968(w), 2910(w), 2876(w), 1719(bs), 1636(w), 1536(m), 1465(m), 1369(w), 1318(m), 1269(m), 1201(bs), 1160(bs), 1039(w), 977(w), 919(w), 864(w), 758(m).

**Optical**: [α]<sub>D</sub><sup>20</sup> = -16.2° (*er* = 93:7, *c* = 1.0, CHCl<sub>3</sub>).

**HPLC** (Chiralpak IB column, 5% *i*-PrOH in hexanes, 1.0 ml/min, 230 nm): *t<sub>R</sub>* (minor enantiomer) = 10.6 min, *t<sub>R</sub>* (major enantiomer) = 20.3 min.

racemic sample:

DAD1 B, Sig=230,4 Ref=360,100 (TMO\TMO-3-040 2023-02-02 08-08-58\TMO-3-037.D)

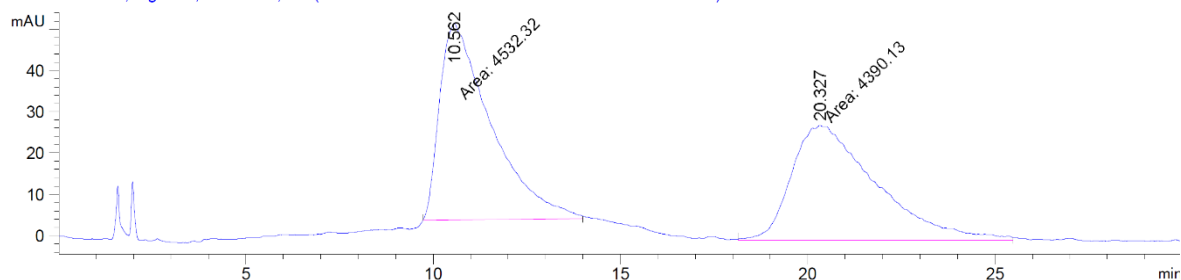

Signal 2: DAD1 B, Sig=230,4 Ref=360,100

| Peak # | RetTime [min] | Type | Width [min] | Area [mAU*s] | Height [mAU] | Area %  |
|--------|---------------|------|-------------|--------------|--------------|---------|
| 1      | 10.562        | MM   | 1.5819      | 4532.31592   | 47.75224     | 50.7968 |
| 2      | 20.327        | MM   | 2.6214      | 4390.13135   | 27.91212     | 49.2032 |

Totals : 8922.44727 75.66436

enantioselective sample:

DAD1 B, Sig=230,4 Ref=360,100 (TMO\TMO-3-040 2023-02-02 08-08-58\TMO-3-040.D)

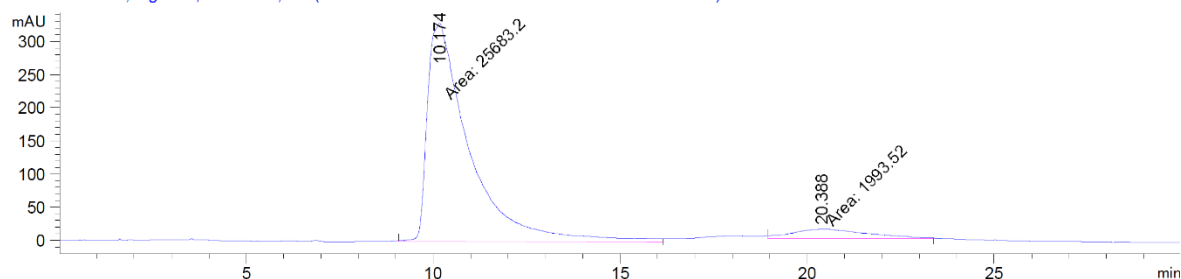

Signal 2: DAD1 B, Sig=230,4 Ref=360,100

| Peak # | RetTime [min] | Type | Width [min] | Area [mAU*s] | Height [mAU] | Area %  |
|--------|---------------|------|-------------|--------------|--------------|---------|
| 1      | 10.174        | MM   | 1.3021      | 2.56832e4    | 328.75165    | 92.7971 |
| 2      | 20.388        | MM   | 2.3327      | 1993.51941   | 14.24329     | 7.2029  |

Totals : 2.76767e4 342.99493

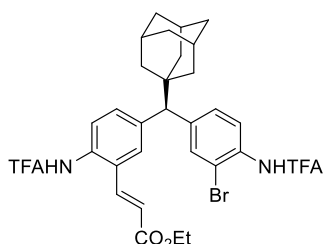

**Ethyl (E)-3-(5-((1R)-(1r,3R)-adamantan-1-yl)(3-bromo-4-(2,2,2-trifluoroacetamido)phenyl)methyl)-2-(2,2,2-trifluoroacetamido)phenylacrylate (11)**

According to **GP D, S11** (136.4 mg, 0.20 mmol, 1.00 equiv.) was converted to **11**. Purification by automated column chromatography (Biotage, SNAP Ultra 10 g, gradient EtOAc in hexanes: 25 CV: 0-20%) yielded **11** as a white foam (49.6 mg, 0.07 mmol, 35% over 2 steps)

**R<sub>f</sub>**: 0.42 (hexanes/EtOAc 8:2)

**<sup>1</sup>H NMR** (400 MHz, CDCl<sub>3</sub>) δ 8.39 (s, 1H), 8.23 (d, *J* = 8.6 Hz, 1H), 8.15 (s, 1H), 7.76 – 7.69 (m, 2H), 7.58 (d, *J* = 2.0 Hz, 1H), 7.54 – 7.49 (m, 2H), 7.46 (dd, *J* = 8.6, 2.0 Hz, 1H), 6.40 (d,

$J = 15.9$  Hz, 1H), 4.23 (q,  $J = 7.1$  Hz, 2H), 3.48 (s, 1H), 2.01 – 1.93 (m, 3H), 1.70 – 1.51 (m, 12H), 1.30 (t,  $J = 7.1$  Hz, 3H).

$^{13}\text{C}$  NMR (101 MHz,  $\text{CDCl}_3$ )  $\delta$  166.4, 155.7 (q,  $J = 37.6$  Hz), 154.7 (q,  $J = 37.7$  Hz), 140.0, 140.8, 138.3, 133.9, 132.1, 131.7, 131.3, 129.9, 129.3, 128.2, 124.8, 122.3, 121.6, 115.9 (q,  $J = 288.7$  Hz), 115.7 (q,  $J = 288.7$  Hz), 113.9, 65.1, 61.1, 41.2, 37.2, 36.7, 28.7, 14.3.

$^{19}\text{F}$  NMR (376 MHz,  $\text{CDCl}_3$ )  $\delta$  -75.47, -75.86.

**HRMS** (ESI/Q-TOF): Exact mass calculated for  $[\text{C}_{32}\text{H}_{31}\text{BrF}_6\text{N}_2\text{O}_4 - \text{H}]^-$ ; requires  $m/z = 699.1298$ , found  $m/z = 699.1334$ .

**IR** (FT-ATR,  $\text{cm}^{-1}$ , thin film)  $\nu_{\text{max}} = 3384(\text{w})$ , 3279(bw), 2905(m), 2850(w), 1718(s), 1636(m), 1533(s), 1311(m), 1284(m), 1255(m), 1191(bs), 1157(bs), 1043(w), 979(w), 902(w), 758(m), 734(m).

**Optical:**  $[\alpha]_{\text{D}}^{20} = -19.1^\circ$  ( $er = 92:8$ ,  $c = 1.0$ ,  $\text{CHCl}_3$ )

**HPLC** (Chiralpak AD-H column, 5% *i*-PrOH in hexanes, 0.5 ml/min, 254 nm):  $t_{\text{R}}$  (major enantiomer) = 15.4 min,  $t_{\text{R}}$  (minor enantiomer) = 19.5 min.

*racemic sample:*

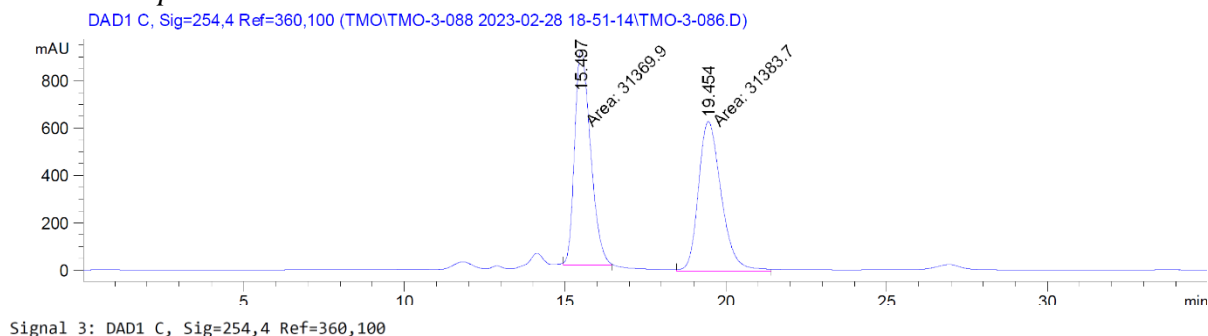

| Peak # | RetTime [min] | Type | Width [min] | Area [mAU*s] | Height [mAU] | Area %  |
|--------|---------------|------|-------------|--------------|--------------|---------|
| 1      | 15.497        | MM   | 0.5757      | 3.13699e4    | 908.12622    | 49.9890 |
| 2      | 19.454        | MM   | 0.8280      | 3.13837e4    | 631.72595    | 50.0110 |

Totals : 6.27536e4 1539.85217

*enantioselective sample:*

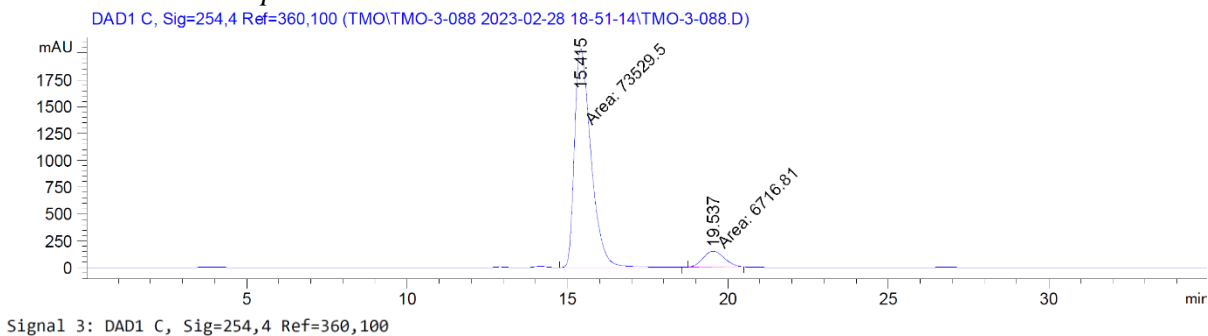

| Peak # | RetTime [min] | Type | Width [min] | Area [mAU*s] | Height [mAU] | Area %  |
|--------|---------------|------|-------------|--------------|--------------|---------|
| 1      | 15.415        | MM   | 0.6003      | 7.35295e4    | 2041.44958   | 91.6298 |
| 2      | 19.537        | MM   | 0.7610      | 6716.81250   | 147.09999    | 8.3702  |

Totals : 8.02463e4 2188.54958

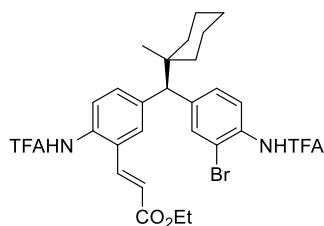

**Ethyl (R,E)-3-(5-((3-bromo-4-(2,2,2-trifluoroacetamido)phenyl)(1-methylcyclohexyl)-methyl)-2-(2,2,2-trifluoroacetamido)phenyl)acrylate (12)**

According to **GP D, S12** (128.9 mg, 0.20 mmol, 1.00 equiv.) was converted to **12**. Purification by automated column chromatography (Biotage, SNAP Ultra 10 g, gradient EtOAc in hexanes: 30 CV: 0-25%) yielded **12** as a white foam (47.8 mg, 0.07 mmol, 36% over 2 steps).

**R<sub>F</sub>**: 0.50 (hexanes/EtOAc 8:2)

**<sup>1</sup>H NMR** (400 MHz, CDCl<sub>3</sub>) δ 8.39 (s, 1H), 8.33 (s, 1H), 8.22 (d, *J* = 8.6 Hz, 1H), 7.74 (d, *J* = 15.9 Hz, 1H), 7.68 (d, *J* = 8.4 Hz, 1H), 7.59 (d, *J* = 2.0 Hz, 1H), 7.54 (d, *J* = 2.0 Hz, 1H), 7.51 (dd, *J* = 8.4, 2.1 Hz, 1H), 7.45 (dd, *J* = 8.6, 2.1 Hz, 1H), 6.38 (d, *J* = 15.8 Hz, 1H), 4.20 (q, *J* = 7.1 Hz, 2H), 3.79 (s, 1H), 1.57 – 1.47 (m, 3H), 1.48 – 1.37 (m, 2H), 1.36 – 1.29 (m, 4H), 1.28 (t, *J* = 7.2 Hz, 3H), 1.23 – 1.13 (m, 1H), 1.07 (s, 3H).

**<sup>13</sup>C NMR** (101 MHz, CDCl<sub>3</sub>) δ 166.5, 155.8 (q, *J* = 37.7 Hz), 154.7 (q, *J* = 37.8 Hz), 141.4, 141.2, 138.5, 134.0, 132.3, 131.6, 131.4, 130.1, 129.3, 128.3, 125.0, 122.0, 121.7, 115.9 (q, *J* = 288.8 Hz), 115.7 (q, *J* = 288.8 Hz), 114.0, 61.1, 37.8, 37.1, 37.1, 26.0, 21.9, 21.4, 14.3.

**<sup>19</sup>F NMR** (376 MHz, CDCl<sub>3</sub>) δ -75.47, -75.86.

**HRMS** (ESI/Q-TOF): Exact mass calculated for [C<sub>29</sub>H<sub>29</sub>BrF<sub>6</sub>N<sub>2</sub>O<sub>4</sub> – H]<sup>-</sup>; requires *m/z* = 663.1122, found *m/z* = 663.1281.

**IR** (FT-ATR, cm<sup>-1</sup>, thin film) ν<sub>max</sub> = 3384(w), 3281(bw), 2981(w), 2927(w), 2859(w), 1705(bs), 1529(bs), 1317(m), 1282(m), 1257(m), 1190(bs), 1155(bs), 1042(w), 980(w), 903(w), 867(w), 823(w), 758(m), 735(m).

**Optical**: [α]<sub>D</sub><sup>20</sup> = -18.8° (*er* = 94:6, *c* = 1.0, CHCl<sub>3</sub>)

**HPLC** (Chiralpak AD-H column, 2% *i*-PrOH in hexanes, 1.0 ml/min, 280 nm): *t<sub>R</sub>* (minor enantiomer) = 23.2 min, *t<sub>R</sub>* (major enantiomer) = 25.2 min.

*racemic sample*:

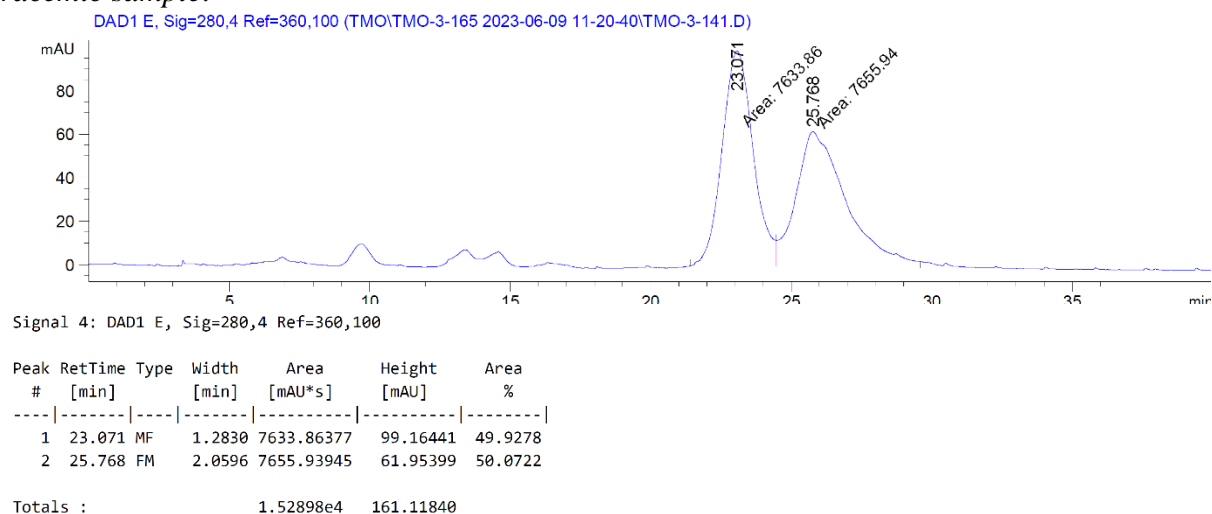

enantioselective sample:

DAD1 E, Sig=280,4 Ref=360,100 (TMO\TMO-3-165 2023-06-09 11-20-40\TMO-3-165.D)

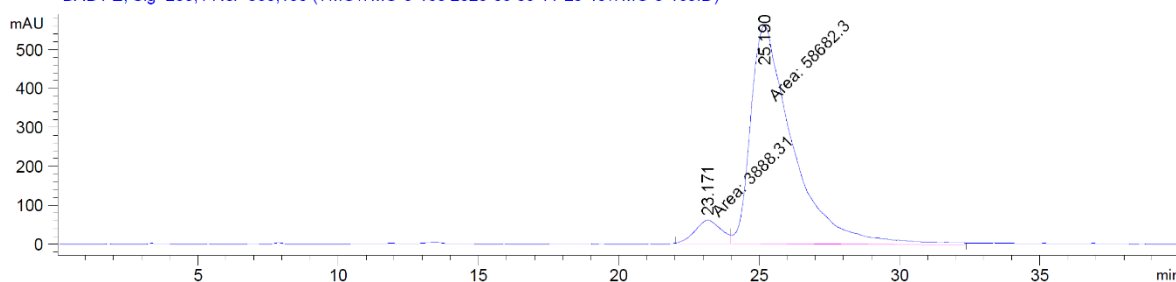

Signal 4: DAD1 E, Sig=280,4 Ref=360,100

| Peak # | RetTime [min] | Type | Width [min] | Area [mAU*s] | Height [mAU] | Area %  |
|--------|---------------|------|-------------|--------------|--------------|---------|
| 1      | 23.171        | MF   | 1.0752      | 3888.30811   | 60.27350     | 6.2143  |
| 2      | 25.190        | FM   | 1.7402      | 5.86823e4    | 562.02362    | 93.7857 |

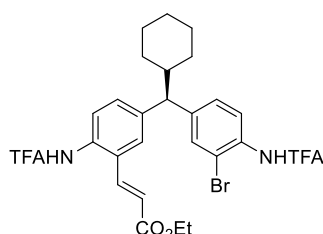

**Ethyl (R,E)-3-(5-((3-bromo-4-(2,2,2-trifluoroacetamido)phenyl)(cyclohexyl)methyl)-2-(2,2,2-trifluoroacetamido)phenyl)acrylate (13)**

According to **GP D, S2** (126.4 mg, 0.20 mmol, 1.00 equiv.) was converted to **13**. Purification by automated column chromatography (Biotage, SNAP Ultra 10 g, gradient EtOAc in hexanes: 17 CV: 0-30%) yielded **13** as a pale-yellow sticky oil (68.2 mg, 0.11 mmol, 53% over 2 steps)

**R<sub>F</sub>**: 0.39 (hexanes/EtOAc 8:2)

**<sup>1</sup>H NMR** (400 MHz, CDCl<sub>3</sub>) δ 8.36 (s, 1H), 8.21 (d, *J* = 8.5 Hz, 1H), 8.07 (s, 1H), 7.71 (d, *J* = 9.3 Hz, 1H), 7.68 (d, *J* = 1.8 Hz, 1H), 7.45 (d, *J* = 2.0 Hz, 1H), 7.42 (d, *J* = 2.0 Hz, 1H), 7.34 (dd, *J* = 8.4, 2.0 Hz, 1H), 7.29 (dd, *J* = 8.5, 2.0 Hz, 1H), 6.39 (d, *J* = 15.8 Hz, 1H), 4.23 (q, *J* = 7.1 Hz, 2H), 3.49 (d, *J* = 10.8 Hz, 1H), 2.12 – 2.00 (m, 1H), 1.73 – 1.53 (m, 4H), 1.34 – 1.12 (m, 7H), 0.93 – 0.82 (m, 2H).

**<sup>13</sup>C NMR** (101 MHz, CDCl<sub>3</sub>) δ 166.3, 155.7 (q, *J* = 37.8 Hz), 154.8 (q, *J* = 38.1 Hz), 143.3, 143.1, 138.1, 132.2, 131.6, 131.2, 130.4, 128.8, 128.2, 127.5, 125.5, 122.5, 122.4, 115.9 (q, *J* = 288.8 Hz), 115.7 (q, *J* = 288.8 Hz), 114.5, 61.1, 58.3, 41.1, 32.0, 26.4, 26.2, 14.3.

**<sup>19</sup>F NMR** (376 MHz, CDCl<sub>3</sub>) δ -75.51, -75.89.

**HRMS** (ESI/Q-TOF): Exact mass calculated for [C<sub>28</sub>H<sub>27</sub>BrF<sub>6</sub>N<sub>2</sub>O<sub>4</sub> – H]<sup>–</sup>; requires *m/z* = 647.0986, found *m/z* = 647.1023.

**IR** (FT-ATR, cm<sup>–1</sup>, thin film) ν<sub>max</sub> = 3385(w), 3278(bw), 2931(m), 2853(w), 1718(bs), 1533(s), 1319(w), 1285(m), 1255(m), 1158(bs), 1043(w), 979(w), 904(w), 757(w), 734(w).

**Optical**: [α]<sub>D</sub><sup>20</sup> = –13.4° (*er* = 84:16, *c* = 1.0, CHCl<sub>3</sub>).

**HPLC** (Chiralpak AD-H column, 5% *i*-PrOH in hexanes, 0.5 ml/min, 254 nm): t<sub>R</sub> (major enantiomer) = 15.7 min, t<sub>R</sub> (minor enantiomer) = 19.7 min.

racemic sample:

DAD1 C, Sig=254,4 Ref=360,100 (TMO\TMO-3-032 2023-01-09 11-43-14\TMO-3-035.D)

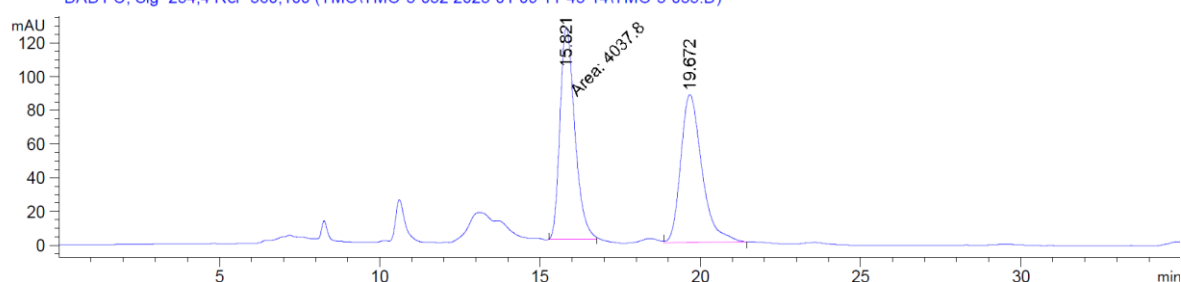

Signal 3: DAD1 C, Sig=254,4 Ref=360,100

| Peak # | RetTime [min] | Type | Width [min] | Area [mAU*s] | Height [mAU] | Area %  |
|--------|---------------|------|-------------|--------------|--------------|---------|
| 1      | 15.821        | MM   | 0.5344      | 4037.79932   | 125.92918    | 49.9942 |
| 2      | 19.672        | VB   | 0.7007      | 4038.73608   | 87.79043     | 50.0058 |

Totals : 8076.53540 213.71960

enantioselective sample:

DAD1 C, Sig=254,4 Ref=360,100 (TMO\TMO-3-032 2023-01-09 11-43-14\TMO-3-032.D)

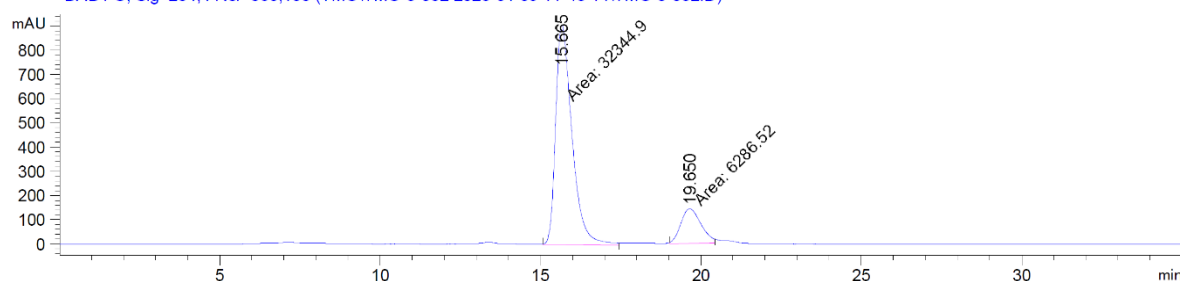

Signal 3: DAD1 C, Sig=254,4 Ref=360,100

| Peak # | RetTime [min] | Type | Width [min] | Area [mAU*s] | Height [mAU] | Area %  |
|--------|---------------|------|-------------|--------------|--------------|---------|
| 1      | 15.665        | MM   | 0.5940      | 3.23449e4    | 907.48639    | 83.7269 |
| 2      | 19.650        | MM   | 0.7304      | 6286.52490   | 143.44273    | 16.2731 |

Totals : 3.86314e4 1050.92912

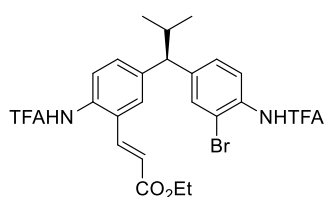

### Ethyl (R,E)-3-(5-(1-(3-bromo-4-(2,2,2-trifluoroacetamido)phenyl)-2-methylpropyl)-2-(2,2,2-trifluoroacetamido)phenyl)acrylate (**14**)

According to **GP D, S13** (118.0 mg, 0.20 mmol, 1.00 equiv.) was converted to **14**. Purification by automated column chromatography (Biotage, SNAP Ultra 10 g, gradient EtOAc in hexanes: 23 CV: 0-25%) yielded **14** as a white foam (52.5 mg, 0.09 mmol, 43% over 2 steps).

**R<sub>F</sub>**: 0.35 (hexanes/EtOAc 8:2)

**<sup>1</sup>H NMR** (400 MHz, CDCl<sub>3</sub>) δ 8.37 (s, 1H), 8.21 (d, *J* = 8.7 Hz, 2H), 7.76 – 7.64 (m, 2H), 7.45 (dd, *J* = 12.5, 2.0 Hz, 2H), 7.35 (dd, *J* = 8.4, 2.1 Hz, 1H), 7.29 (dd, *J* = 8.5, 2.0 Hz, 1H), 6.39 (d, *J* = 15.8 Hz, 1H), 4.21 (q, *J* = 7.1 Hz, 2H), 3.42 (d, *J* = 10.8 Hz, 1H), 2.44 (dsept, *J* = 10.7, 6.5 Hz, 1H), 1.29 (t, *J* = 7.1 Hz, 3H), 0.89 (t, *J* = 6.1 Hz, 6H).

$^{13}\text{C}$  NMR (101 MHz,  $\text{CDCl}_3$ )  $\delta$  166.4, 155.8 (q,  $J = 37.7$  Hz), 154.8 (q,  $J = 37.8$  Hz), 143.6, 143.4, 138.2, 132.0, 131.6, 131.3, 130.3, 128.8, 128.1, 127.2, 125.6, 122.4, 122.3, 116.0 (q,  $J = 288.6$  Hz), 115.7 (q,  $J = 288.6$  Hz), 114.5, 61.1, 59.5, 31.8, 21.7, 14.3.

$^{19}\text{F}$  NMR (376 MHz,  $\text{CDCl}_3$ )  $\delta$  -75.48, -75.88.

HRMS (ESI/Q-TOF): Exact mass calculated for  $[\text{C}_{25}\text{H}_{23}\text{BrF}_6\text{N}_2\text{O}_4 - \text{H}]^-$ ; requires  $m/z = 607.0673$ , found  $m/z = 607.0677$ .

IR (FT-ATR,  $\text{cm}^{-1}$ , thin film)  $\nu_{\text{max}} = 3385(\text{w})$ , 3268(bw), 2970(w), 2935(w), 2909(w), 2875(w), 1700(s), 1636(m), 1583(m), 1533(s), 1490(m), 1369(m), 1319(m), 1281(s), 1254(s), 1190(bs), 1152(bs), 1042(m), 979(m), 902(m), 827(w), 757(m), 734(m).

Optical:  $[\alpha]_{\text{D}}^{20} = -14.0^\circ$  ( $er = 82:18$ ,  $c = 1.0$ ,  $\text{CHCl}_3$ ).

HPLC (Chiralpak IB column, 35% *i*-PrOH in hexanes, 1.0 ml/min, 254 nm):  $t_{\text{R}}$  (major enantiomer) = 4.7 min,  $t_{\text{R}}$  (minor enantiomer) = 12.9 min.

racemic sample:

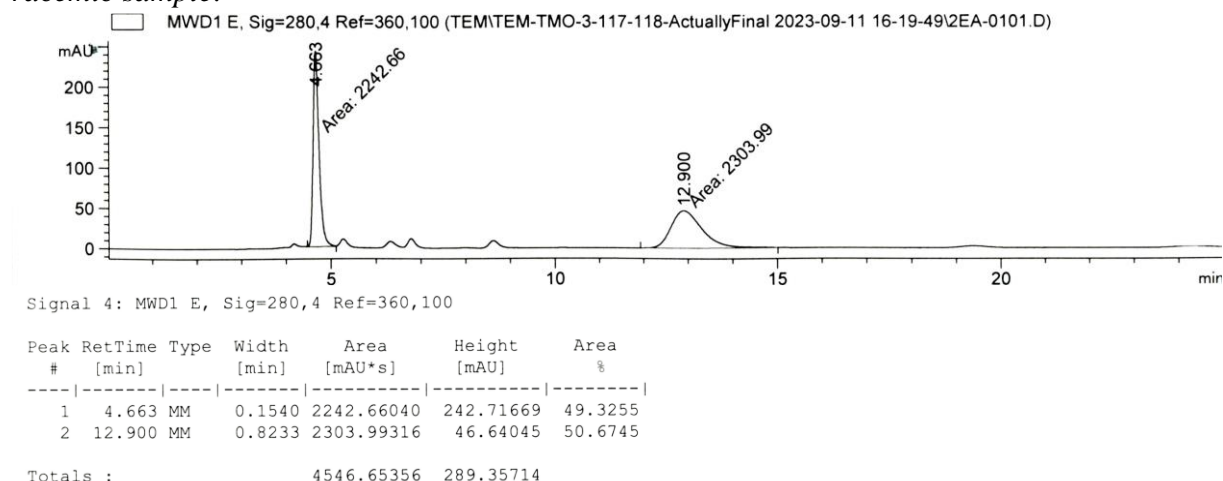

enantioselective sample:

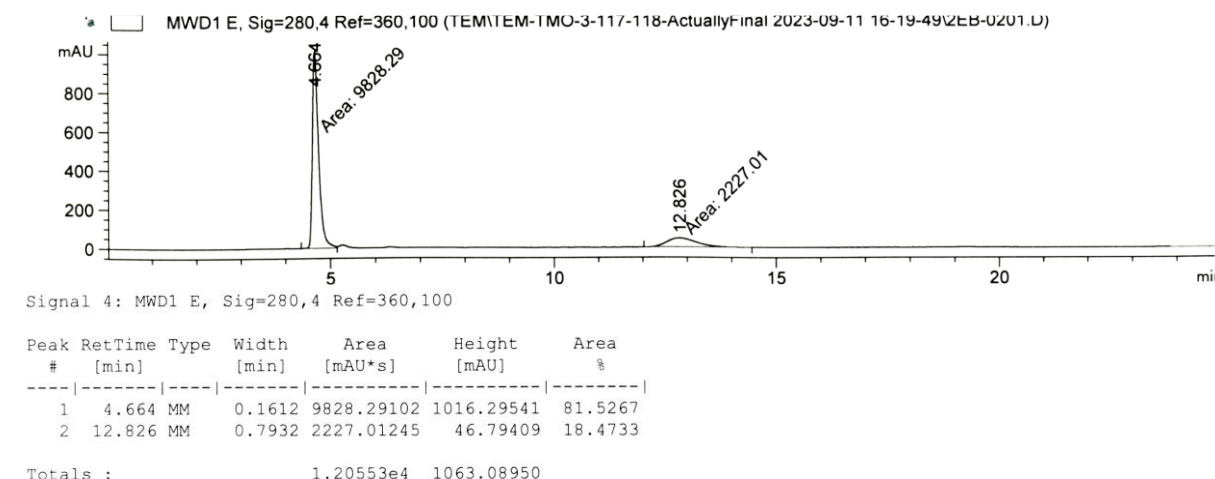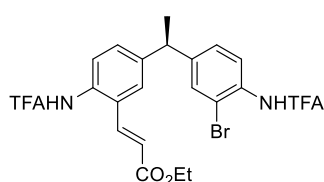



**Ethyl (R,E)-3-(5-(1-(3-bromo-4-(2,2,2-trifluoroacetamido)phenyl)ethyl)-2-(2,2,2-trifluoroacetamido)phenyl)acrylate (15)**

According to **GP D, S3** (112.4 mg, 0.20 mmol, 1.00 equiv.) was converted to **15**. Purification by automated column chromatography (Biotage, SNAP Ultra 10 g, gradient EtOAc in hexanes: 20 CV: 0-30%) yielded **15** as a white foam (24.0 mg, 0.04 mmol, 21% over 2 steps)

**RF:** 0.33 (hexanes/EtOAc 8:2)

**<sup>1</sup>H NMR** (400 MHz, CDCl<sub>3</sub>) δ 8.39 (s, 1H), 8.22 (d, *J* = 8.5 Hz, 1H), 8.03 (s, 1H), 7.71 (d, *J* = 9.1 Hz, 1H), 7.68 (d, *J* = 1.6 Hz, 1H), 7.40 (dd, *J* = 8.1, 2.0 Hz, 2H), 7.29 – 7.26 (m, 1H), 7.22 (dd, *J* = 8.5, 2.1 Hz, 1H), 6.37 (d, *J* = 15.8 Hz, 1H), 4.24 (q, *J* = 7.1 Hz, 2H), 4.15 (q, *J* = 7.1 Hz, 1H), 1.64 (d, *J* = 7.3 Hz, 3H), 1.31 (t, *J* = 7.1 Hz, 3H).

**<sup>13</sup>C NMR** (101 MHz, CDCl<sub>3</sub>) δ 166.3, 155.5 (d, *J* = 95.8 Hz), 145.0, 144.9, 138.0, 131.6, 131.2, 130.2, 128.9, 128.0, 126.8, 125.5, 122.6, 122.3, 115.9 (q, *J* = 288.6 Hz), 115.7 (q, *J* = 288.6 Hz), 114.6, 61.1, 43.8, 21.6, 14.3.

**<sup>19</sup>F NMR** (376 MHz, CDCl<sub>3</sub>) δ -75.47, -75.86.

**HRMS** (ESI/Q-TOF): Exact mass calculated for [C<sub>23</sub>H<sub>19</sub>BrF<sub>6</sub>N<sub>2</sub>O<sub>4</sub> – H]<sup>–</sup>; requires *m/z* = 579.0360, found *m/z* = 579.0395.

**IR** (FT-ATR, cm<sup>-1</sup>, thin film) *v*<sub>max</sub> = 3384(w), 3271(bm), 2977(w), 2925(w), 2851(w), 1715(s), 1636(w), 1584(w), 1533(m), 1320(w), 1283(m), 1253(m), 1194(bs), 1159(bs), 1043(w), 979(w), 915(w), 867(w), 829(w), 759(w), 727(w).

**Optical:** [α]<sub>D</sub><sup>20</sup> = –0.8° (*er* = 55:45, *c* = 1.0, CHCl<sub>3</sub>).

**HPLC** (Chiralpak AD-H column, 5% *i*-PrOH in hexanes, 0.5 mL/min, 254 nm): *t*<sub>R</sub> (minor enantiomer) = 26.3 min, *t*<sub>R</sub> (major enantiomer) = 28.4 min.

*racemic sample:*

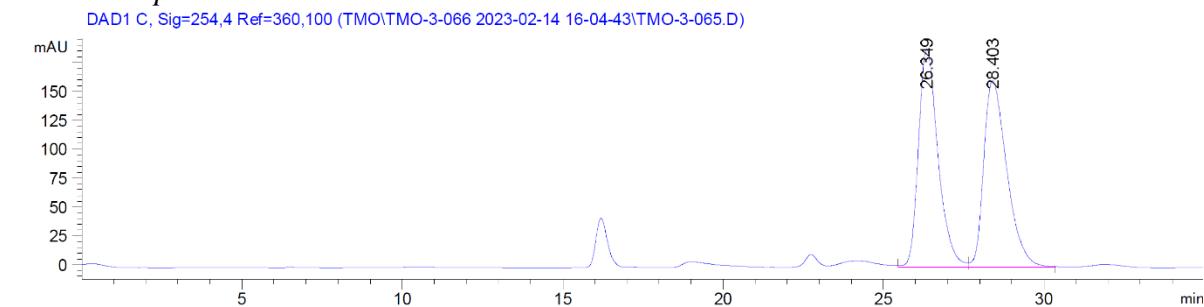

*enantioselective sample:*

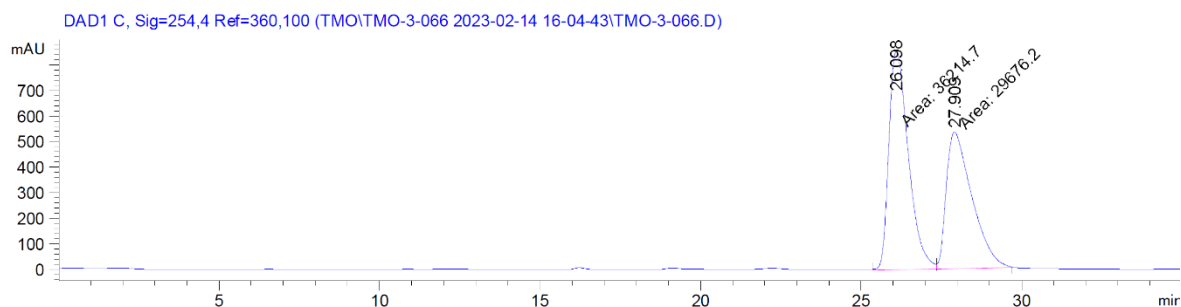

| Peak # | RetTime [min] | Type | Width [min] | Area [mAU*s] | Height [mAU] | Area %  |
|--------|---------------|------|-------------|--------------|--------------|---------|
| 1      | 26.098        | MF   | 0.7043      | 3.62147e4    | 856.92975    | 54.9616 |
| 2      | 27.909        | FM   | 0.9247      | 2.96762e4    | 534.90387    | 45.0384 |

Totals : 6.58909e4 1391.83362

### 5.3 Preparation and Characterization of Asymmetric Aromatic Finkelstein / Larock Sequence Product

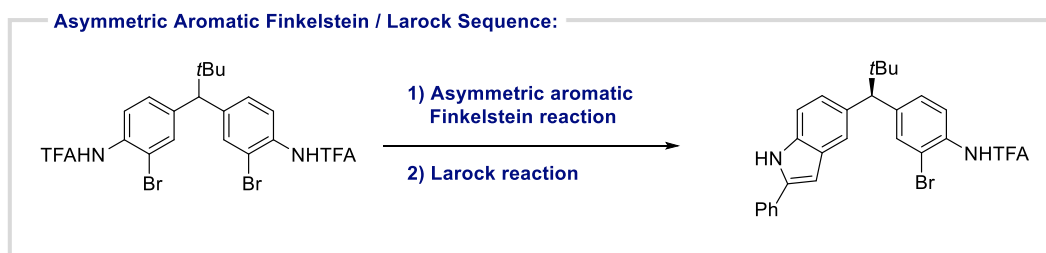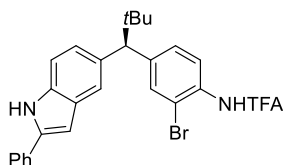

#### (R)-N-(2-Bromo-4-(2,2-dimethyl-1-(2-phenyl-1H-indol-5-yl)propyl)phenyl)-2,2,2-trifluoroacetamide (5)

A 1-dram vial equipped with stir bar and septum cap was charged with **1** (120.8 mg, 0.20 mmol, 1.00 equiv.),  $\text{Cu}(\text{MeCN})_4\text{BF}_4$  (4.4 mg, 14.0  $\mu\text{mol}$ , 0.07 equiv.), **L9** (15.9 mg, 0.03 mmol, 0.15 equiv.),  $\text{K}_3\text{PO}_4$  (169.8 mg, 0.80 mmol, 4.00 equiv.) and NaI (36.0 mg, 0.24 mmol, 1.20 equiv.). The vial was evacuated and backfilled with  $\text{N}_2$  (3x) before dry MeCN (0.3 mL, 0.66 M) was added. The reaction mixture was heated at 50 °C for 16 h. After cooling to r.t., the mixture was filtered through a plug of  $\text{SiO}_2$  (eluted with EtOAc), transferred into a scintillation vial and concentrated *in vacuo*.

To the vial containing the crude material was added a stir bar, CuI (5.7 mg, 0.03 mmol, 0.15 equiv.), triphenylphosphine (15.7 mg, 0.06 mmol, 0.30 equiv.) and  $\text{K}_3\text{PO}_4$  (84.9 mg, 0.40 mmol, 2.00 equiv.). Following evacuation and back-filling with  $\text{N}_2$  (3x), degassed 1,4-dioxane (1.0 mL, 0.2 M) and phenylacetylene (20.4  $\mu\text{L}$ , 0.20 mmol, 1.00 equiv.) was added. The vial was sealed and heated at 110 °C for 24 h. The reaction mixture was cooled to r.t. and filtered through a plug of  $\text{SiO}_2$  (eluted with EtOAc). Purification by automated reverse-phase column chromatography (Biotage, SNAP C18 Ultra 12 g, gradient MeCN in  $\text{H}_2\text{O}$  (with 0.1%

formic acid buffer): 15 CV: 0-100%; 10 CV: 100%) yielded the desired product as a white foam (40.0 mg, 0.08 mmol, 38% over 2 steps).

### Synthesis of racemic **5**:

A 1-dram vial equipped with stir bar and septum cap was charged with **1** (60.4 mg, 0.10 mmol, 1.00 equiv.), Pd(PPh<sub>3</sub>)<sub>4</sub> (2.9 mg, 2.50 μmol, 0.025 equiv.), CuI (1.9 mg, 0.01 mmol, 0.10 equiv.) and K<sub>3</sub>PO<sub>4</sub> (63.7 mg, 0.30 mmol, 3.00 equiv.). The vial was evacuated and backfilled with N<sub>2</sub> (3x) before dry toluene (0.5 mL, 0.2 M) and phenylacetylene (12.1 μL, 0.11 mmol, 1.10 equiv.) was added. The reaction mixture was heated at 100 °C for 20 h. After cooling to r.t., the mixture was filtered through a plug of SiO<sub>2</sub> (eluted with EtOAc), concentrated *in vacuo* and purified by automated reverse-phase column chromatography (Biotage, SNAP C18 Ultra 12 g, gradient MeCN in H<sub>2</sub>O (with 0.1% formic acid buffer): 15 CV: 0-100%; 10 CV: 100%).

**R<sub>F</sub>**: 0.50 (hexanes/EtOAc 8:2)

**<sup>1</sup>H NMR** (400 MHz, CDCl<sub>3</sub>) δ 8.39 – 8.31 (m, 2H), 8.21 (d, *J* = 8.5 Hz, 1H), 7.70 (d, *J* = 2.0 Hz, 1H), 7.66 – 7.61 (m, 3H), 7.55 (dd, *J* = 8.6, 2.1 Hz, 1H), 7.44 (t, *J* = 7.6 Hz, 2H), 7.36 – 7.28 (m, 2H), 7.20 (dd, *J* = 8.4, 1.7 Hz, 1H), 6.79 (s, 1H), 3.80 (s, 1H), 1.08 (s, 9H).

**<sup>13</sup>C NMR** (101 MHz, CDCl<sub>3</sub>) δ 154.7 (q, *J* = 37.8 Hz), 144.1, 138.5, 135.7, 134.0, 133.8, 132.5, 131.0, 130.1, 129.4, 129.2, 127.9, 125.3, 124.7, 121.4, 121.4, 117.2 (d, *J* = 289.0 Hz), 113.7, 110.6, 100.1, 63.7, 35.5, 29.5.

**<sup>19</sup>F NMR** (376 MHz, CDCl<sub>3</sub>) δ -75.85.

**HRMS** (ESI/Q-TOF): Exact mass calculated for [C<sub>27</sub>H<sub>24</sub>BrF<sub>3</sub>N<sub>2</sub>O – H]<sup>-</sup>; requires *m/z* = 527.0951, found *m/z* = 527.0944.

**IR** (FT-ATR, cm<sup>-1</sup>, thin film) *v*<sub>max</sub> = 3383(bw), 2952(w), 2906(w), 2869(w), 1734(s), 1539(s), 1364(m), 1286(s), 1190(bs), 1157(bs), 1041(m), 902(m), 875(m), 756(s), 745(s), 690(s).

**Optical**: [α]<sub>D</sub><sup>20</sup> = +16.2° (*er* = 89:11, *c* = 1.0, CHCl<sub>3</sub>).

**HPLC** (Chiralpak AD-H column, 20% EtOH in hexanes, 1.0 ml/min, 245 nm): *t<sub>R</sub>* (minor enantiomer) = 10.9 min, *t<sub>R</sub>* (major enantiomer) = 17.3 min.

*racemic sample*:

DAD1 C, Sig=245,4 Ref=360,100 (TMO/TMO-3-176 2023-07-10 15-36-26/TMO-3-126.D)

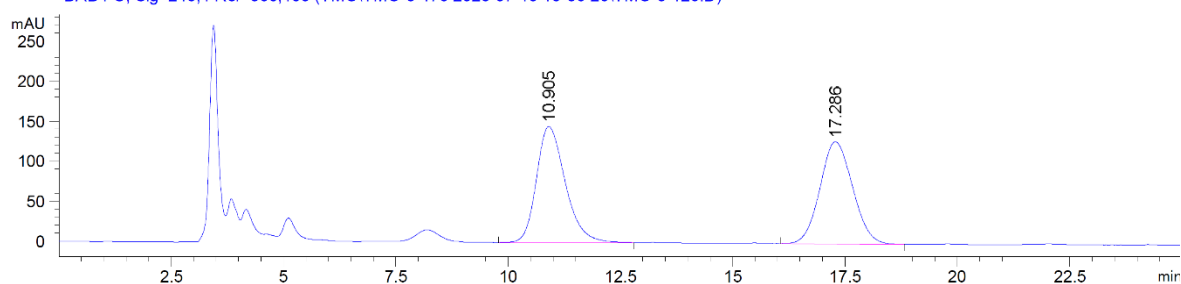

Signal 3: DAD1 C, Sig=245,4 Ref=360,100

| Peak # | RetTime [min] | Type | Width [min] | Area [mAU*s] | Height [mAU] | Area %  |
|--------|---------------|------|-------------|--------------|--------------|---------|
| 1      | 10.905        | BB   | 0.6879      | 6469.28076   | 145.16531    | 49.9640 |
| 2      | 17.286        | VB   | 0.7551      | 6478.61182   | 127.87296    | 50.0360 |

Totals : 1.29479e4 273.03827

enantioselective sample:

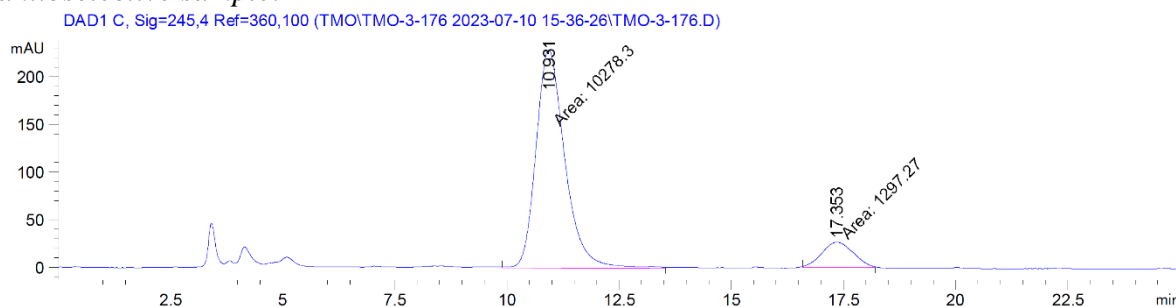

Signal 3: DAD1 C, Sig=245,4 Ref=360,100

| Peak # | RetTime [min] | Type | Width [min] | Area [mAU*s] | Height [mAU] | Area %  |
|--------|---------------|------|-------------|--------------|--------------|---------|
| 1      | 10.931        | MM   | 0.7478      | 1.02783e4    | 229.09161    | 88.7930 |
| 2      | 17.353        | MM   | 0.8150      | 1297.26660   | 26.53058     | 11.2070 |

Totals : 1.15755e4 255.62220

## 5.4 Preparation and Characterization of Asymmetric Aromatic Finkelstein / Suzuki Sequence Product

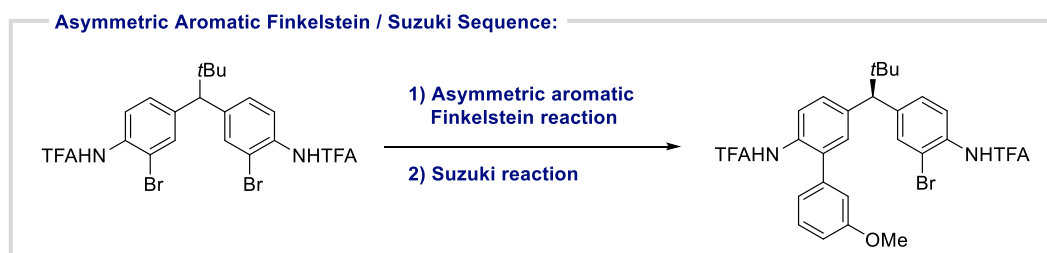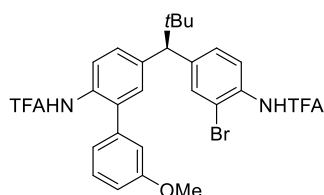

### (R)-N-(2-Bromo-4-(1-(3'-methoxy-6-(2,2,2-trifluoroacetamido)-[1,1'-biphenyl]-3-yl)-2,2-dimethylpropyl)phenyl)-2,2,2-trifluoroacetamide (**6**)

A 1-dram vial equipped with stir bar and septum cap was charged with **1** (120.8 mg, 0.20 mmol, 1.00 equiv.),  $\text{Cu}(\text{MeCN})_4\text{BF}_4$  (4.4 mg, 14.0  $\mu\text{mol}$ , 0.07 equiv.), **L9** (15.9 mg, 0.03 mmol, 0.15 equiv.),  $\text{K}_3\text{PO}_4$  (169.8 mg, 0.80 mmol, 4.00 equiv.) and NaI (36.0 mg, 0.24 mmol, 1.20 equiv.). The vial was evacuated and backfilled with  $\text{N}_2$  (3x) before dry MeCN (0.3 mL, 0.66 M) was added. The reaction mixture was heated at 50 °C for 16 h. After cooling to r.t., the mixture was filtered through a plug of  $\text{SiO}_2$  (eluted with EtOAc), transferred into a scintillation vial and concentrated *in vacuo*.

To the vial containing the crude material was added a stir bar and  $\text{Pd}(\text{OAc})_2$  (4.5 mg, 0.02 mmol, 0.10 equiv.) and 3-methoxyphenylboronic acid (42.5 mg, 0.28 mmol, 1.40 equiv.). Following evacuation and back-filling with  $\text{N}_2$  (3x), dry toluene (1.0 mL, 0.2 M) and  $\text{Et}_3\text{N}$  (38.8  $\mu\text{L}$ , 0.28 mmol, 1.40 equiv.) was added. The vial was sealed and heated at 100 °C for 24 h. The reaction mixture was cooled to r.t., filtered through a plug of  $\text{SiO}_2$  (eluted with

EtOAc) and concentrated. Purification by automated column chromatography (Biotage, SNAP Ultra 10 g, gradient EtOAc in hexanes, 25 CV: 0-25%) yielded **6** as white solid (38.0 mg, 0.06 mmol, 30%).

### Synthesis of racemic **6**:

A 1-dram vial equipped with stir bar and septum cap was charged with **1** (60.4 mg, 0.10 mmol, 1.00 equiv.), Pd(PPh<sub>3</sub>)<sub>4</sub> (2.9 mg, 2.50 μmol, 0.025 equiv.), CuI (1.9 mg, 0.01 mmol, 0.10 equiv.) and K<sub>3</sub>PO<sub>4</sub> (63.7 mg, 0.30 mmol, 3.00 equiv.). The vial was evacuated and backfilled with N<sub>2</sub> (3x) before dry toluene (0.5 mL, 0.2 M) and phenylacetylene (12.1 μL, 0.11 mmol, 1.10 equiv.) was added. The reaction mixture was heated at 100 °C for 20 h. After cooling to r.t., the mixture was filtered through a plug of SiO<sub>2</sub> (eluted with EtOAc), concentrated *in vacuo* and purified by automated reverse-phase column chromatography (Biotage, SNAP C18 Ultra 12 g, gradient MeCN in H<sub>2</sub>O (with 0.1% formic acid buffer): 15 CV: 0-100%; 10 CV: 100%).

**R<sub>F</sub>**: 0.40 (hexanes/EtOAc 8:2)

**<sup>1</sup>H NMR** (400 MHz, CDCl<sub>3</sub>) δ 8.38 (s, 1H), 8.24 (dd, *J* = 11.9, 8.5 Hz, 2H), 8.05 (s, 1H), 7.62 (d, *J* = 2.0 Hz, 1H), 7.49 – 7.41 (m, 3H), 7.30 (d, *J* = 2.2 Hz, 1H), 7.00 (ddd, *J* = 8.3, 2.5, 1.0 Hz, 1H), 6.94 – 6.88 (m, 1H), 6.88 – 6.82 (m, 1H), 3.85 (s, 3H), 3.72 (s, 1H), 1.04 (s, 9H).

**<sup>13</sup>C NMR** (101 MHz, CDCl<sub>3</sub>) δ 160.5, 155.1 (q, *J* = 37.5 Hz), 154.8 (q, *J* = 37.9 Hz), 142.4, 140.1, 138.1, 133.8, 132.8, 131.6, 131.6, 130.8, 130.8, 129.9, 129.8, 121.7, 121.2, 121.0, 115.9 (q, *J* = 288.5 Hz), 115.5 (q, *J* = 288.5 Hz), 114.7, 114.4, 113.9, 63.2, 55.5, 35.5, 29.3.

**<sup>19</sup>F NMR** (376 MHz, CDCl<sub>3</sub>) δ -75.88, -76.03.

**HRMS** (ESI/Q-TOF): Exact mass calculated for [C<sub>28</sub>H<sub>25</sub>BrF<sub>6</sub>N<sub>2</sub>O<sub>3</sub> – H]<sup>-</sup>; requires *m/z* = 629.0880, found *m/z* = 629.0887.

**IR** (FT-ATR, cm<sup>-1</sup>, thin film) ν<sub>max</sub> = 3387(w), 3298(bw), 2963(bw), 2870(w), 1734(s), 1597(m), 1533(s), 1477(m), 1286(m), 1243(m), 1197(bs), 1159(s), 1039(w), 903(w), 833(w), 760(w), 735(w).

**Optical**: [α]<sub>D</sub><sup>20</sup> = -4.2° (*er* = 91:9, *c* = 1.0, CHCl<sub>3</sub>).

**HPLC** (Chiralpak AD-H column, 1% *i*-PrOH in hexanes, 1.0 ml/min, 254 nm): *t<sub>R</sub>* (minor enantiomer) = 20.6 min, *t<sub>R</sub>* (major enantiomer) = 22.4 min.

*racemic sample*:

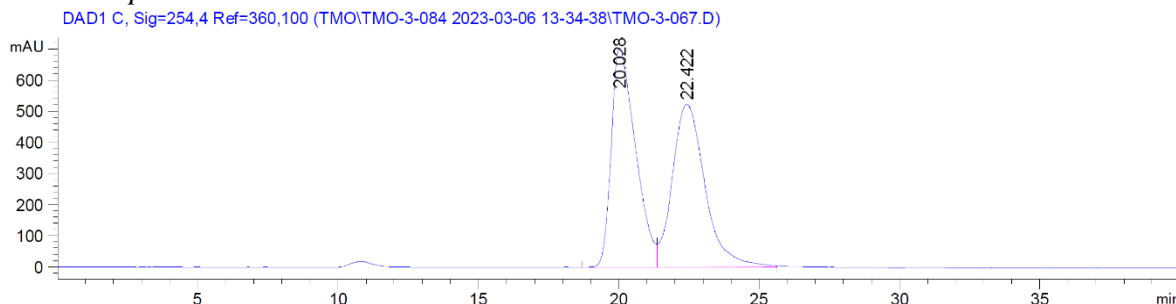

Signal 3: DAD1 C, Sig=254,4 Ref=360,100

| Peak # | RetTime [min] | Type | Width [min] | Area [mAU*s] | Height [mAU] | Area %  |
|--------|---------------|------|-------------|--------------|--------------|---------|
| 1      | 20.028        | BV   | 0.8987      | 4.23142e4    | 704.50958    | 49.8675 |
| 2      | 22.422        | VV   | 1.2121      | 4.25392e4    | 523.46753    | 50.1325 |

Totals : 8.48534e4 1227.97711

enantioselective sample:

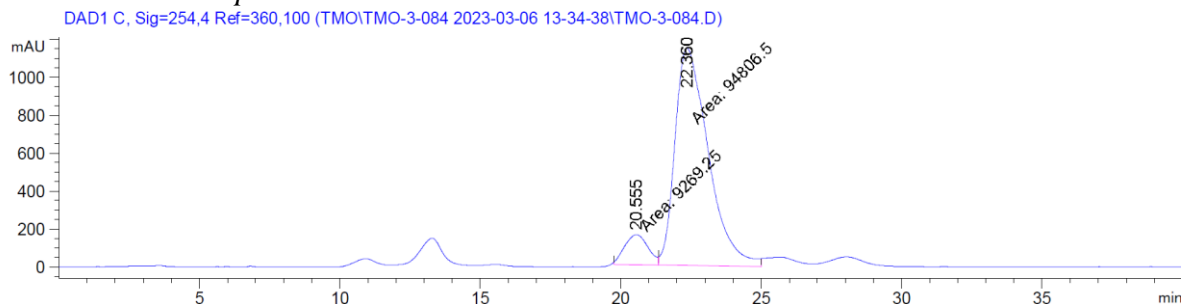

Signal 3: DAD1 C, Sig=254,4 Ref=360,100

| Peak # | RetTime [min] | Type | Width [min] | Area [mAU*s] | Height [mAU] | Area %  |
|--------|---------------|------|-------------|--------------|--------------|---------|
| 1      | 20.555        | MF   | 0.9676      | 9269.24707   | 159.65927    | 8.9063  |
| 2      | 22.360        | FM   | 1.3777      | 9.48065e4    | 1146.93567   | 91.0937 |

Totals : 1.04076e5 1306.59494

## 5.5 Preparation and Characterization of Asymmetric Aromatic Finkelstein / Dehalogenation Sequence Product

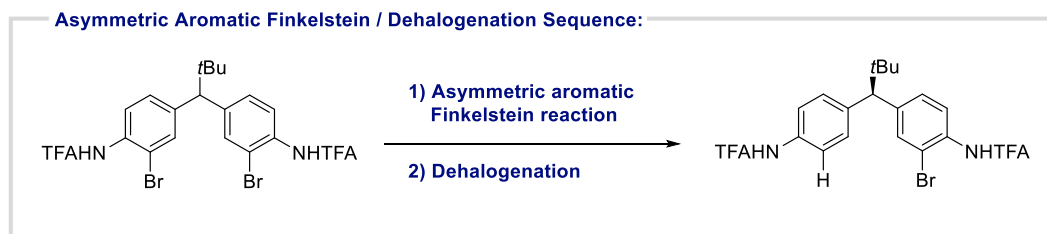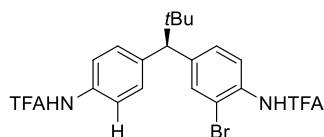

### (R)-N-(4-(1-(3-Bromo-4-(2,2,2-trifluoroacetamido)phenyl)-2,2-dimethylpropyl)phenyl)-2,2,2-trifluoroacetamide (7)

A 1-dram vial equipped with stir bar and septum cap was charged with **1** (120.8 mg, 0.20 mmol, 1.00 equiv.),  $\text{Cu}(\text{MeCN})_4\text{BF}_4$  (4.4 mg, 14.0  $\mu\text{mol}$ , 0.07 equiv.), **L9** (15.9 mg, 0.03 mmol, 0.15 equiv.),  $\text{K}_3\text{PO}_4$  (169.8 mg, 0.80 mmol, 4.00 equiv.) and NaI (36.0 mg, 0.24 mmol, 1.20 equiv.). The vial was evacuated and backfilled with  $\text{N}_2$  (3x) before dry MeCN (0.3 mL, 0.66 M) was added. The reaction mixture was heated at 50 °C for 16 h. After cooling to r.t., the mixture was filtered through a plug of  $\text{SiO}_2$  (eluted with EtOAc), transferred into a scintillation vial and concentrated *in vacuo*.

To the vial containing the crude material was added a stir bar and Pd(OAc)<sub>2</sub> (4.5 mg, 0.02 mmol, 0.10 equiv.) and NaBH<sub>4</sub> (7.2 mg, 0.19 mmol, 0.95 equiv.). Following evacuation and back-filling with N<sub>2</sub> (3x), dry DMF (1.0 mL, 0.2 M) and TMEDA (39.2 μL, 0.26 mmol, 1.30 equiv.) was added. The vial was sealed and heated at 100 °C for 3 h. The reaction mixture was cooled to r.t., filtered through cotton (eluted with EtOAc) and concentrated by air stream evaporation. Purification by automated column chromatography (Biotage, SNAP Ultra 10 g, gradient EtOAc in hexanes, 20 CV: 0-25%) yielded **7** as white solid (42.1 mg, 0.08 mmol, 40%).

### Synthesis of racemic **7**:

A 1-dram vial equipped with stir bar and septum cap was charged with **1** (60.4 mg, 0.10 mmol, 1.00 equiv.), Pd<sub>2</sub>dba<sub>3</sub> (4.6 mg, 5.00 μmol, 0.05 equiv.), SPhos (4.1 mg, 0.01 mmol, 0.10 equiv.), NaBH<sub>4</sub> (3.8 mg, 0.10 mmol, 1.00 equiv.) and K<sub>3</sub>PO<sub>4</sub> (63.7 mg, 0.30 mmol, 3.00 equiv.). The vial was evacuated and backfilled with N<sub>2</sub> (3x) before dry toluene (0.5 mL, 0.2 M) and TMEDA (19.6 μL, 0.13 mmol, 1.30 equiv.) was added. The reaction mixture was heated at 100 °C for 18 h. After cooling to r.t., the mixture was filtered through a plug of SiO<sub>2</sub> (eluted with EtOAc), concentrated *in vacuo* and purified by automated column chromatography (Biotage, SNAP Ultra 10 g, gradient EtOAc in hexanes: 25 CV: 0-25%).

**R<sub>F</sub>**: 0.25 (hexanes/EtOAc 8:2)

**<sup>1</sup>H NMR** (400 MHz, CDCl<sub>3</sub>) δ 8.37 (s, 1H), 8.21 (d, *J* = 8.6 Hz, 1H), 7.89 (s, 1H), 7.61 (d, *J* = 2.1 Hz, 1H), 7.51 (d, *J* = 8.6 Hz, 2H), 7.44 (dd, *J* = 8.6, 2.1 Hz, 1H), 7.39 (d, *J* = 8.6 Hz, 2H), 3.69 (s, 1H), 1.02 (s, 9H).

**<sup>13</sup>C NMR** (101 MHz, CDCl<sub>3</sub>) δ 154.9 (q, *J* = 37.0 Hz), 154.8 (q, *J* = 37.0 Hz), 142.5, 140.4, 133.7, 131.5, 130.6, 129.9, 121.6, 120.4, 115.8 (q, *J* = 288.8 Hz), 115.7 (q, *J* = 288.8 Hz), 113.9, 63.1, 35.4, 29.2.

**<sup>19</sup>F NMR** (376 MHz, CDCl<sub>3</sub>) δ -75.72, -75.87.

**HRMS** (ESI/Q-TOF): Exact mass calculated for [C<sub>21</sub>H<sub>19</sub>BrF<sub>6</sub>N<sub>2</sub>O<sub>2</sub> - H]<sup>-</sup>; requires *m/z* = 523.04613, found *m/z* = 523.0463.

**IR** (FT-ATR, cm<sup>-1</sup>, thin film) *v*<sub>max</sub> = 3383(w), 3299(bw), 2964(w), 2925(w), 2874(w), 1715(s), 1605(w), 1533(m), 1285(m), 1247(m), 1189(bs), 1154(bs), 1044(w), 902(w), 837(w), 760(m), 733(m).

**Optical**: [α]<sub>D</sub><sup>20</sup> = -5.9° (*er* = 92:8, *c* = 1.0, CHCl<sub>3</sub>).

**HPLC** (Chiralpak AD-H column, 5% *i*-PrOH in hexanes, 0.5 ml/min, 254 nm): *t<sub>R</sub>* (major enantiomer) = 26.9 min, *t<sub>R</sub>* (minor enantiomer) = 35.1 min.

*racemic sample*:

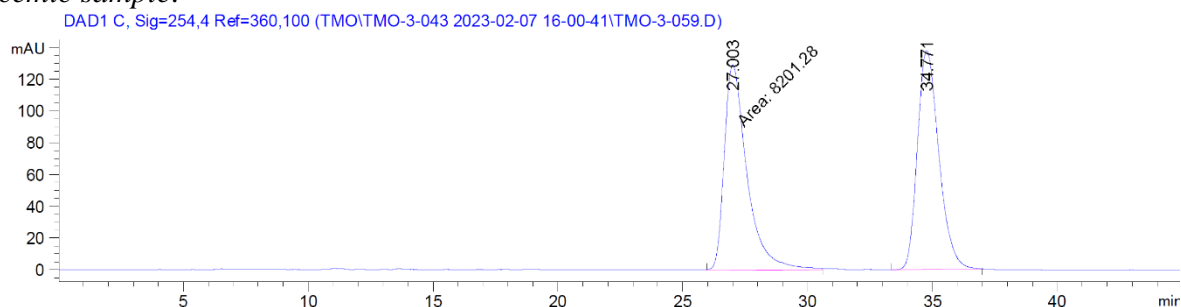

Signal 3: DAD1 C, Sig=254,4 Ref=360,100

| Peak # | RetTime [min] | Type | Width [min] | Area [mAU*s] | Height [mAU] | Area %  |
|--------|---------------|------|-------------|--------------|--------------|---------|
| 1      | 27.003        | MM   | 1.0582      | 8201.28418   | 129.17070    | 49.9062 |
| 2      | 34.771        | BB   | 0.9210      | 8232.10938   | 137.79858    | 50.0938 |

Totals : 1.64334e4 266.96928

enantioselective sample:

DAD1 C, Sig=254,4 Ref=360,100 (TMO\TMO-3-043 2023-02-07 16-00-41\OnlineEdited--002.D)

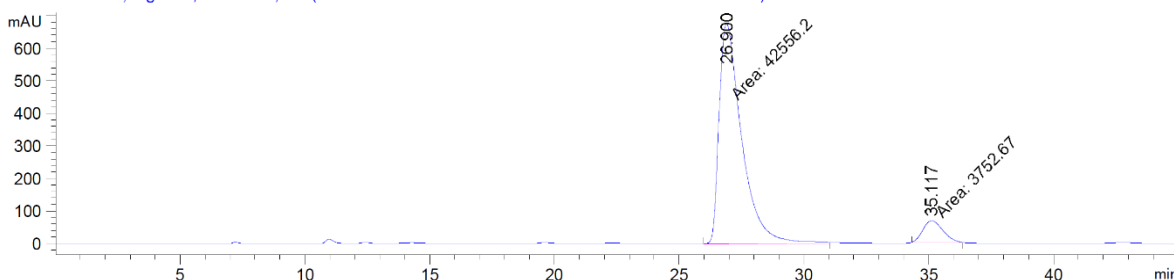

Signal 3: DAD1 C, Sig=254,4 Ref=360,100

| Peak # | RetTime [min] | Type | Width [min] | Area [mAU*s] | Height [mAU] | Area %  |
|--------|---------------|------|-------------|--------------|--------------|---------|
| 1      | 26.900        | MM   | 1.0486      | 4.25562e4    | 676.38562    | 91.8964 |
| 2      | 35.117        | MM   | 0.9312      | 3752.67017   | 67.16611     | 8.1036  |

Totals : 4.63089e4 743.55173

## 5.6 Preparation and Characterization of Asymmetric Aromatic Finkelstein / Carbonylation Sequence Product

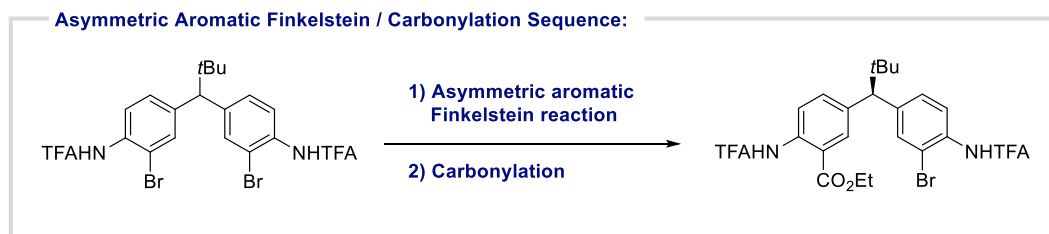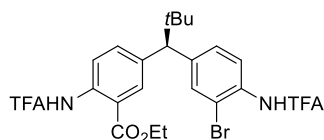

### Ethyl (R)-5-(1-(3-bromo-4-(2,2,2-trifluoroacetamido)phenyl)-2,2-dimethylpropyl)-2,2,2-trifluoroacetate (8)

A 1-dram vial equipped with stir bar and septum cap was charged with **1** (120.8 mg, 0.20 mmol, 1.00 equiv.),  $\text{Cu}(\text{MeCN})_4\text{BF}_4$  (4.4 mg, 14.0  $\mu\text{mol}$ , 0.07 equiv.), **L9** (15.9 mg, 0.03 mmol, 0.15 equiv.),  $\text{K}_3\text{PO}_4$  (169.8 mg, 0.80 mmol, 4.00 equiv.) and  $\text{NaI}$  (36.0 mg, 0.24 mmol, 1.20 equiv.). The vial was evacuated and backfilled with  $\text{N}_2$  (3x) before dry MeCN (0.3 mL, 0.66 M) was added. The reaction mixture was heated at 50 °C for 16 h. After cooling to r.t., the mixture was filtered through a plug of  $\text{SiO}_2$  (eluted with EtOAc), transferred into a scintillation vial and concentrated *in vacuo*.



To the vial containing the crude material was added a stir bar and Pd(OAc)<sub>2</sub> (4.5 mg, 0.02 mmol, 0.10 equiv.). Following evacuation and back-filling with N<sub>2</sub> (3x), dry DMF (2.0 mL, 0.1 M), Et<sub>3</sub>N (0.28 mL, 2.00 mL, 10.0 equiv.) and EtOH (0.25 mL) was added. The mixture was purged with CO (balloon) for 5 min, and the mixture was heated at 90 °C for 16 h under an atmosphere of CO. The reaction mixture was cooled to r.t., filtered through a plug SiO<sub>2</sub> (eluted with EtOAc) and concentrated by air stream evaporation. Purification by automated reverse-phase column chromatography (Biotage, SNAP C-18 Ultra 12 g, gradient MeCN in water (0.1% formic acid buffer), 3 CV: 0-60%, 10 CV: 60-100%, 5 CV: 100%) yielded **8** as white solid (59.8 mg, 0.10 mmol, 50%).

**Synthesis of racemic 8:** Prepared according to the procedure for enantioenriched **8**, using TMG-Gly-OLi as ligand for the aromatic Finkelstein reaction.

**R<sub>F</sub>:** 0.55 (hexanes/EtOAc 8:2)

**<sup>1</sup>H NMR** (400 MHz, CDCl<sub>3</sub>) δ 12.23 (s, 1H), 8.60 (d, *J* = 8.7 Hz, 1H), 8.39 (s, 1H), 8.24 (d, *J* = 8.5 Hz, 1H), 8.09 (d, *J* = 2.3 Hz, 1H), 7.67 (dd, *J* = 8.7, 2.3 Hz, 1H), 7.62 (d, *J* = 2.1 Hz, 1H), 7.45 (dd, *J* = 8.6, 2.1 Hz, 1H), 4.44 (q, *J* = 7.1 Hz, 2H), 3.73 (s, 1H), 1.46 (t, *J* = 7.1 Hz, 3H), 1.03 (s, 9H).

**<sup>13</sup>C NMR** (101 MHz, CDCl<sub>3</sub>) δ 168.1, 155.3 (q, *J* = 37.4 Hz), 154.8 (q, *J* = 37.8 Hz), 141.9, 138.7, 137.5, 135.7, 133.7, 132.2, 131.7, 129.9, 121.7, 120.7, 116.4, 115.8 (q, *J* = 288.6 Hz), 115.7 (q, *J* = 288.5 Hz), 113.9, 62.8, 62.4, 35.5, 29.1, 14.3.

**<sup>19</sup>F NMR** (376 MHz, CDCl<sub>3</sub>) δ -75.87, -76.24.

**HRMS** (ESI/Q-TOF): Exact mass calculated for [C<sub>23</sub>H<sub>21</sub>BrF<sub>6</sub>N<sub>2</sub>O<sub>4</sub> - H]<sup>-</sup>; requires *m/z* = 595.0673, found *m/z* = 595.0682.

**IR** (FT-ATR, cm<sup>-1</sup>, thin film) *v*<sub>max</sub> = 3389(w), 2967(bw), 2874(w), 1734(s), 1695(m), 1603(m), 1530(s), 1371(m), 1289(s), 1266(s), 1192(bs), 1159(bs), 1086(m), 1018(w), 903(w), 838(w), 734(m), 600(w).

**Optical:** [α]<sub>D</sub><sup>20</sup> = +9.8° (*er* = 93:7, *c* = 1.0, CHCl<sub>3</sub>).

**HPLC** (Chiralpak AD-H column, 5% *i*-PrOH in hexanes, 0.5 ml/min, 254 nm): *t<sub>R</sub>* (major enantiomer) = 9.5 min, *t<sub>R</sub>* (minor enantiomer) = 11.5 min.

*racemic sample:*

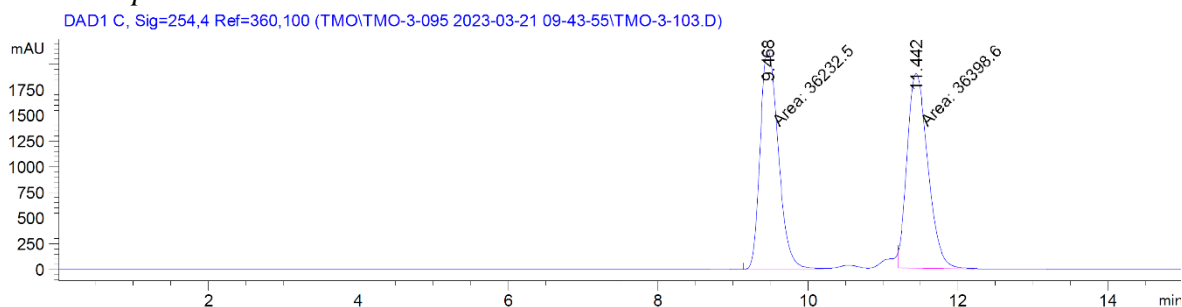

Signal 3: DAD1 C, Sig=254,4 Ref=360,100

| Peak # | RetTime [min] | Type | Width [min] | Area [mAU*s] | Height [mAU] | Area %  |
|--------|---------------|------|-------------|--------------|--------------|---------|
| 1      | 9.468         | MM   | 0.2825      | 3.62325e4    | 2137.33325   | 49.8857 |
| 2      | 11.442        | MM   | 0.3197      | 3.63986e4    | 1897.69580   | 50.1143 |

Totals : 7.26311e4 4035.02905

*enantioselective sample:*

DAD1 C, Sig=254,4 Ref=360,100 (TMO\TMO-3-095 2023-03-21 09-43-55\TMO-3-095.D)

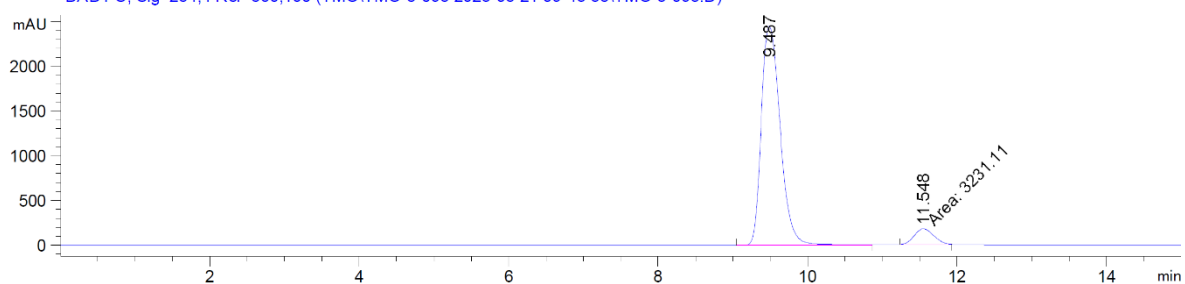

Signal 3: DAD1 C, Sig=254,4 Ref=360,100

| Peak # | RetTime [min] | Type | Width [min] | Area [mAU*s] | Height [mAU] | Area %  |
|--------|---------------|------|-------------|--------------|--------------|---------|
| 1      | 9.487         | VV   | 0.2747      | 4.29832e4    | 2450.28442   | 93.0084 |
| 2      | 11.548        | MM   | 0.3027      | 3231.11060   | 177.87854    | 6.9916  |

Totals : 4.62143e4 2628.16296

## 6. Mechanistic Studies

### 6.1. Reaction Progress Monitoring

Eight 1-dram vials were equipped with a stir bar and septum cap and were charged with **1** (60.4 mg, 0.10 mmol, 1.00 equiv.), Cu(MeCN)<sub>4</sub>BF<sub>4</sub> (3.1 mg, 10.0 μmol, 0.01 equiv.), **L9** (8.0 mg, 0.015 mmol, 0.15 equiv.), K<sub>3</sub>PO<sub>4</sub> (84.9 mg, 0.40 mmol, 4.00 equiv.) and NaI (18.0 mg, 0.12 mmol, 1.20 equiv.). The vials were evacuated and backfilled with N<sub>2</sub> (3x) before dry MeCN (0.2 mL, 0.5 M) was added. The reaction mixtures were heated at 50 °C for 0, 2, 4, 7, 10, 11.5, 13, 16 h. After cooling to r.t., each mixture was filtered through a plug of SiO<sub>2</sub> (eluted with EtOAc), concentrated and analyzed by <sup>1</sup>H NMR and chiral HPLC. NMR yield (δ = 3.64 ppm) was determined against CH<sub>2</sub>Br<sub>2</sub> as internal standard and the enantiomeric ratio could be determined by chiral HPLC comparing against authentic samples of **1** and **3**.

**Table S7:** Reaction progress monitoring.

| Time [h] | Molar Fraction [%] |          |          | <i>er</i> |    | <i>ee</i> |
|----------|--------------------|----------|----------|-----------|----|-----------|
|          | <b>1</b>           | <b>2</b> | <b>3</b> |           |    |           |
| 0        | 100                | 0        | 0        |           |    |           |
| 2        | 100                | 0        | 0        |           |    |           |
| 4        | 100                | 0        | 0        |           |    |           |
| 7        | 97                 | 5        | 0        | 12        | 88 | 76        |
| 10       | 83                 | 21       | 0        | 10        | 90 | 80        |
| 11.5     | 27                 | 57       | 14       | 8         | 92 | 84        |
| 13       | 24                 | 63       | 13       | 6         | 94 | 88        |
| 16       | 22                 | 61       | 12       | 5         | 95 | 90        |

### 6.2. Origin of Induction Period

*Pre-stirring Substrate and Base:* Two 1-dram vials were equipped with a stir bar and septum cap and were charged with **1** (60.4 mg, 0.10 mmol, 1.00 equiv.) and K<sub>3</sub>PO<sub>4</sub> (84.9 mg, 0.40 mmol, 4.00 equiv.). The vials were evacuated and backfilled with N<sub>2</sub> (3x) before dry MeCN (0.2 mL, 0.5 M) was added. The reaction mixtures were heated at 50 °C for 6 h. After cooling to r.t., Cu(MeCN)<sub>4</sub>BF<sub>4</sub> (3.1 mg, 10.0 μmol, 0.01 equiv.), **L9** (8.0 mg, 0.015 mmol, 0.15 equiv.), and NaI (18.0 mg, 0.12 mmol, 1.20 equiv.) were added before heating at 50 °C was continued for 30 min and 60 min, respectively. Each mixture was filtered through a plug of SiO<sub>2</sub> (eluted with EtOAc), concentrated and analyzed by <sup>1</sup>H NMR. NMR yield (δ = 3.64 ppm) was determined against CH<sub>2</sub>Br<sub>2</sub> as internal standard.

**Table S8:** Identifying the origin of the induction period.

| Time [min] | Molar Fraction [%] |          |          | <i>assumed</i> |
|------------|--------------------|----------|----------|----------------|
|            | <b>1</b>           | <b>2</b> | <b>3</b> |                |
| 0          | 100                | 0        | 0        |                |
| 30         | 88                 | 13       | 0        |                |
| 60         | 46                 | 48       | 6        |                |

*Pre-stirring Catalyst:* Two 1-dram vials were equipped with a stir bar and septum cap and were charged with  $\text{Cu}(\text{MeCN})_4\text{BF}_4$  (3.1 mg, 10.0  $\mu\text{mol}$ , 0.01 equiv.), **L9** (8.0 mg, 0.015 mmol, 0.15 equiv.), NaI (18.0 mg, 0.12 mmol, 1.20 equiv.) and  $\text{K}_3\text{PO}_4$  (84.9 mg, 0.40 mmol, 4.00 equiv.). The vials were evacuated and backfilled with  $\text{N}_2$  (3x) before dry MeCN (0.2 mL, 0.5 M) was added. The reaction mixtures were heated at 50 °C for 6 h. After cooling to r.t., **1** (60.4 mg, 0.10 mmol, 1.00 equiv.) was added before heating at 50 °C was continued for 30 min and 60 min, respectively. Each mixture was filtered through a plug of  $\text{SiO}_2$  (eluted with EtOAc), concentrated and analyzed by  $^1\text{H}$  NMR. NMR yield ( $\delta = 3.64$  ppm) was determined against  $\text{CH}_2\text{Br}_2$  as internal standard.

**Table S9:** Identifying the origin of the induction period.

| Time [min] | Molar Fraction [%] |   |   |                |
|------------|--------------------|---|---|----------------|
|            | 1                  | 2 | 3 |                |
| 0          | 100                | 0 | 0 | <i>assumed</i> |
| 30         | 92                 | 6 | 0 |                |
| 60         | 96                 | 6 | 0 |                |

### 6.3. Correlation of $^{13}\text{C}$ NMR Shift with Enantioselectivity

**Table S10:** NMR correlation of central methine carbon.

| Compound  | Substituent | <i>er</i> | <i>ee</i> [%] | $\ln(er)$ | $^{13}\text{C}$ NMR shift [ppm] | $V_{\text{Bur}} (r = 3.0 \text{ \AA})$ LEC [%] |      |
|-----------|-------------|-----------|---------------|-----------|---------------------------------|------------------------------------------------|------|
| <b>15</b> | Me          | 55        | 45            | 10        | 0.2006707                       | 43.5                                           | 60.7 |
| <b>14</b> | <i>i</i> Pr | 82        | 18            | 64        | 1.51634749                      | 59.2                                           | 85.7 |
| <b>13</b> | Cy          | 84        | 16            | 68        | 1.65822808                      | 58                                             | 90.5 |
| <b>12</b> | CyMe        | 94        | 6             | 88        | 2.75153531                      | 62.7                                           | 96.6 |
| <b>11</b> | Ad          | 92        | 8             | 84        | 2.44234704                      | 64.7                                           | 94.1 |
| <b>4</b>  | <i>t</i> Bu | 94        | 6             | 88        | 2.75153531                      | 62.8                                           | 94.2 |

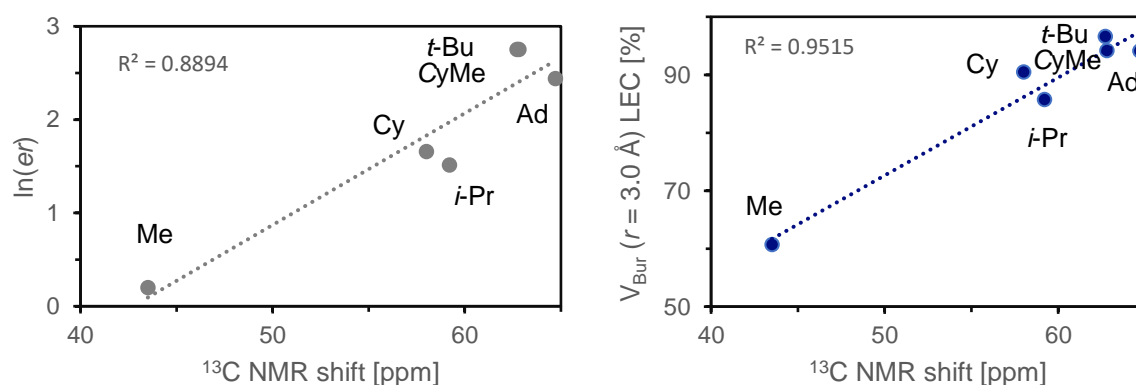

**Figure S2:** Correlation between  $^{13}\text{C}$  NMR shift of central methylene carbon and enantioselectivity/computed  $V_{\text{Bur}}$ .

## 7. Computational Details

### Conformational Search and DFT Geometry Optimization:

Molecular mechanics conformational search employing Schrödinger MacroModel and the OPLS4 force field was performed for each diarylmethine.<sup>6,7</sup> The conformational searches were performed in gas phase with a maximum of 10,000 interactions and convergence threshold of 0.001 au. The conformer window was restricted to 5.02 kcal/mol of the lowest energy conformer, excluding mirror-image conformers. Density Functional Theory (DFT) geometry optimizations for all conformers were then performed at the  $\omega$ B97X-D/def2-SVP level employing Gaussian16 version C.01.<sup>8</sup> Frequency calculations confirmed the minima nature of each conformer. Energies and molecular features were computed at the  $\omega$ B97X-D/def2-TZVP level. Natural bond orbital analysis was performed using NBO 7.0.<sup>9</sup>

### Featurization and Molecular Descriptors Collection:

Global and atom-specific (Figure S3) molecular descriptors were collected from Gaussian output files or computed with the Morfeus python package<sup>10</sup> and the DBSTEP python package.<sup>11</sup> For each molecular descriptor, the minimum, maximum, and Boltzmann-weighted average values of the descriptor as well as the descriptor value for lowest energy conformer in the conformational ensemble were collected. Boltzmann-weighted properties were calculated using the Gibbs corrected energies computed using GoodVibes.<sup>12</sup> A complete list of these descriptors is available as supporting information as “Computed\_Properties.xlsx.”

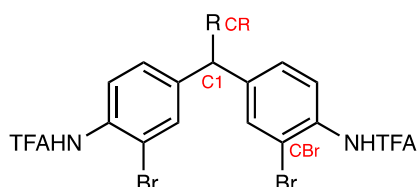

**Figure S3:** Atom numbering used to collect atom-specific descriptors.

#### Global descriptors:

- HOMO and LUMO energies
- dipole moment
- molar volume.

#### Atom-specific descriptors:

- Natural Population Analysis charges for C1, CR, and CBr. {keyword: POP=NBO7}
- NMR shielding for C1, CR, and CBr. {keyword: NMR }
- $V_{\text{Bur}}$  for C1 and CR calculated from 2 to 5 Å at 0.5 Å steps, computed with Morfeus.
- Sterimol Bmin and Bmax values (C1 to CR) from 0 to 3 Å at 0.5 Å steps, computed with DBSTEP.

## Linear Regression:

Univariate linear regressions were generated to search for correlations between the computed molecular descriptors and the measured enantioselectivities. The linear models were trained on compounds **4**, **11**, **13**, **14**, and **15** and tested to predict the enantioselectivity of compound **12**. We identified the two best fit univariate linear models which show correlation between the measure enantioselectivities with variations of the computed buried volume ( $V_{\text{Bur}}$ ) at the substituent carbon. Each model has an  $R^2$  value of 0.89 and error in the predicted  $\Delta\Delta G^\ddagger$  for **12** lower than 0.03 kcal/mol, Table S11. Since both models exhibit similar metric, we focused the discussion centered on the  $V_{\text{Bur}}$  ( $r = 3.0 \text{ \AA}$ ) computed for the lowest energy conformer (LEC) in the manuscript, Table S12. The advantage of using this descriptor lies in its reliance on the calculation of  $V_{\text{Bur}}$  for only one conformer, as opposed to minimum value  $V_{\text{Bur}}$ , which require calculations for multiple conformers. Given previous studies,<sup>13</sup> we also evaluated the correlation between observed enantioselectivity and Charton values (Figure S4A). Notably, this led to similar overall statistics ( $R^2 = 0.90$ ) but is limited to substituents for which the Charton value has been empirically determined. Charton values are modestly correlated, but not perfectly co-linear with the  $V_{\text{Bur}}$  parameter employed in our model, Figure S4B.

**Table S11:** Linear regression models.

| Molecular Descriptor                                 | Equation              | $R^2$ | $Q^2$ | Predicted $\Delta\Delta G^\ddagger$<br>12 [kcal/mol] | Error $\Delta\Delta G^\ddagger$<br>12 [kcal/mol] |
|------------------------------------------------------|-----------------------|-------|-------|------------------------------------------------------|--------------------------------------------------|
| $V_{\text{Bur}}$ ( $R = 2.5 \text{ \AA}$ ) min value | $y = 0.07 * x - 5.01$ | 0.89  | 0.91  | 1.54 [e.r. 92:8]                                     | -0.022                                           |
| $V_{\text{Bur}}$ ( $R = 3.0 \text{ \AA}$ ) LEC       | $y = 0.04 * x - 2.53$ | 0.89  | 0.89  | 1.59 [e.r. 92:8]                                     | +0.025                                           |

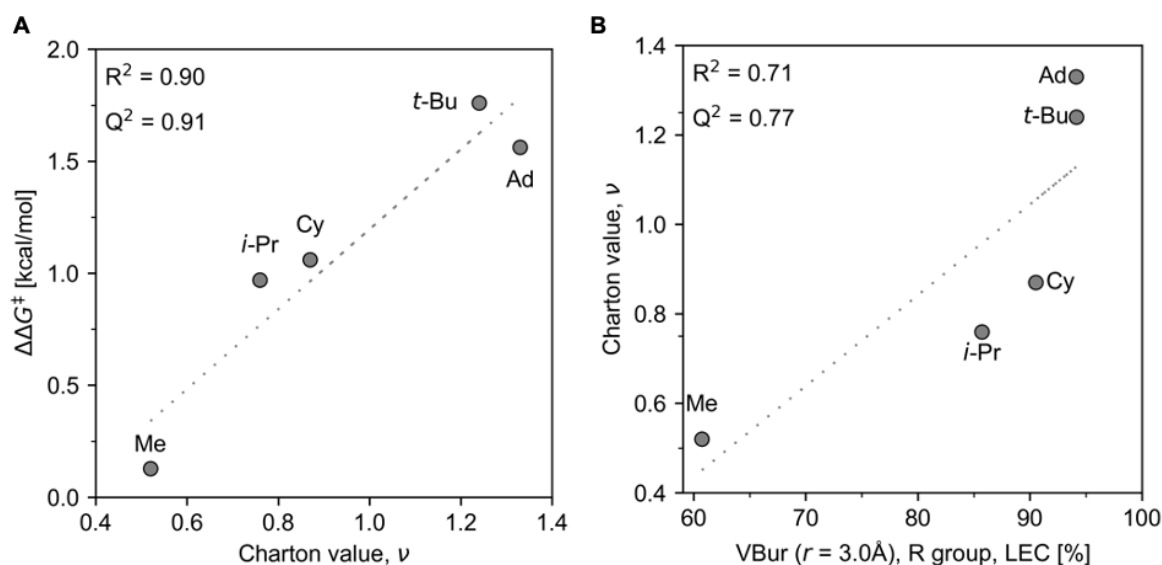

**Figure S4:** Correlation between empirically derived Charton values and computed  $V_{\text{Bur}}$ .

### Computed buried volume and plane angle for each diarylmethine:

**Table S12:** Gibbs corrected energy range within the conformational ensemble, computed buried volume for the lowest energy conformer (LEC), and plane angle for the LEC, Boltzmann averaged, and the range within the conformational ensemble of each diarylmethine.

| Name      | Energy range<br>(kcal/mol) | V <sub>Bur</sub> ( <i>r</i> = 3.0 Å)<br>LEC [%] | Plane Angle<br>LEC [°] | Plane Angle<br>Boltzmann [°] | Plane Angle<br>Range [°] |
|-----------|----------------------------|-------------------------------------------------|------------------------|------------------------------|--------------------------|
| <b>4</b>  | 0.72                       | 94.2                                            | 57.9                   | 59.7                         | 3.4                      |
| <b>11</b> | 0.52                       | 94.1                                            | 72.8                   | 72.5                         | 1.1                      |
| <b>13</b> | 2.61                       | 90.5                                            | 74.3                   | 74.6                         | 2.5                      |
| <b>14</b> | 2.13                       | 85.7                                            | 75.5                   | 75.0                         | 3.2                      |
| <b>12</b> | 0.84                       | 96.6                                            | 67.9                   | 68.1                         | 1.6                      |
| <b>15</b> | 1.53                       | 60.7                                            | 87.8                   | 87.4                         | 1.9                      |

## 8. X-Ray Crystallography

### Experimental

Low-temperature diffraction data ( $\omega$ -scans) were collected on a Rigaku Synergy-S diffractometer coupled to a HyPix-Arc 100 detector with Cu K $\alpha$  ( $\lambda = 1.54178 \text{ \AA}$ ) for the structure of syn-23123. The diffraction images were processed and scaled using Rigaku Oxford Diffraction software (CrysAlisPro; Rigaku OD: The Woodlands, TX, 2015). The structure was solved with SHELXT and was refined against  $F^2$  on all data by full-matrix least squares with SHELXL.<sup>14</sup> All non-hydrogen atoms were refined anisotropically. Hydrogen atoms were included in the model at geometrically calculated positions and refined using a riding model. The isotropic displacement parameters of all hydrogen atoms were fixed to 1.2 times the U value of the atoms to which they are linked (1.5 times for methyl groups). This data was refined as a 2-component inversion twin.

The fractional volume contribution of the minor twin component was freely refined to a converged value of 0.184(5). After accounting for the inversion twin, the major volume of the crystal produced a model with the S enantiomer and a Hooft parameter of 0.0176(11), calculated by the program OLEX2.<sup>15</sup> A centrosymmetric solution of  $P2_1/c$  was investigated. There is a 100% fit of the data to a  $c$ -glide which would imply a racemic mixture within the crystal. However, the  $c$ -glide is a pseudosymmetry element in this case. The glide plane would require the I and Br to occupy the same space. The  $P2_1/c$  model was tested and the distributions of I and Br did indeed converge near 50/50. However, the refinement metrics of  $P2_1/c$  are much worse than  $P2_1$ , implying the polar space group is correct. The I and Br atoms are not related by crystallographic symmetry. The inversion twin does suggest a small amount of the crystal could contain the R enantiomer, but not at a racemic population. This is corroborated by the distributions seen in the chiral HPLC separation. The full numbering scheme of compound syn-23123 can be found in the full details of the X-ray structure determination (CIF), which is included as Supporting Information. CCDC number 2286887 (syn-23123) contains the supplementary crystallographic data for this paper. These data can be obtained free of charge from The Cambridge Crystallographic Data Center via [www.ccdc.cam.ac.uk/data\\_request/cif](http://www.ccdc.cam.ac.uk/data_request/cif).



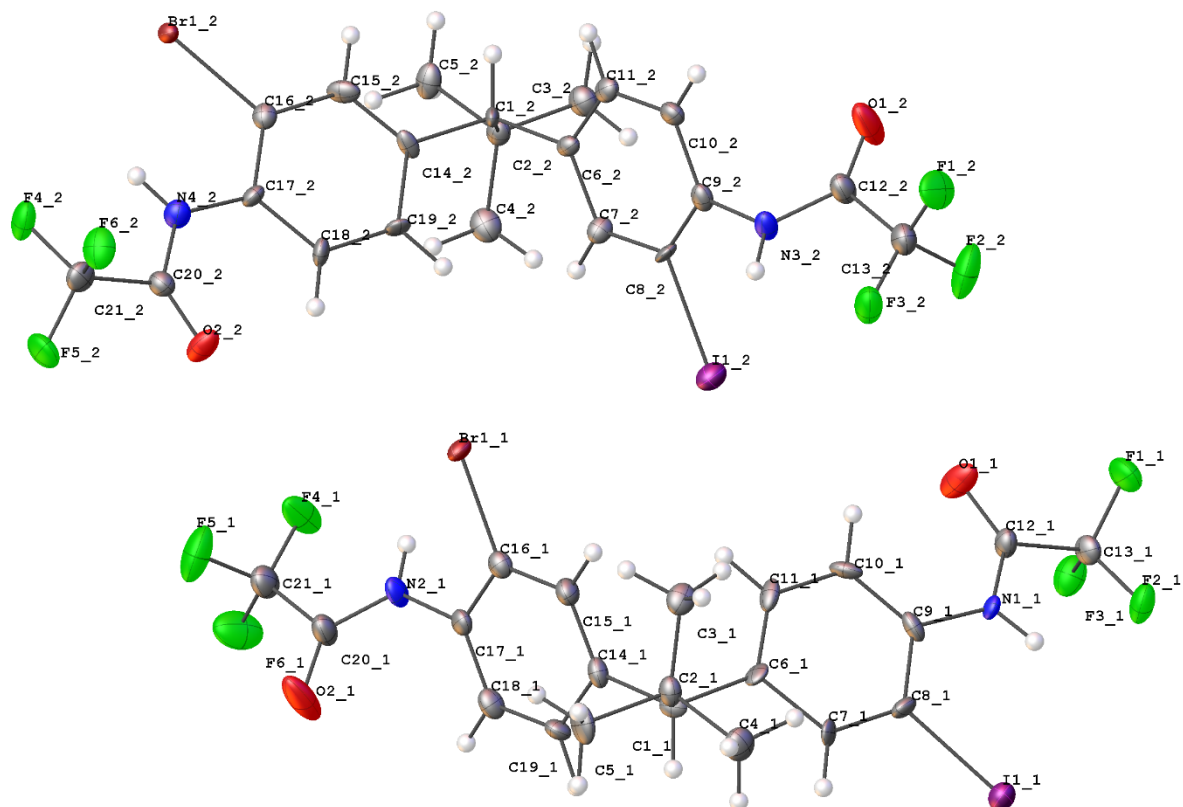

**Figure S5:** The complete numbering scheme of **2** with 50% thermal ellipsoid probability levels. The models have the same numbers for chemically identical atoms that are crystallographically distinct. These two models are distinguished with the suffixes *\_1* and *\_2*. The hydrogen atoms are shown as circles for clarity.

**Table S13: Crystal data and structure refinement for syn-23123.**

|                                   |                                                                                   |                   |
|-----------------------------------|-----------------------------------------------------------------------------------|-------------------|
| Identification code               | syn-23123                                                                         |                   |
| Empirical formula                 | C <sub>21</sub> H <sub>18</sub> Br F <sub>6</sub> I N <sub>2</sub> O <sub>2</sub> |                   |
| Formula weight                    | 651.18                                                                            |                   |
| Temperature                       | 93(2) K                                                                           |                   |
| Wavelength                        | 1.54184 Å                                                                         |                   |
| Crystal system                    | Monoclinic                                                                        |                   |
| Space group                       | P2 <sub>1</sub>                                                                   |                   |
| Unit cell dimensions              | a = 12.38796(9) Å                                                                 | α = 90°.          |
|                                   | b = 14.12473(10) Å                                                                | β = 100.3448(7)°. |
|                                   | c = 13.32450(10) Å                                                                | γ = 90°.          |
| Volume                            | 2293.58(3) Å <sup>3</sup>                                                         |                   |
| Z                                 | 4                                                                                 |                   |
| Density (calculated)              | 1.886 Mg/m <sup>3</sup>                                                           |                   |
| Absorption coefficient            | 13.663 mm <sup>-1</sup>                                                           |                   |
| F(000)                            | 1264                                                                              |                   |
| Crystal size                      | 0.050 x 0.050 x 0.010 mm <sup>3</sup>                                             |                   |
| Crystal color and habit           | Colorless Plate                                                                   |                   |
| Diffractometer                    | XtaLAB Synergy, Dualflex, HyPix-Arc 100                                           |                   |
| Theta range for data collection   | 3.372 to 79.806°.                                                                 |                   |
| Index ranges                      | -15 ≤ h ≤ 15, -17 ≤ k ≤ 17, -16 ≤ l ≤ 16                                          |                   |
| Reflections collected             | 68100                                                                             |                   |
| Independent reflections           | 9705 [R(int) = 0.0566]                                                            |                   |
| Observed reflections (I > 2σ(I))  | 9470                                                                              |                   |
| Completeness to theta = 67.684°   | 100.0 %                                                                           |                   |
| Absorption correction             | Semi-empirical from equivalents                                                   |                   |
| Max. and min. transmission        | 1.00000 and 0.26536                                                               |                   |
| Solution method                   | SHELXT-2014/5 (Sheldrick, 2014)                                                   |                   |
| Refinement method                 | SHELXL-2014/7 (Sheldrick, 2014)                                                   |                   |
| Data / restraints / parameters    | 9705 / 1 / 602                                                                    |                   |
| Goodness-of-fit on F <sup>2</sup> | 1.083                                                                             |                   |
| Final R indices [I > 2σ(I)]       | R1 = 0.0349, wR2 = 0.0909                                                         |                   |
| R indices (all data)              | R1 = 0.0357, wR2 = 0.0916                                                         |                   |
| Absolute structure parameter      | 0.184(5)                                                                          |                   |
| Extinction coefficient            | n/a                                                                               |                   |
| Largest diff. peak and hole       | 1.915 and -0.904 e.Å <sup>-3</sup>                                                |                   |

## 9. NMR Spectra

$^1\text{H}$  NMR (400 MHz,  $\text{CD}_3\text{OD}$ ): L10

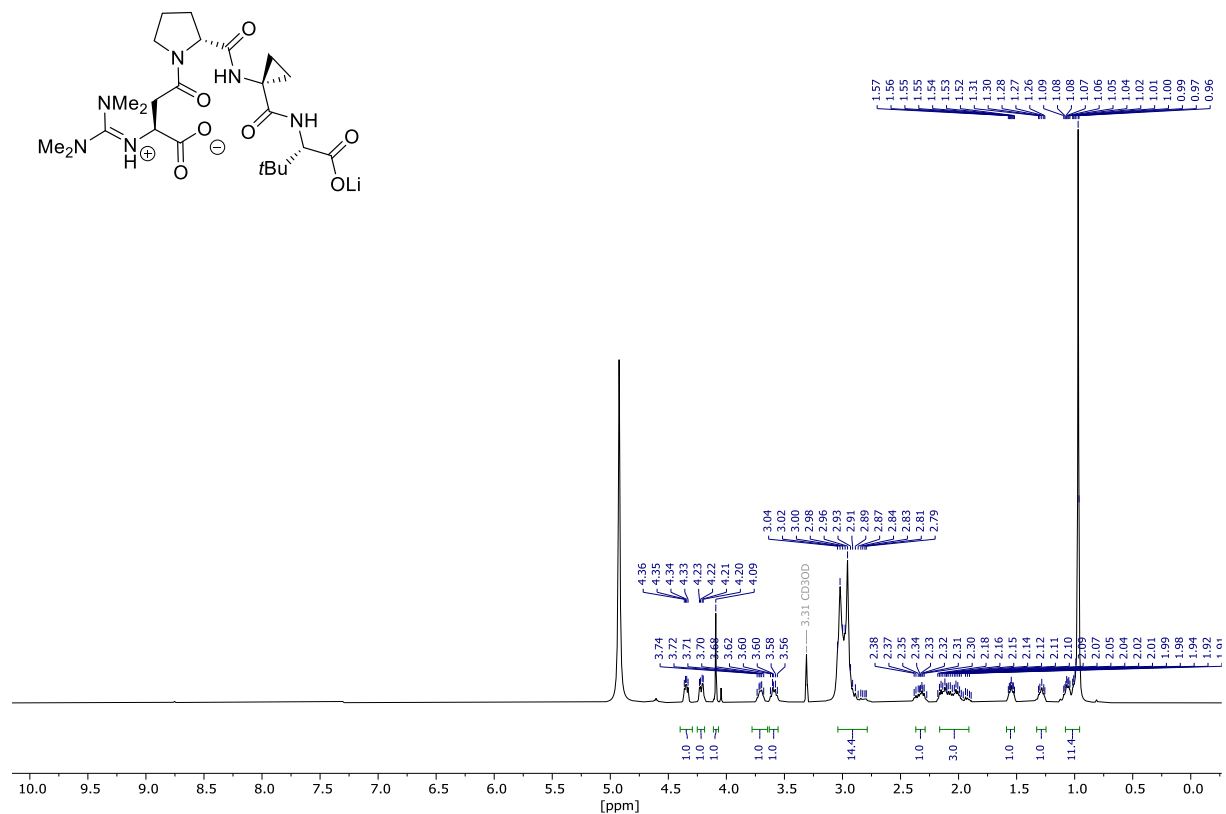

$^{13}\text{C}$  NMR (101 MHz,  $\text{CD}_3\text{OD}$ ): L10

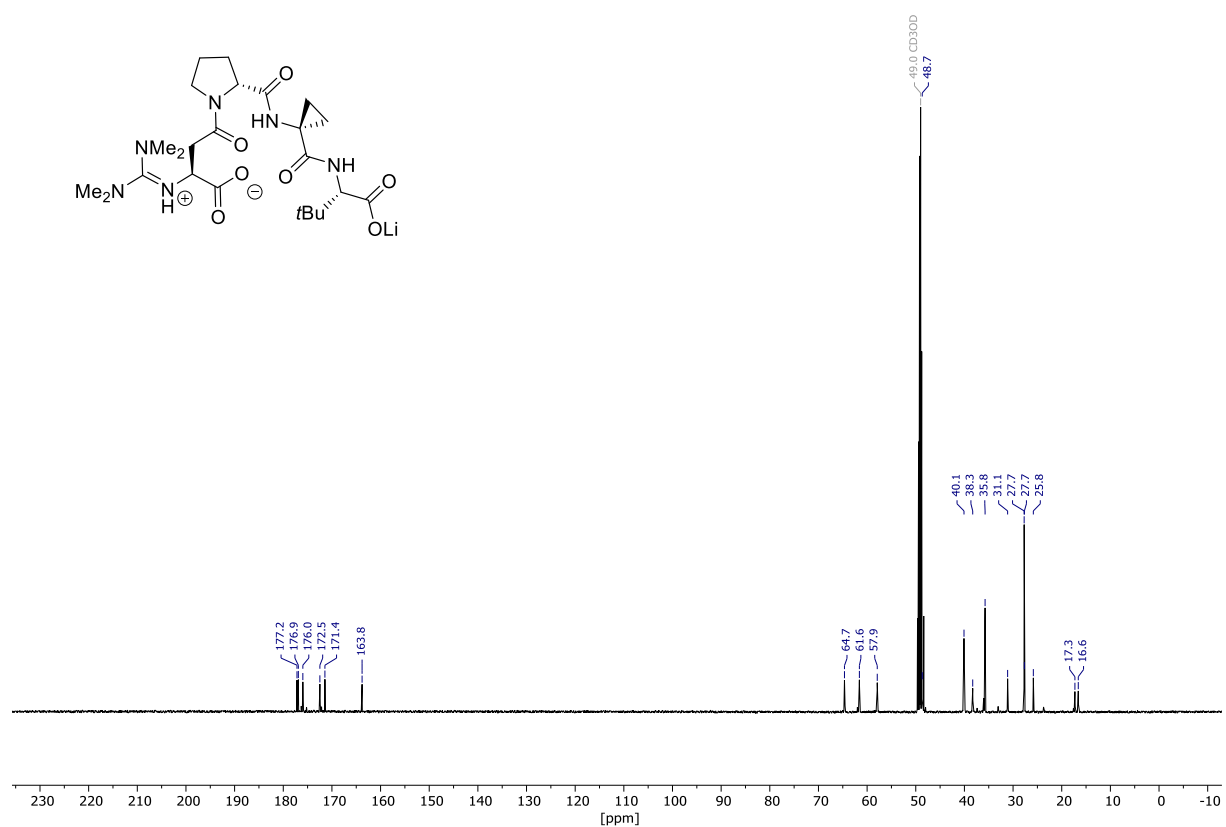

**<sup>1</sup>H NMR (400 MHz, CDCl<sub>3</sub>): S4**

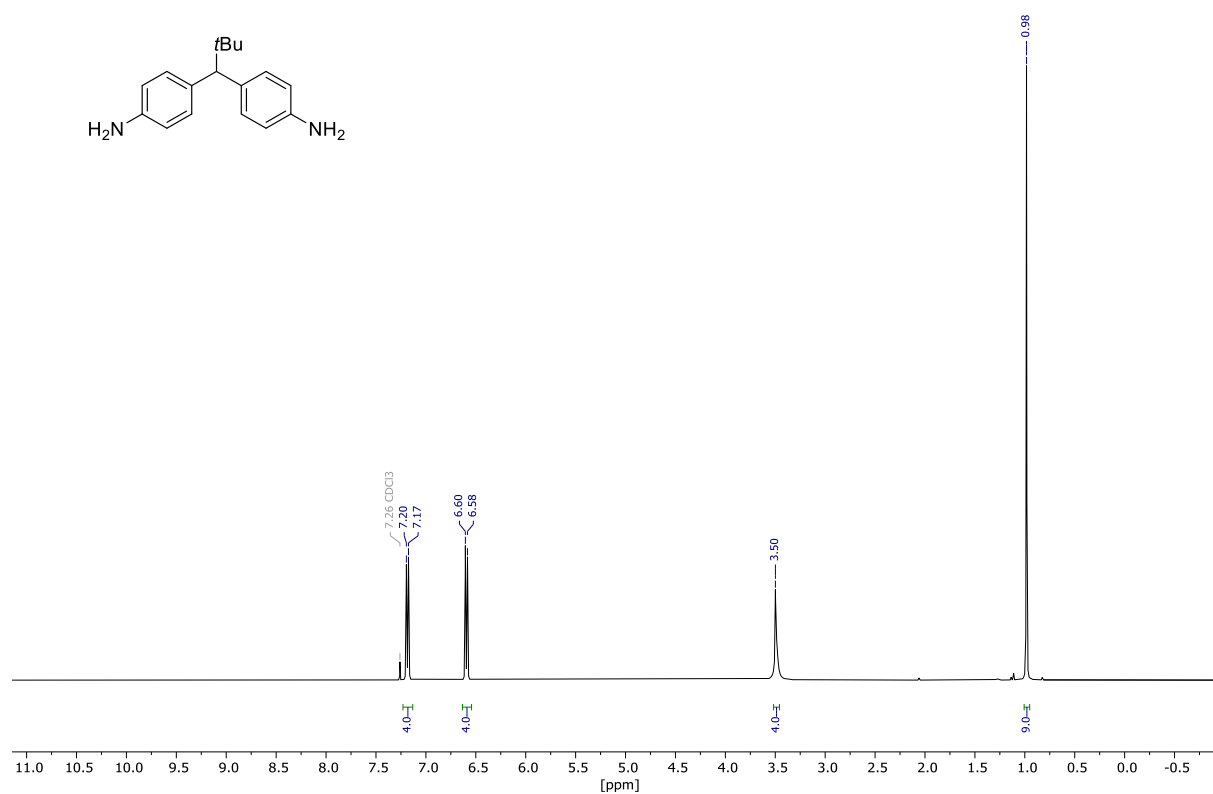

**<sup>1</sup>H NMR (400 MHz, d<sub>6</sub>-DMSO): S5**

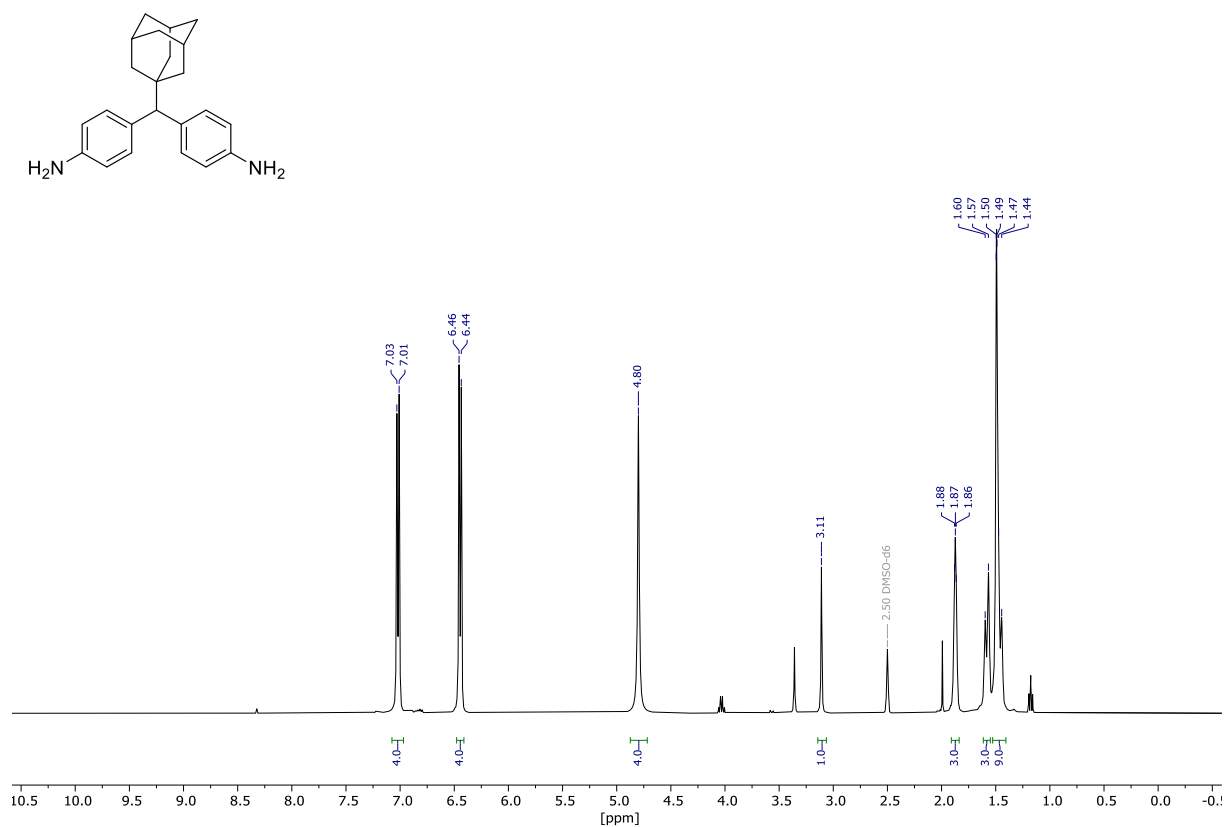

**<sup>13</sup>C NMR (101 MHz, d<sub>6</sub>-DMSO): S5**

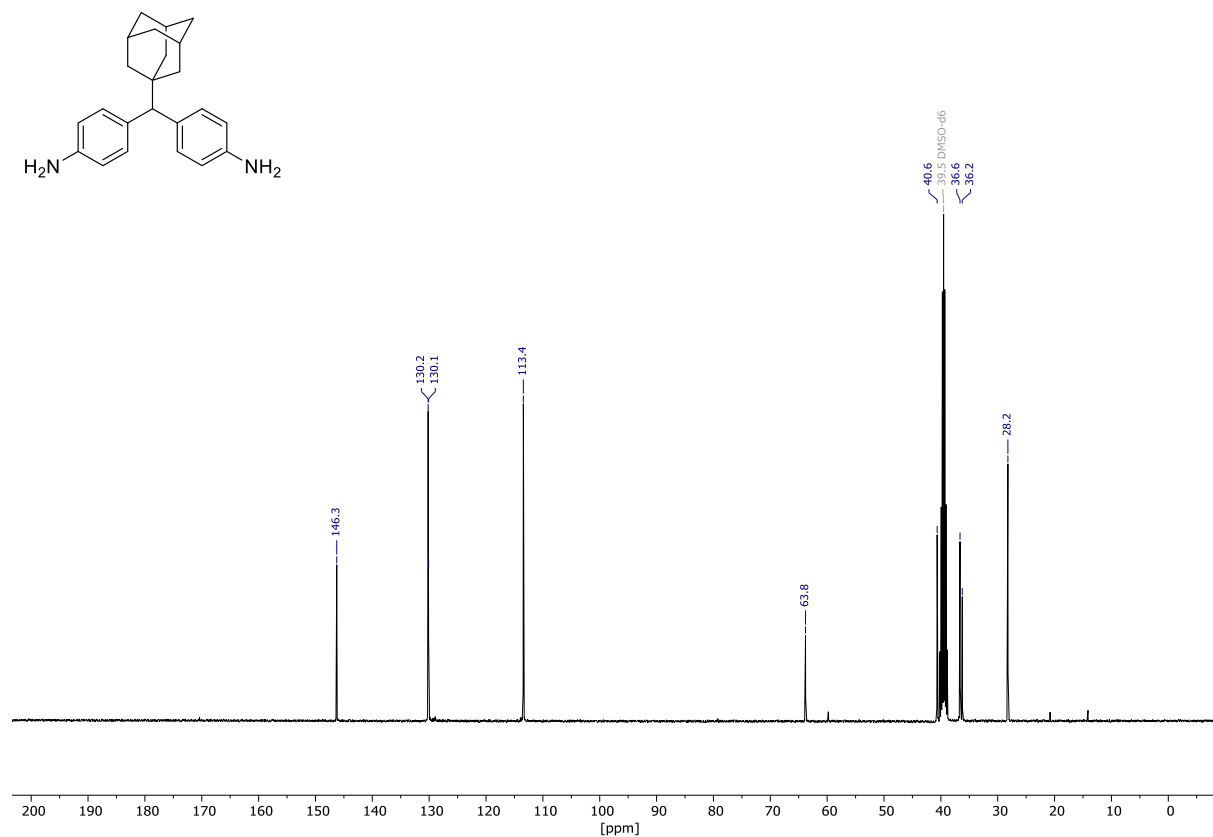

**<sup>1</sup>H NMR (400 MHz, CDCl<sub>3</sub>): S6**

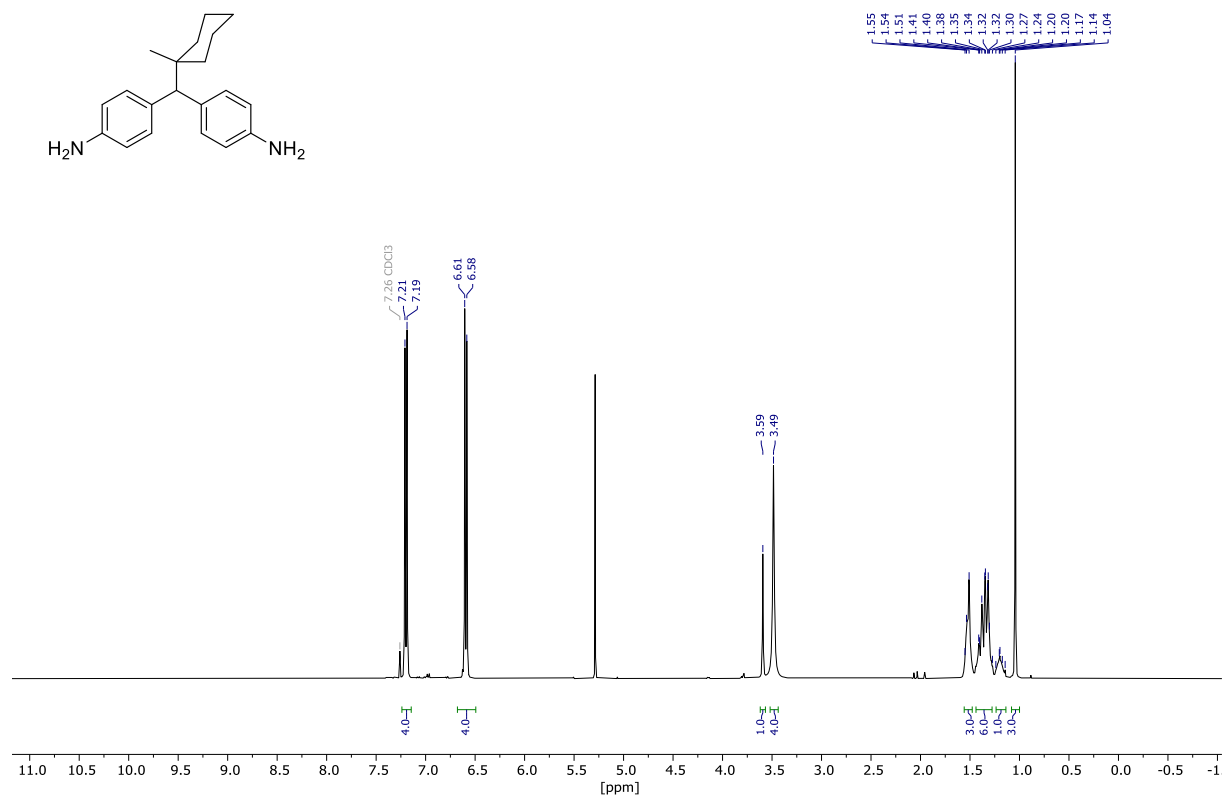

**<sup>13</sup>C NMR (101 MHz, CDCl<sub>3</sub>): S6**

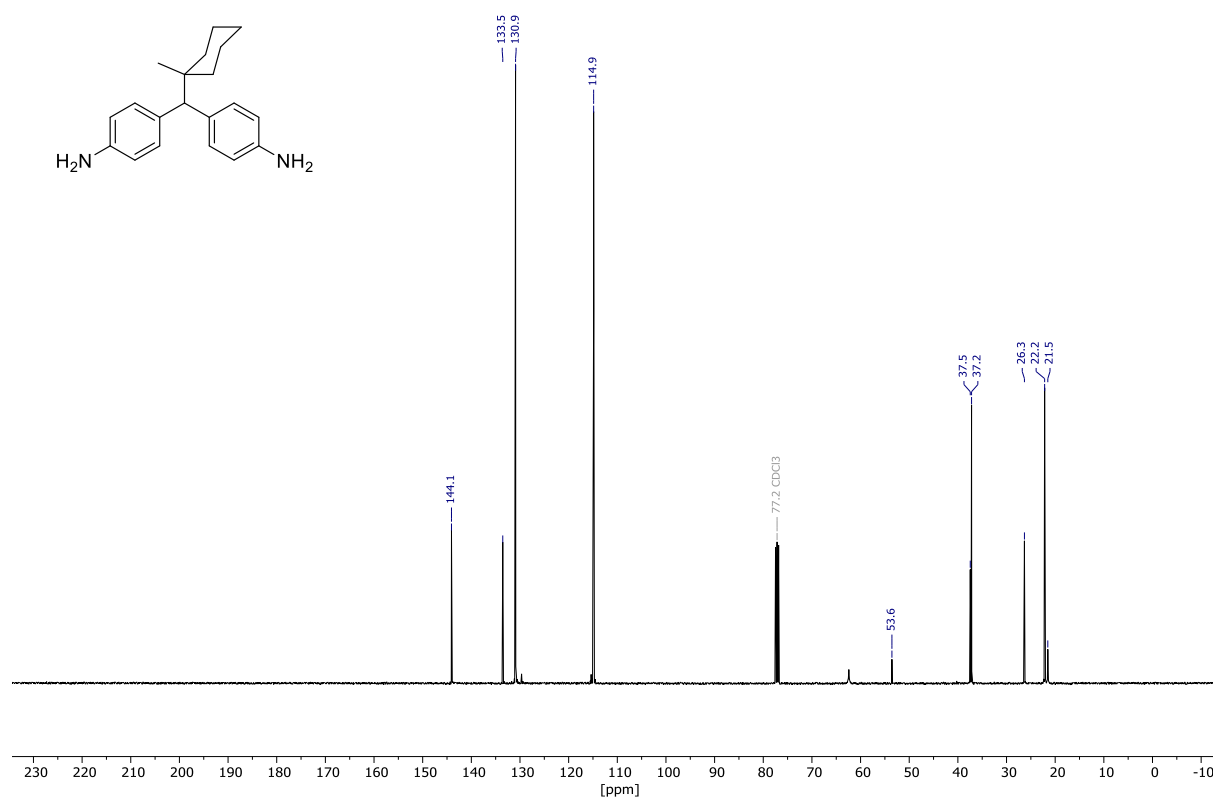

**<sup>1</sup>H NMR (400 MHz, d<sub>6</sub>-DMSO): S7**

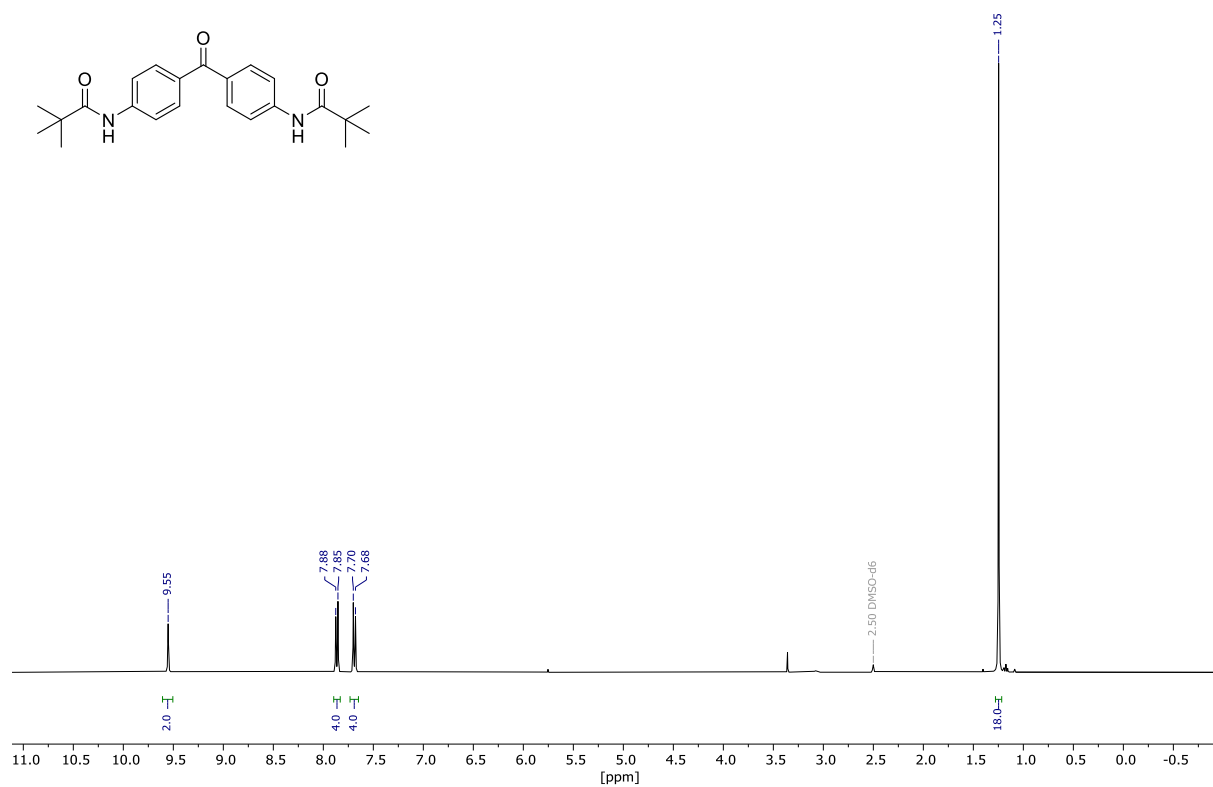

**<sup>13</sup>C NMR (101 MHz, *d*<sub>6</sub>-DMSO): S7**

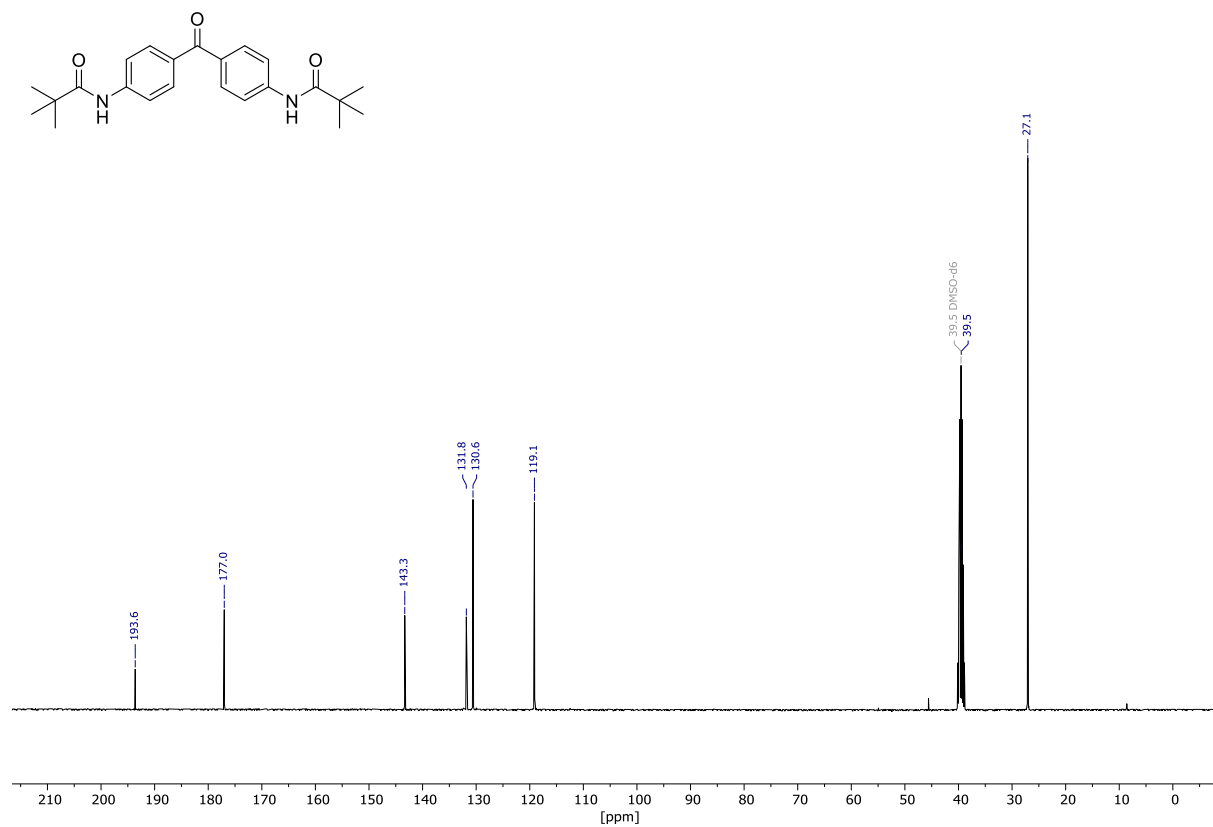

**<sup>1</sup>H NMR (400 MHz, *d*<sub>6</sub>-DMSO): S8**

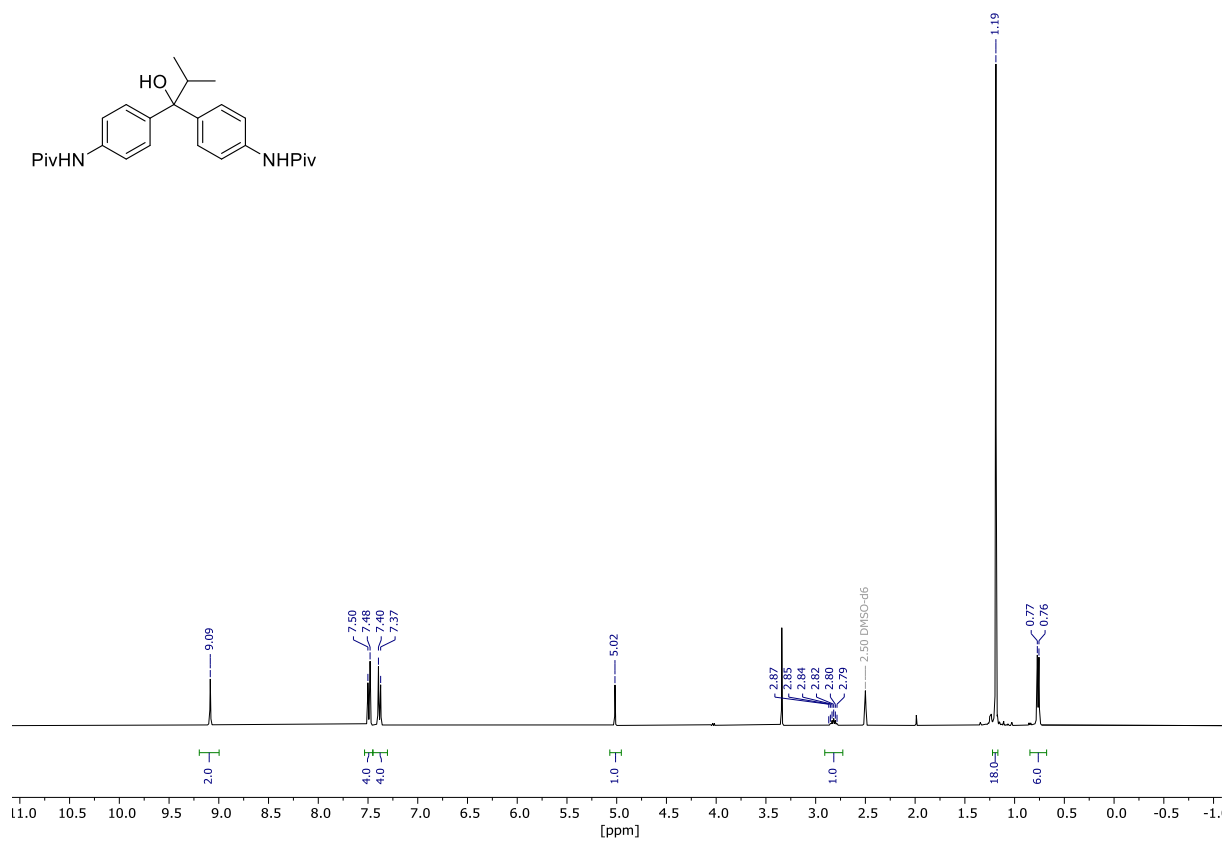

**$^{13}\text{C}$  NMR (101 MHz,  $d_6$ -DMSO): S8**

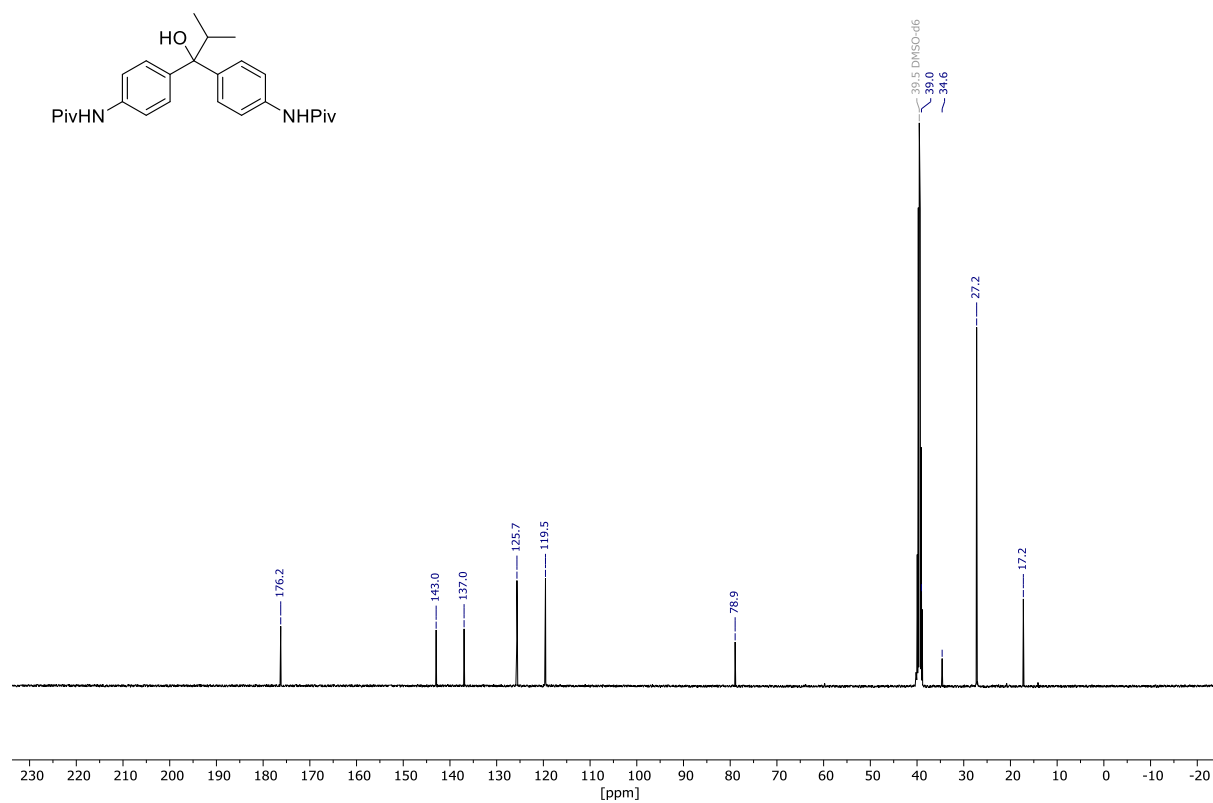

**$^1\text{H}$  NMR (400 MHz,  $\text{CDCl}_3$ ): S9**

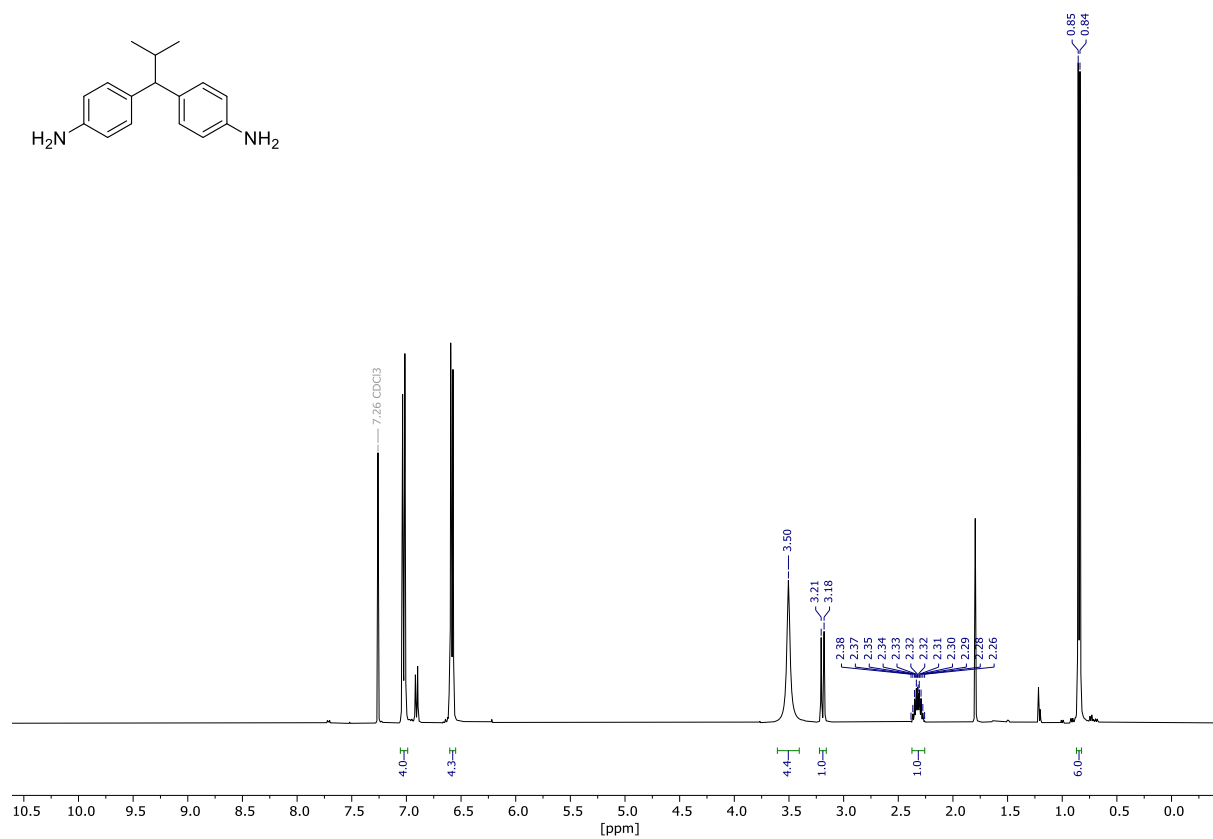



**<sup>1</sup>H NMR (400 MHz, CDCl<sub>3</sub>): 10**

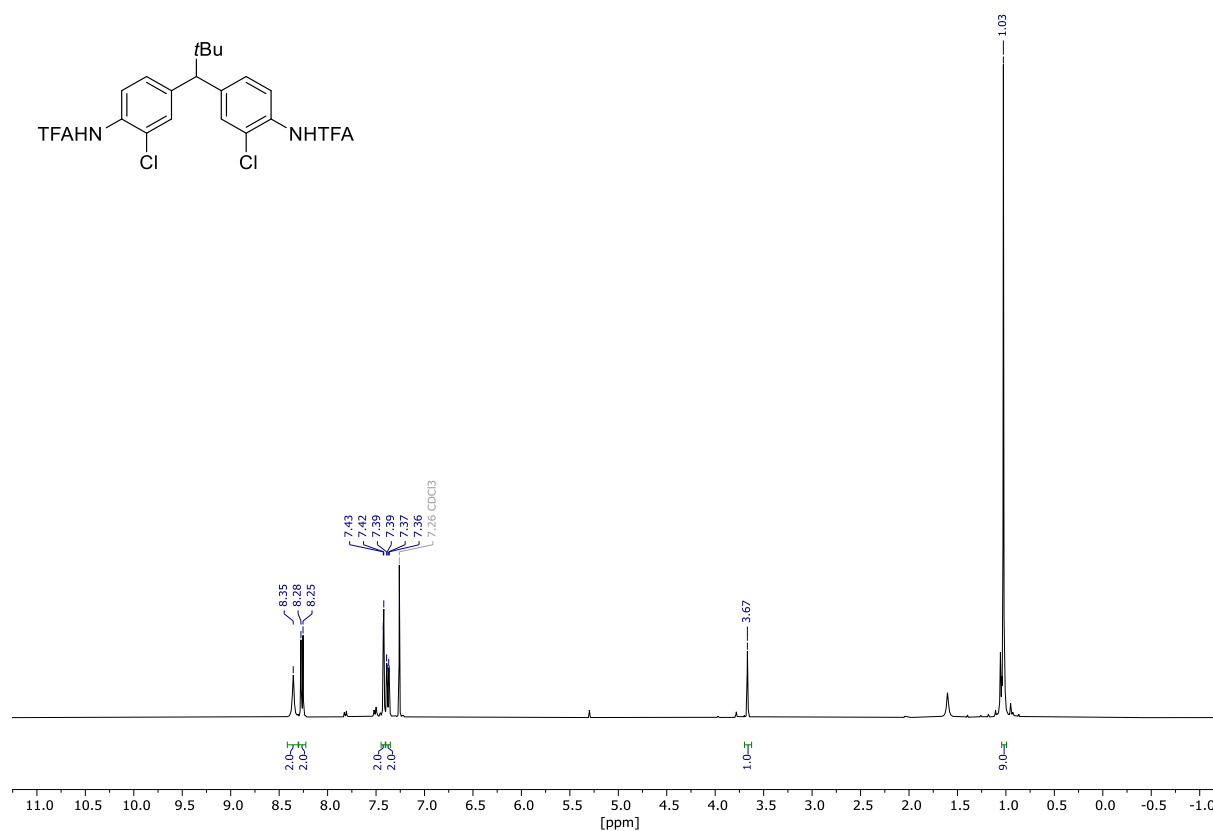

**<sup>13</sup>C NMR (101 MHz, CDCl<sub>3</sub>): 10**

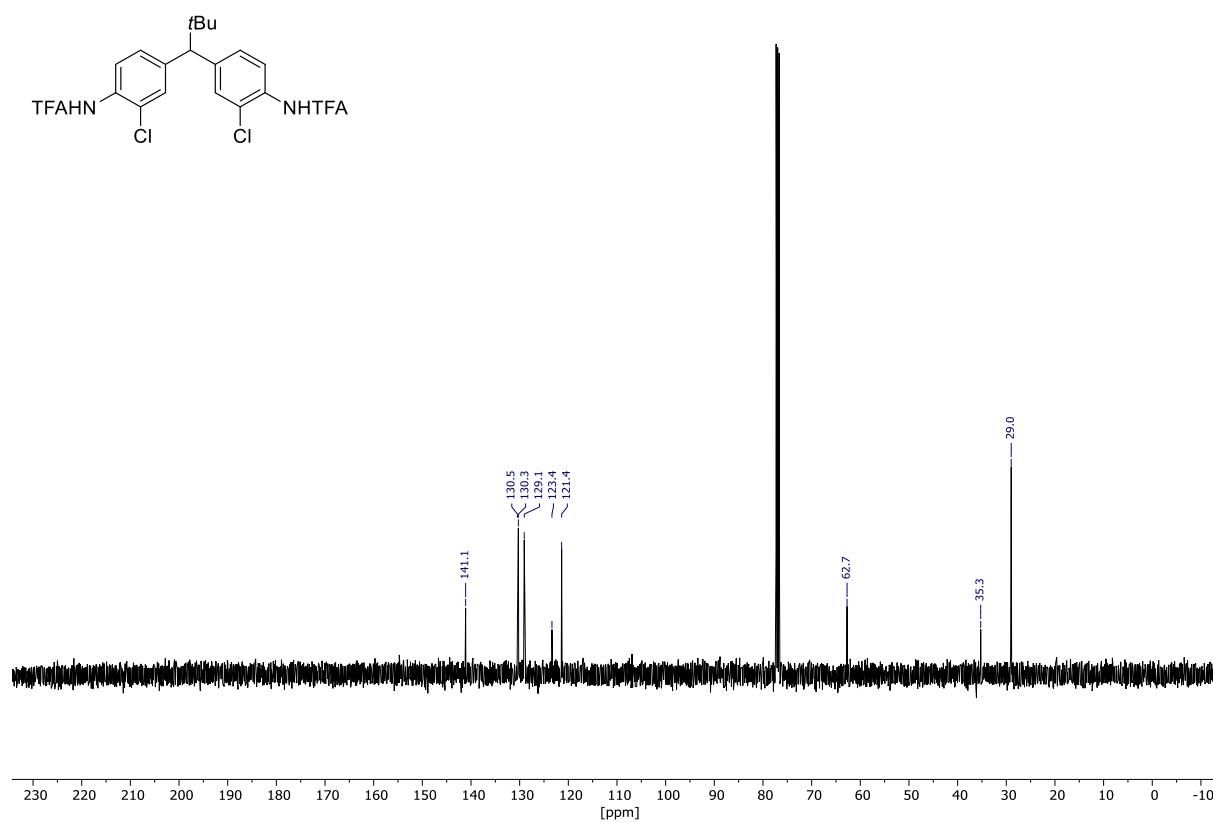

**$^{19}\text{F}$  NMR (376 MHz,  $\text{CDCl}_3$ ): 10**

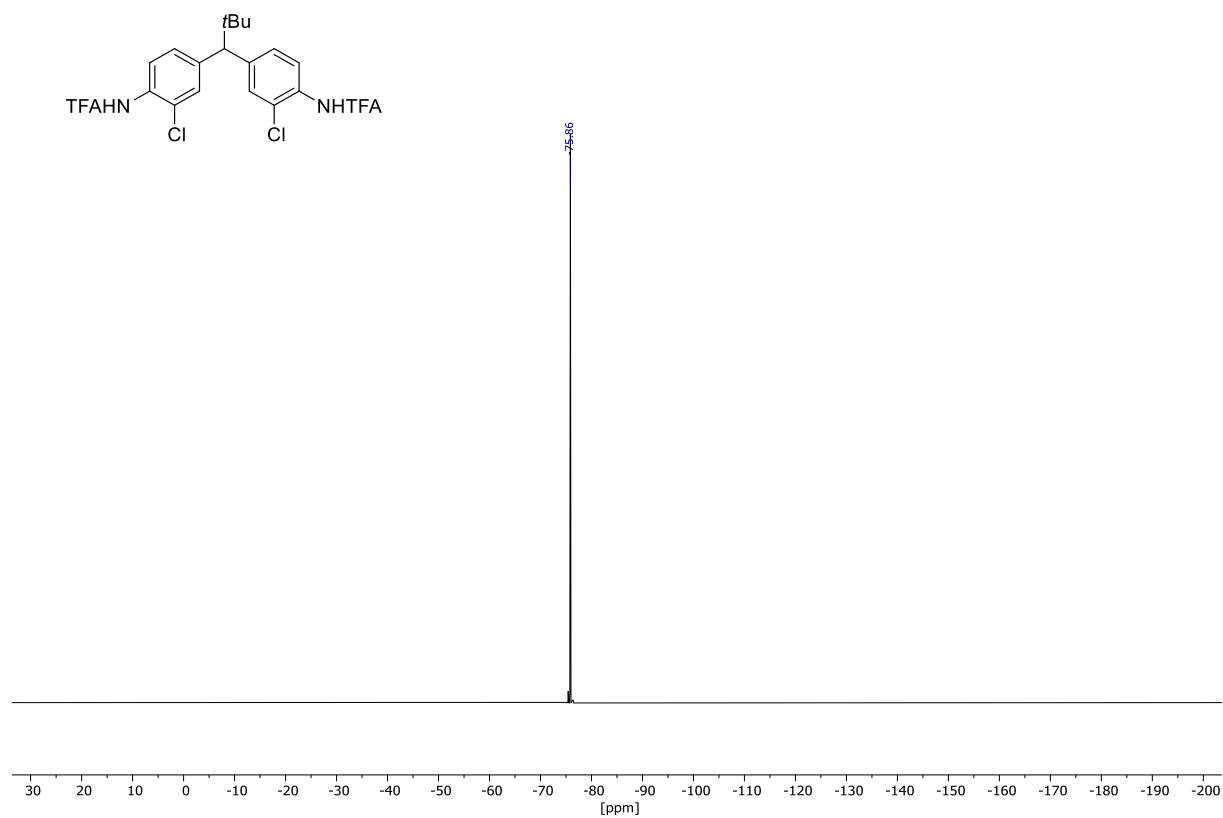

**$^1\text{H}$  NMR (400 MHz,  $\text{CDCl}_3$ ): 3**

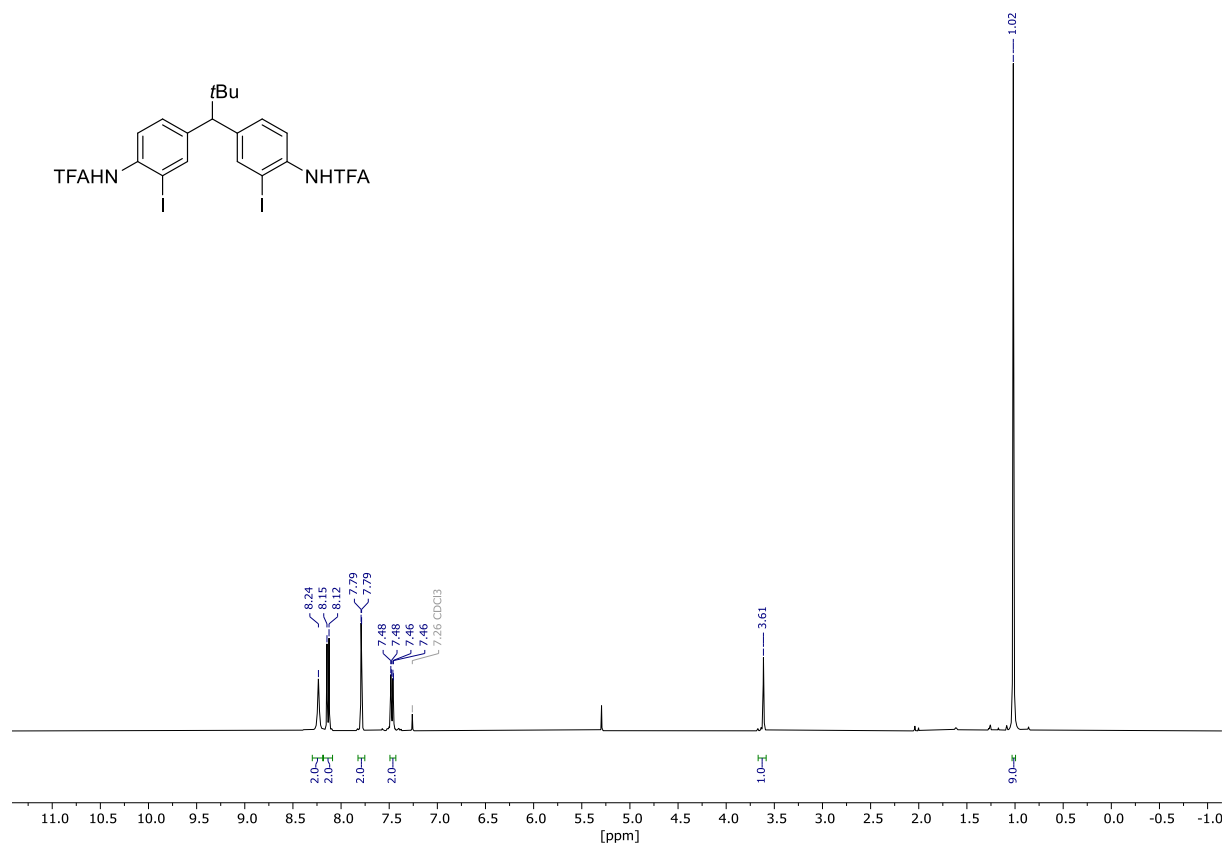

**$^{13}\text{C}$  NMR (101 MHz,  $\text{CDCl}_3$ ): 3**

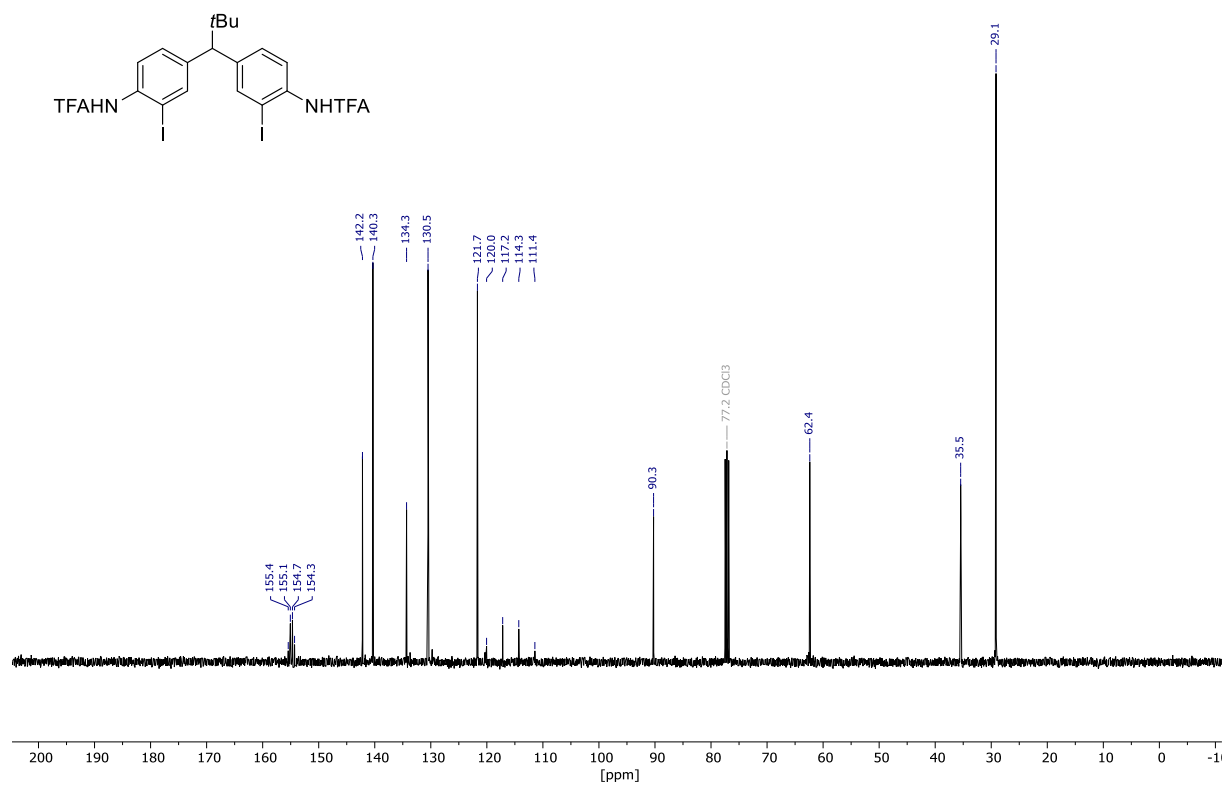

**$^{19}\text{F}$  NMR (376 MHz,  $\text{CDCl}_3$ ): 3**

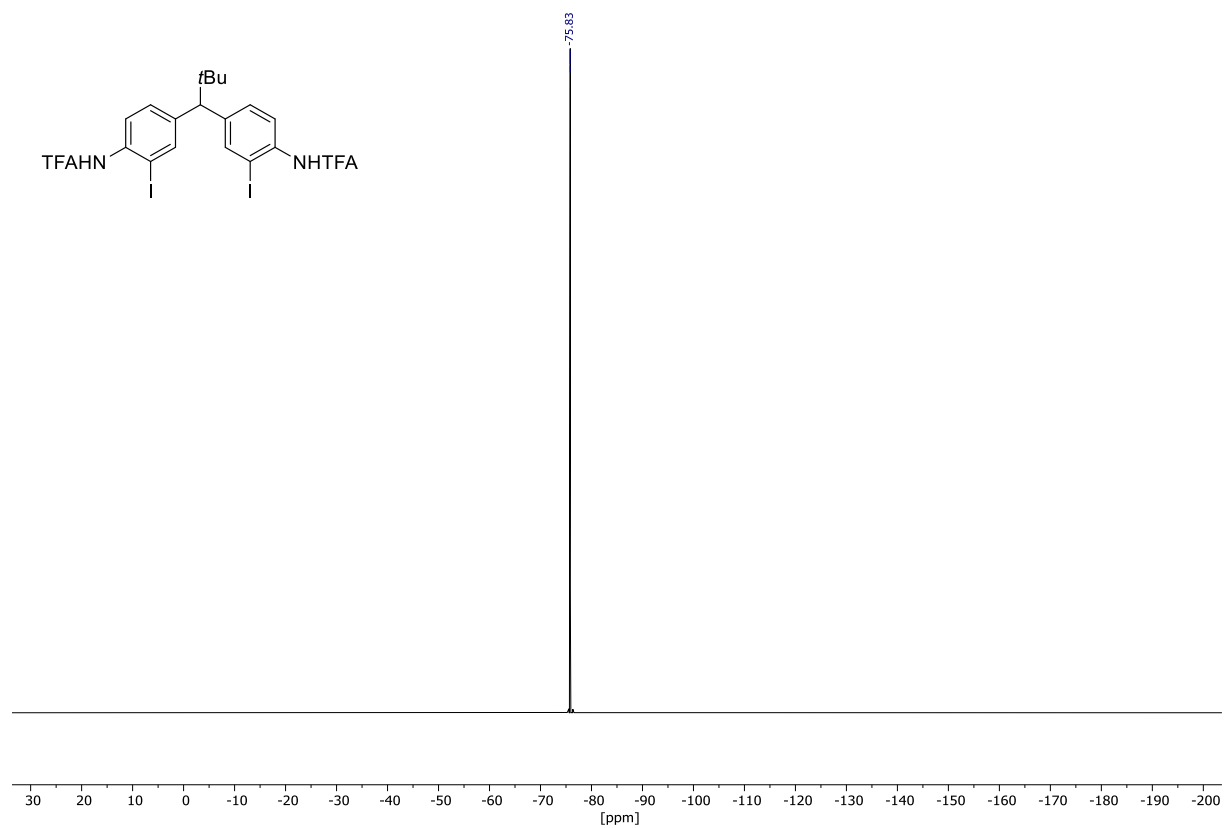

**<sup>1</sup>H NMR (400 MHz, *d*<sub>6</sub>-DMSO): S10**

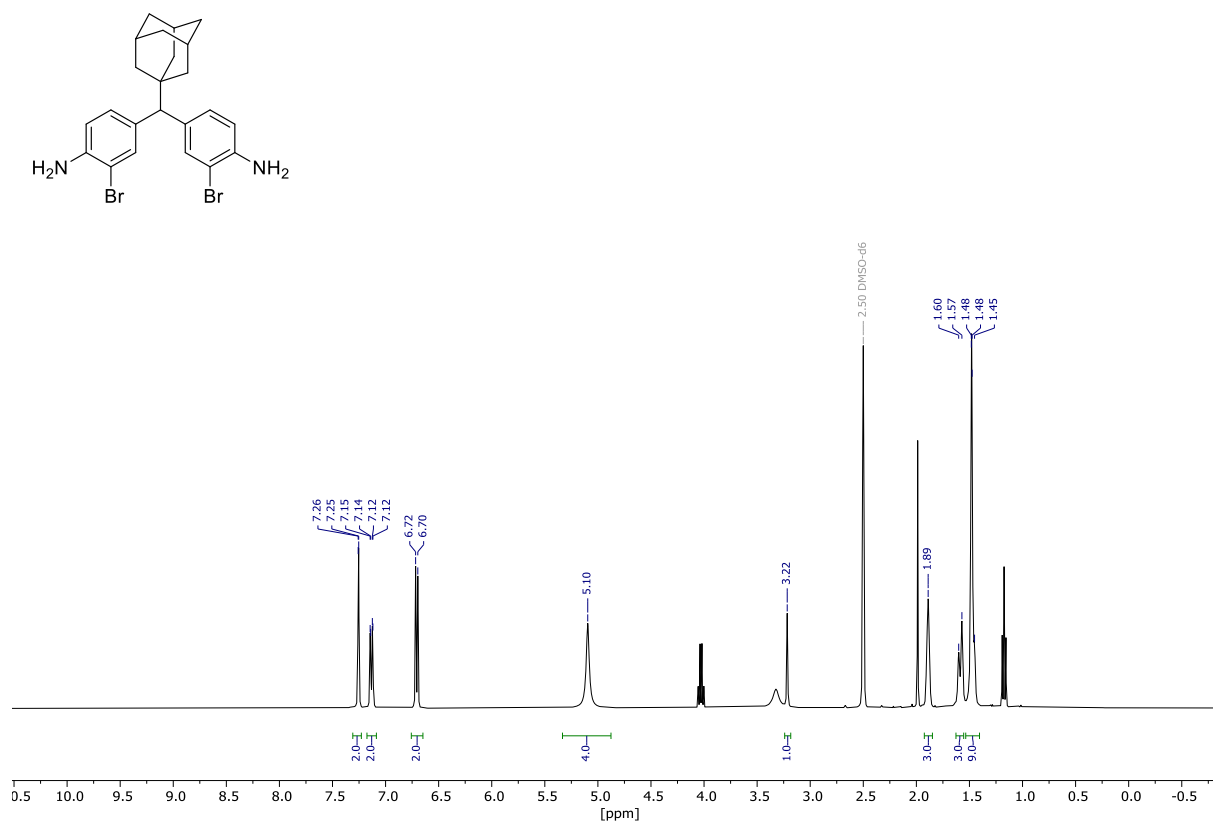

**<sup>13</sup>C NMR (101 MHz, *d*<sub>6</sub>-DMSO): S10**

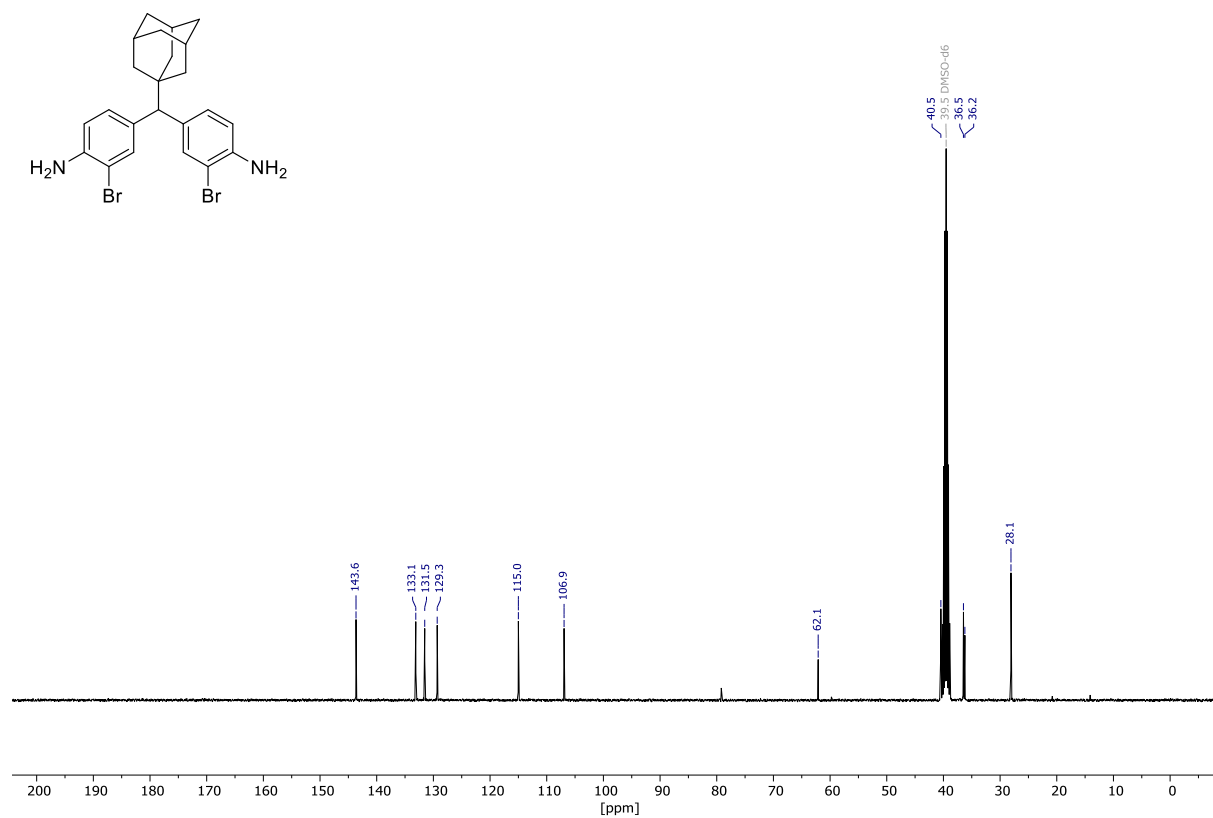

**<sup>1</sup>H NMR (400 MHz, CDCl<sub>3</sub>): S11**

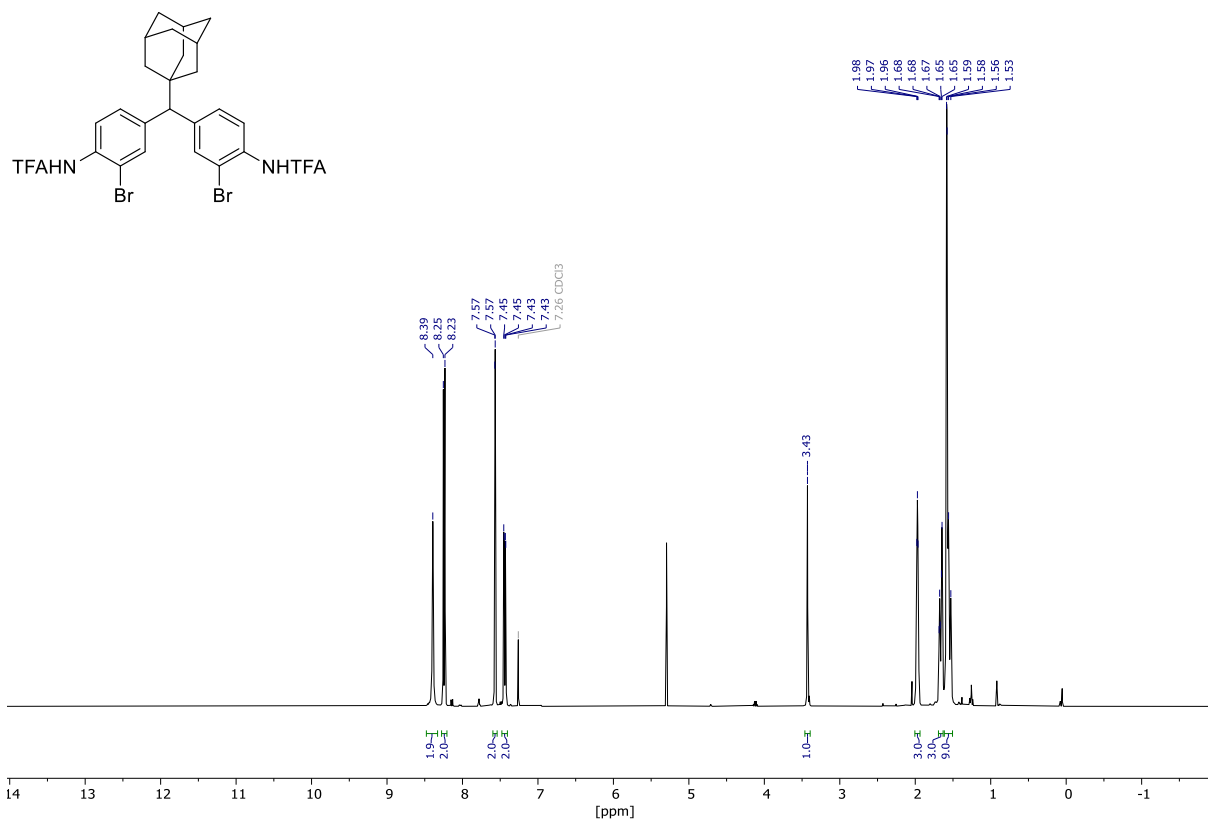

**<sup>13</sup>C NMR (101 MHz, CDCl<sub>3</sub>): S11**

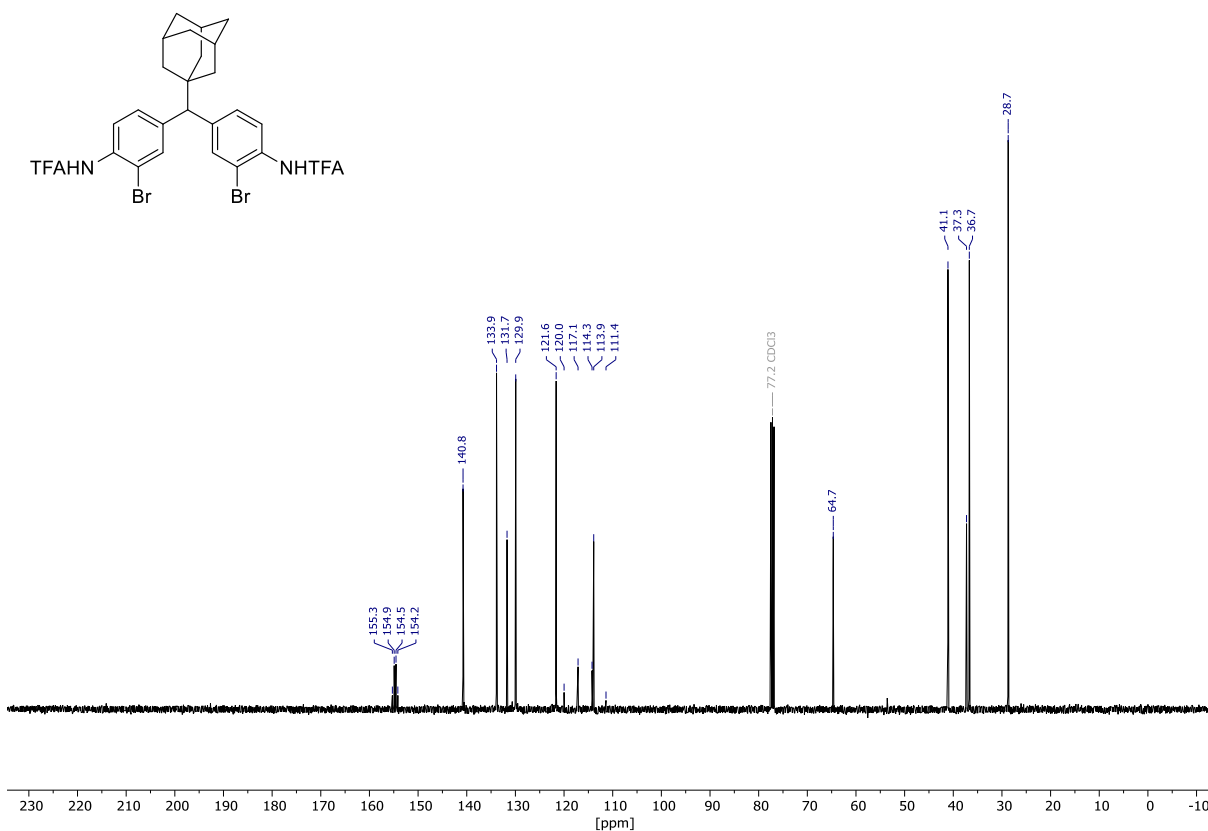

**$^{19}\text{F}$  NMR (376 MHz,  $\text{CDCl}_3$ ): S11**

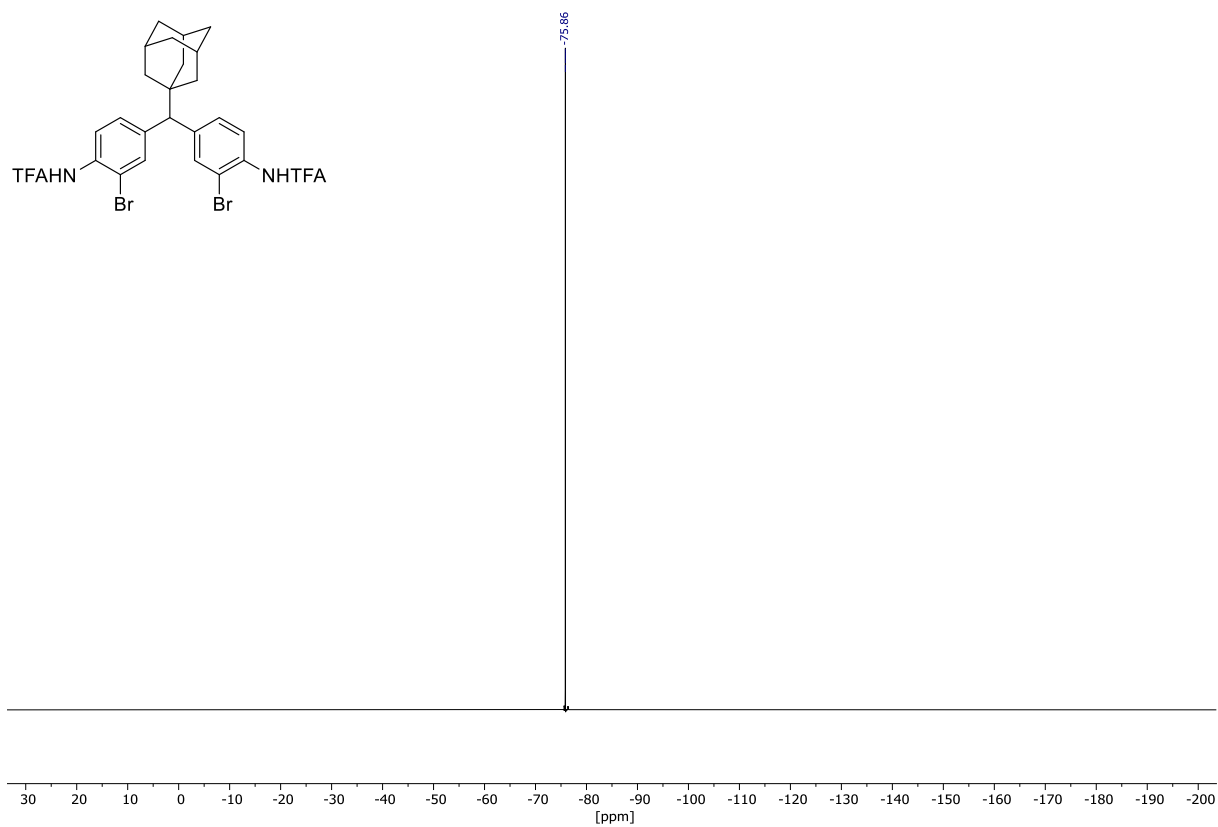

**$^1\text{H}$  NMR (400 MHz,  $\text{CDCl}_3$ ): S12**

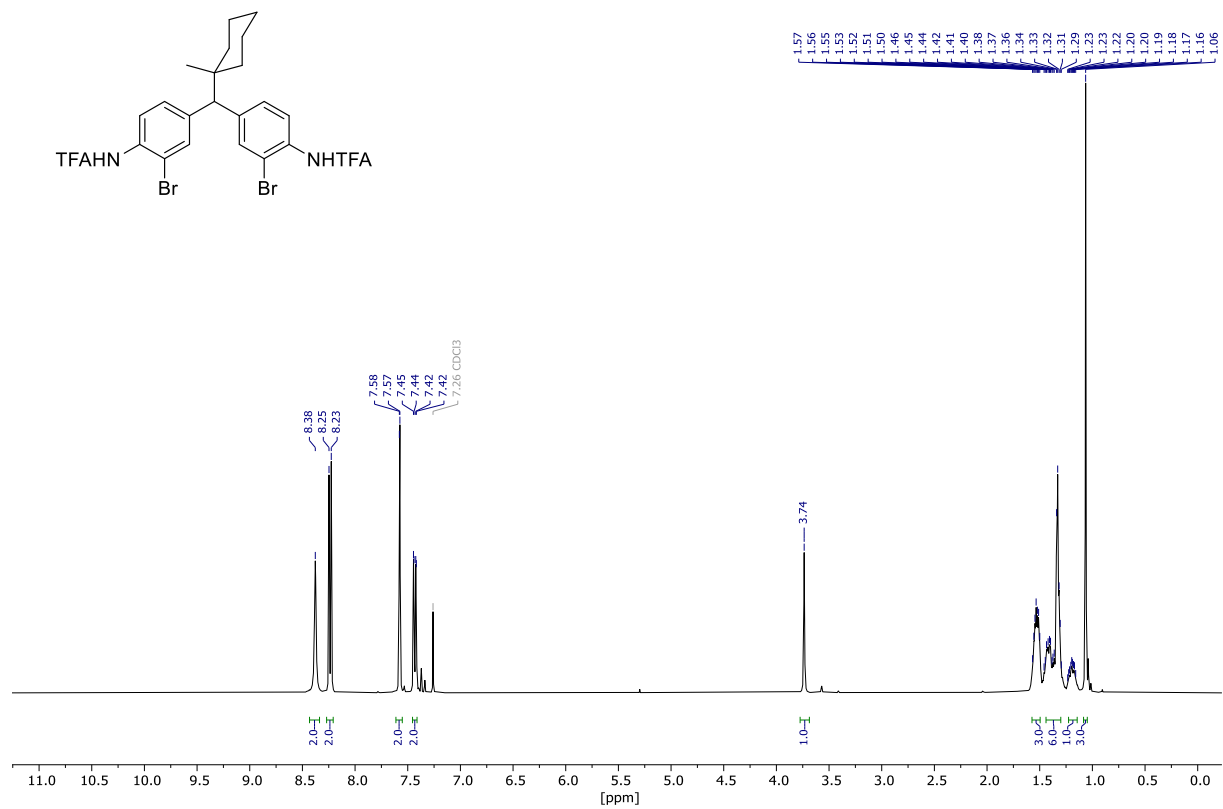

**<sup>13</sup>C NMR (101 MHz, CDCl<sub>3</sub>): S12**

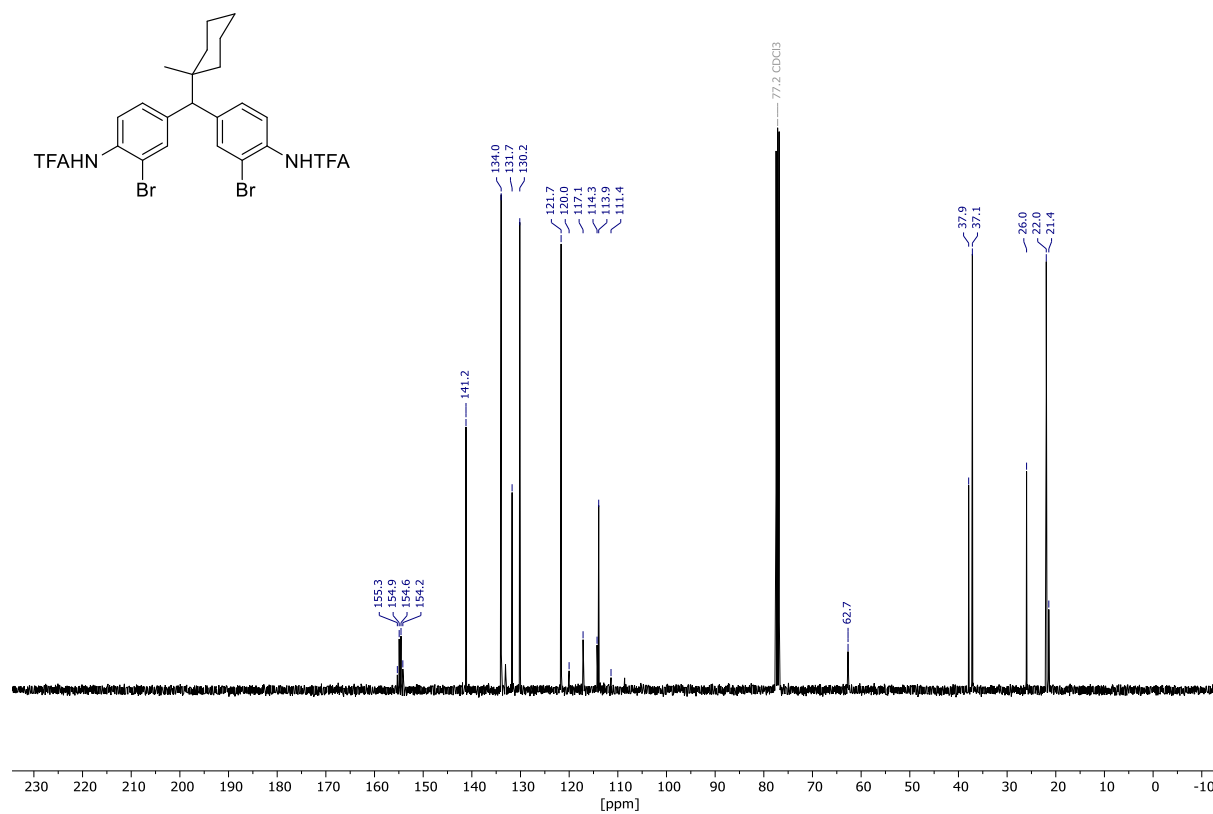

**<sup>19</sup>F NMR (376 MHz, CDCl<sub>3</sub>): S12**

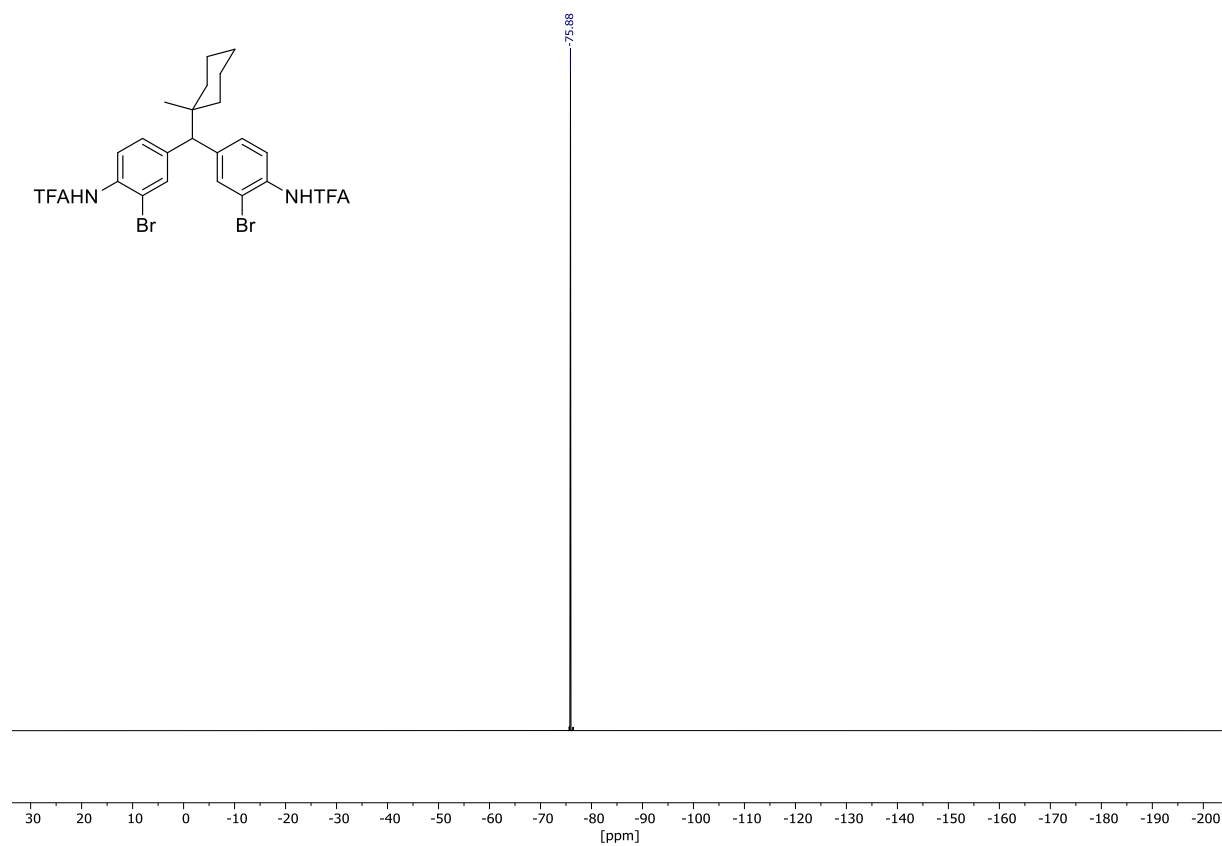

**<sup>1</sup>H NMR (400 MHz, CDCl<sub>3</sub>): S13**

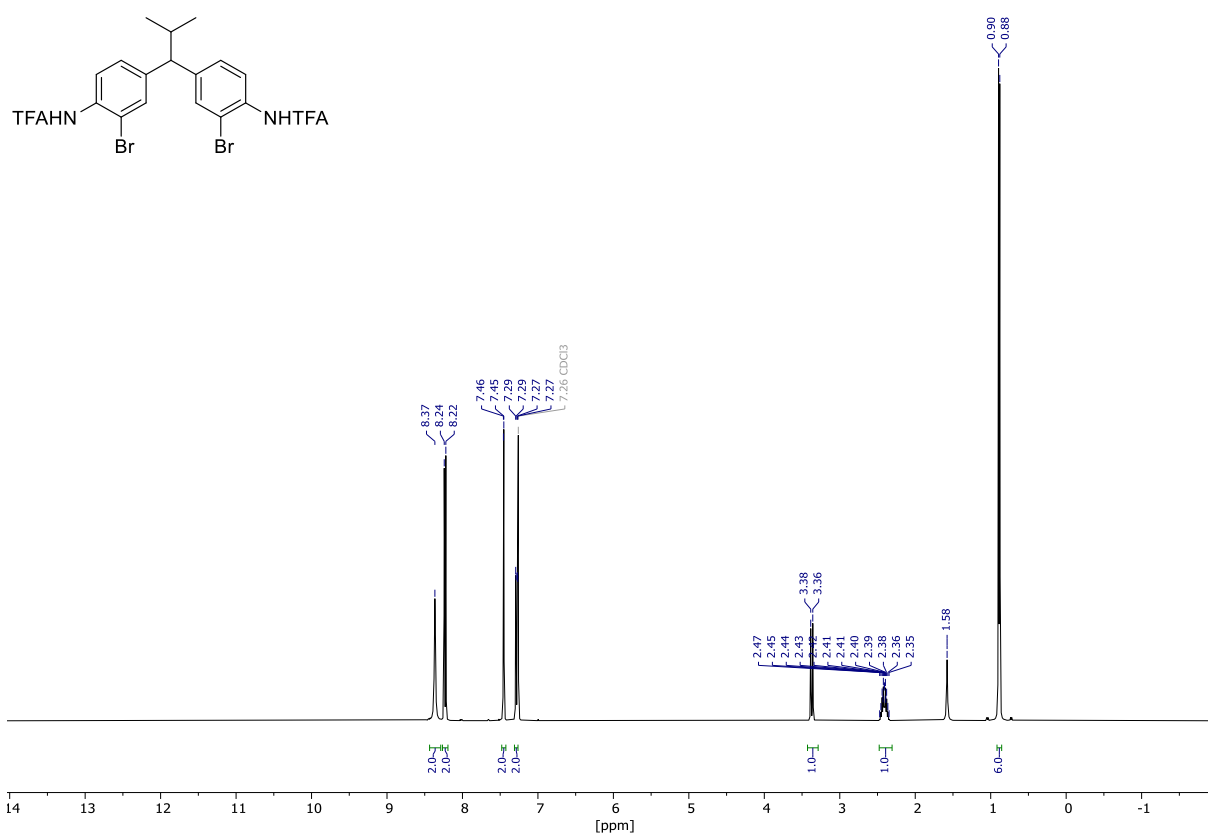

**<sup>13</sup>C NMR (101 MHz, CDCl<sub>3</sub>): S13**

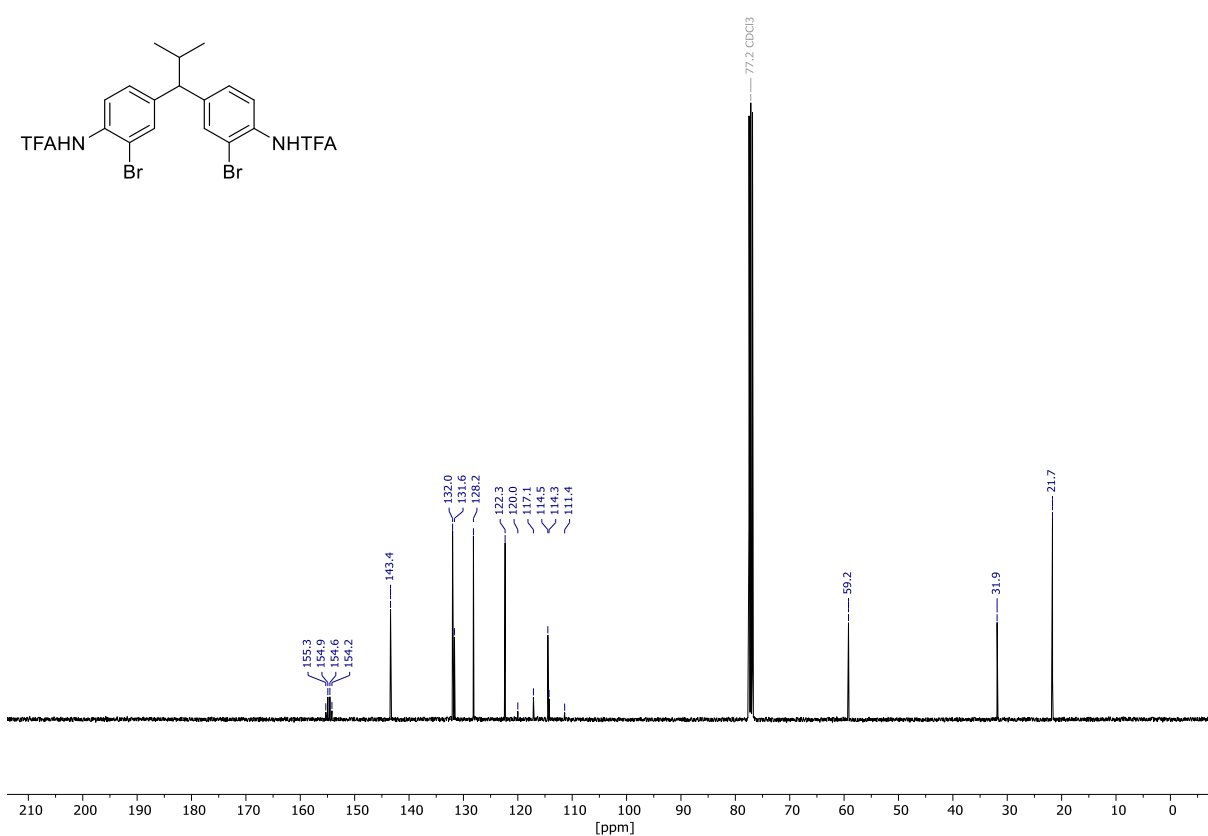



**$^{19}\text{F}$  NMR (376 MHz,  $\text{CDCl}_3$ ): S13**

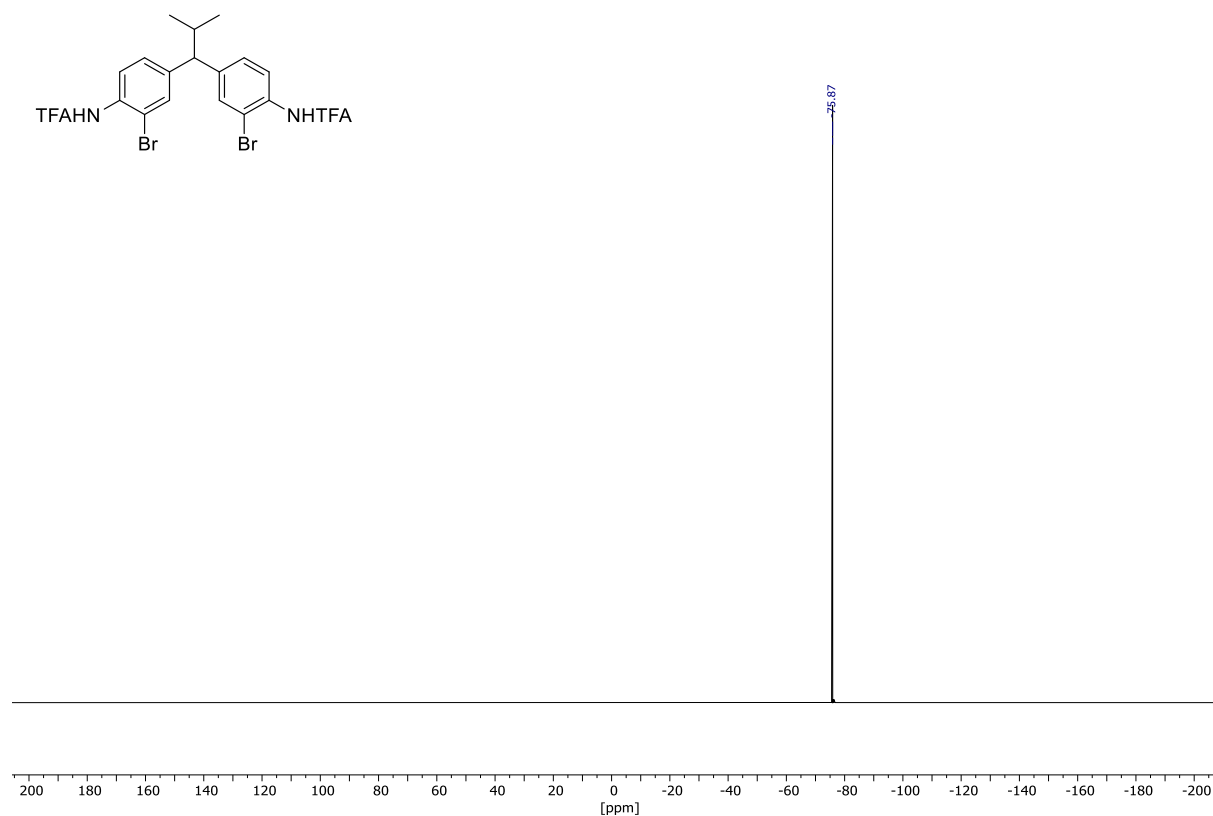

**$^1\text{H}$  NMR (400 MHz,  $\text{CDCl}_3$ ): 2 (obtained as inseparable mixture, containing 1 and 3)**

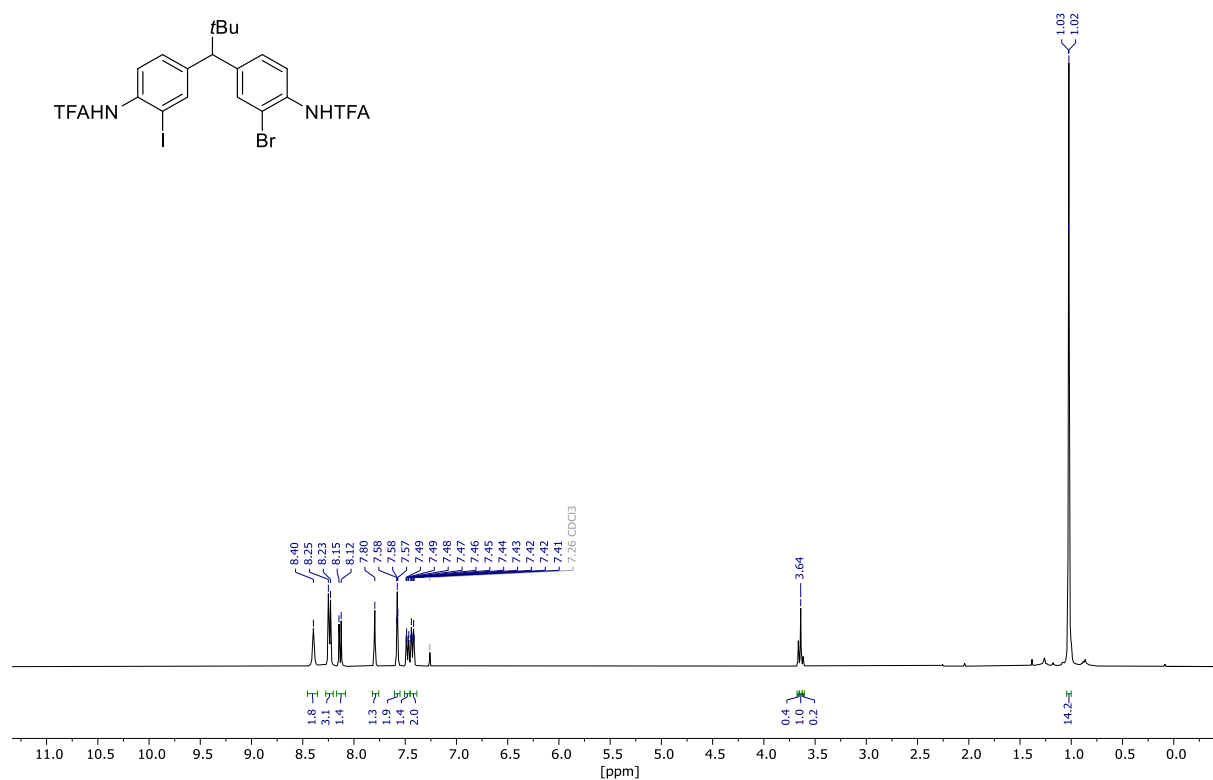

**<sup>13</sup>C NMR (101 MHz, CDCl<sub>3</sub>): 2**

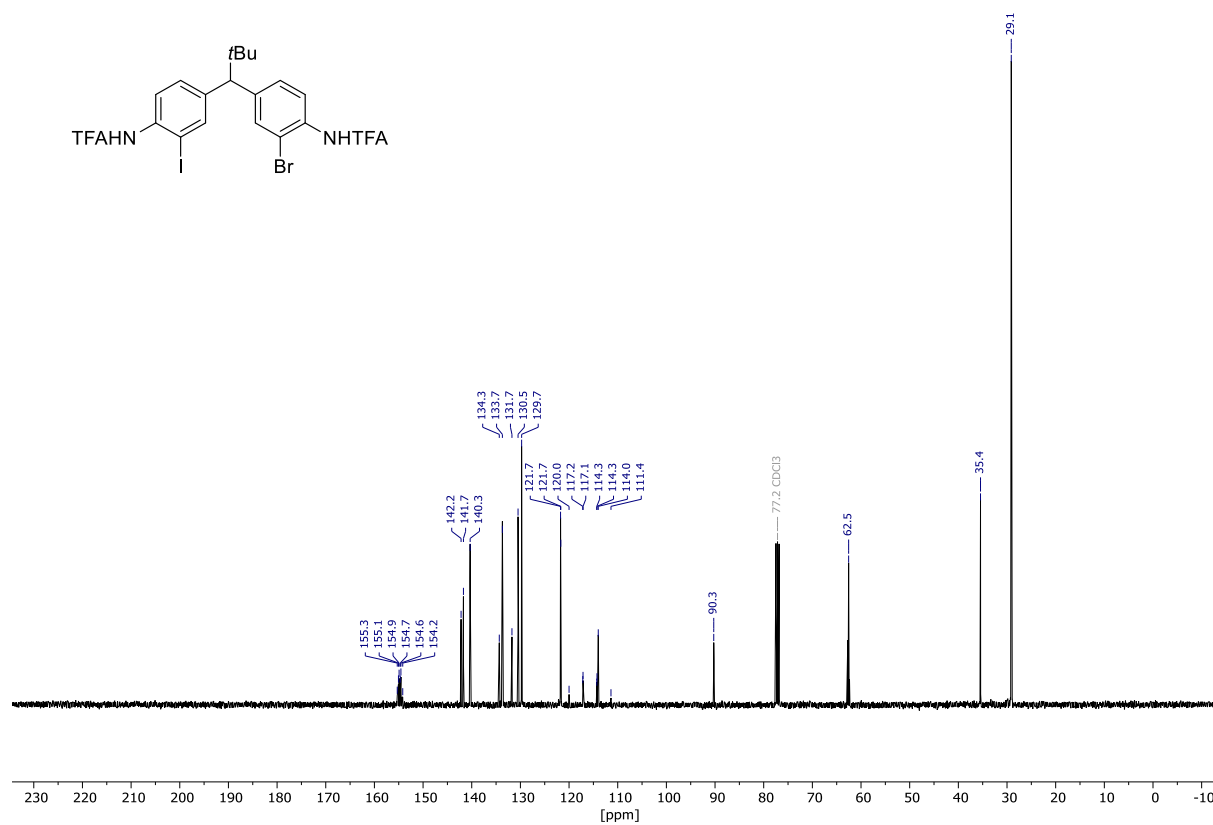

**<sup>19</sup>F NMR (376 MHz, CDCl<sub>3</sub>): 2**

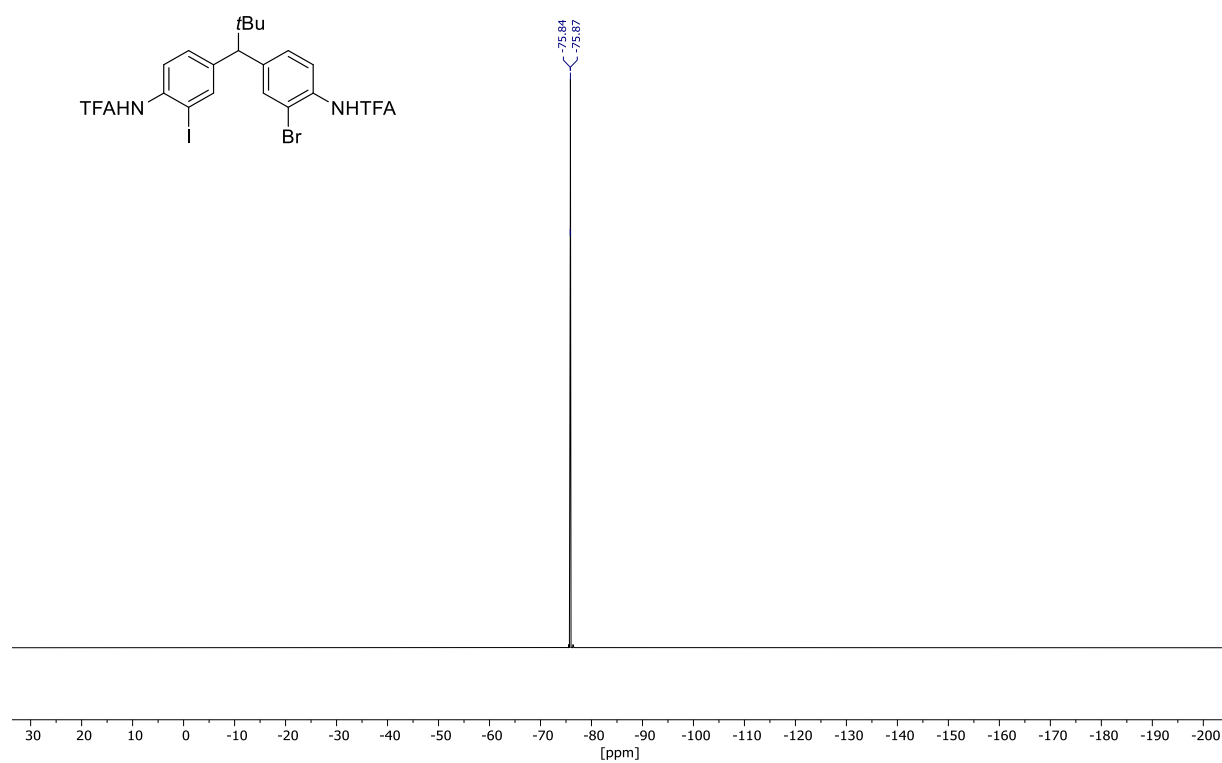

**<sup>1</sup>H NMR (400 MHz, CDCl<sub>3</sub>): 4**

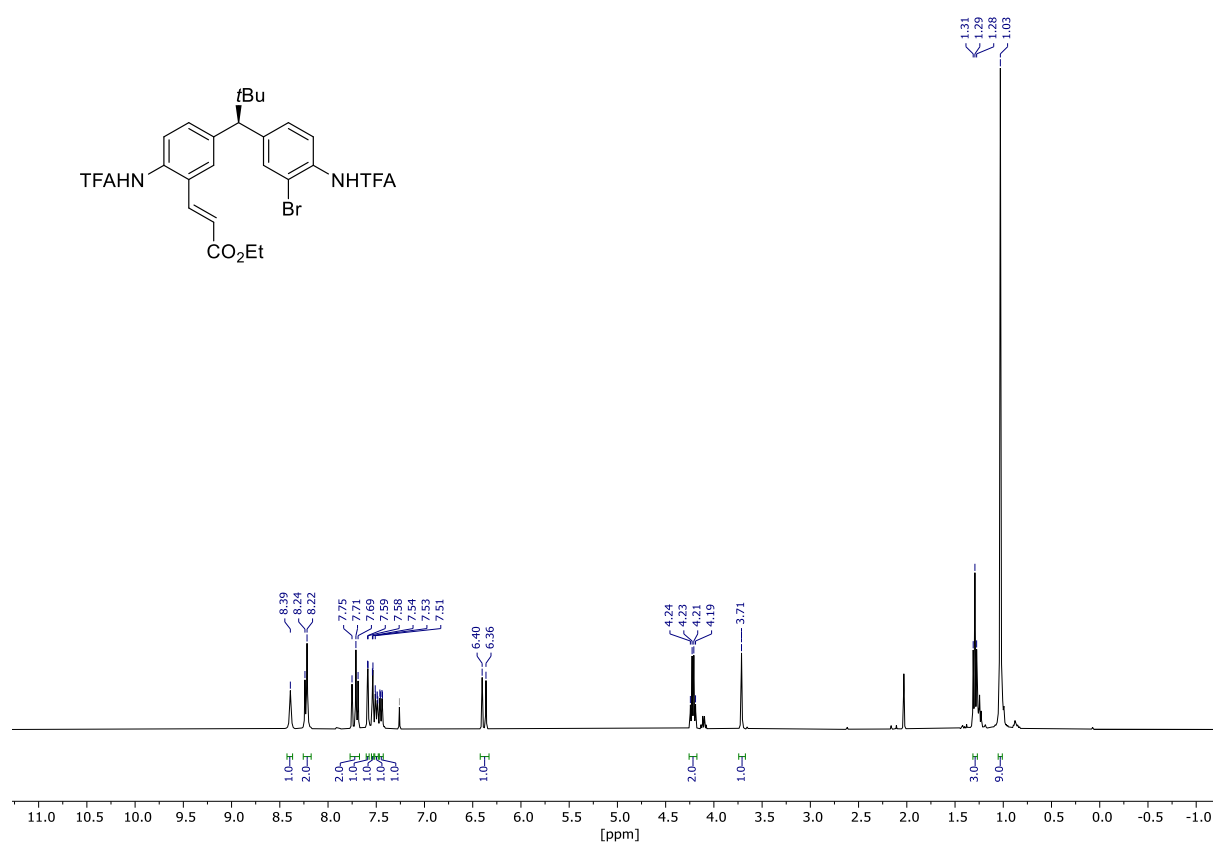

**<sup>13</sup>C NMR (101 MHz, CDCl<sub>3</sub>): 4**

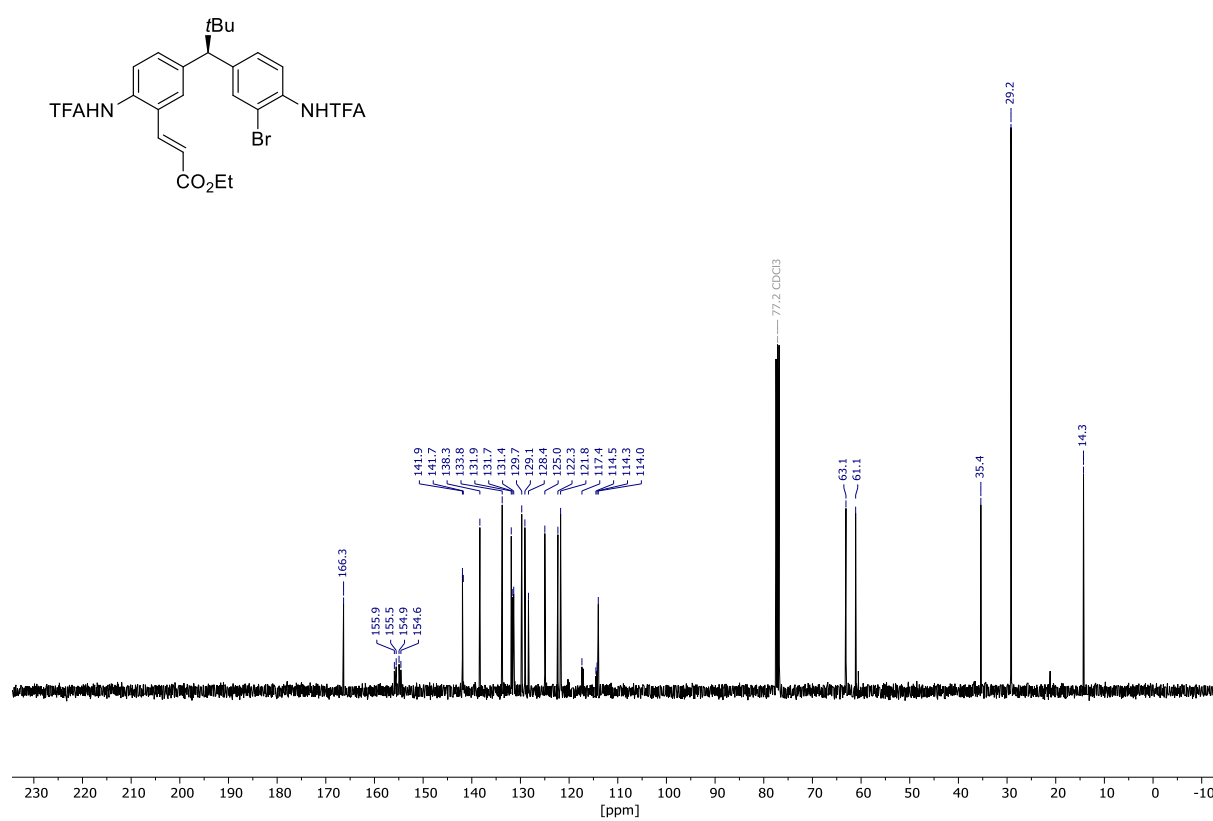

**$^{19}\text{F}$  NMR (376 MHz,  $\text{CDCl}_3$ ): 4**

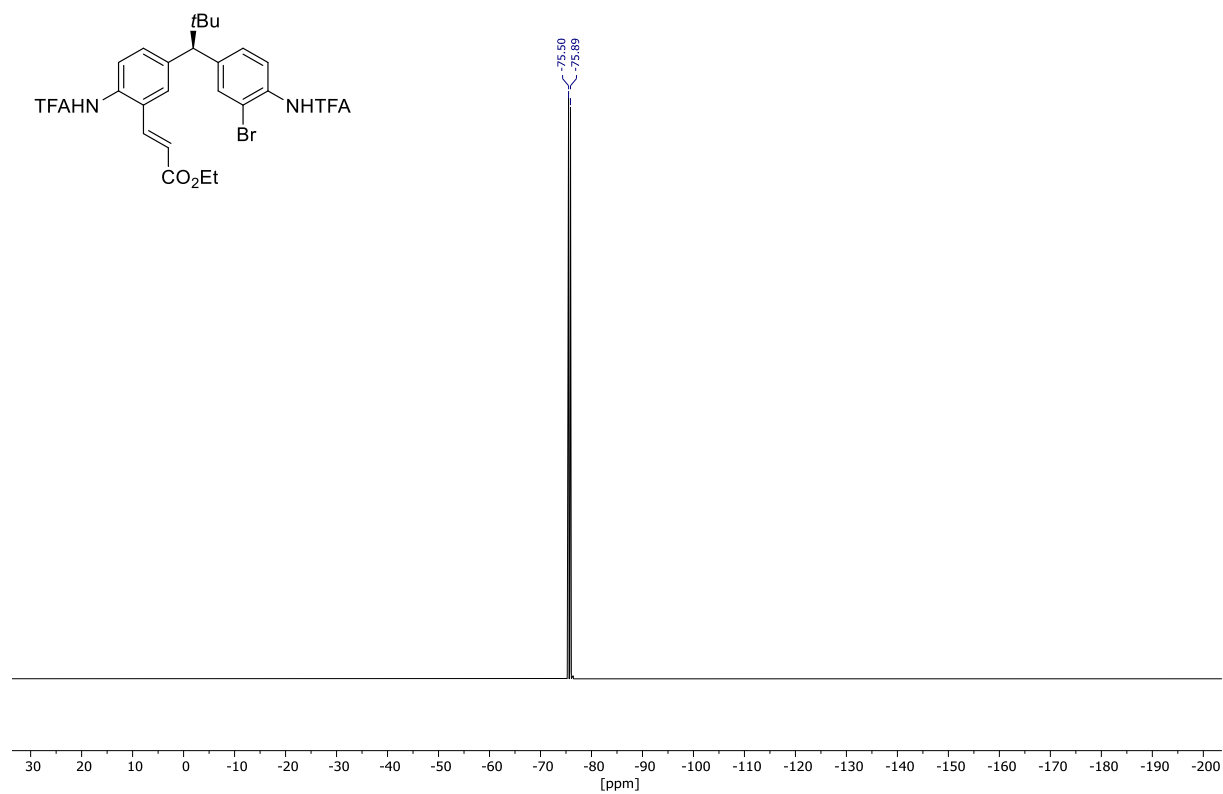

**$^1\text{H}$  NMR (400 MHz,  $\text{CDCl}_3$ ): 9**

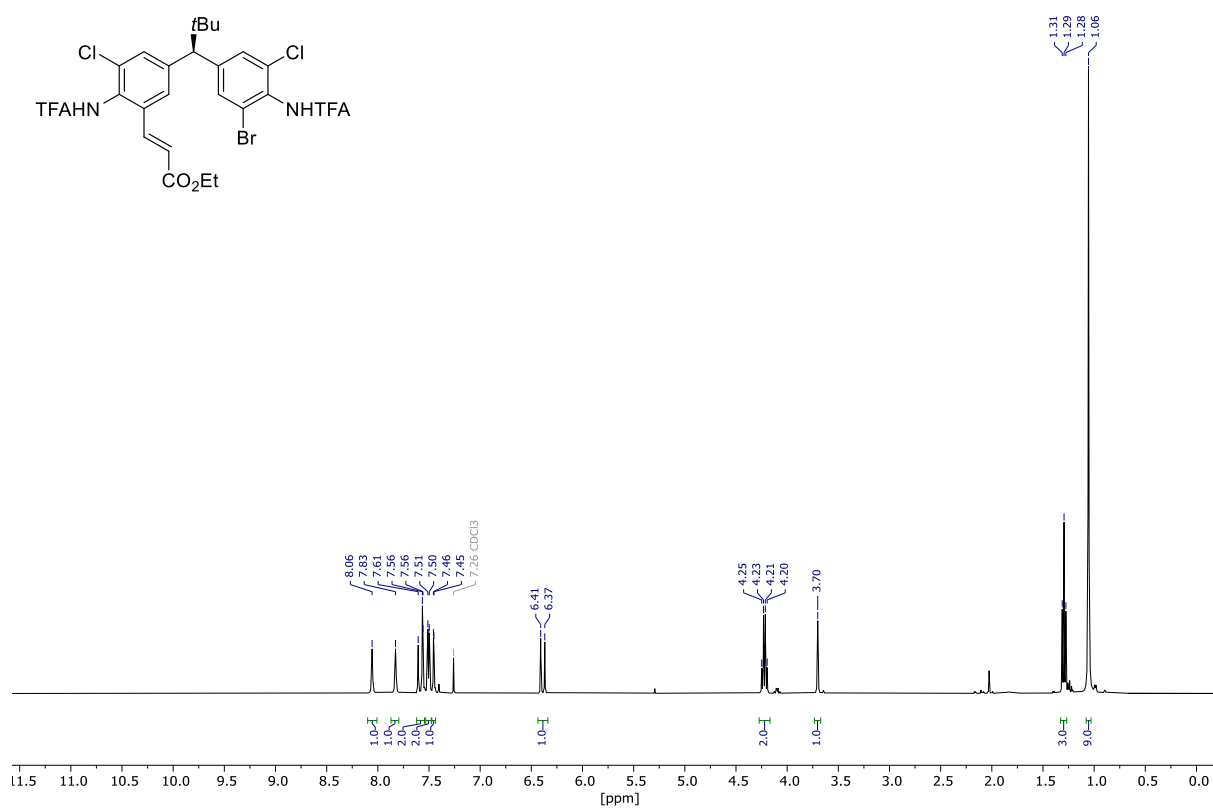

**<sup>13</sup>C NMR (101 MHz, CDCl<sub>3</sub>): 9**

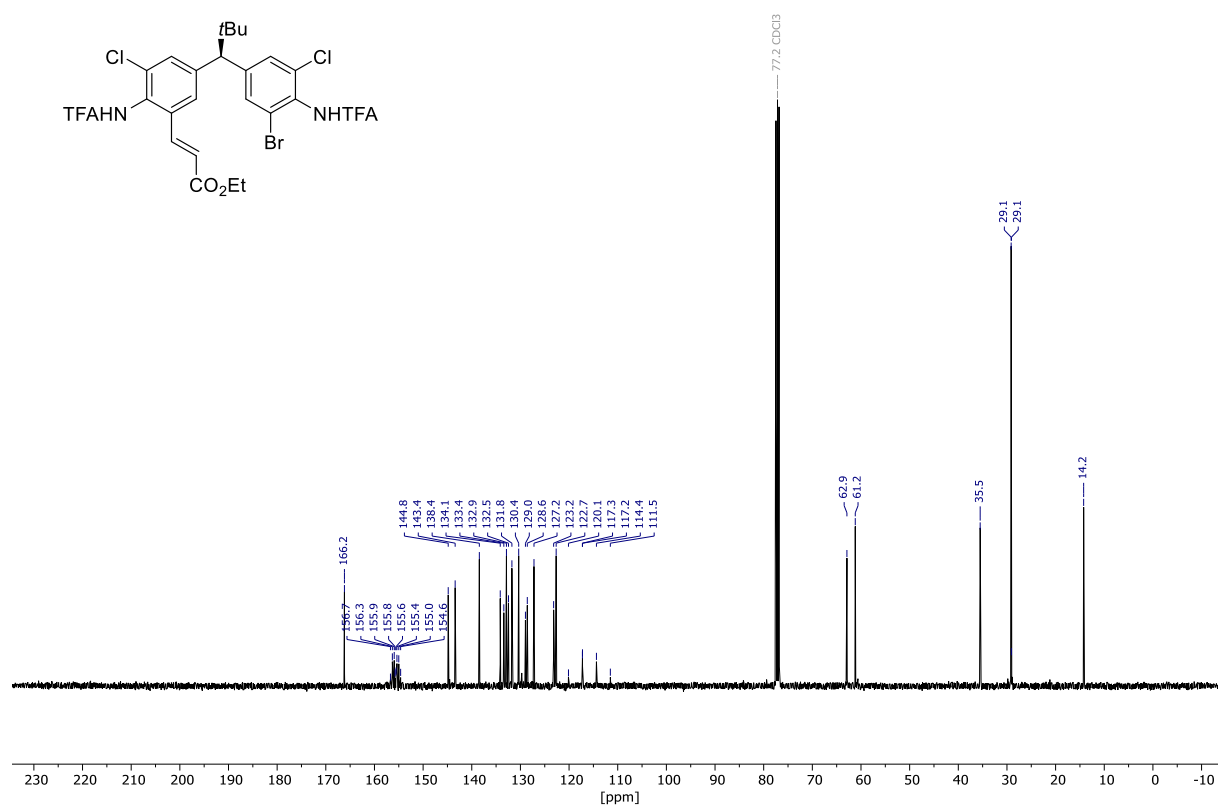

**<sup>19</sup>F NMR (376 MHz, CDCl<sub>3</sub>): 9**

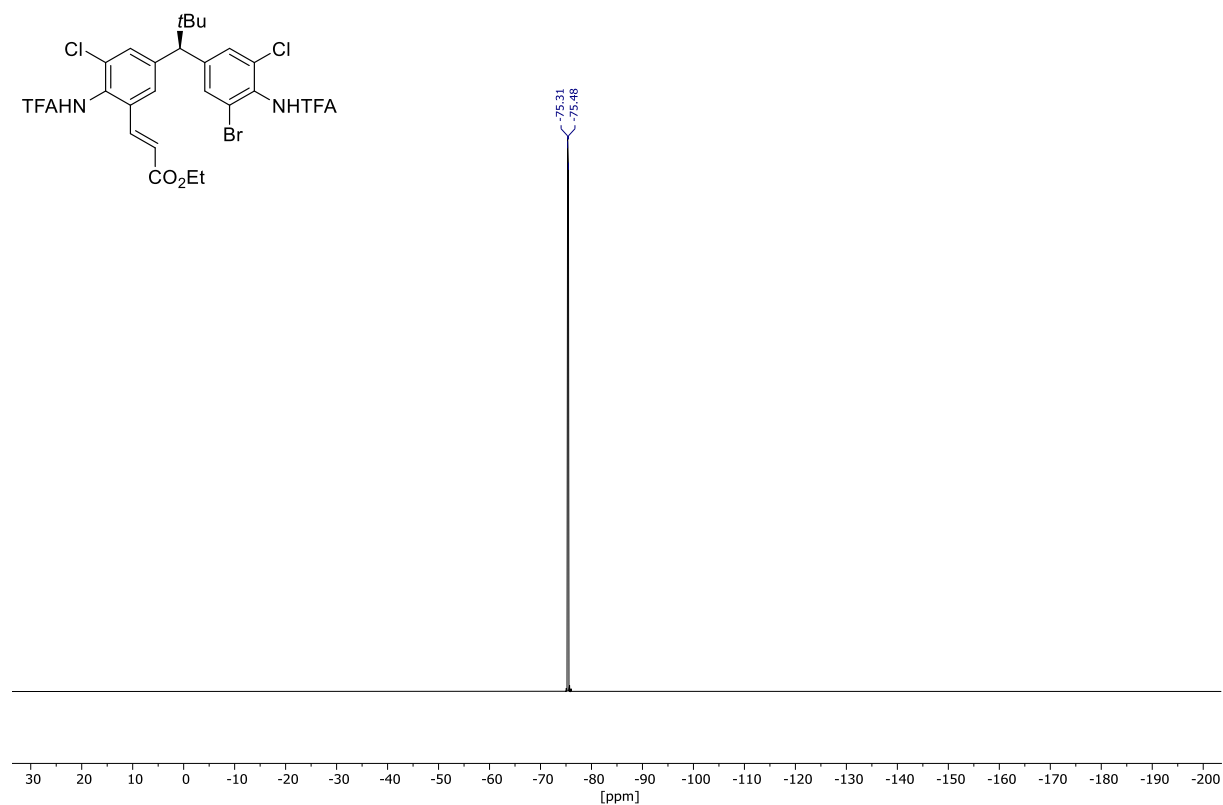

**<sup>1</sup>H NMR (400 MHz, CDCl<sub>3</sub>): 11**

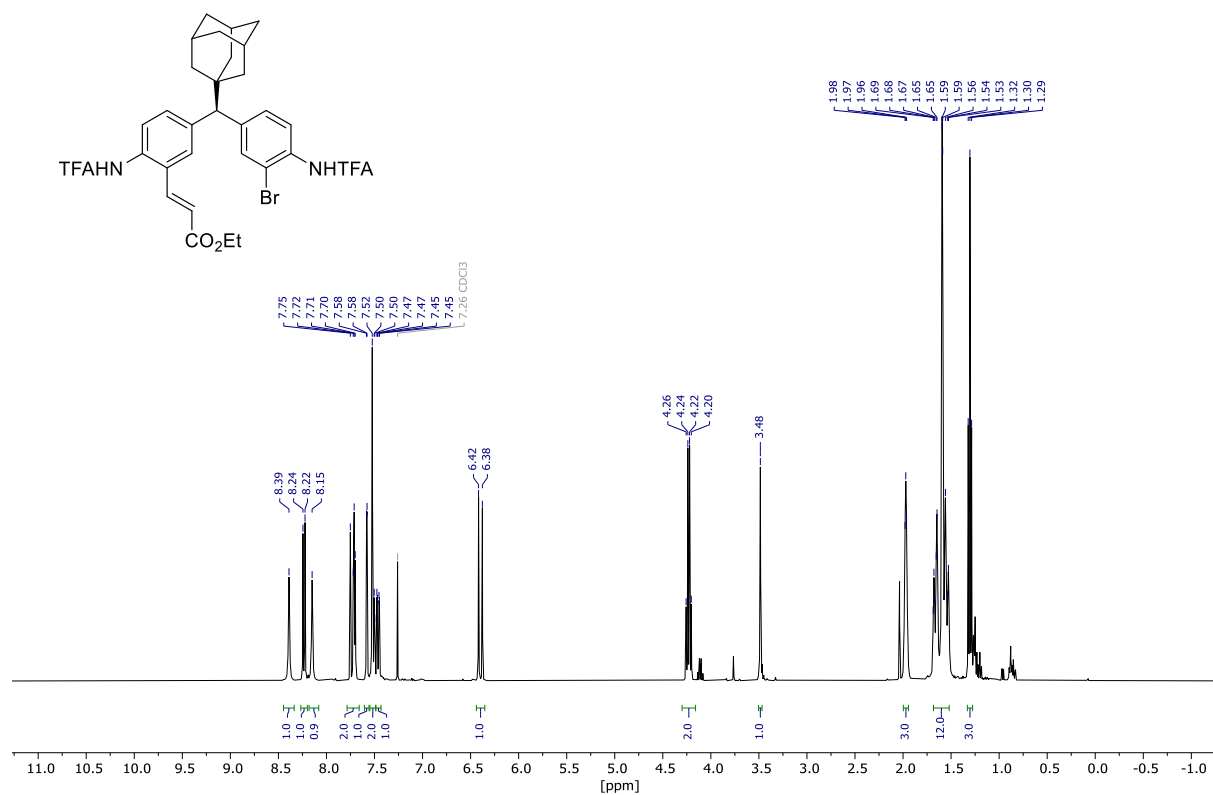

**<sup>13</sup>C NMR (101 MHz, CDCl<sub>3</sub>): 11**

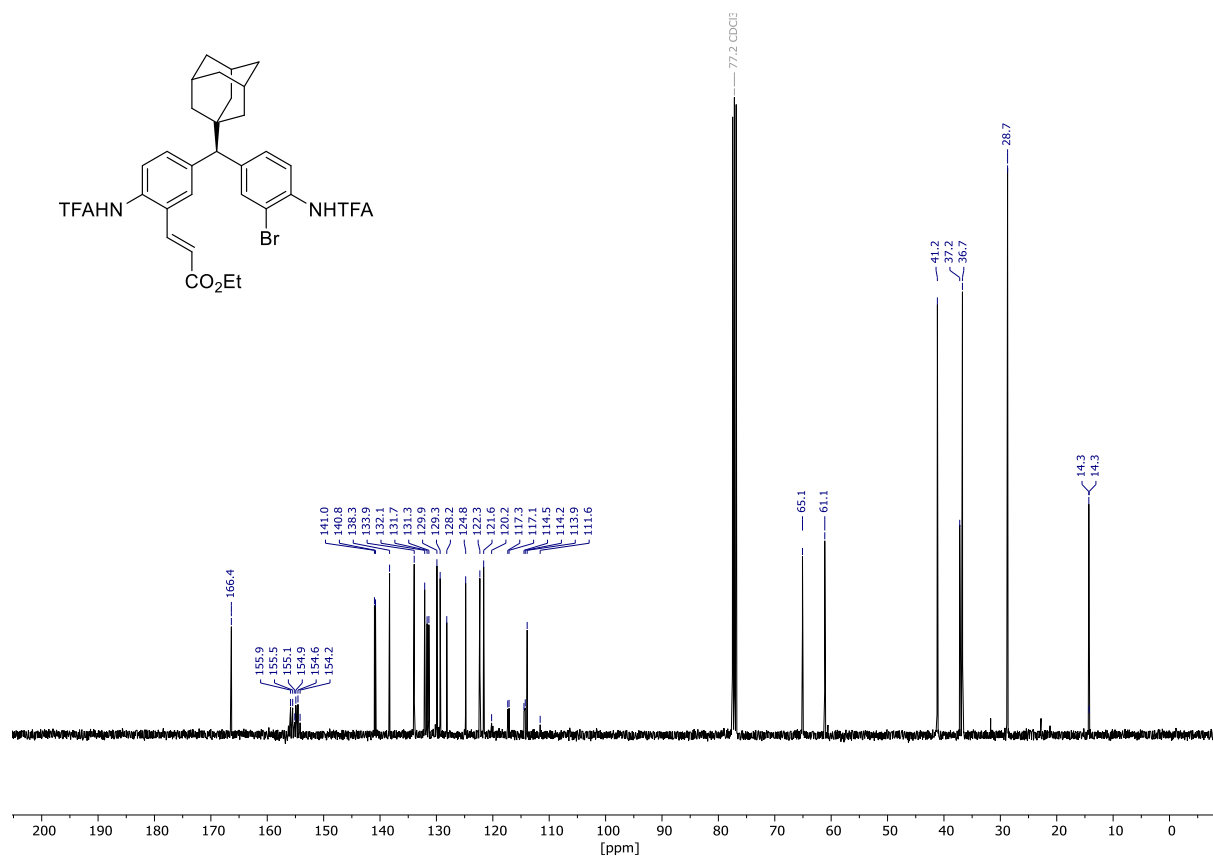

**$^{19}\text{F}$  NMR (376 MHz,  $\text{CDCl}_3$ ): 11**

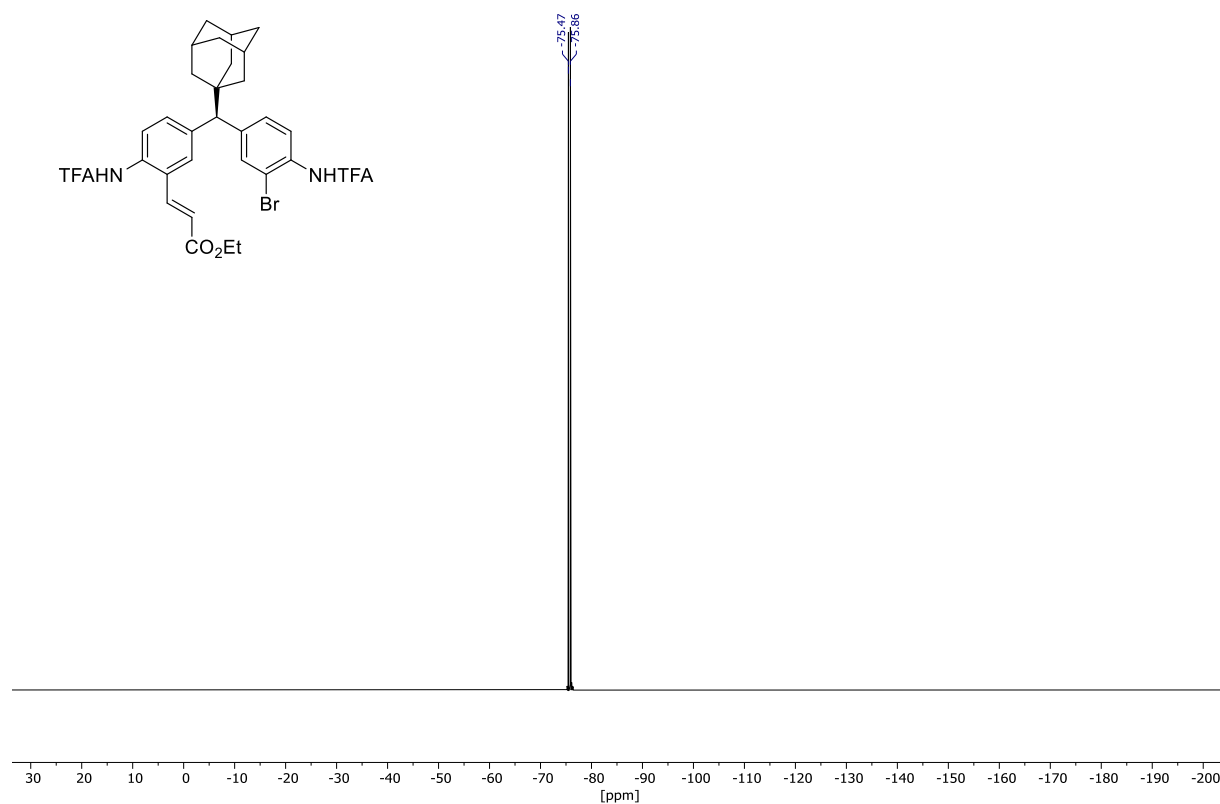

**$^1\text{H}$  NMR (400 MHz,  $\text{CDCl}_3$ ): 12**

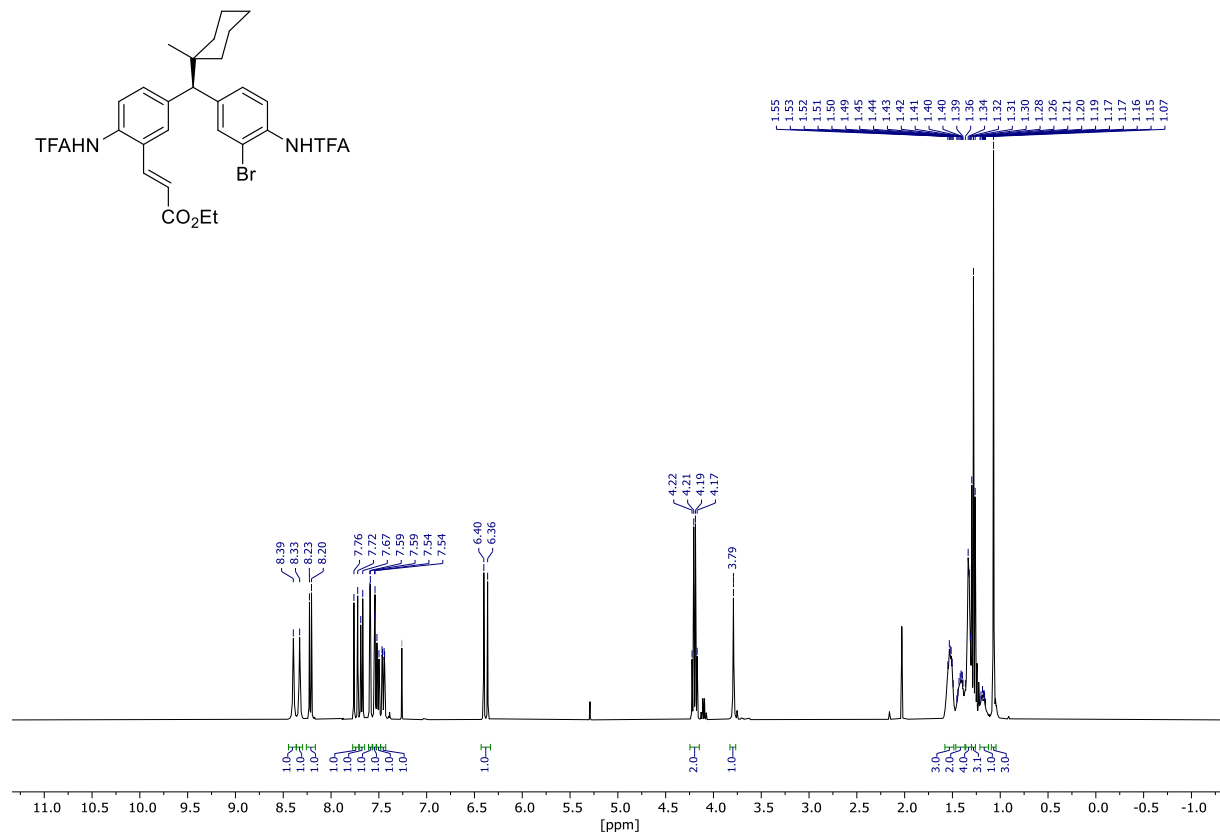

**$^{13}\text{C}$  NMR (101 MHz,  $\text{CDCl}_3$ ): 12**

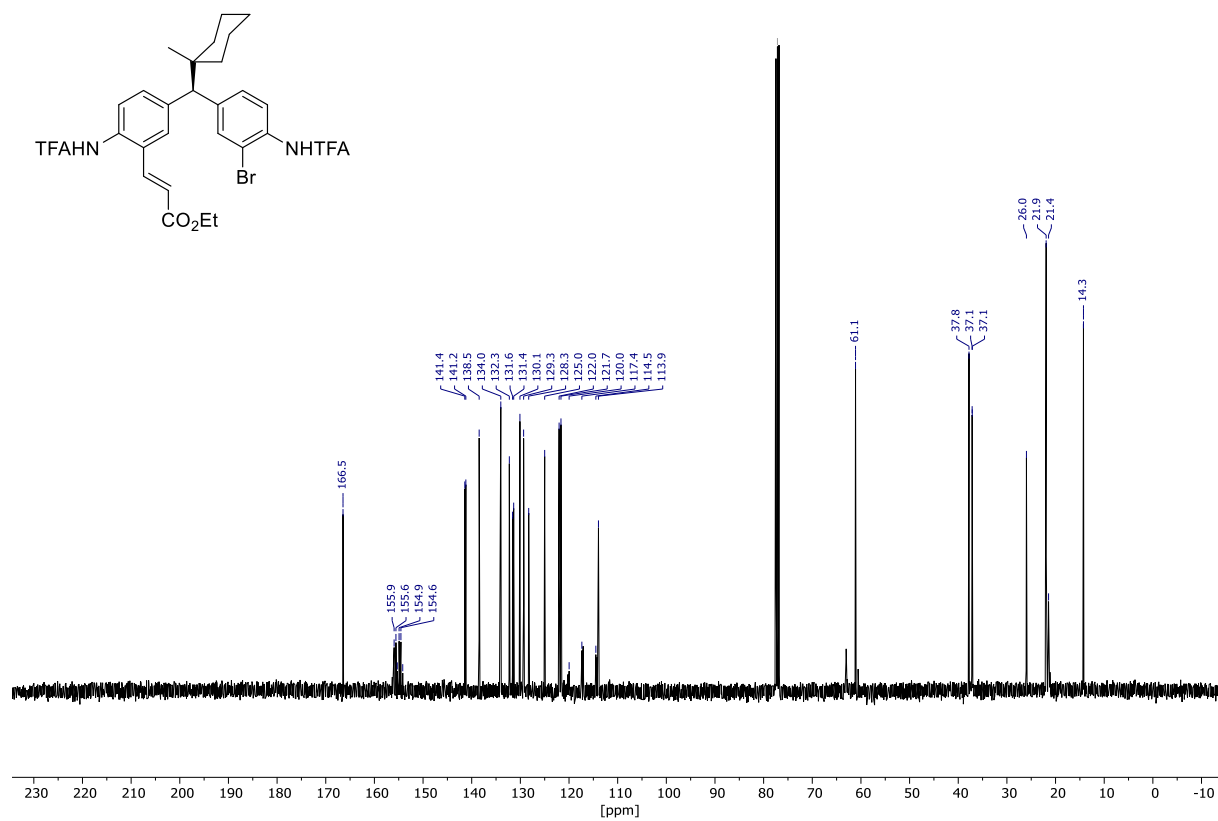

**$^{19}\text{F}$  NMR (376 MHz,  $\text{CDCl}_3$ ): 12**

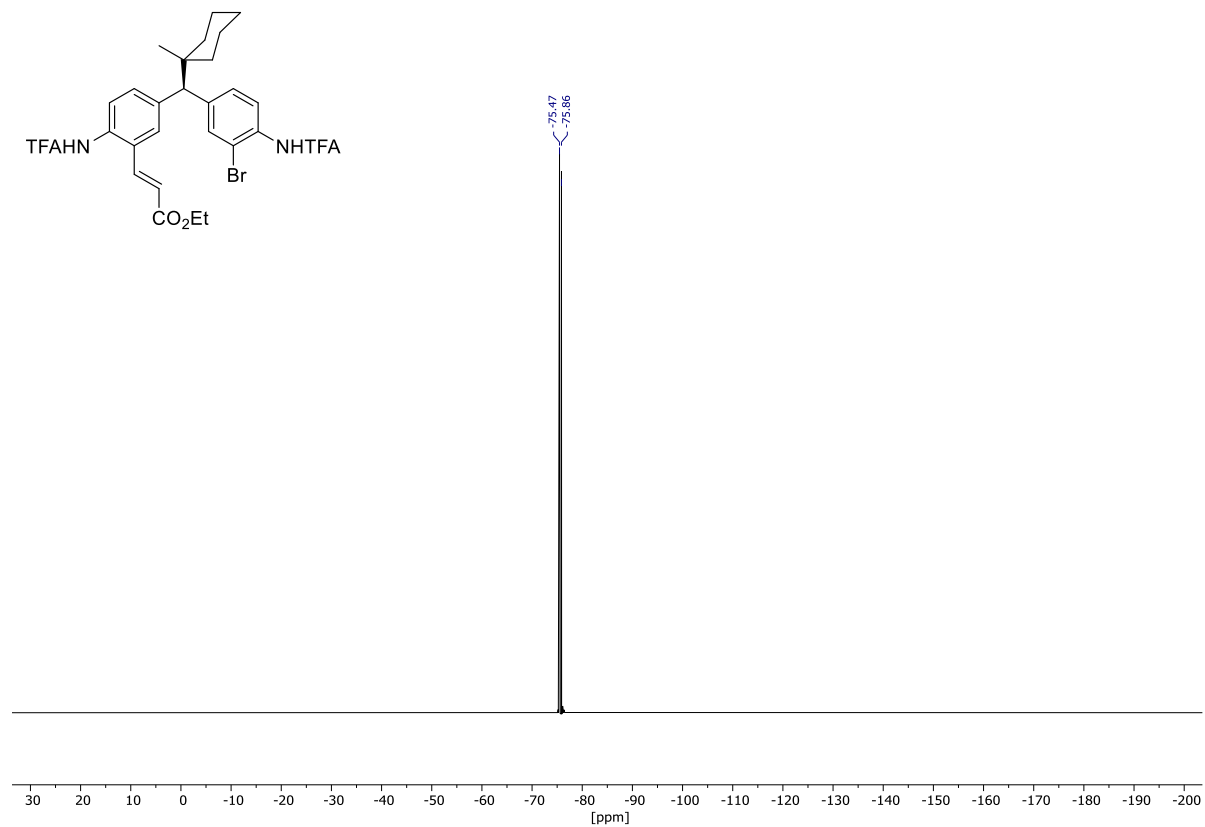



**<sup>1</sup>H NMR (400 MHz, CDCl<sub>3</sub>): 13**

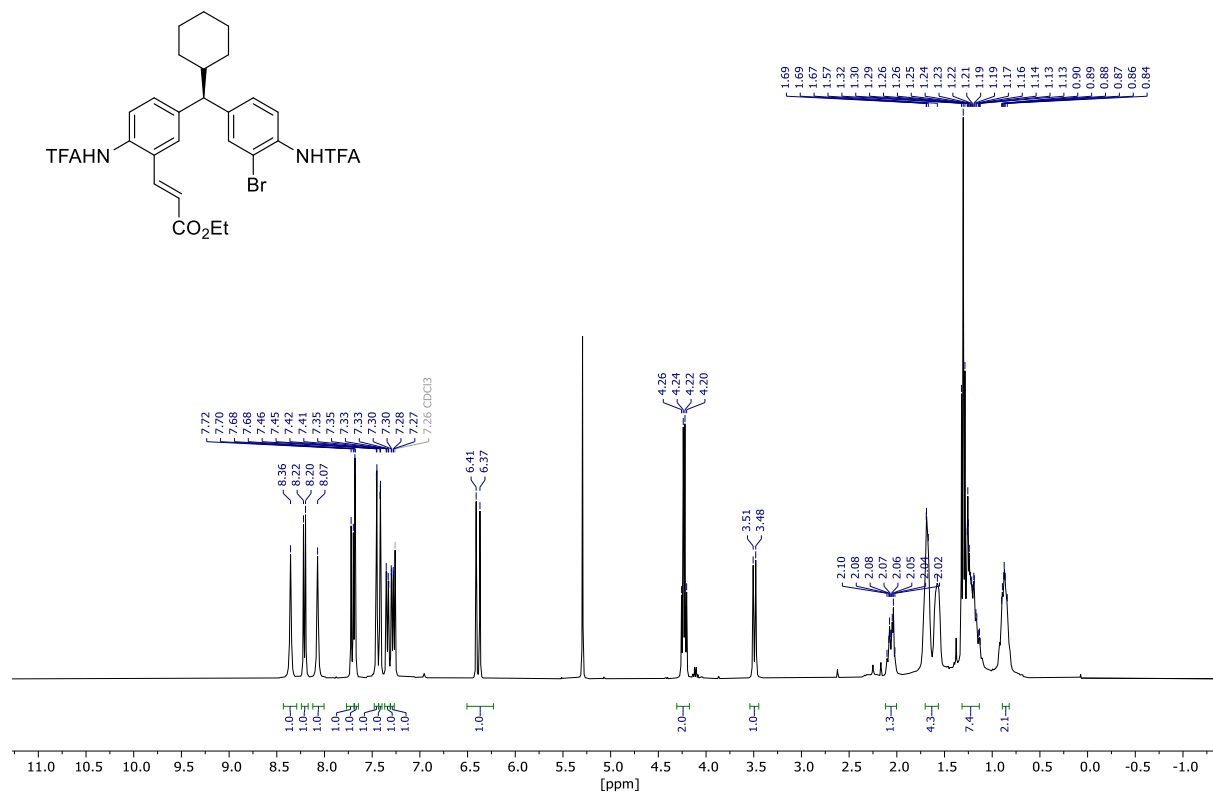

**<sup>13</sup>C NMR (101 MHz, CDCl<sub>3</sub>): 13**

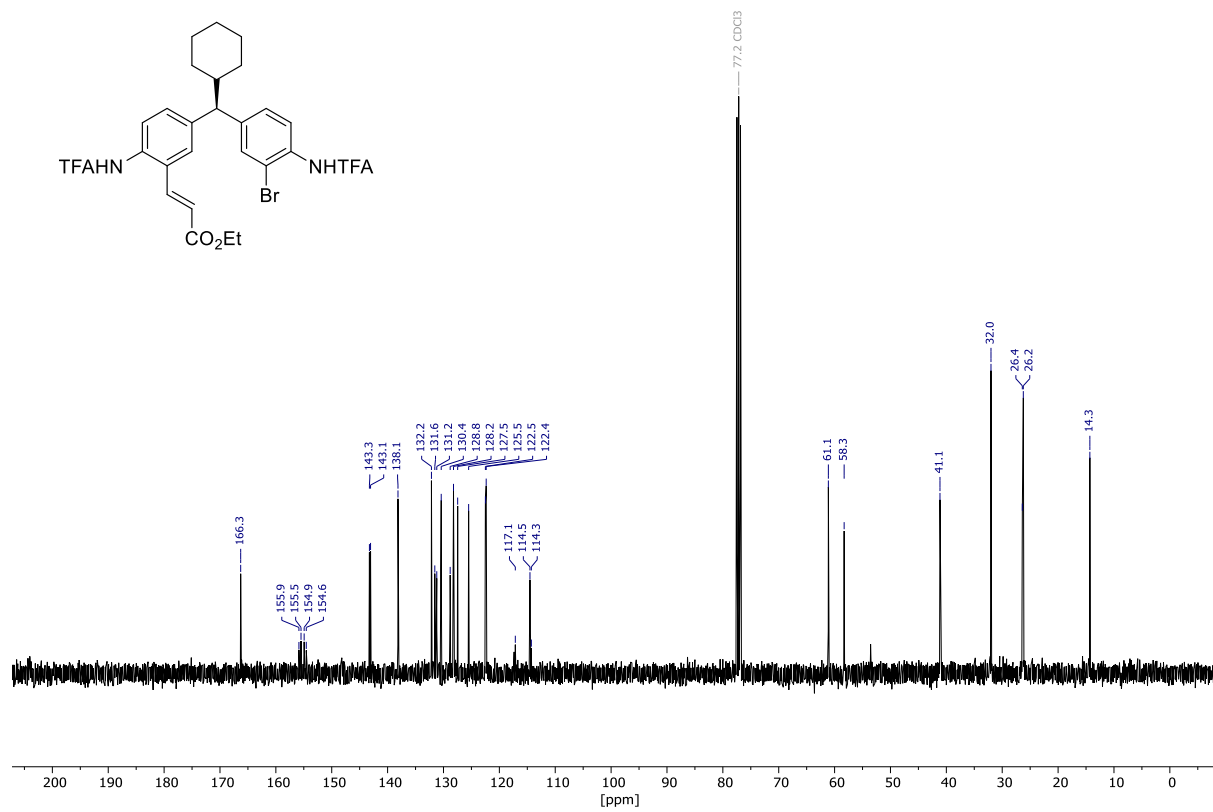

**$^{19}\text{F}$  NMR (376 MHz,  $\text{CDCl}_3$ ): 13**

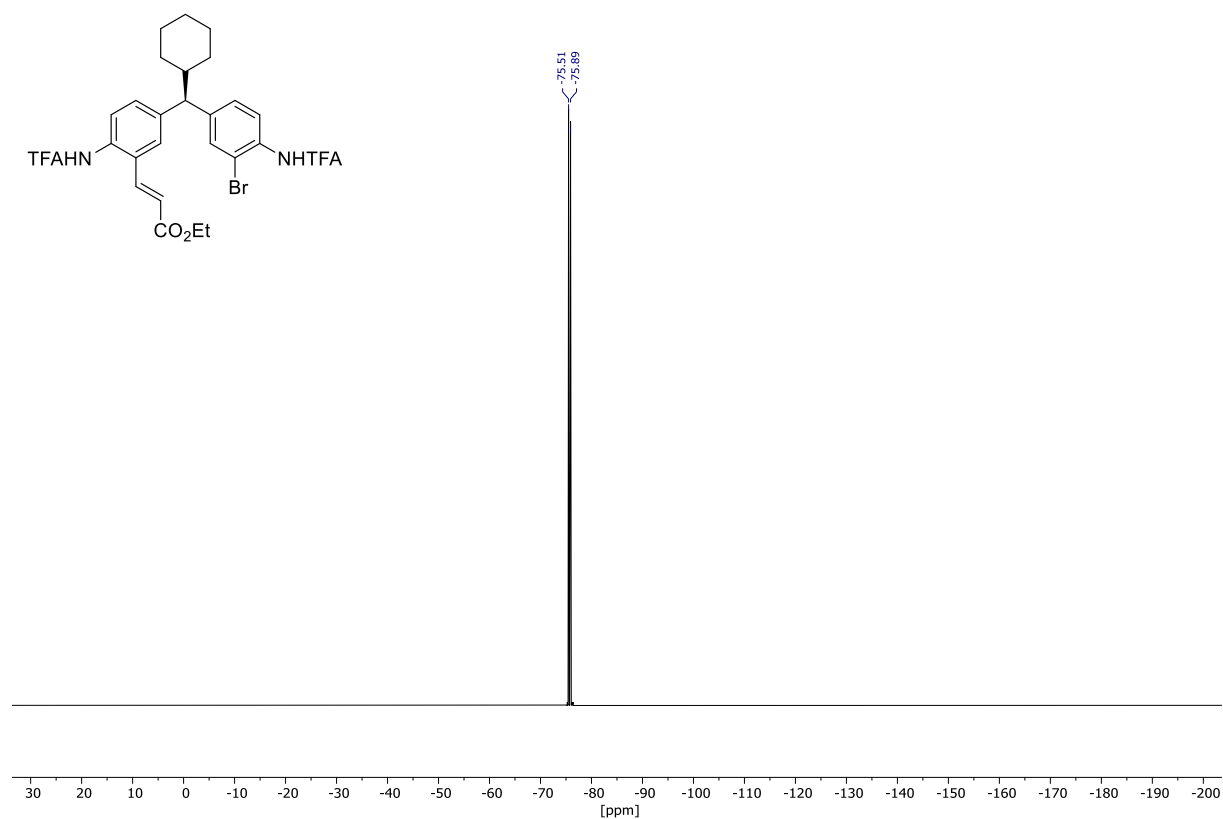

**$^1\text{H}$  NMR (400 MHz,  $\text{CDCl}_3$ ): 14**

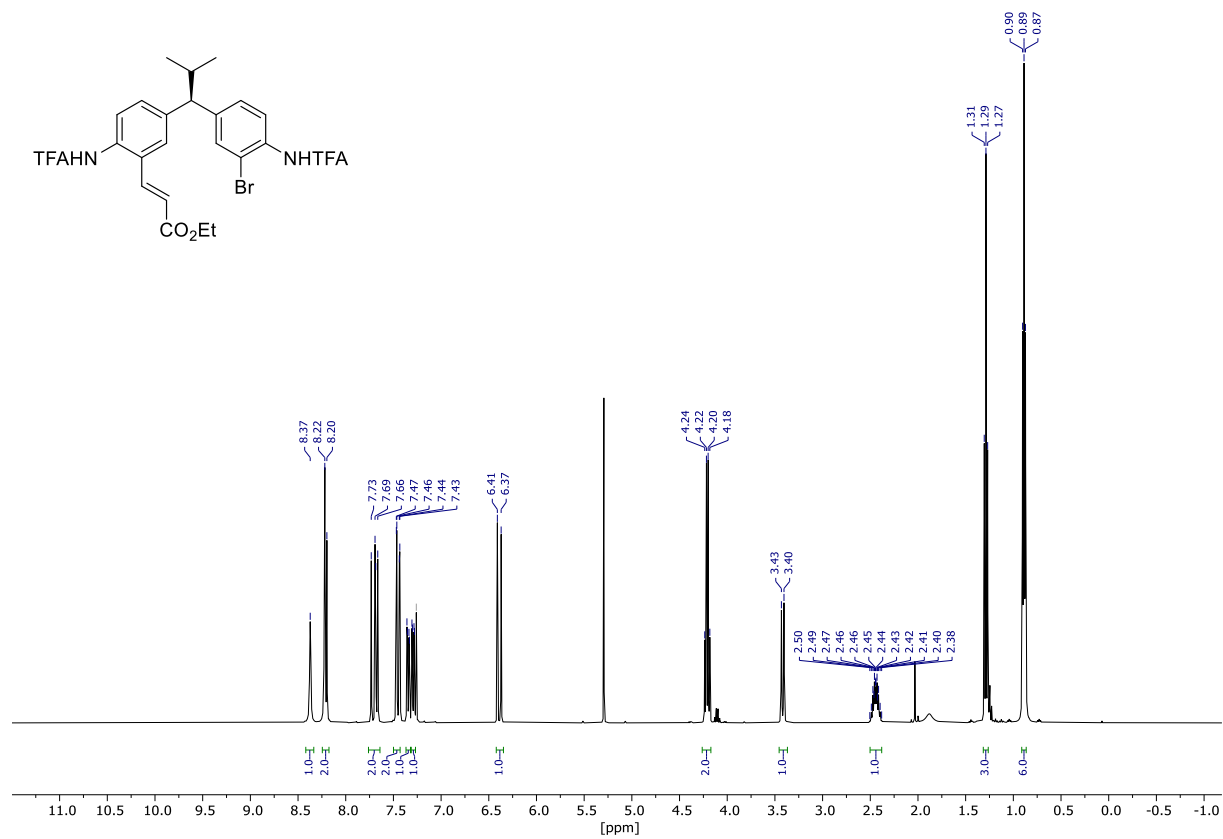

**$^{13}\text{C}$  NMR (101 MHz,  $\text{CDCl}_3$ ): 14**

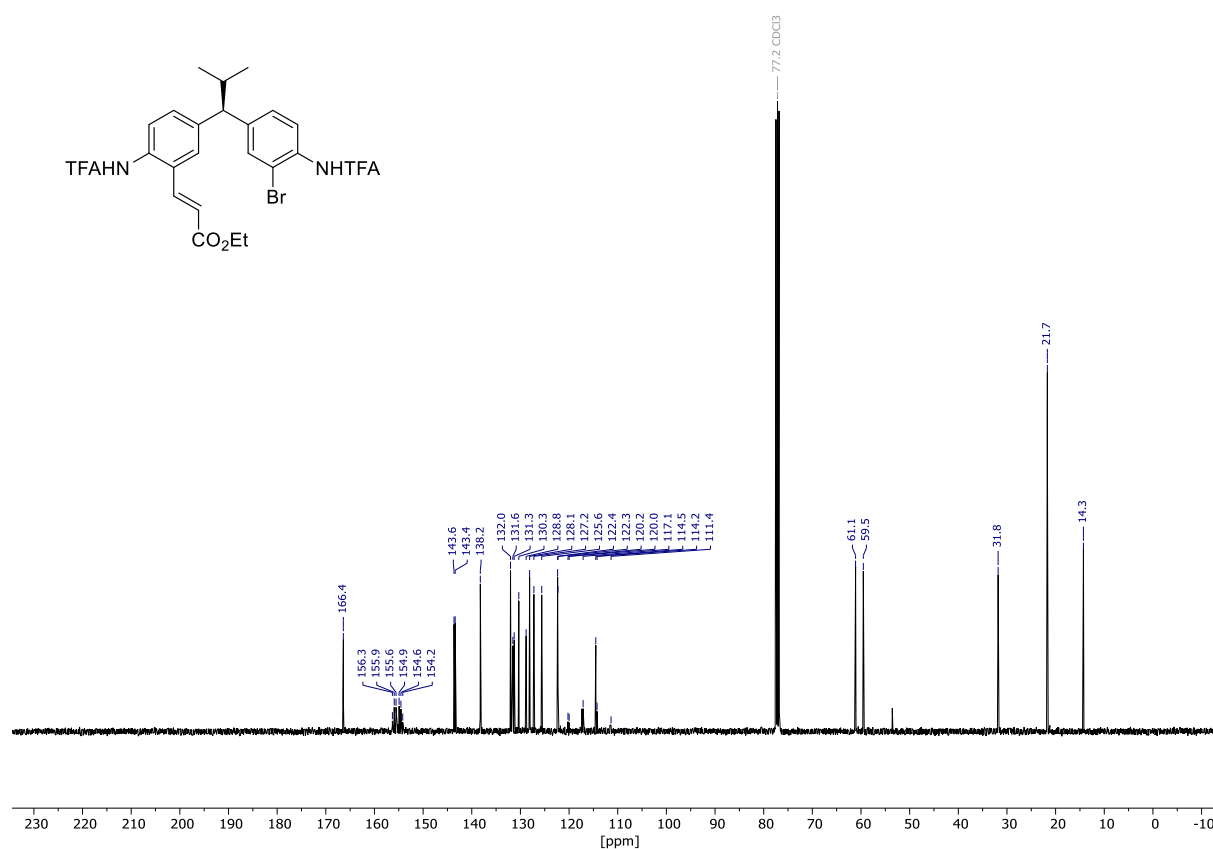

**$^{19}\text{F}$  NMR (376 MHz,  $\text{CDCl}_3$ ): 14**

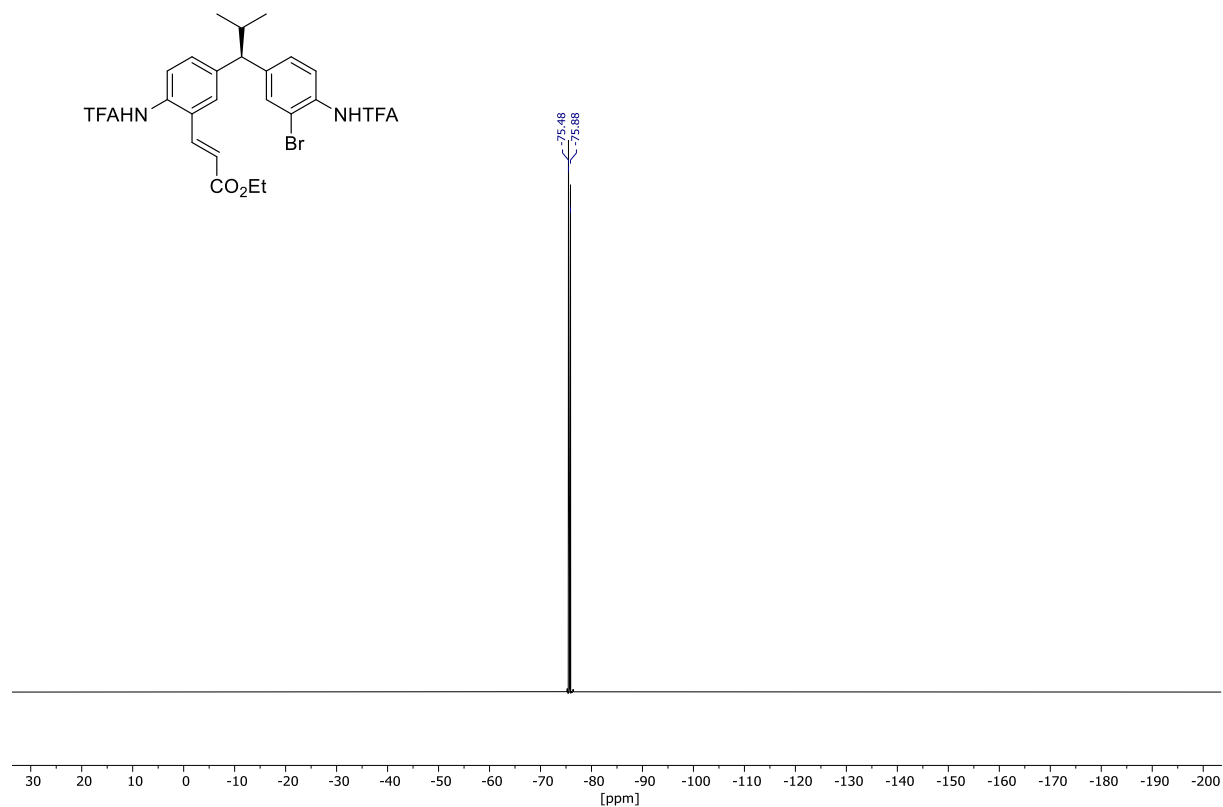

**<sup>1</sup>H NMR (400 MHz, CDCl<sub>3</sub>): 15**

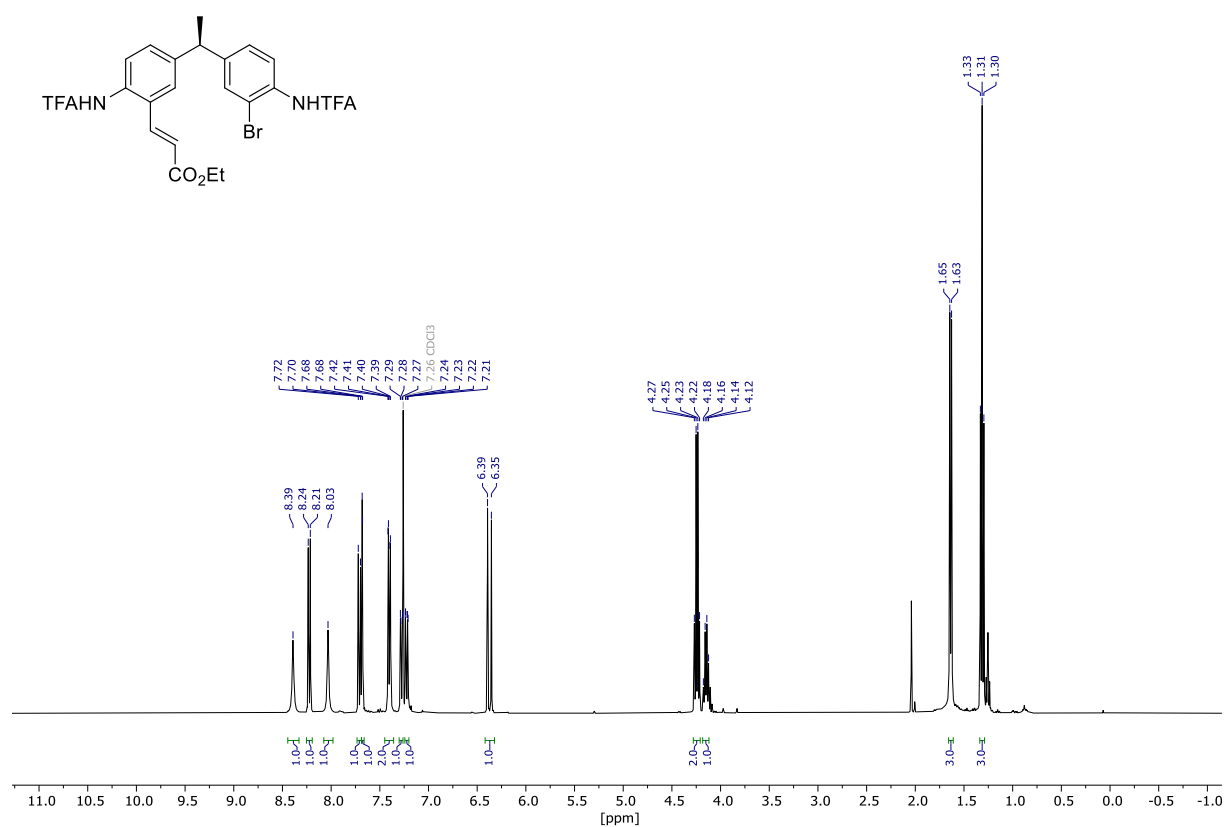

**<sup>13</sup>C NMR (101 MHz, CDCl<sub>3</sub>): 15**

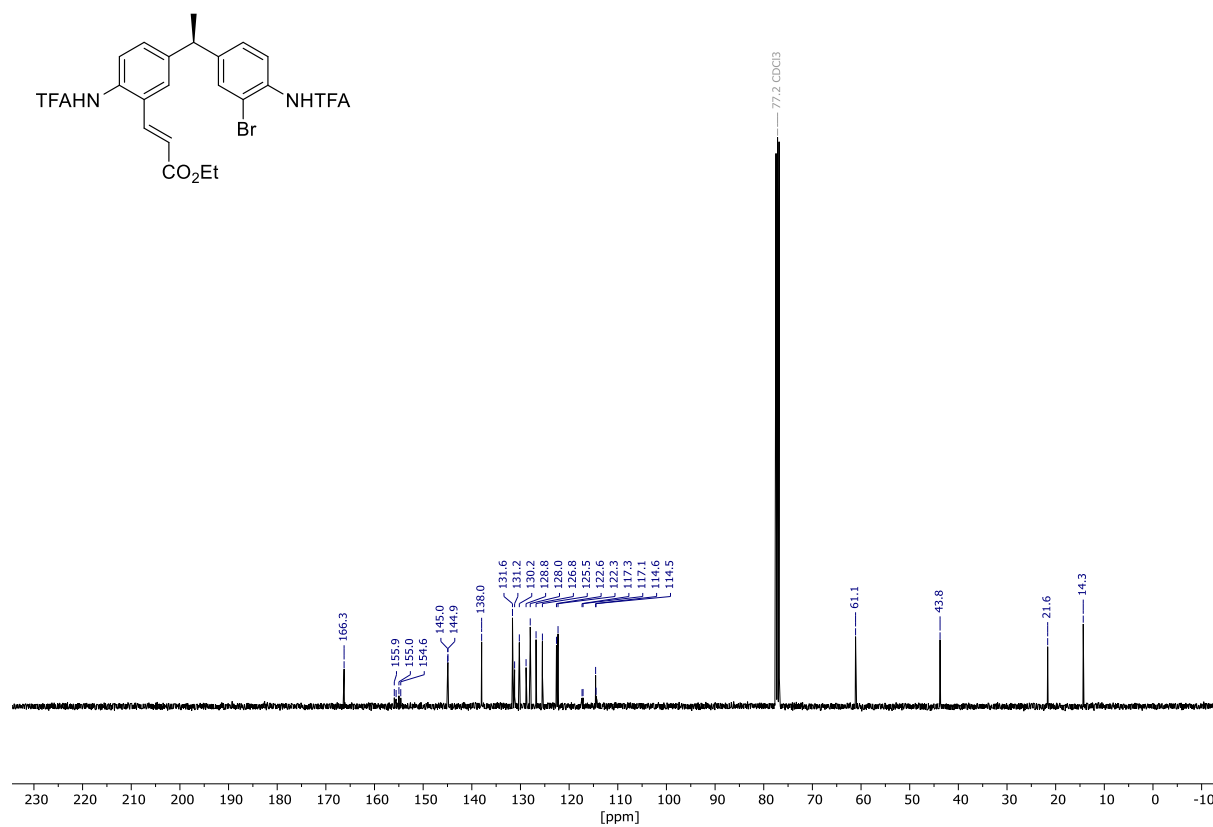

**$^{19}\text{F}$  NMR (376 MHz,  $\text{CDCl}_3$ ): 15**

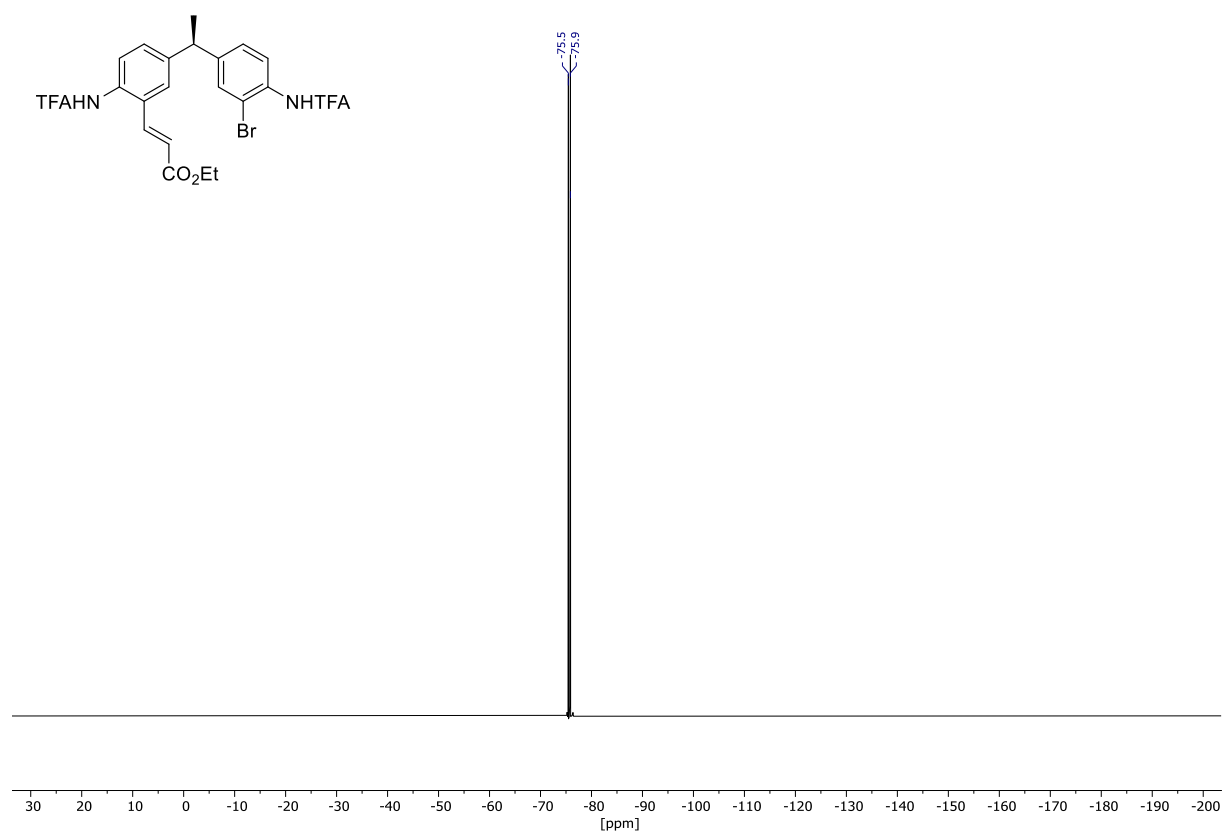

**$^1\text{H}$  NMR (400 MHz,  $\text{CDCl}_3$ ): 5**

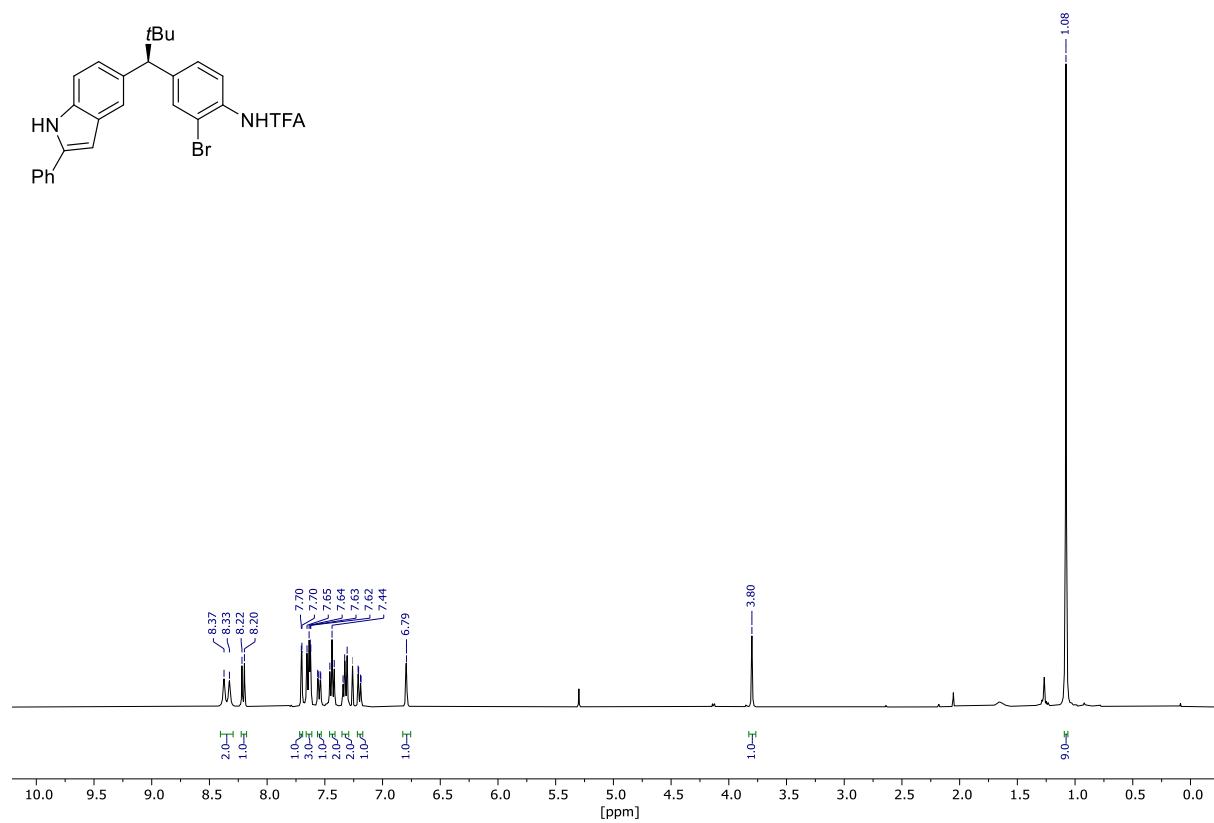

**$^{13}\text{C}$  NMR (101 MHz,  $\text{CDCl}_3$ ): 5**

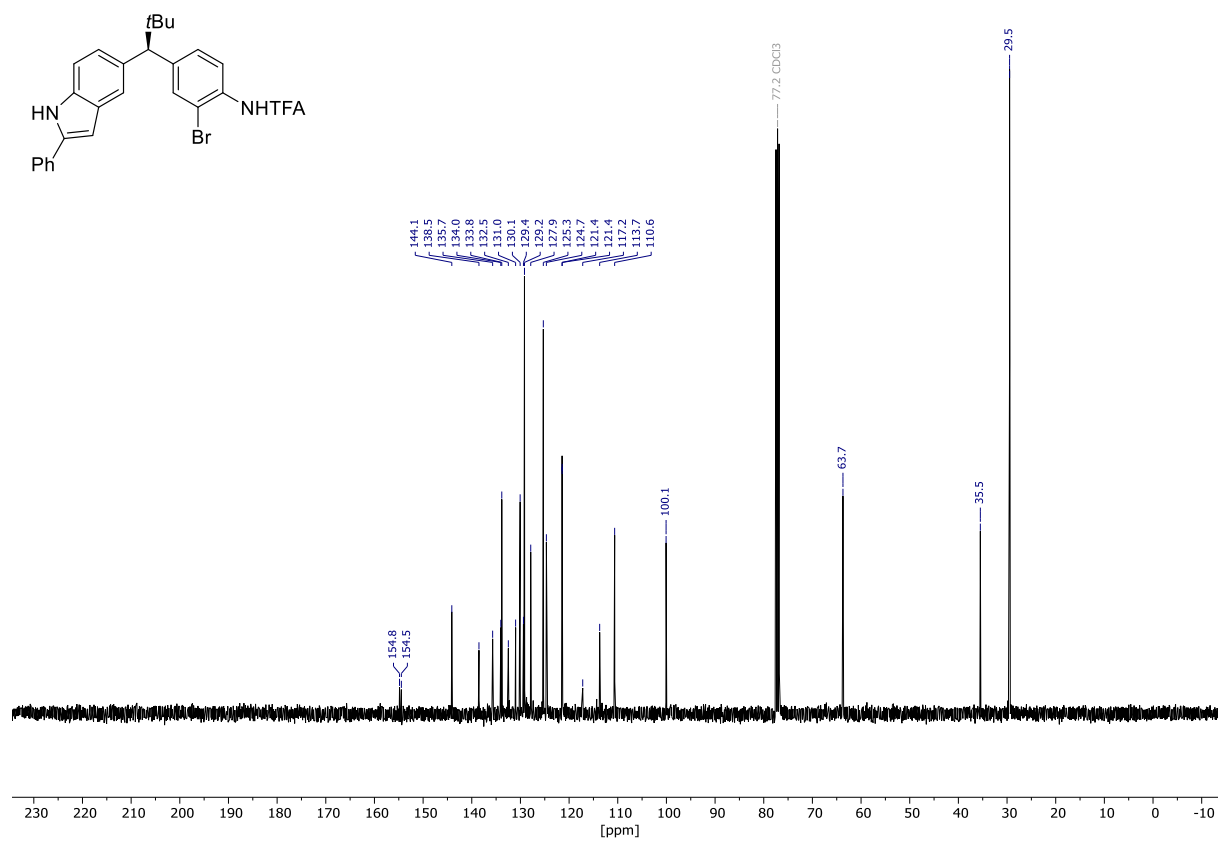

**$^{19}\text{F}$  NMR (376 MHz,  $\text{CDCl}_3$ ): 5**

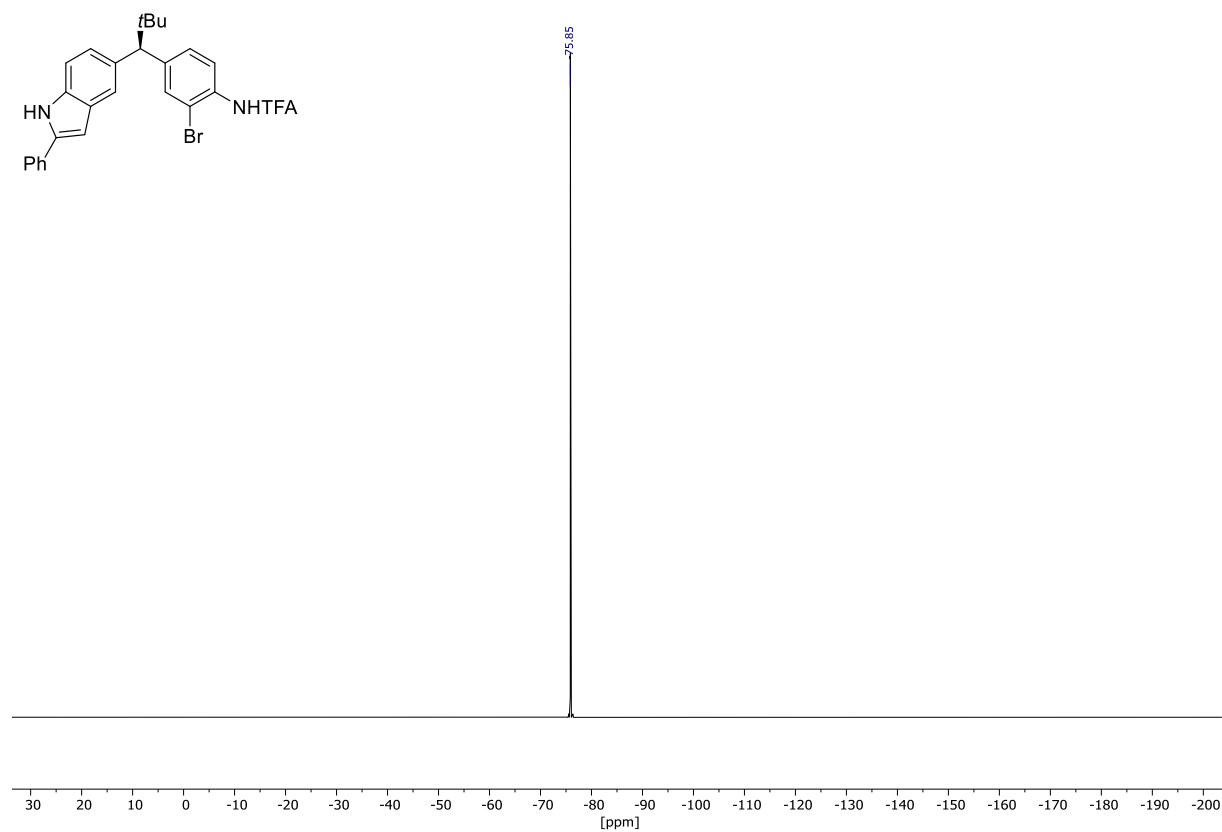

**<sup>1</sup>H NMR (400 MHz, CDCl<sub>3</sub>): 6**

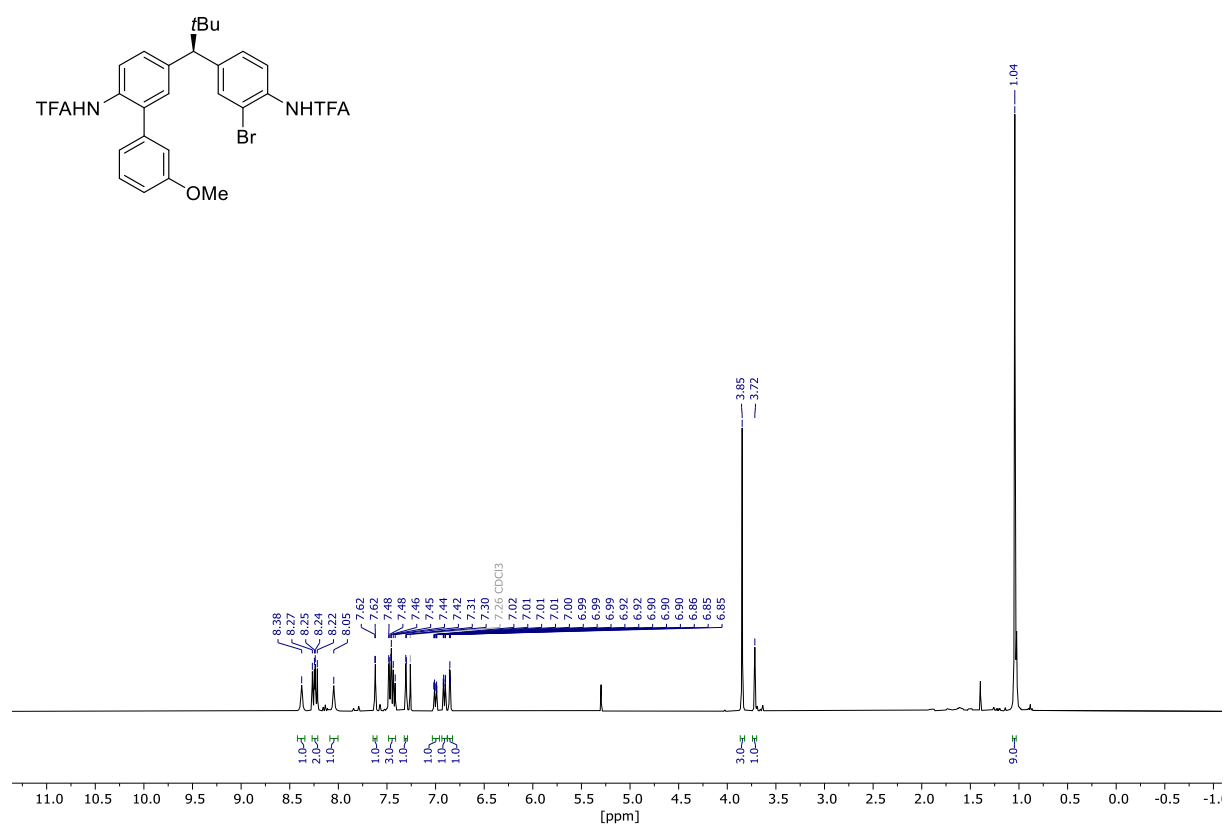

**<sup>13</sup>C NMR (101 MHz, CDCl<sub>3</sub>): 6**

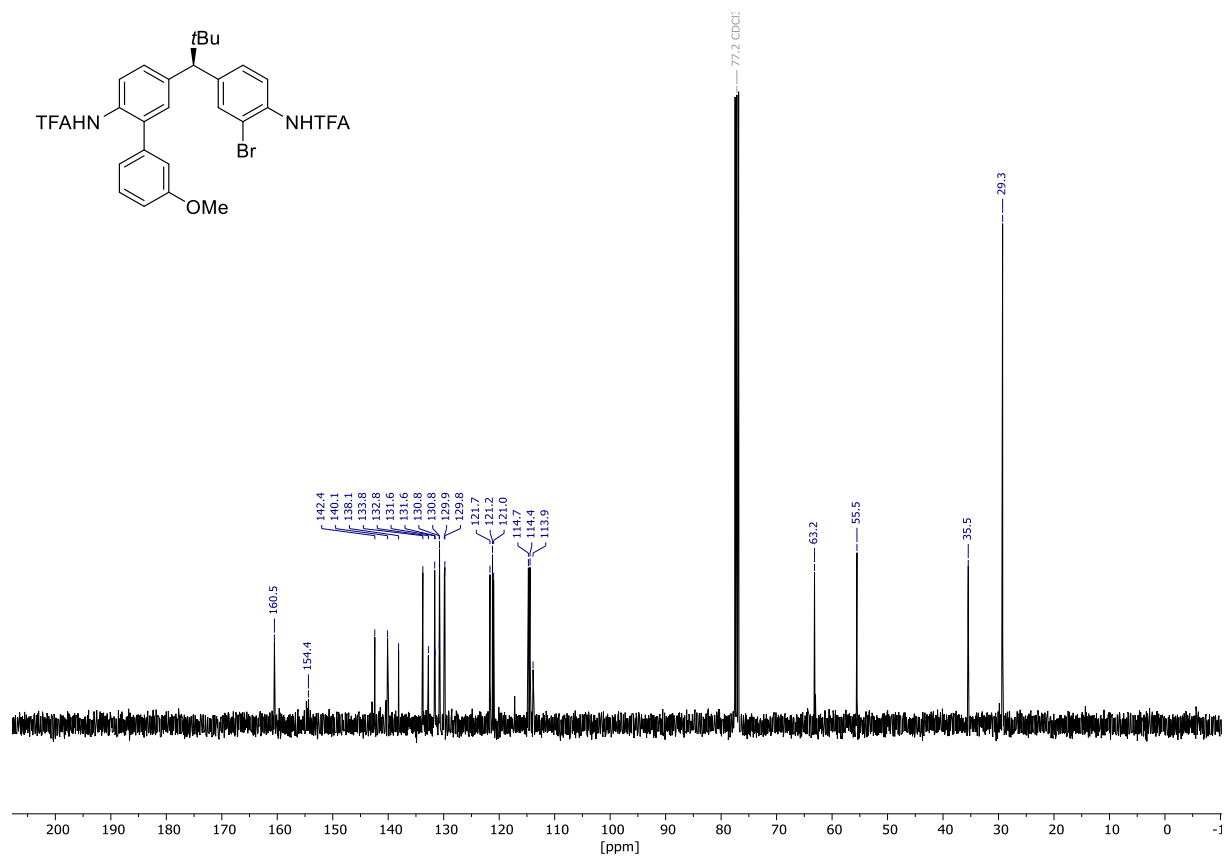

**<sup>19</sup>F NMR (376 MHz, CDCl<sub>3</sub>): 6**

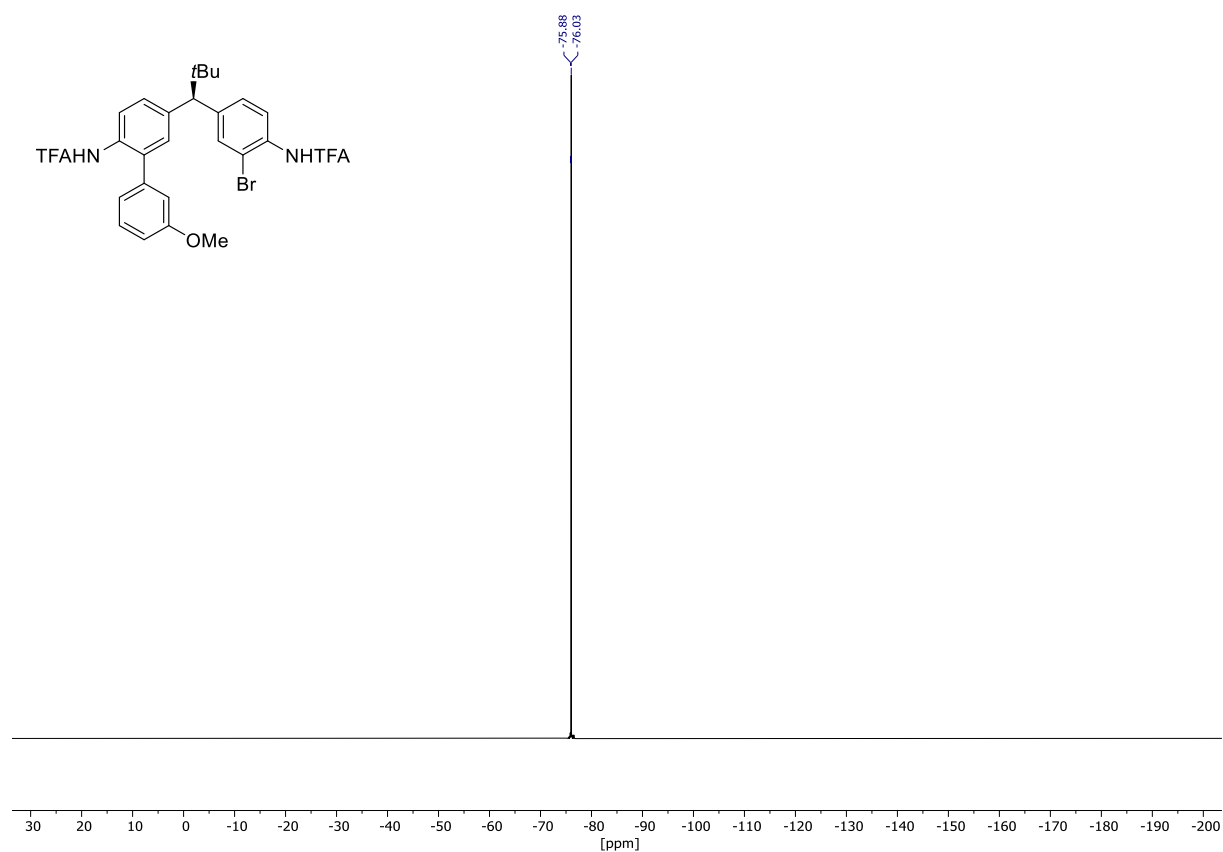

**<sup>1</sup>H NMR (400 MHz, CDCl<sub>3</sub>): 7**

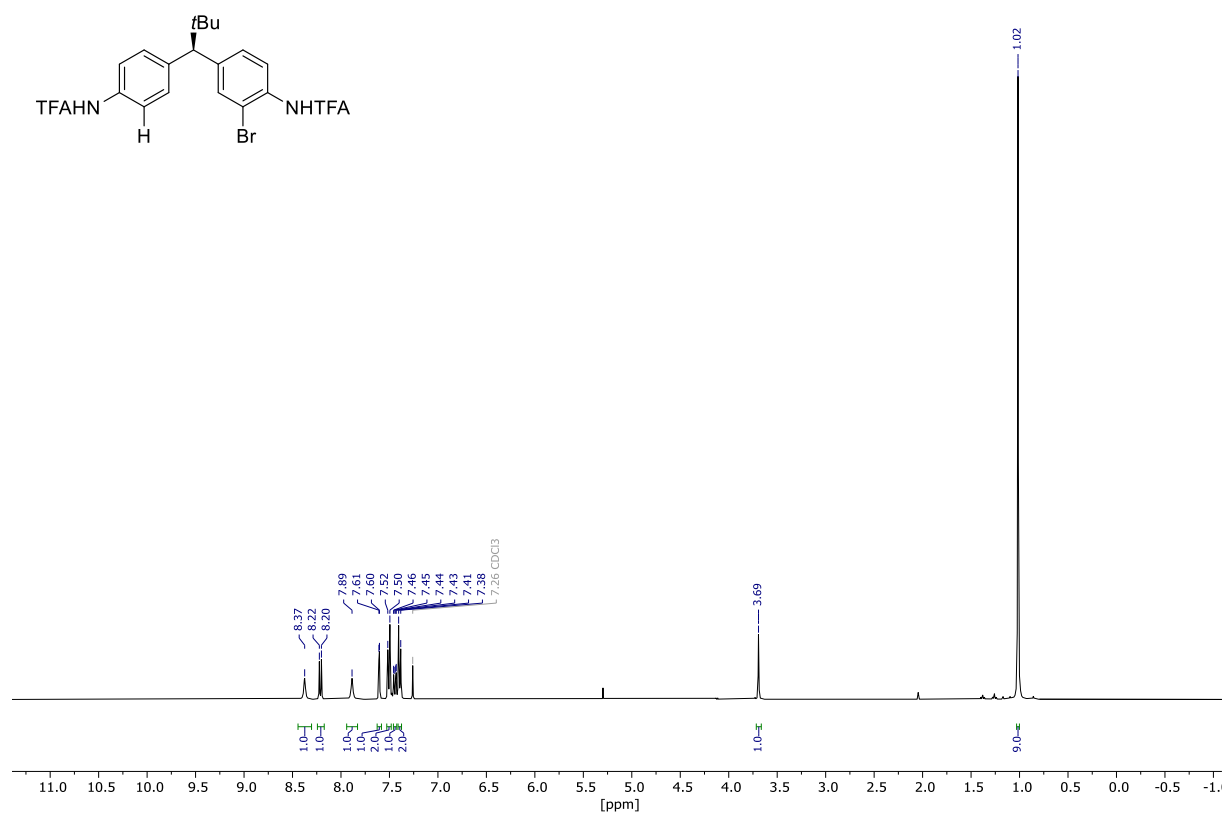



**$^{13}\text{C}$  NMR (101 MHz,  $\text{CDCl}_3$ ): 7**

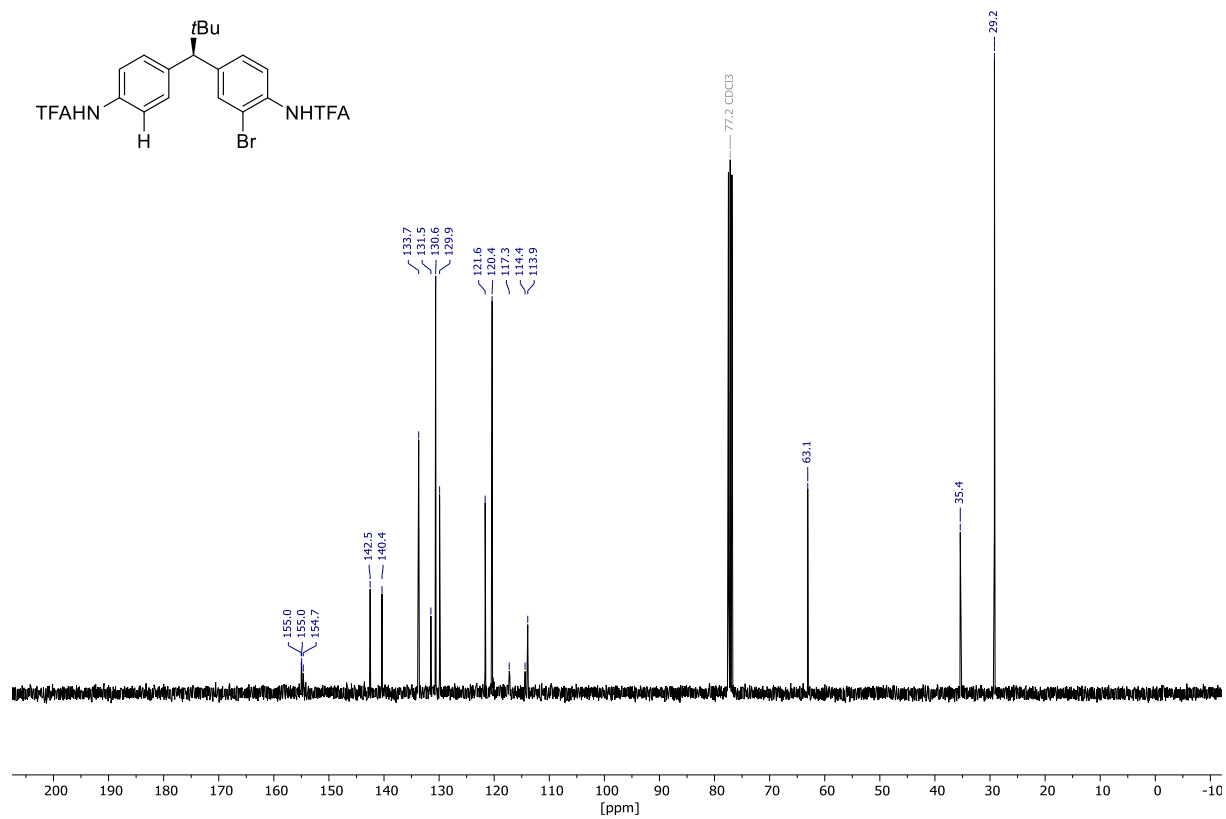

**$^{19}\text{F}$  NMR (376 MHz,  $\text{CDCl}_3$ ): 7**

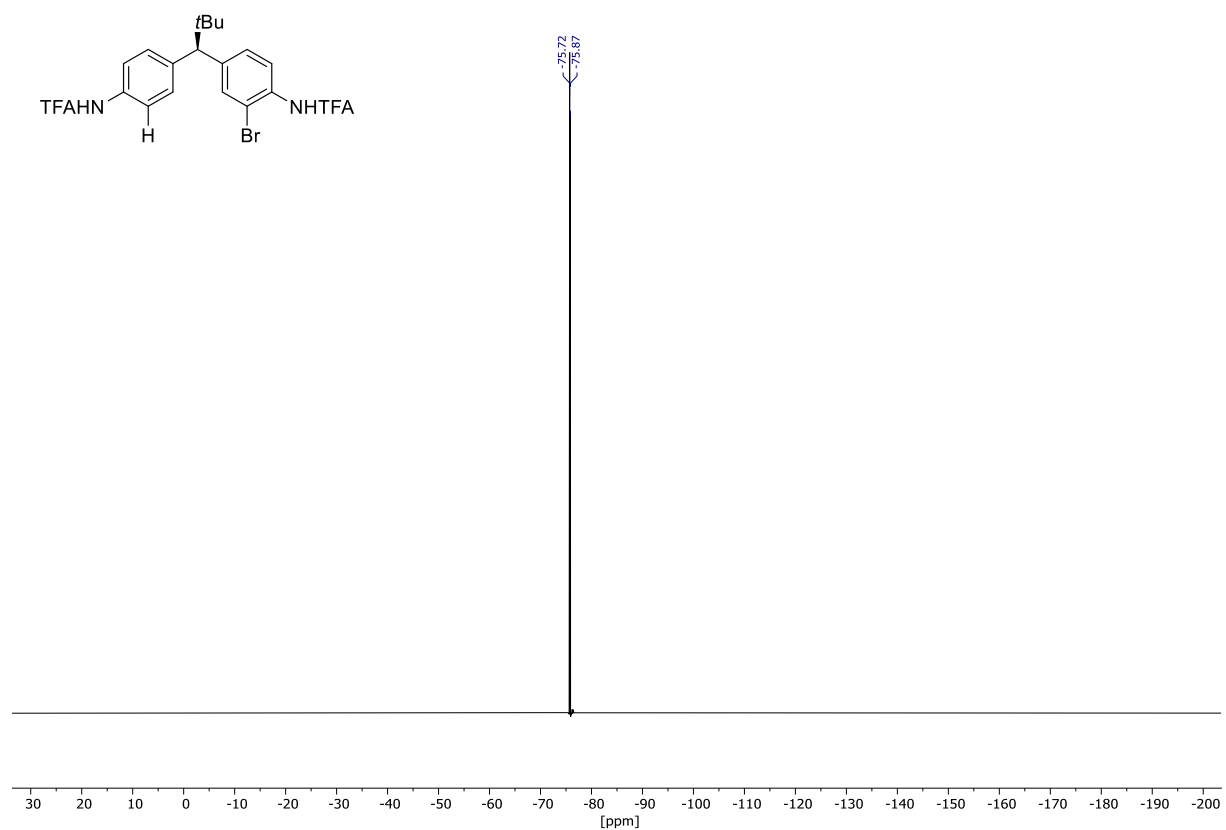

**<sup>1</sup>H NMR (400 MHz, CDCl<sub>3</sub>): 8**

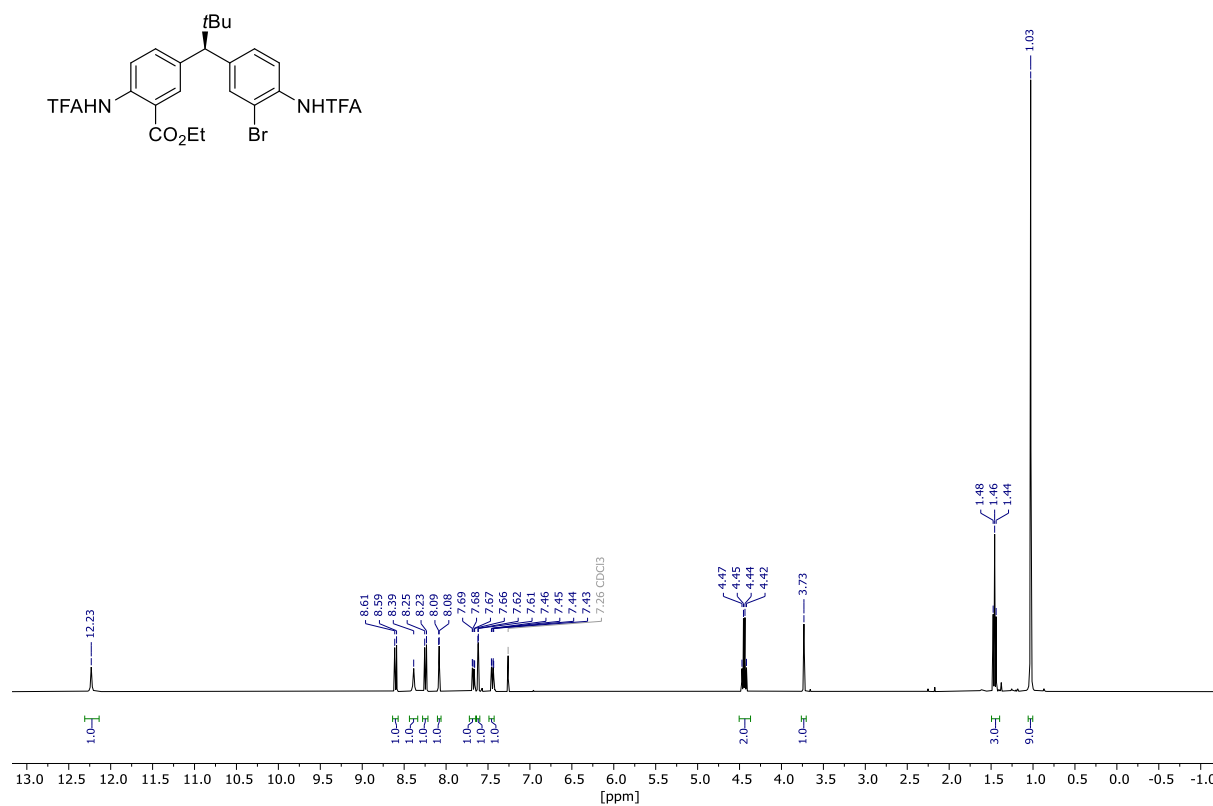

**<sup>13</sup>C NMR (101 MHz, CDCl<sub>3</sub>): 8**

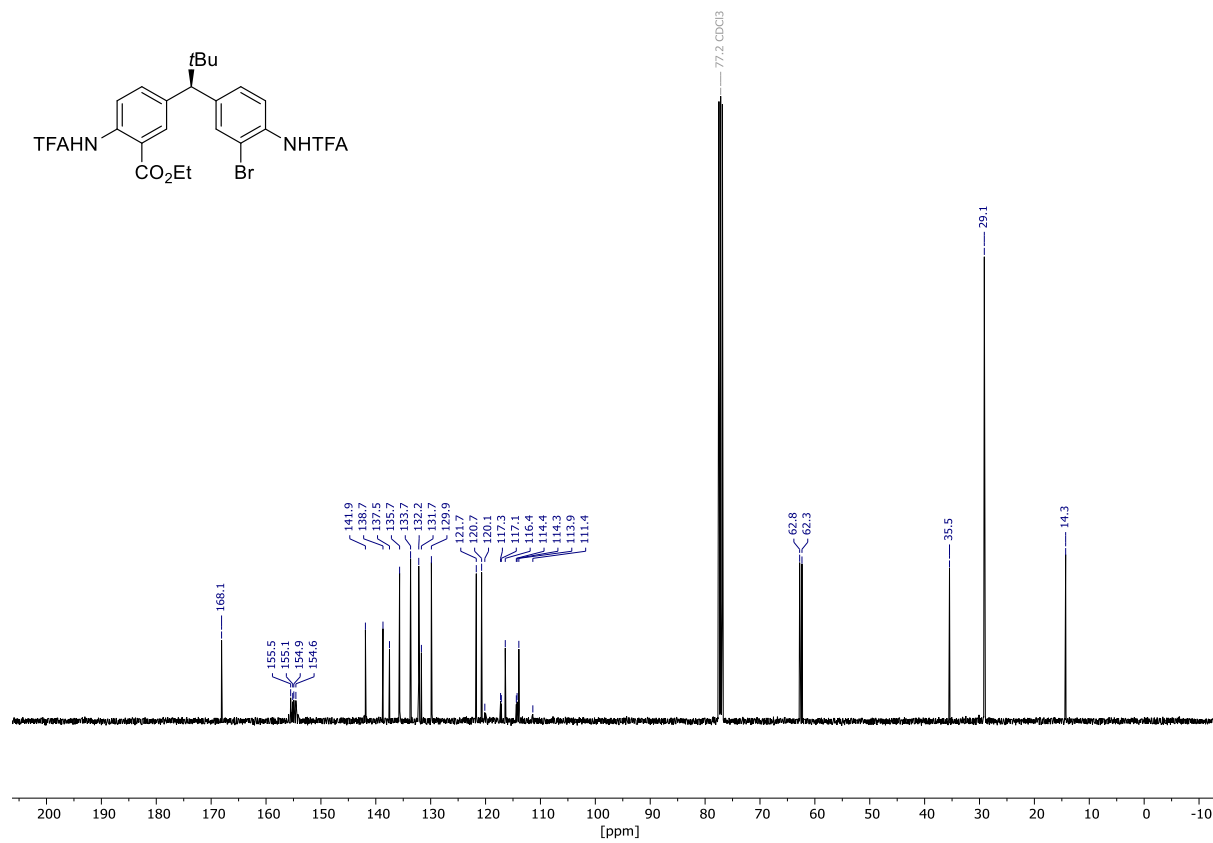

**$^{19}\text{F}$  NMR (376 MHz,  $\text{CDCl}_3$ ): 8**

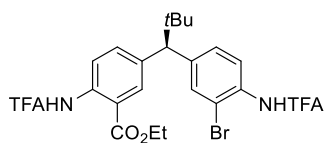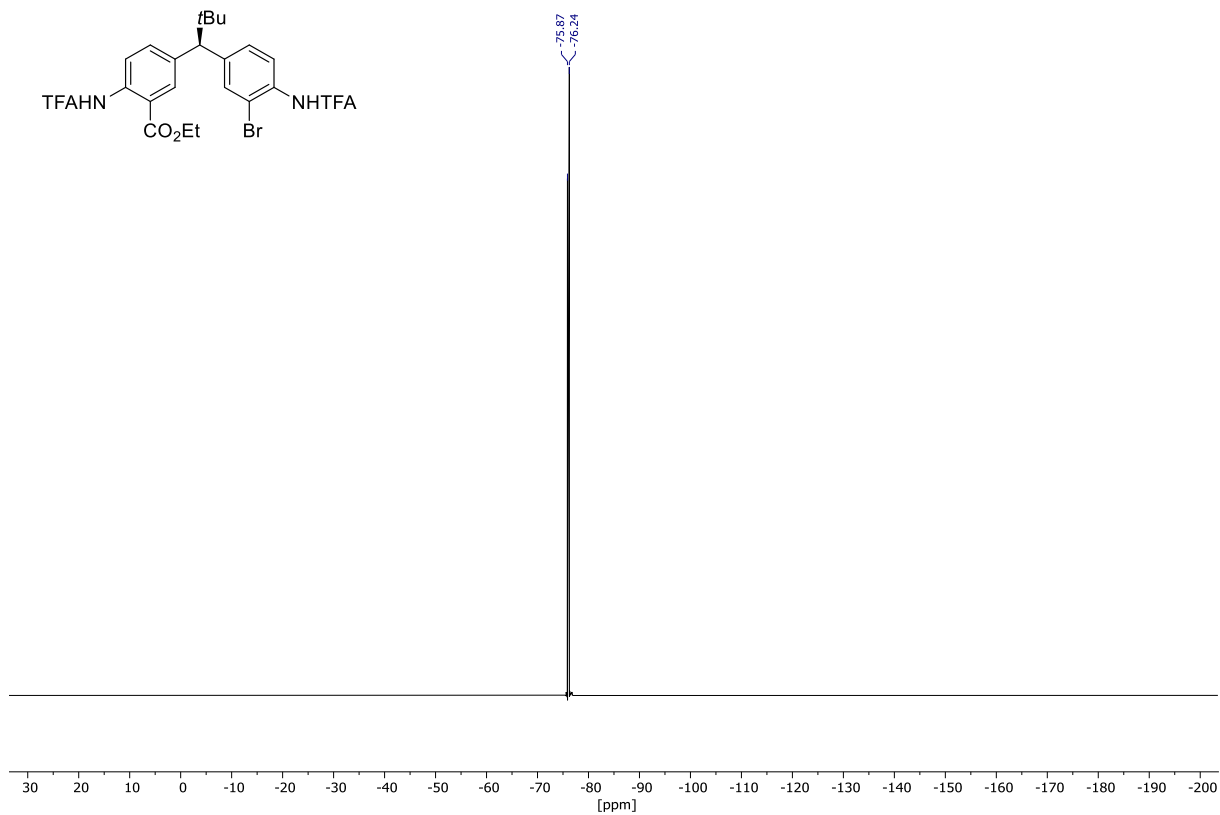

## 10. References

- <sup>1</sup> Fulmer, G. R.; Miller, A. J. M.; Sherden, N. H.; Gottlieb, H. E.; Nudelman, A.; Stoltz, B. M.; Bercaw, J. E.; Goldberg, K. I. *Organometallics* **2010**, *29*, 2176–2179.
- <sup>2</sup> Kim, B.; Chinn, A. J.; Fandrick, D. R.; Senanayake, C. H.; Singer, R. A.; *J. Am. Chem. Soc.* **2016**, *138*, 7939–7945.
- <sup>3</sup> Yoon, H.; Galls, A.; Rozema, S. D.; Miller, S. J. *Org. Lett.* **2022**, *24*, 762–766.
- <sup>4</sup> Chinn, A. J.; Kim, B.; Kwon, Y.; Miller, S. J. *J. Am. Chem. Soc.* **2017**, *139*, 18107–18114.
- <sup>5</sup> Kwon, Y.; Chinn, A. J.; Kim, B.; Miller, S. J. *Angew. Chem. Int. Ed.* **2018**, *57*, 6251–6255.
- <sup>6</sup> Schrödinger Release 2023-2: Maestro, Schrödinger, LLC, New York, NY, 2023.
- <sup>7</sup> C. Lu, C. Wu, D. Ghoreishi, W. Chen, L. Wang, W. Damm, G. A. Ross, M. K. Dahlgren, E. Russell, C. D. Von Bargen, R. Abel, R. A. Friesner, E. D. Harder, OPLS4: improving force field accuracy on challenging regimes of chemical space. *J. Chem. Theory Comput.* **2021**, *17*, 4291–4300.
- <sup>8</sup> M. J. Frisch, G. W. Trucks, H. B. Schlegel, G. E. Scuseria, M. A. Robb, J. R. Cheeseman, G. Scalmani, V. Barone, G. A. Petersson, H. Nakatsuji, X. Li, M. Caricato, A. V. Marenich, J. Bloino, B. G. Janesko, R. Gomperts, B. Mennucci, H. P. Hratchian, J. V. Ortiz, A. F. Izmaylov, J. L. Sonnenberg, D. Williams-Young, F. Ding, F. Lipparini, F. Egidi, J. Goings, B. Peng, A. Petrone, T. Henderson, D. Ranasinghe, V. G. Zakrzewski, J. Gao, N. Rega, G. Zheng, W. Liang, M. Hada, M. Ehara, K. Toyota, R. Fukuda, J. Hasegawa, M. Ishida, T. Nakajima, Y. Honda, O. Kitao, H. Nakai, T. Vreven, K. Throssell, J. A. Montgomery, Jr., J. E. Peralta, F. Ogliaro, M. J. Bearpark, J. J. Heyd, E. N. Brothers, K. N. Kudin, V. N. Staroverov, T. A. Keith, R. Kobayashi, J. Normand, K. Raghavachari, A. P. Rendell, J. C. Burant, S. S. Iyengar, J. Tomasi, M. Cossi, J. M. Millam, M. Klene, C. Adamo, R. Cammi, J. W. Ochterski, R. L. Martin, K. Morokuma, O. Farkas, J. B. Foresman, and D. J. Fox, *Gaussian 16, Revision C.01* (Gaussian, Inc., Wallingford CT, 2016).
- <sup>9</sup> NBO 7.0. E. D. Glendening, J. J. Badenhoop, A. E. Reed, J. E. Carpenter, J. A. Bohmann, C. M. Morales, P. Karafiloglou, C. R. Landis, and F. Weinhold. Theoretical Chemistry Institute, University of Wisconsin, Madison, 2018.
- <sup>10</sup> K. Jorner, MORFEUS; The source code is available at <https://github.com/kjelljorner/morfeus>.
- <sup>11</sup> G. Luchini, T. Patterson, T., R. S. Paton. DBSTEP: DFT Based Steric Parameters. 2022, DOI: 10.5281/zenodo.4702097
- <sup>12</sup> G. Luchini, J. V. Alegre-Requena, I. Funes-Ardoiz, R. S. Paton, *F1000Research*, **2020**, *9*, 291.
- <sup>13</sup> Gustafson, J.; Sigman, M. S.; Miller, S. J. *Org. Lett.* **2010**, *12*, 2794–2797.
- <sup>14</sup> Sheldrick, G. M. *Acta Cryst.* **2008**, *A64*, 112–122.
- <sup>15</sup> Dolomanov, O. V., Bourhis, L. J., Gildea, R. J., Howard, J. A. K.; Puschmann, H. *J. Appl. Cryst.* **2009**, *42*, 339–341.
