# Supplementary material
Source: PubMed Central journal article supplement (PMC10591928)
Supplement: NIHMS1936295-supplement-X-Ray_File.pdf [file NIHMS1936295-supplement-X-Ray_File.pdf]

## checkCIF (basic structural check) running

---

Checking for embedded fcf data in CIF ...

Found embedded fcf data in CIF. Extracting fcf data from uploaded CIF, please wait .....

## checkCIF/PLATON (basic structural check)

---

Structure factors have been supplied for datablock(s) syn-23123

THIS REPORT IS FOR GUIDANCE ONLY. IF USED AS PART OF A REVIEW PROCEDURE FOR PUBLICATION, IT SHOULD NOT REPLACE THE EXPERTISE OF AN EXPERIENCED CRYSTALLOGRAPHIC REFEREE.

No syntax errors found. [CIF dictionary](#)

Please wait while processing .... [Interpreting this report](#)

### Structure factor report

## Datablock: syn-23123

---

Bond precision: C-C = 0.0132 Å Wavelength=1.54184

Cell: a=12.38796(9) b=14.12473(10) c=13.3245(1)  
 alpha=90 beta=100.3448(7) gamma=90

Temperature: 93 K

|                        | Calculated            | Reported              |
|------------------------|-----------------------|-----------------------|
| Volume                 | 2293.58(3)            | 2293.58(3)            |
| Space group            | P 21                  | P 21                  |
| Hall group             | P 2yb                 | P 2yb                 |
| Moiety formula         | C21 H18 Br F6 I N2 O2 | C21 H18 Br F6 I N2 O2 |
| Sum formula            | C21 H18 Br F6 I N2 O2 | C21 H18 Br F6 I N2 O2 |
| Mr                     | 651.17                | 651.18                |
| Dx, g cm <sup>-3</sup> | 1.886                 | 1.886                 |
| Z                      | 4                     | 4                     |
| Mu (mm <sup>-1</sup> ) | 13.663                | 13.663                |
| F000                   | 1264.0                | 1264.0                |
| F000'                  | 1264.22               |                       |
| h,k,lmax               | 15,18,17              | 15,17,16              |
| Nref                   | 9956[ 5185]           | 9705                  |
| Tmin,Tmax              | 0.530,0.872           | 0.265,1.000           |
| Tmin'                  | 0.481                 |                       |

Correction method= # Reported T Limits: Tmin=0.265 Tmax=1.000 AbsCorr = MULTI-SCAN

Data completeness= 1.87/0.97 Theta(max)= 79.806

R(reflections)= 0.0349( 9470) wR2(reflections)= 0.0916( 9705)

S = 1.083 Npar= 602

The following ALERTS were generated. Each ALERT has the format

**test-name\_ALERT\_alert-type\_alert-level.**

Click on the hyperlinks for more details of the test.

### ● Alert level C

[PLAT094\\_ALERT\\_2\\_C](#) Ratio of Maximum / Minimum Residual Density .... 2.12 Report  
[PLAT342\\_ALERT\\_3\\_C](#) Low Bond Precision on C-C Bonds ..... 0.01315 Ang.  
[PLAT971\\_ALERT\\_2\\_C](#) Check Calcd Resid. Dens. 0.39Ang From Br1\_2 2.07 eA-3  
[PLAT971\\_ALERT\\_2\\_C](#) Check Calcd Resid. Dens. 0.78Ang From Br1\_2 1.61 eA-3

**Alert level G**

PLAT007\_ALERT\_5\_G Number of Unrefined Donor-H Atoms ..... 4 Report  
PLAT033\_ALERT\_4\_G Flack x Value Deviates > 3.0 \* sigma from Zero . 0.184 Note  
PLAT083\_ALERT\_2\_G SHELXL Second Parameter in WGHT Unusually Large 9.37 Why ?  
PLAT111\_ALERT\_2\_G ADDSYM Detects New (Pseudo) Centre of Symmetry . 100 %Fit

**Author Response: See the reply to PLAT113**

PLAT112\_ALERT\_2\_G ADDSYM Detects New (Pseudo) Symm. Elem c 100 %Fit

**Author Response: See the reply to PLAT113**

PLAT113\_ALERT\_2\_G ADDSYM Suggests Possible Pseudo/New Space Group P21/c Check  
Check Model Parameter Symmetry for Reflection Data Support

**Author Response: The solution in P2(1)/c was explored. However, the pseudosymmetry of the c-glide requires the I and Br to occupy the same space. These distributions were freely refined and converged near 50/50. However, the refinement metrics of P2(1)/c are much worse than P2(1), implying the polar space group is correct. The I and Br atoms are not related by crystallographic symmetry.**

PLAT142\_ALERT\_4\_G s.u. on b - Axis Small or Missing ..... 0.00010 Ang.  
PLAT143\_ALERT\_4\_G s.u. on c - Axis Small or Missing ..... 0.00010 Ang.  
PLAT242\_ALERT\_2\_G Low 'MainMol' Ueq as Compared to Neighbors of C21\_1 Check  
PLAT242\_ALERT\_2\_G Low 'MainMol' Ueq as Compared to Neighbors of C13\_2 Check  
PLAT434\_ALERT\_2\_G Short Inter HL..HL Contact I1\_2 ..F4\_2 . 3.24 Ang.  
x,-1+y,z = 1\_545 Check  
PLAT720\_ALERT\_4\_G Number of Unusual/Non-Standard Labels ..... 102 Note  
PLAT912\_ALERT\_4\_G Missing # of FCF Reflections Above STh/L= 0.600 52 Note  
PLAT933\_ALERT\_2\_G Number of HKL-OMIT Records in Embedded .res File 1 Note  
PLAT965\_ALERT\_2\_G The SHELXL WEIGHT Optimisation has not Converged Please Check  
PLAT978\_ALERT\_2\_G Number C-C Bonds with Positive Residual Density. 1 Info

---

0 **ALERT level A** = Most likely a serious problem - resolve or explain  
0 **ALERT level B** = A potentially serious problem, consider carefully  
4 **ALERT level C** = Check. Ensure it is not caused by an omission or oversight  
16 **ALERT level G** = General information/check it is not something unexpected

0 ALERT type 1 CIF construction/syntax error, inconsistent or missing data  
13 ALERT type 2 Indicator that the structure model may be wrong or deficient  
1 ALERT type 3 Indicator that the structure quality may be low  
5 ALERT type 4 Improvement, methodology, query or suggestion  
1 ALERT type 5 Informative message, check

---

It is advisable to attempt to resolve as many as possible of the alerts in all categories. Often the minor alerts point to easily fixed oversights, errors and omissions in your CIF or refinement strategy, so attention to these fine details can be worthwhile. In order to resolve some of the more serious problems it may be necessary to carry out additional measurements or structure refinements. However, the purpose of your study may justify the reported deviations and the more serious of these should normally be commented upon in the discussion or experimental section of a paper or in the "special\_details" fields of the CIF. checkCIF was carefully designed to identify outliers and unusual parameters, but every test has its limitations and alerts that are not important in a particular case may appear. Conversely, the absence of alerts does not guarantee there are no aspects of the results needing attention. It is up to the individual to critically assess their own results and, if necessary, seek expert advice.

**Publication of your CIF in IUCr journals**

A basic structural check has been run on your CIF. These basic checks will be run on all CIFs submitted for publication in IUCr journals (*Acta Crystallographica*, *Journal of Applied Crystallography*, *Journal of Synchrotron Radiation*); however, if you intend to submit to *Acta Crystallographica Section C* or *E* or *IUCrData*, you should make sure that **full publication checks** are run on the final version of your CIF prior to submission.

**Publication of your CIF in other journals**

Please refer to the *Notes for Authors* of the relevant journal for any special instructions relating to CIF submission.

PLATON version of 06/07/2023; check.def file version of 30/06/2023

**Datablock syn-23123 - ellipsoid plot**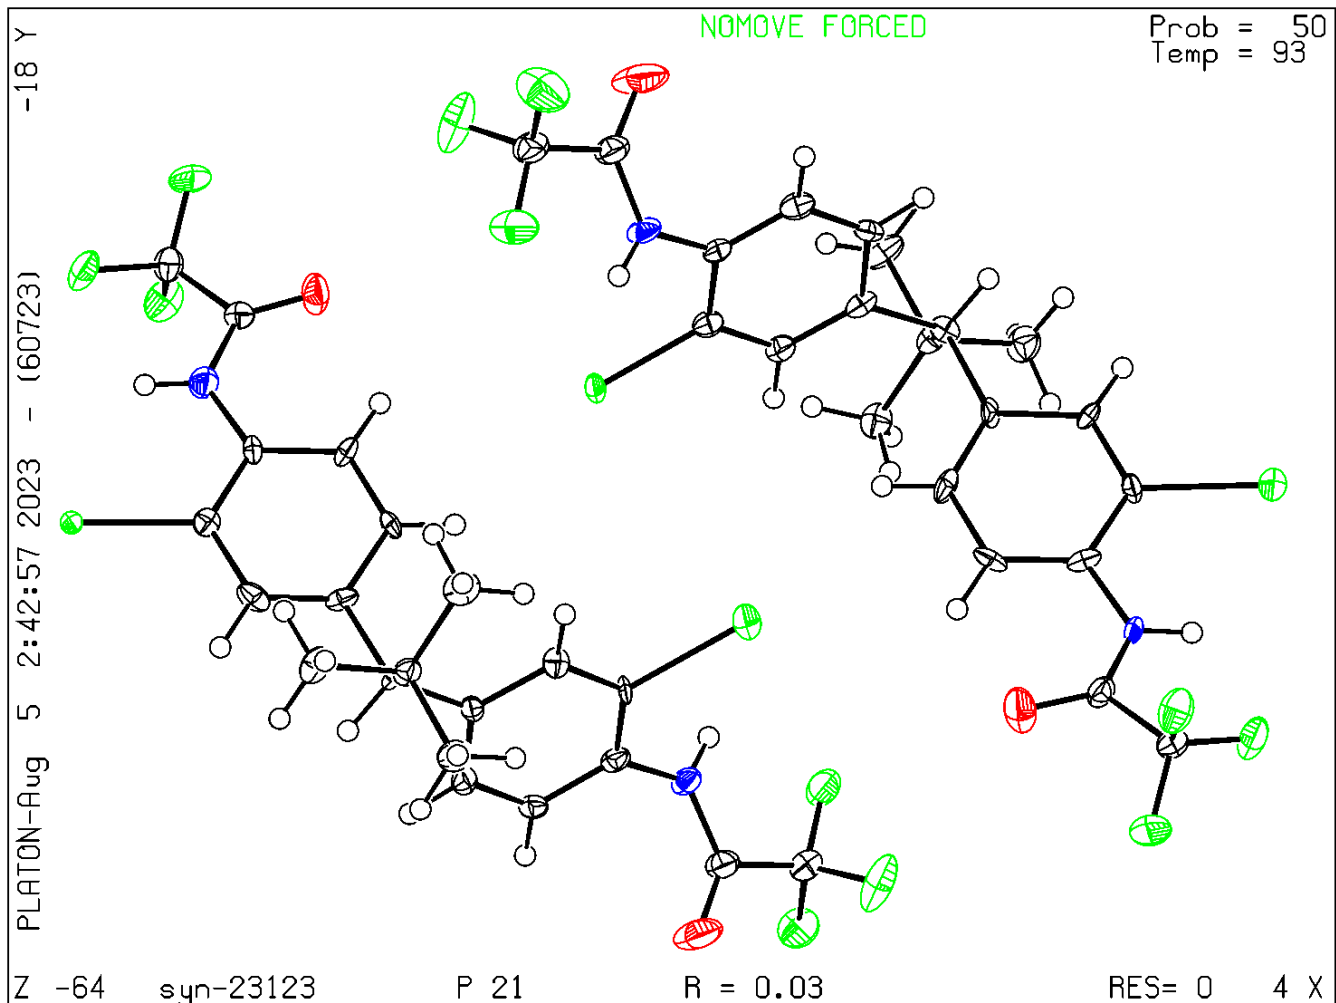

[Download CIF editor \(pubCIF\) from the IUCr](#)  
[Download CIF editor \(enCIFer\) from the CCDC](#)  
[Test a new CIF entry](#)
